# Supplementary material for: Whole-Genome Duplication and Purifying Selection Contributes to the Functional Redundancy of Auxin Response Factor (ARF) Genes in Foxtail Millet (Setaria italica L.)
Source: Hindawi journal article supplement (doi:10.1155/2021/2590665), 2021-08-06
Supplement: f1 [file 2590665.f1.zip]

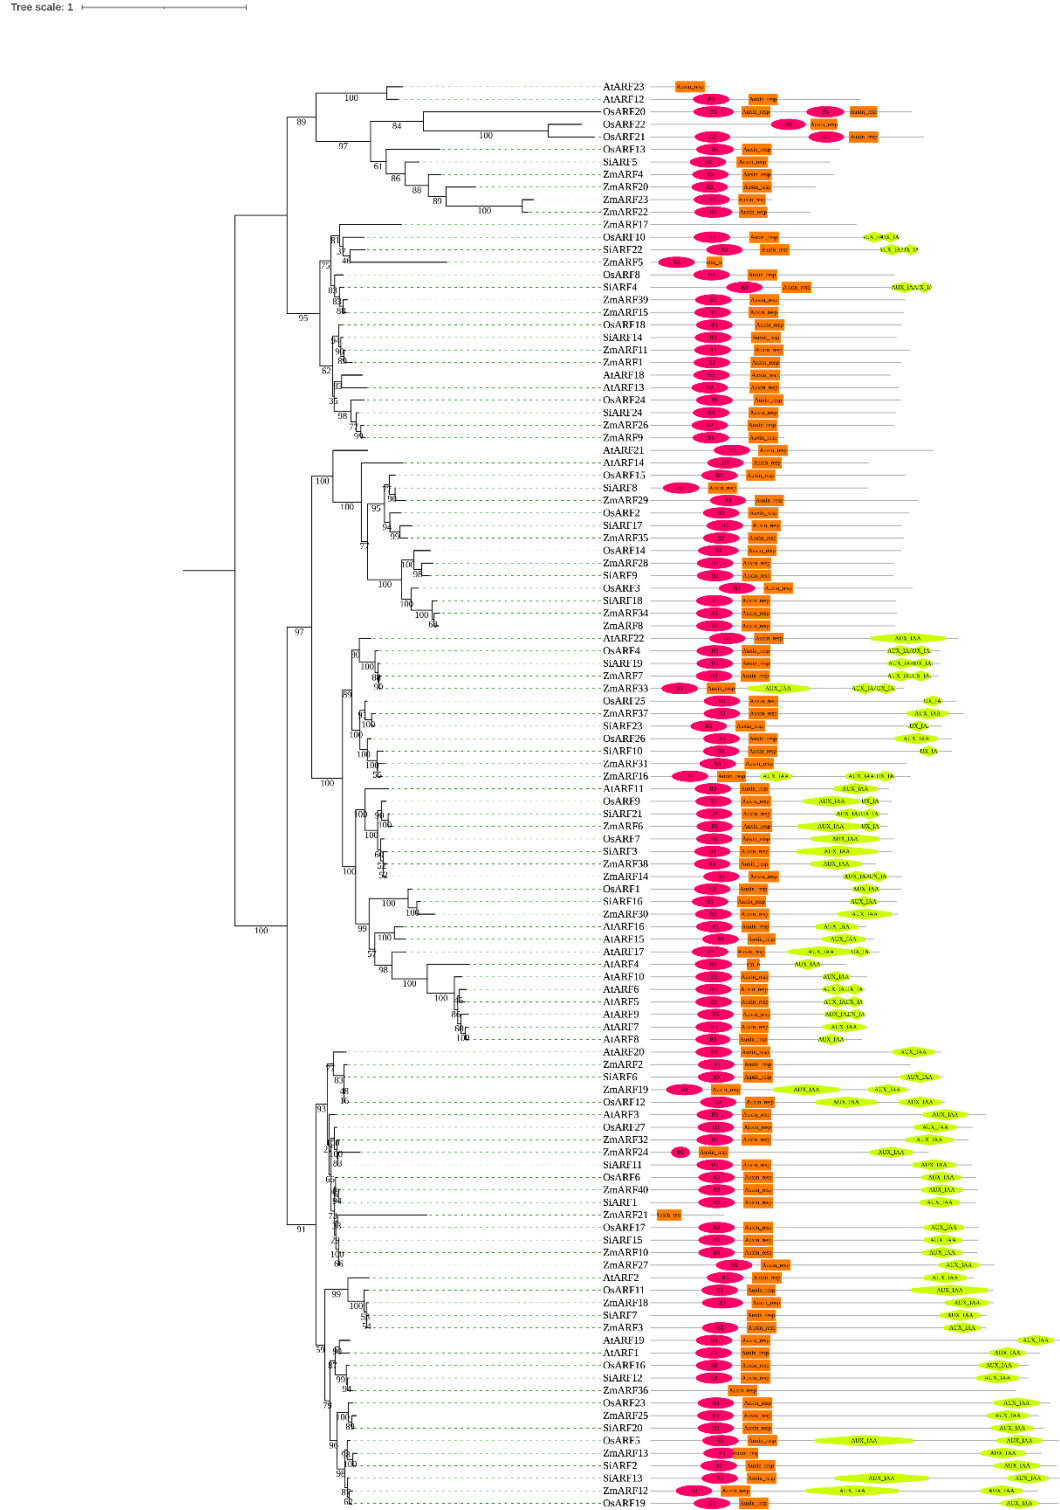

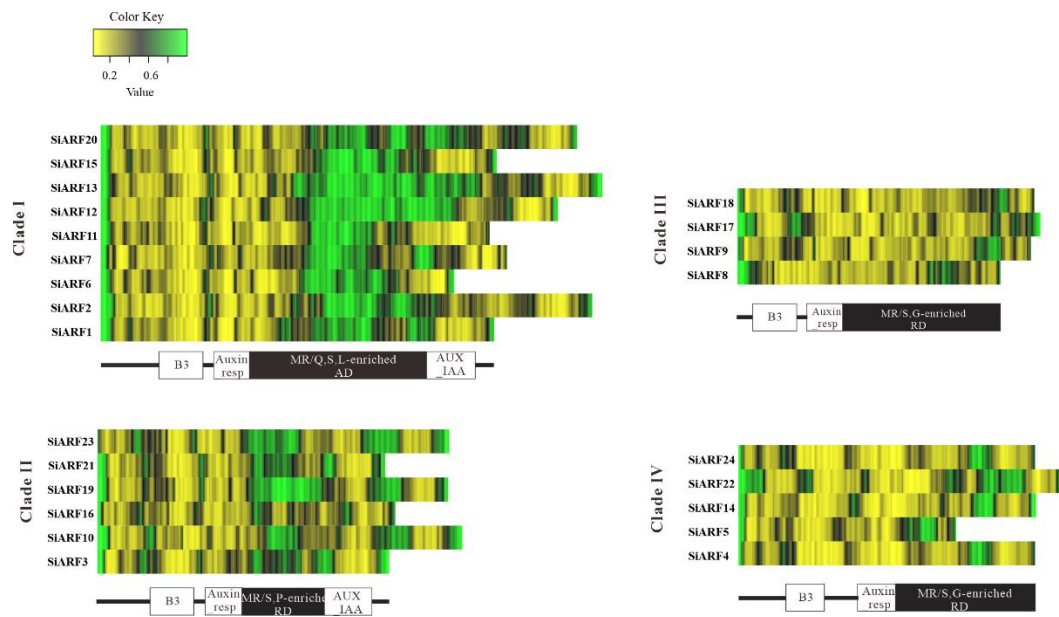

**Figure S2: Intrinsic disorder and transcriptionally activity prediction of *SiARFs*. Green indicated unstructured protein scores.**

Table S1 Synonymous and non-synonymous values of SiARFs WGD duplicate pairs

| Duplicated pairs |                  | Ks      | Ka     | Ka/Ks  |
|------------------|------------------|---------|--------|--------|
| Seita.1G077200.1 | Seita.4G262300.1 | 0.6948  | 0.1175 | 0.17   |
| Seita.1G090900.1 | Seita.4G240600.1 | 0.9073  | 0.1397 | 0.15   |
| Seita.1G195500.1 | Seita.7G108100.1 | 0.8343  | 0.1443 | 0.17   |
| Seita.1G241500.1 | Seita.7G169600.1 | 1.4384  | 0.2246 | 0.16   |
| Seita.1G241500.1 | Seita.9G219800.1 | 28.1995 | 0.2581 | 0.0092 |
| Seita.7G169600.1 | Seita.9G219800.1 | 35.4072 | 0.3387 | 0.0096 |
| Seita.3G147000.1 | Seita.5G321300.1 | 1.6641  | 0.5038 | 0.3027 |
| Seita.3G147000.1 | Seita.5G265200.1 | 0.6646  | 0.2722 | 0.4095 |
| Seita.5G321300.1 | Seita.5G265200.1 | 1.4938  | 0.5144 | 0.3443 |
| Seita.3G179300.1 | Seita.5G321300.1 | 0.7762  | 0.3115 | 0.4013 |

Table S2 Synonymous values of orthologous *ARF* gene pairs between *S.italica* - *O.sativa* and *S.italica* - *Z.mays*.

| Orthologous gene pairs |                | Ks     |
|------------------------|----------------|--------|
| Seita.1G077200         | Os02g06910     | 0.5015 |
| Seita.1G090900         | Os02g04810     | 0.5124 |
| Seita.1G195500         | Os02g35140     | 0.543  |
| Seita.1G241500         | Os02g41800     | 0.7386 |
| Seita.3G020000         | Os04g57610     | 0.4437 |
| Seita.3G028100         | Os04g56850     | 0.5432 |
| Seita.3G147000         | Os05g48870     | 0.4367 |
| Seita.3G179300         | Os05g48870     | 1.8779 |
| Seita.3G321500         | Os11g32110     | 0.9468 |
| Seita.3G394000         | Os12g41950     | 0.4605 |
| Seita.4G040100         | Os06g09660     | 0.5139 |
| Seita.4G240600         | Os06g48950     | 0.5799 |
| Seita.4G257800         | Os06g47150     | 0.5964 |
| Seita.4G262300         | Os06g46410     | 0.4842 |
| Seita.5G004300         | Os01g13520     | 0.5335 |
| Seita.5G265200         | Os01g48060     | 0.3888 |
| Seita.5G321300         | Os01g54990     | 0.4706 |
| Seita.5G438100         | Os11g32110     | 2.0716 |
| Seita.6G212000         | Os08g40900     | 0.4893 |
| Seita.7G108100         | Os04g36054     | 0.4964 |
| Seita.8G135700         | Os11g32110     | 0.5162 |
| Seita.1G077200         | Zm00001d053819 | 0.3389 |
| Seita.1G090900         | Zm00001d015243 | 0.2615 |
| Seita.1G195500         | Zm00001d016838 | 0.3171 |
| Seita.1G241500         | Zm00001d017284 | 0.6444 |
| Seita.3G003300         | Zm00001d002929 | 0.4236 |
| Seita.3G020000         | Zm00001d026590 | 0.247  |
| Seita.3G028100         | Zm00001d026540 | 0.3965 |
| Seita.3G147000         | Zm00001d043922 | 0.6088 |
| Seita.3G179300         | Zm00001d038698 | 0.3169 |
| Seita.3G321500         | Zm00001d041056 | 0.2785 |
| Seita.3G394000         | Zm00001d041497 | 0.2595 |
| Seita.4G040100         | Zm00001d045026 | 0.2672 |
| Seita.4G240600         | Zm00001d014690 | 0.2717 |
| Seita.4G257800         | Zm00001d014507 | 0.9827 |
| Seita.4G262300         | Zm00001d014377 | 0.3661 |
| Seita.5G004300         | Zm00001d039267 | 0.406  |
| Seita.5G265200         | Zm00001d043922 | 0.2237 |
| Seita.5G321300         | Zm00001d043431 | 0.2343 |

|                |                |        |
|----------------|----------------|--------|
| Seita.5G438100 | Zm00001d011953 | 0.4063 |
| Seita.6G212000 | Zm00001d031522 | 0.3183 |
| Seita.7G108100 | Zm00001d003601 | 0.2192 |
| Seita.7G169600 | Zm00001d017284 | 1.5363 |
| Seita.8G135700 | Zm00001d049295 | 0.3847 |
| Seita.9G219800 | Zm00001d032683 | 0.4262 |

---

Table S3 Primers used in the qRT-PCR assay.

| Gene name      | F(5'-3')              | R(5'-3')              |
|----------------|-----------------------|-----------------------|
| Seita.1G077200 | TCAACCAAAGCGGCATC     | CTGTTTGCCCGACGAA      |
| Seita.1G090900 | CAGCCAACAATAGCCCAT    | TCATCCGAAATCGCATTCTT  |
| Seita.1G195500 | TACAGATCAGCAGCTTGACC  | TTGAGCGTAAACTTCATCGG  |
| Seita.1G241500 | ACCAGCGTCTACTACTTCC   | TTCTCCTGCTCGTCGTCC    |
| Seita.3G003300 | GATTTCTGACACAATGGCAC  | AACCCAACAGTATAGCCATG  |
| Seita.3G020000 | TAGCCCAACGTCATTACCAA  | TCCACACATTTCGAGCTTC   |
| Seita.3G028100 | GTCGCCATTTGTAATTCCT   | TCACTAATTCACGACT      |
| Seita.3G147000 | TTAGCGAAGCTGACCCTA    | TAGTCAGCTCGATCTCCC    |
| Seita.3G179300 | GTCAACCACGTAGGCATC    | TAGTTCGCCATCATTACCTC  |
| Seita.3G321500 | TGACATGCCAACTGTAACCA  | TTGTGCCCTTCCTTGACTG   |
| Seita.3G394000 | CAAACCTCAGCTGGCGTTC   | GTTGTCAATGGCTCAATCTCC |
| Seita.4G040100 | TTGAGCCAGTTGCTACACC   | GCAAAGTCATACCAAGCCA   |
| Seita.4G240600 | ACAGAGTTTGTGTACCGTT   | ATGCCAGTTATTGTACCCAT  |
| Seita.4G257800 | GCGTTCCATTGTACCCAG    | CCATCCGGGAAATAGCAC    |
| Seita.4G262300 | GCCATGCAAAAATACGCTGA  | TCCACTGCAACTCGCTTC    |
| Seita.5G004300 | GCACCTTCTGACTACTGGA   | CAAGGCGTCTCACTCCGA    |
| Seita.5G265200 | TATCTATCGAGGCCAACAC   | GACGCACTCCTAATCGAAG   |
| Seita.5G321300 | TTAAGAGCCTCAACCGTCCA  | ATCAACTTCACTAATGCCAAC |
| Seita.5G438100 | CACATCTTTTCGTGGGCAAC  | ATAGCCCGCCTAACACCAA   |
| Seita.6G212000 | ACACTATTCAGTACCCGACA  | CAAAGAGCGAGTACCCAT    |
| Seita.7G108100 | AGTTGAACCTCGGATAAGCTC | CAACAGCCATTCTTGTCAT   |
| Seita.7G169600 | TTTCGACAACGCTGACCTG   | CACTCCGTATTGTGATCCTC  |
| Seita.8G135700 | TATTCAGAGGTCAGCCACGAA | CCTAACTCCAACACGCAAC   |
| Seita.9G219800 | CCTATCCTTACCGAGCAG    | ATGCAAATAGATGAACCGGAA |
| Actin 2        | GGAATTCAATAAGCACGACAG | TTGTTGTAAATCTCCGGGTT  |
