# Supplementary material for: Whole-Genome Duplication and Purifying Selection Contributes to the Functional Redundancy of Auxin Response Factor (ARF) Genes in Foxtail Millet (Setaria italica L.)
Source: Int J Genomics. 2021 Aug 6;2021:2590665. doi: 10.1155/2021/2590665 (PMC8369178; doi:10.1155/2021/2590665)
Supplement: Supplementary Materials — See Figure S1-S2 and Table S1-S3 in the Supplementary Material 1. Figure S1: the ML phylogenetic tree constructed by ARF proteins from four plant species. Figure S2: intrinsic disorder and transcriptional activity prediction of SiARFs. Green indicated unstructured protein scores. Table S1: synonymous and nonsynonymous values of SiARF WGD duplicate pairs. Table S2: synonymous values of orthologous ARF gene pairs between S. italica and O. sativa and between S. italica and Z. mays. Table S3: primers used in the real-time quantitative PCR assay. See coding sequencing sequences of ARFs of four surveyed species in the Supplementary Material 2. See full-length amino acid sequences of ARFs of four surveyed species in the Supplementary Material 3. [file 2590665.f1.zip]

Archive with 3 entries (3 files):
- Supplementary Material 1.pdf
- Supplementary Material 2.TXT
- Supplementary material 3.TXT
