# Supplementary material for: Whole-Genome Duplication and Purifying Selection Contributes to the Functional Redundancy of Auxin Response Factor (ARF) Genes in Foxtail Millet (Setaria italica L.)
Source: Int J Genomics. 2021 Aug 6;2021:2590665. doi: 10.1155/2021/2590665 (PMC8369178; doi:10.1155/2021/2590665)
Supplement: Supplementary Materials — See Figure S1-S2 and Table S1-S3 in the Supplementary Material 1. Figure S1: the ML phylogenetic tree constructed by ARF proteins from four plant species. Figure S2: intrinsic disorder and transcriptional activity prediction of SiARFs. Green indicated unstructured protein scores. Table S1: synonymous and nonsynonymous values of SiARF WGD duplicate pairs. Table S2: synonymous values of orthologous ARF gene pairs between S. italica and O. sativa and between S. italica and Z. mays. Table S3: primers used in the real-time quantitative PCR assay. See coding sequencing sequences of ARFs of four surveyed species in the Supplementary Material 2. See full-length amino acid sequences of ARFs of four surveyed species in the Supplementary Material 3. [file 2590665.f1.zip › Supplementary Material 2.TXT]

# Si_Os_Zm_At_ARF_cds sequence
>Seita.1G077200.1
ATGAAGCTCTCGCCGTCGGCCGCCGGCGGTCTTCAGGACCAGCCGGCGTCGCCGGAAGAAGCAGAAGAGAACAAGTGCCTAAATTCTGAGTTGTGGCATGCGTGTGCCGGGCCTCTTGTTTCGTTGCCTGCGGTTGGTAGTCGGGTGGTGTATTTTCCTCAAGGCCACGGTGAGCAGGTAGCAGCATCAACCAATAAGGAAATGGAATCTCAGATTCCCAACTATCCTAGCCTTCCTCCGCAGCTTATATGCCAGCTCCATAATGTGACCATGCATGCTGATGCAGAGACAGATGAGGTGTATGCACAGATGACACTGCAGCCACTCAGCCCACAAGAGCTCAAGGACCCATTTCTACCTGCTGAGTTAGGCGGTGCCAGCAAGCAACCAACAAACTACTTTTGCAAGACATTAACTGCGAGTGACACAAGTACACATGGTGGATTCTCAGTTCCCCGCCGAGCAGCAGAGAAGGTGTTTCCTCCACTGGATTTCAATCAGCAGCCACCAGCACAGGAGTTGATTGCAAAAGATCTTCATGGCAATGAGTGGAAATTTCGTCATATATTTCGGGGTCAACCAAAGCGGCATCTTCTGACAACAGGTTGGAGTGTCTTTGTTAGTGCAAAGAGACTGGTCGCTGGAGATTCTGTCCTTTTTATCTGGAATGACAATAACCAGCTGCTTCTGGGCATTCGTCGGGCAAACAGGCCACAAACGGTCATGCCATCATCAGTACTTTCTAGTGATAGCATGCACATTGGTCTGCTGGCTGCAGCAGCTCATGCTGCATCAACAAATAGCCGGTTTACTATTTTCTATAATCCAAGAGCAAGCCCTTGTGAGTTTGTCATACCATTGGCTAAATACGTGAAAGCTGTGTACCATACCCGTATATCTGTGGGTATGCGTTTCCGGATGTTATTTGAGACAGAGGAATCTAGTGTCAGACGATACATGGGGACAATTACAGGAATAAGTGATCTCGATCCTGTTCGCTGGCCGAACTCGCACTGGCGTTCTGTAAAGGTTGGATGGGATGAATCAACTGCTGGAGAGAAGCAGCCAAGGGTGTCTCTTTGGGAGATTGAACCATTGACAACTTTTCCGATGTATCCATCTCCTTTTGCTCTTGGATTAAAGCGTCCATGGCCTACAGGCTTGCCTTCTTTATATGGTGGAAGGGATGATGGCTTGACCTCTTCTCTTATGTGGCTTCGAGACGGCACAAACCCAAGTTTCCAGTCATTGAATTTTGGCGGGCTTGGTACGAGTCCGAGTCCTTGGATGCAGCCGAGGATGGATAATTCCCTACTTGGTCTGCAATCTGACATGTACCAGACCATAGCAGCCGCAGCAGCATTACAGGGCACCACAAAGCAAATCTCACCTTCATTAATGCAGTTCCAGCAGCCGCAGAATATCGTTGGTAGATCTGCTCTCCTATCTAATCAGATTATGCAGCAGGTGCAGCCTCAGTTTCAGCAAATGTACAACCAAAATATCAATGACAACACAGTTCAAGGTCATACTCAAGCTGAGTACCTCCAGCAGCAGCTTCAACGCTGCCACTCATTTAGTGAGCAGAAGCCTCAGCTGCATCCACAGCAACAGCGGCAAGAATCACAGCAGCAGCAGGAATGTGTGCAAACGCCACAGAATCAACAACTGCATTGTTTGCCAAATGCGCTATCAGCTTTCTCTCAGCTTTCTTCAGTCACTCAATCTCCATCTTCCACATTACCAGCAGTTCCAGCATTCTCACATCAACAAAACTTTGCAGACACAAACATCAGCGCTCTCTCACCATCGGGTGGCTCTTCCATGCAAGGCATGTTGGGACAGTTACCATCAGATGCACCTTCGAGCCTCCCATGTGTGGCAAGAAACACCCCTTTATCGATATCTGACCCATGGTCATCTAAGCGAGTTGCAGTGGAGTCTGTTAATCCTTCCCGACCTCATGTTGTTTCGGCCCAGATAGAACAATTGGATATGACGCCATGTAATTTGCCACAAAACTCTGCATTAGCACCATTACCTGGACGAGGGTGCTTAGTGGATCAAGATGAGAGCTCTGATCCTCAAAATCACCTGTTATTTGGTGTTAACATAGACTCACAGTCACTTTTGATGCAAGGTGGCATTCCAGGCCATCAGAATGATAATGATTCAAGCACGATTCCATATTCAACCTCCAATTTCCTGAGCCCTTCTCAGAATGATTTCCCCTTGGGTCAACCACTACCTAGTACAGGCTGCTTAGATGAGTCGAGCTATGTTCCAAGTGCAGAGAATTCCGAGCAAGCAAATCAACAGTTTGCAACCTTTGTGAAGGTTTACAAATCTGGAACCGTTGGAAGGCTGCTCGATATCACTAGATTCAGCAGCTATGATGAGCTTCGTAGTGAGGTGGGGCGTCTATTTGGCCTTGAGGGCCAGTTGGAAGACCCTTTGAGATCAGGCTGGCAGCTTGTATTTGTTGATGGAGAGGACGATGTCCTTTTAGTTGGTGATGACCCGTGGCAGGAATTCGTGAACAGTGTGTCCTGCATAAAGATACTTTCACTGGAGGAGGTTCAGCAGATGGGCAAGCAGGGCATTGAGCTCTTGAGCTCGGCTCCTGCCAGAAGGCTCAGCAATGGTTGTGACAGCTATGTTAGCAGGCAGGAATCAAAAAACCTGAGCACTGGAATGACGCCAGTGGGTTCGGTTGAGTTCTGA
>Seita.1G090900.1
ATGAAGCAGTCCCCGGCGAGCTCTGGTGTCGCTCCCGCGGCCGCGGCCGCCTCCGCCGGCGGGGCGCCACCCGAAGGGGAGCGGAAGGCGCCGGCGATCAACGCGGACCTGTGGTACGCCTGCGCGGGCCCGCTCGTGTCGCTGCCGCCGGTGGGCAGCCTCGTCGTCTACTTCCCGCAGGGCCACAGCGAGCAGGTTGCAGCTTCTATGCAAAAGGATATTGATGCGCATGTGCCAAGCTATCCAAATCTTCCCTCGAAGTTGATATGTCTTCTTCATAGTGTTACTTTGCATGCCGATCCAGACACTGATGAGGTGTATGCGCAGATGACTCTTCAGCCAGTGAACACATATGGAAAAGAGGCCTTACAGCTATCTGAGCTTGCACTAAAACATGCAAGGCCACAGATGGAGTTCTTCTGTAAGACACTTACTGCAAGTGATACAAGTACACATGGAGGTTTCTCTGTGCCTCGCCGTGCTGCTGAGAAGATATTACCTCCACTGGACTTCAACATGCAGCCTCCGGCTCAAGAACTGCAGGCCAGAGACATACATGACACTGTGTGGACATTTCGCCATATATTTCGAGGCCAGCCCAAAAGACATTTACTAACTACTGGCTGGAGCCTTTTTGTGGGTGGCAAGAGACTATTTGCTGGTGATTCTGTCATTTTTGTTAGGGATGAAAGGCAGCAACTTCTACTTGGAATCAGGCGGGCTAGCCGACAACCCACTAATATATCTTCTTCAGTACTTTCAAGTGACAGTATGCACATAGGAGTGCTTGCTGCAGCGGCCCATGCTGCAGCCAACAATAGCCCATTTACCATATTTTACAACCCAAGGGCTAGCCCTACTGAATTTGTCATCCCATTTGCCAAATACCAGAAGGCACTGTATAGTAACCAGATATCTTTAGGAATGCGATTTCGGATGATGTTCGAGACTGAGGAATTAGGGATGAGAAGGTACATGGGTACAATAACTGGGATAAGTGATCTAGATCCTGTTCGATGGAAAAACTCCCAGTGGCGCAACTTACAGGTTGGCTGGGATGAGTCTGCAGCTGGTGAAAGGAGGAACAGAGTTTCAATGTGGGAGATTGAACCAATTGCTGCTCCTTTCTTCATATGCCCTCAGCCTTTCTTTGGTGTAAAGCGCCCTAGGCAATTAGATGACGAGTCATCAGAGATGGAAAACCTTTTCAAGAGGGCAATGCCTTGGCTTGGTGAGGAGATATGCATAAAGGACGCTCAGACCCAGAACACCACAATGCCTGGTCTGAGCTTGGTTCAATGGATGAACATGAACAGACAGCAGAACTCCACATTAGCTAATACAGGCATACAGTCCGAGTACCTGCGATCTCTAAGTAACCCTGCCATGCAAAACCTTGGCGCCACTGAGCTTGCAAGGCAGTTATATGTGCAGAACCATCTTCTGCAACAAAACAGTGCACAGCTTAATGCTTCCAAGCTCCCTCAGCAAATGCAACCTATCAATGAGCTGTCCAAGGGAGTGCTATCGTTTAATCAACTCGATGTTATTACCAATCAAGAACAGAAGCAAGAAGCTGGCAACCAGCAGAGGCAACAGCAGGCCAGTAACCAAGCAATTCCTTTAAGCCAGGCTCAAGCCAGTCTTGCCCAGGCCCAGGTAATTATCCAGAATCAGATGCAGCAGCAACAGCAGCAACATCTGTCTCCAACTAAGAACGAGCAAGGGACCAGTGACCAACAGCTGCTTCTTTCCCAGCAACAGCAGGACCAGAATTTGCAACTACAGCAACATCAGCAGCTTTTACTTCAGCAACTGCAGCGGCAGCAGCAACATAATCAACAGCTAAATAAATTGCCTGGTCAGCTCGTGAATCTGGCTGGTCAGCAGACTCAATTATCTGACCAGGAACTTCAGTTGCAGCTATTGCAGAAACTACAGCAGCAGGCACTCATATCACAGCCAGCGGTTACACTCTCAAGATTACCACTAATACAGGAACAGCAGAAGTTACTTTTGGACATGCAGCAGCTGTCGGGTTCTCGTTCACTTGCGCAGCAGCGGATCATGCCTCAGCAAGATAGCAAAGTTTCACTGCAAGCATCACCATCGCCACCACCAATGAAGCCGGAGCAACAGCAGAAGCTTTCACAGAAACAAGTGGCACTTGCAGATATGTCAGATGTTGCCTTTCCATCGATCACACCAACCAATGTCGTCTCAAAAGCTGGAAGCTCACTGATGATTCCGGGTGCTGCACAATCTGTGCTAACTGAAGAACTTCCTTCTTGCTCAACATCACCTTCTACAGCTAATGGAAATCATTTGGCACACCCAAACATTGGTAGGAATGATCATTGCAAGGTCAACACGGAAAAGGTGCCTCAGTCATCTGCCCTGATGTCAATTCCAACATCTGTTGAAGCTGTAACAGCAGCTCCAGTGATGGCCAAGGAATTGTTGAACCATAATGTGAAGGAGAATGTGATCACCTCAAAGTCACCCACCTGTGGGACTGGTCCTGACAATCTTTTGAACATTGTACCATCAACAGACAACCTGGAAACAGCTTCATCAGCAACTTCATTATGGCCTACCCAAACGGATGGACTTCTGCATCAAGGCTTCCCCACTTCTAACTTCAATCAGCAGCAAATGTTCAAAGATGCACTTCCAGATGTGGAAATTCAAGATGTGGATCCGACTAACAATGCCTTCTTTGGGATCAGTAATGATGGTCCATTGGGCTTTCCTATGGAAACAGAAGGCTTGTTGGTAAGTGCACTTAATCCTGTGAAGTGTCAGACTCATATGTCAACTGATGTTGAGAATAATTACCGAATACAAAAGGATGCTCAGCAAGAGATCTCAACCTCCATGGTTTCACAGTCATTCGGTCAGTCTGATATAGCCTTTAATTCTATCGATTCTGCAATCAACGATGGTGCCTTGTTAAACAGAAATTCTTGGCCCCCTGCACCTCCACCACAGAGAATGCGGACATTCACTAAGGTCTACAAACGTGGAGCTGTTGGCCGGTCCATTGACATTGGCCGGTACGCTGGATATGAAGAATTGAAGCATGCTTTGGCCCGCATGTTTGGTATTGAGGGCCAACTTGAGGACCGACAGAGAATAGGCTGGAAGCTAGTCTACAAGGATCATGAGGATGACATCCTACTTCTTGGTGATGACCCATGGGAGGAGTTTGTGAACTGTGTGAAGTGCATCAGGATCCTATCCCCTCAAGAAGTGCAGCAGATGAGCTTAGATGGTGACTTGGGGAACAATGTCCTCTCCAACCAGGCTTGCAGCAGCTCAGATGGTGGGAACGCCTGGAGGCCTCGCTGTGACCAGAACCCTGGTAACCCTTCCATCGGCTTCTATGACCAATTCGAATGA
>Seita.1G195500.1
ATGGCGAACGCCGGCGCGGGGGCGGGCGGCTCAGGGGGTGTTAGCGATGCTTTGTTCAGGGAACTATGGCATGCATGTGCTGGGCCATTGGTCACAGTGCCTCGCCAAGGCGAGCTGGTTTACTACTTCCCACAGGGTCATATGGAACAGCTTGAAGCATCTACAGATCAGCAGCTTGACCAACACTTACCTTTGTTTAATCTACCATCCAAGATCCTGTGCAAGGTGGTAAATGTAGAACTCAGAGCTGAAACTGATTCCGATGAAGTTTACGCTCAAATTATGCTGCAACCAGAAGCAGATCAAAATGAGCCCACCAGCCCAAATCCTGAGCCACCAGAGCCTGAAAGGTGCAATGTCCATTCCTTCTGCAAGACTTTGACTGCTTCAGACACGAGCACCCATGGTGGGTTCTCTGTCCTCAGGAGGCATGCTGAAGAATGTTTGCCGCAACTGGATATGAGTCAGAATCCACCGTGGCAAGAACTGGTGGCTAAAGATCTCCATGGAAATGAATGGCATTTCCGTCACATCTTTCGAGGTCAACCAAGGAGGCATTTACTTACAACAGGCTGGAGTGTTTTTGTTAGCTCGAAAAGATTGGTTGCTGGTGATGCATTTATCTTTTTGAGAGGTGAGAATGGAGAGCTACGAGTTGGGGTAAGGAGGCTCATGAGGCAATTAACTAACATGCCATCATCGGTTATCTCAAGCCACAGCATGCATCTTGGAGTTCTGGCAACTGCATCTCATGCCATCTCCACTGGAACTCTCTTTTCTGTTTTCTACAAACCCAGAACAAGTCGATCGGAGTTTGTTGTTAGCGTAAACAAGTACCTTGAAGCTAAGAATCACAAGATGTCTGTCGGTATGAGGTTTAAAATGAGATTTGAGGGTGATGAATCTCCTGAAAGAAGATTTAGTGGGACAATTATTGGTCTGGGAAGCATGCCAGCTAACTCAACATCTCCGTGGGCTGACTCTGATTGGAGATCTTTGAAGGTCCAATGGGATGAGCCTTCTGCTGTTCTCCGTCCAGATAGAGTTTCACCATGGGAACTGGAACCCCTTGATGCAACTAACATACAGCCACCTCAGCCTCCTCTACGGAACAAGCGTGCACGGCCTCCTGCTTCACCTTCTATTGCTCCAGAACTTCCTCCAGCTTTTGGTTTTTGGAAATCCCCAGCTGAGCCTACCCATGCTTTCTCATTTTCGGGACTGCAGCGAACTCAGGAATTGTACCATTCAAACCCCAATTCGATCTTTTCGTCACCGTTGAATGAAGGATTCAATTCAAAGAATGAGCGTTCTACTCCAACCAACAATCATTTGTACTGGCCAGTTCGAGACATGAGAACTGAATCCTACTCTGCTAGCATTAACAAACCTCCACCTGAAAGGAAGCAAGAATCTGTTACTGCTGGCTGCAGATTGTTTGGTATTGAGATAAGTAATGCGGTATCACCAGTGGTTACTGCTGCTAGTGTTGGTCAAGACCAACCACCTGCTGTCTCAGTAGATGTTGAGTCTGATCAGCTGTCACAGCCATCCCATGCCAACAAAACAGATGCCCCAGCAGCAAGCAGTGAGCGCTCTCCTCATGAGACTGAGAGCCGGCAAGTCAGGAGCTGCACCAAGGTAATCATGCAAGGAATGGTGGTTGGCAGGGCAGTGGACTTGACAAGGCTAGATGGGTATGATGATCTTCTCCACAAGTTGGAGGAGATGTTTGATATCCAGGGAGAGCTTTCTGCCAGCCTCAAGAAATGGAAGGTTATTTACATGGATGATGAGGATGATATGATGCTGGTCGGGGATGATCCGTGGCATGAATTTTGCATCATGGTGAAAAAGATATACATTTACTCCTACGAGGAGGCCAAGTCTTTGATTCCCAAGGCAAAGCTGCCGGTCATTGGTGACACCATCAAGCCAAACCCAGACAAATTGTCACCGGAATCTGACATGCCGCAGAGTGACTCAAACAACACCGCTCCAGTTGCCGCCGATAAGGACTGA
>Seita.1G241500.1
ATGCAGCTCCACGCGCCGCTCAACAACTGGATCTCGACGCTGTCCCCTACACGAGCCCCTTCACGCTATCCCGGCGCCCTGTCTCCCACTTCCCGCTCGCCGAACGGGGCACTTATAAGCCGGAACGGGGTCGGTTTACTCCTGCTCGTTACCGTGAGAACAGGCGCCAGTTACACACGACACCGACCCGCCCGTCTTCGTCTCCTCCACCTCCGTACCCCGCTCAGCCTCCTCCACCGGCTCTCCCTCGCCGCGGTGCGTGCGTCCCCGATGATCACGTTCGCAGACCTGACGGAGCCGGCCGCGGCCGGCGCCGACCGATGCGTGGACCGGCAGCTGTGGCTGGCCTGCGCGGGCGGGATGTGCACCGTGCCTCCCGTGGGCACCAGCGTCTACTACTTCCCGCAGGGCCACGCGGAGCATGCGCTCGGCCTCGCCGGTGCGGCCGACCTCTCCGCGGCTCGCATCCCGGCGCTGGTCCCCTGCCGCGTCGCCGCCGTGCGATACATGGCCGACCAGGACACCGACGAGGTCTTCGCCAGGATCCGCCTCGTCCCGCTCCGCGCCGGGGAGGCGGACGCCGGCCTCGAGGACGACCCCGCCGCGGACGACGAGCAGGAGAAGCCGGCGTCGTTCGCCAAGACGCTGACGCAGTCCGACGCCAACAACGGCGGCGGCTTCTCCGTGCCGAGGTACTGCGCGGAGACCATCTTCCCGCGGCTCGACTACGCCGCCGACCCGCCTGTGCAGACCGTCGTCGCCAAGGACGTGCACGGGGCCGCGTGGAAGTTCCGCCACATCTACCGTGGCACGCCGCGCCGGCACCTGCTCACCACGGGGTGGAGCACGTTCGTCAACCAGAAGAAGCTCGTCGCGGGCGACTCCATCGTGTTCCTCCGCGGCGACGGCGGGGACCTCCACGTCGGCATCCGCCGCGCCAAGCGTGGGTTCTGCGGCGCCGGCGGGGGCGGGGGCGGAGGCGAGGAAGCACTCCCGATGCCCGGGTGGGACCACTACGCGGGCATGATGCGAGGCAATGTGAGCCCGTGCGGGTCCGCCAAGGCGCGGGGCAAGGTCCGCCCGGAAGACGTGGCTGAGGCAGCGAGGCTGGCGAGCGCCGGCCAGCCGTTCGAGGTGGTGTACTACCCGCGCGCGAGCACGCCGGAGTTCTGCGTGCGCGTCGCGTCGGTCCGCGCGGCGATGCGGGTTCAGTGGTCGCCGGGGATGCGGTTCAAGATGGCGTTCGAGACCGAGGACTCCACCCGGATCAGCTGGTTCATGGGCACCGTCGCCGGCGTCCAGGTCGCTGACCCCATCCGCTGGCCTCAGTCGCCGTGGCGCCTCCTTCAGGTGACCTGGGACGAGCCGGACCTCCTGCAGAACGTGAAGCGGGTGAGCCCGTGGCTGGTGGAGCTCGTCTCGAGCATTCCGGCCATCCACCTCGCCTCCTTCTCGCCGCCGCGGAAGAAGCCACGCATCCCGGCGTACCCGGAGTTCCCCTTCGAGGGACAGCTCCTCAACCCGGCATTCCCGCCCACCCCACTGTCGCACGGCCACCACGGCCACCACTACCTCCACACCCACCCGTCCTTCTTCCCGTTCCCGGACGGCAGTGCTCCTGCAGCCATACAGGGAGCCAGGCATGCGCAATTTGTTCCACCTTTATCAGATCTCCACCTTACCCACCTGCAGTCGAGCCTGCTGTACCCCGGCCTCCGCCGTCCCGATCACGTCGGTCGGGCGGCTCCCATCCCGGCAAGAATCAGCACCGACCTGACCATCGGCGGCGCGCCGGCGCGCGACGACATGTCGTGCGCGCTGTCCATCGGCGCCGACAAGAAGCAGCCCGGCGGCGCCAAGCCGGCGGGGCTAGTGCTGTTCGGGCGGACCATACTGACCGAGCAGCAGATGAGCCTCAGCGGCTCCGCCGGCGCGACCTCTCCGGCGGCGACCGGGAACGGCTACATGAACTGGAACGCCGACAAGGGCCCCAACGCCTCGGAGGGCTCGGGCTCCGGCGTCATCCAGAACAGCCCGACCAAGAACGCGTCGTCGTCGGAGCGGCCTCCGTGGTTCACCGAGCTTGCCGGGCTGGAGCCCGGGCAGTGCAAGGTGTTCGTCGAGTCCGACACGGTCGGCCGCAACCTCGATCTCTCGGCGCTGGGATCGTTCGACGAGCTCTACGGCCGCCTGTCCGAGATGTTCTGTATCGAGAGCGCGGAGCTGCGAAGCCGCGTGCTCTACCGCGGCGCCGCCGGCGACGTGAAGCACGCCGGCGATGAGCCGTTCAGCGTTTTCGTCAAGTCGGCACGGAGGATCACCATTCTAACCGACGCTGGGAGCGACAACCTAGGGAGCTAA
>Seita.3G003300.1
ATGGCGCACCACCAGCCGCCCCCCGCCGCCGCCGACGACCCCATCGTCGACCGCGACGTCTGGCTCGCCTGCGCCATCCCGCTCTCCCGCCTCCCCGTCGTCGGCGCCCAGGTCTACTACTTCCCCCACGGCCACGCCGAGCAGTGCCCCGACCACCTGCCGGCGCCGCTCCCCACGCCGCACCTCTTCCCCTGCACCGTCACCGCCGTCGGACTCGGCGCCGACGACAAGACCAACGAGGTGTTCGCCCAAATCTCCCTCCAGCCGGGCCCCCACCGCGGGCCCCCGCCGCCCGCGCCCGACGCCGCCGACCTCAACCTCAGCTTCTTCGCCAAGCAGCTCACGCAGAGCGACGCCAACAACGGCGGCGGCTTCTCCGTCCCGCGCCACTGCGCCGACCACATCTTCCCCAAGCTCCGCTTCGAGGACGATCCGCCCGTGCAGAATCTCGTCATGCGGGACCCCGTCGGCGACCACTGGCAGTTCCGTCACATCTACCGCGGCACGCCGCGCCGCCACCTGCTCACCACCGGCTGGAGCAAGTTCGTCAACGCCAAGCTTCTCGTCGCAGGGGACACCGTCGTCTTCATGCGCCGCCCCGACGGCGAGCTCCTCATCGGCCTGCGCCGCGCACCCAGGTACCCCGTCGTCGCCAGGGCCGCCGACCAGCCGCCGCCGTGCAACGCGCGCGCGAGGGTGCCGCCCGGGGACGTCATGGAGGCGGCGCGCCTCGCCGCGGAGGGCAGCCCATTCACCGTCAACTACTTCCCGCGCCAGGGCGCCGCCGAGTTCGTCGTGCCGCGAAAGGAGGTGGAGGACGCGCTCGCCAGCCGCTGGGAGCCAGGCACGCAGGTGCGCATGCAGGTCATGGAGGCCGAGGACGCGCGCCGCACCGAGTGGGCCAACGGCACCCTCAACAAGCTCCACCCAAACATATGGCGAGCGCTCGAGATTGACTGGGATGACTCCTCGCCATTCTCACTAACCAGGAGCAGATATGTAAATGCTTGGCAAGTCCAGTTTGTTTCATTTCCTCCTCTTCTGAAGAGGCTGAGGATTTCTGACACAATGGCACCTCTGTGCTCTGGAGATGTCTCTTCCTTGGCTGCTCCACTGATCGGACCGGAAAGCCAGGCCATGGCTATACTGTTGGGTTCACCAATTCCTGCTGGCATGCAGGGAGCCAGGCATGATGTACCACCCTCTTCATCAACTCTGGGAATGCTCACAACTCAGCTGCTGTTCCCCCAGCTTAGCAGCGACCTTCAGATGCCACCGAGCGTGAATAGCGGTGGCTCCTCTGAGATTTTGGATCCTGAAACTGGTTCTCCTCCCAACAACTCTGTTAACATGCCTCCAGCTGAGCTTCCTGTTGAAGCGAAGGGCATACAACTCTTCGGCGCCACAATCAATCCGCATGTTGTGCAACGTGCTACAAATGGCGCTTCCGAAGAAGTGAATGGAGCTATTAATGGTGTGGTTGATGAAAATGTTGGAAAAGATCTGTAA
>Seita.3G020000.1
ATGAGCTCGTCGTCCGCGGCCAGCATCGGGCAGCCGCCGCCGCCCGCGGCGCCGCCGGAGGAAGAGAAGAAGTGCCTCAACTCGGAGCTGTGGCATGCGTGCGCCGGCCCGCTCGTCTGCCTCCCGACCGTCGGCACGCGCGTCATCTACTTCCCGCAGGGCCACAGCGAGCAGGTGGCAGCGTCGACGAACAAGGAGGTGGACGGCCACATCCCCAACTACCCCAACCTGCCGCCGCAGCTGATCTGCCAGCTCCATGATGTCACAATGCATGCGGATGTGGAGACTGATGAGGTGTACGCGCAGATGACGCTGCAGCCGCTGAACCCACAAGAGCAGAACGATGCATACCTCCCGGCGGAGATGGGGATCATGAGCAAGCAGCCAACGAATTACTTCTGCAAGACGCTGACGGCGAGCGACACCAGCACGCATGGCGGGTTCTCTGTGCCCCGTCGTGCTGCGGAGCGCGTCTTCCCTCCTCTGGATTTCACACAGCAGCCTCCAGCACAGGAGCTTATCGCACGGGATATTCATGATGTAGAGTGGAAGTTCAGGCATATCTTCCGAGGCCAACCCAAGAGACACCTGCTGACTACTGGCTGGAGTGTGTTTGTCAGTGCTAAGAGACTTGTTGCTGGAGATTCCGTGCTATTCATATGGAATGAGAAGAACCAGCTTTTGCTTGGAATCAGACGTGCCAGCCAGCCACAGACTGTGATGCCCTCTTCTGTTCTTTCGAGTGACAGCATGCACATAGGGCTCCTTGCAGCAGCAGCTCATGCTGCTGCAACAAACAGCCGCTTCACAATTTTCTATAATCCCAGGGCAAGTCCATCAGAATTTGTTATACCCCTTTCAAAATACATCAAGGCTGTTTTCCACACCCGGATATCGGTTGGGATGCGATTCAGGATGTTGTTTGAGACTGAGGAATCTAGTGTCCGCAGGTACATGGGGACGATAACAGAAGTAAGTGATGCAGACCCAGTGCGCTGGCCTAGTTCCTATTGGAGATCGGTAAAGGTTGGTTGGGATGAATCAACAGCAGGAGAAAGGCCACCTAGAGTTTCTCTCTGGGAAATTGAGCCATTGACAACCTTTCCAATGTATCCATCCCTGTTCCCACTGCGAGTTAAGCATCCTTGGTATTCTGGAGTTGCTGCTCTTCATGATGACAGCAATGCTTTGATGTGGCTGAGAGGAGTTGCTGGTGAAGGAGGCTTCCAGTCTTTCAACTTCCAGTCACCTGGTATAGGTTCCTGGGGACAACAGCGACTCCATCCATCCTTACTTAGCAATGACCACGATCAGTATCAAGCAGTGGTTGCTGCTGCAGCTGCTTCCCAGTCCGGTGGTTATCTGAAGCAGCAATTCCTACACCTTCAACAGCCTATGCAGTCCCCTCAGGAACAGTGCAACCTCAACCCGCTGCTGCAGCAACAGATTATGCAGCAAGCGAGCCAACAGCAACTTGTTAGTCCTGATTCTCAAAATATTCAGTCTGTGCTCAGCCCAAGTGCTATCCAGCAGCAGCTCCACCAACTCCAGCAAATGCAGCATGCTCATAATGACCAGAAGCAGAAGATTCAACCAGATCAACCTTATCAAGTTCCTACCAGTGCGGTTCTCCCTAGCCCAACGTCATTACCAAGCCATTTGCGTGAAAAATTTGGCTTCTCTGATCCCAATGTGAACTCTTCCAGCTTCATTAGCTCTAGCAGCAACGAAAACATGTTGGAATCGAACTTCCTTCAGGGAAGCTCGAAATGTGTGGACCTGTCTAGATTCAACCAACCAACAGTTAGTGAGCAGCAGCAGCAGCAACAGGCGTGGAAGCAAAAGTTTATGGGCTCACAATCAATGTCTTTTGGGGGCTCGGTTTCGCTTAACTCACCCACTAGCAAAGATGGTTCTGTTGACAACAAAGTTGGCCGTGATGTGCAGAACCAGTCCCTTTTTAGTCCTCAAGTTGACAATTCCTCCCTACTGTACAATATGGTACCTAATCTGACTTCAAATGTTGTGGATAACAATATATCTACGATTCCCTCTGGATCAACATATCTGCAAAATCCGATGTACGGTTGTCTGGATGACTCTTCTGGTTTGTTGCAAAATACAGGAGAGAATGACCCAACAACCAGAACTTTCGTTAAGGTTTACAAGTCAGGATCAGTGGGGAGGTCATTGGACATCACCCGGTTCTCTAACTATGCTGAACTTCGAGAGGAACTGGGTCAGATGTTTGGTATTAAGGGTCAGTTGGACGACCCTGATAGATCAGGCTGGCAGCTTGTATTTGTCGACAGGGAGAACGATGTGCTTCTCCTTGGAGACGACCCGTGGGAGTCATTTGTGAATAGTGTGTGGTACATCAAGATACTTTCACCTGAGGATGTGCATAAGATGGGAAAGCAAGGAAACGATCCACGCTACCTATCTTAA
>Seita.3G028100.1
ATGGCGTCCTCGCAGGAGAAGGCCACGTCGGGTGTCCTGAGGAACGCGGCGGCGCTGCTCGACGAAATGCAGCTCATGGGAGAGACGCAGGGTGCGAAGAAGGTGATCAACTCCGAGCTCTGGCATGCCTGCGCGGGGCCGCTGGTGTGCCTGCCGCAGCGGGGGAGCCTCGTCTACTACTTCCCCCAGGGGCACAGCGAGCAGGTTGCGGCTACCACTAAAAAGGTTCCGAATTCTCGCATCCCGAACTACCCGAGCCTCCCGTCCCAGCTGCTATGTCAAGTCCACAACATTACTTTGCATGCTGACAAGGAAACTGATGAGATTTATGCTCAGATGACCCTTCAACCAGTGCACTCTGAAACTGAAGTCTTCCCAATTCCATCTCTTGGCGCGTACACCAAAAGCAAGCATCCCACAGAATATTTCTGCAAAAATTTGACAGCAAGTGATACAAGTACACATGGTGGTTTCTCAGTGCCACGAAGGGCTGCAGAGAAGTTGTTCCCACAACTTGATTACTCAATGCAGCCTCCTAATCAAGAACTTATTGTTCGAGATTTGCATGATAACCTGTGGACATTTCGTCACATTTATCGTGGGCAGCCAAAGAGACATCTTCTAACAACTGGATGGAGTCTTTTTGTTGGGGCGAAACGGCTTAAAGCAGGGGATTCTGTCTTATTTATCAGGGATGAGAAGTCACAACTCCTTGTGGGTGTTAGGCGGGCCACCCGACAACAGCCGGCTTTGTCATCATCTGTCTTGTCTACTGATAGTATGCACATAGGCGTTCTTGCTGCTGCGGCTCATGCAGCGTCAAGTGGTGGCTCATTTACTATTTACTACAATCCTCGGACAAGTCCGTCGCCATTTGTAATTCCTCTTGCAAGGTACAATAAGGCCACATATATGCAACCATCAGTTGGAATGAGGTTTGCAACGATGTTTGAGACAGAGGAGTCAAGCAAGCGCAGATGCACCGGTACAGTCGTGGGAATTAGTGACTACGATCCAATGCGATGGCCAAACTCAAAATGGCGCAACTTGCAGGTAGAATGGGATGAACATGGGTATGGAGAAAGACCTGAAAGAGTTAGCCTATGGGATATCGAAACTCCAGAGAACTCTCTGGTCTTCTCTTCTCCATTGAATTCGAAGAGGCAATGTCTTCCCAGTTATGGAGTTCCCGGGCTACAAATTGGATCTGTAAATATGTCATCAATTCCAAGGGCACAAGGAAATCCTTTTGGTAACTTGCAACACATGCCAGGGATTGGATCAGAATTGGCTTTGATGCTTCTAAATCAATCTGGCCAAAACCTTGGGAGTCCGCTTGCTTGTCAGCAATCCTCATTCTCTAGTATCATTCAAAATGTTAACCACGGCTATATCCCTCCATCGACATTTGGTGCTTCCACTGGTTCAATAAAGCAAGAAAGCATGCTCTCAAATGAAGCCCAACAGCAGTTGAGTGCTCCTAATATTCAGAAAGATGATCAGCAAGGTATTGATTCAACTTCTGCACAGGAGTTAGATGTTAGAGCAAGAGGGCCAAGAAACACAGATTCATACTCAAGTCAAAGTATTTCGGATCAAAACAGCAAGGGTGAGCATAGAACTAAAACTCGAAGGAGCAAGAAGGGCTTGTCTCACAAATCCATTTCAGATAAATCTGAGCTTTCTTCAGTGCCTTCTCAGATTTGTGATGACCAGCGGCATGGTTCAGAACCAAAATTGGTTGATTGTGAAACCGAGCAAGTTAACTGTGGAAATAATGAAGATTCATCCGGTGCACTTACTCGAGGTGGTTTTGCTGGAGAACCGCAAGTTCAGCAGGTTGAACAACATGAACTACTGGCACCACCAAAGTTCGAACCATCAAAGTCACCTGATGGAGGGAAGTCAGTCAGCTCATTTCCAAACCAAGGGTGTTCGCCGCAGTTCTTTGAGGGTCTGGATTGGGTGATTCAGCCTTCCTATTACCAGGACTCCAATGGCATCCATTCAGTTAGTGCATCAGAGAACATTTTCAATCAATCTGCAGATATAACTTCCACTATAAATGCTGATACCATGGAGGCATTTCAAAACTCTTGCCTTTCAGAGTGCTTTCCCAATTCCGTCCAGGAGTTTATCAGCAGCCCAGATCTAAATTCTCTAACATTTATGTCGCCTGACATGCAACATTTGGATGGTCAACATGATGTGAACAACCTACCAAGCACATCCAACTCATATGTGCAAATGAGTTACTCAGAGGAGAGTGGAAATCAGAGTGCATCGTTAAGTGGCCTGCACATGGAAGCTATCCATATAAACAGCTCATGCTCTGAACCAATGACAACTGGGAGCTTTGATGCAGGAATGTTCTCAAAGCTACCAAATTTAAGAGATTCCCAAGTATTGCCTCTGCAGGAGATCCATAACAGTTCCATGGGAACACCTTCCTGCAGTATGGATGCAGCAAGTGTGAAACCGATAAAACCGCCTGTCCGGACATATACTAAGGTTCAAAAGCTGGGATCAGTTGGAAGATCTATTGATGTTACACGGTTTAGAGATTACCATGAGTTGAGGTCAGCCATTGCGTGCATGTTTGGGCTCCAGGGGAAACTGGAACATCCTGGCAGTTCAGACTGGAAGCTTGTTTATGTTGACTACGAGAACGATGTTCTTCTCGTTGGAGACGATCCATGGGAGGAATTCATCAACTGTGTCAGATGCATCCGGATTTTATCGCCTTCAGAAGTACAGCAGATGAGCGAGAATGGCGTACATGTCCTGAATGACTGTATTCAAATAGCTCAGTAA
>Seita.3G147000.1
GAGGTCGCGAGGCGGCTGCGCGGAGGGTCGGAGGACGGGAGCGGCGGCGACGGCGAGGACGGGGACACCGTGAAGCAGCGGTTCTCGCGGATGCCGCACATGTTCTGCAAGACGCTCACGGCCTCCGACACCAGCACGCACGGCGGCTTCTCCGTGCCGCGCCGCGCCGCCGAGGACTGCTTCCCGCCTCTGGATTACAGCCAGCAGCGGCCGTCGCAGGAGCTTGTCGCCAAGGATTTGCACGGAACAGAGTGGAGGTTCCGCCACATCTATCGAGGCCAGCCCCGCAGGCACCTTTTAACCACTGGATGGAGTGCATTTGTCAACAAGAAGAAGCTAGTCTCAGGGGATGCCGTACTATTTCTGCGGGGAGATGATGGGGAGCTGAGACTTGGAGTGCGCCGTGCAGCTCAGCTTAAAAATGGATCTGCTTTTCCAGCGCTTTATAATCAGTGTTCAAATCTTGGTTCTCTAGCCAATGTAGCACATGCTGTTGCCACGAAAAGTGTGTTTCACATCTACTATAACCCCAGATTAAGTCAATCTGAATTCATTATACCATACTCGAAGTTCATGAAGAGCTTCAGCCAACCATTTTCTGCTGGGTTGAGGTTCAAAATGAGATATGAGAGTGATGACGCTACGGAAAGAAGATACACTGGGATCATAGCAGGAATTAGCGAAGCTGACCCTATGTGGCGTGGTTCAAAGTGGAAATGTTTGATGGTTAGATGGGATGATGATGTAGATTTCCGTCGACCAAACAGGATTTCTCCTTGGGAGATCGAGCTGACTAGCTCAGTTTCAGGATCCCATCTGTCTGCACCAAATGCGAAGAGGCTGAAACCATGTCTTCCCCATGTCAATCCAGACTACCTAGTTCCAAATGGAAGTGGTCGTCCTGATTTTGCGGAATCTGCCCAATTCCACAAGGTCTTGCAAGGTCAAGAATTATTGGGTTATAGAACTCATGACAATGCTGCTGTTGCTACTTCTCAGCCATGTGAAGCAAGGAATATGCAGTACATTGATGAGCGTAGTTGCTCCAATGATGCGAGTAACAGTATCCCGGGGGTTCCAAGACTTGGTGTCAGAACACCACTAGGAAGCCCTGGGTTTTCCTACCATTGCTCAGGCTTTGGGGAGTCTCAAAGATTCCAAAAGGTCTTGCAAGGTCAAGAAGTATTTCGTCCGTACCGAGGAAGTCTAGTTGACGCGTGTTTGAGAAATAATGCCTTCCATCCACAAGACGGTTCTCATGCGCCTAGTGCGGTGAATAAATGGCATACACAACTTCATGGATGTGCTTTTCGGGGGCCACAAGCACCAATGCTTCCATCTCAATCCTCATCTCCACCATCTGTCCTTATGTTTCAACGAGGTAATTCGAAGATATCCCGGTTTGAATTTGGGCATGGTTCCTTGGATAAAAATGAGGATGATAGACCTGCTATGTTTGGCCATGATGGAGGTATTGGAGGAACTGAGCAATCATTGATGCTCCAGCCTCATCATGATTCTGGGGAAGTGAGAAATAGGCATGTGACAGTTGAGAAATTTCACTCCACTGTTGCTGCCAGGAAGGATGGGCCAGATAACAGGGAAGTTAACACAAATAGTTGCAAAATATTTGGCATATCTTTGACTGAGAAGGTTCCAGCAAACAAAGAAAAGGACTCTGGTGATGTCAATTATCCATCCCCATTCCTGTCTTTGAAGCAACAAGTGCCAAAATCACTGGGCAACAGTTGTGCAACTGTTCATGAGCAAAGGCCTGTTGTTGGCAGGGTGATTGATGTTTCAACCATGGACATGATGATCTGA
>Seita.3G179300.1
ATGGGGATCGATCTCAACGCCGTGGAGGAGGACGAGCTGGCGGGGCCGGCGGTGTGCGGGGAGCTGTGGCACGCGTGCGCGGGGGCGGGGGTGGCGCTGCCGCGGCGGGGCGGCGCCGTCGTGTACCTGCCGCAGGCGCACCTCGCGGCGGCGGGCGACGGCGGGGAGGTGCCGGCCAGTGCCGCGGCGCGCGTCCCGCCGCACGTCGCGTGCCGCGTCGTCGACGTCGAGCTATGCGCGGATGCGGCGACGGACGAGGTGTACGCGCGGCTCGCTCTGGTGGCAGAGGGCAAAATGTTTGGCCGAAACAACCATGATCGTGAAACTGAAGTGAATTGTGAGATGGAGGATGGTGATGGAGGAAAGAAGCTACGAACGTCACACATGTTCTGCAAGACACTCACAGCTTCTGATACAAGCACACATGGAGGATTCTCTGTTCCTCGGCGTGCTGCTGAGGACTGCTTTCCACCATTGGACTACGAGCAGCTTAGGCCTTCCCAAGAGCTCATTGCCAAGGACTTACATGGCATGAAATGGAGGTTCCGGCATATCTATAGAGGTCAACCACGTAGGCATCTTCTGACAACTGGATGGAGTTCATTTATCAATAAGAAGAAATTAGTCTCAGGGGATGCGGTCTTGTTTCTTAGAGGTAATGATGGCGAACTAAGATTGGGTGTAAGGAGAGCAGTTCCATTGAAAAATGAGCTTCTTCTTGAAGCTGTCAACAGTACCGATTCAAAGCTACGTACACTGTCTGCCGTGGCCAGTTCCTTGGAGAACAGAAGTATATTTCACATATGTTTCAATCCAAGGACTGGTGCGTCAGAATTCATTGTGTCATATGGAAAATTCTTGAAGGGCTTGAACTATCCCTTTTCGACTGGGATGAGGTTTAAAGTTGGTTTTGAGAACGAAGATGCTAACCAGAGGTCTCATGGATTGATCTCAGGTATTAGTGAAGTTGATCCCATACGCTGGCCTGGATCAAAATGGAGATGTCTCCTGGTTAAATGGGATGATGATACTAAGTGCAACCACAGGAACAGAGTATCTCCATGGGATATCGAGGGCATTAGCAGCTCAATTTCAATGACTAATTGTCTTTCATCTGTTTCGAAGCGAACAAAATTGTGCTTCCCTCAAGGTGATTTGGATGCACCAATTCTAGATGGAAATGGTCGTCCGGACTCCATGGAAACTGAATGTTTCCACCGGGTCTTGCAAGGTCAAGAATTGGTGCGCACCCGGACTCATGGTGTTGCATGGTCTCATTCATCAGATACCCCCAAATGCCAAGGCTCTTGTGAAAGGAGATTCTCTGCTGATGTGTGGAACTGCAAGATGAATGATGCAATGAGTGGGTTCCGGCACCGAAATGCCAATGGGTTTGCTTACCAGCCCCTAGGCTTCAGTGAATCTGTCAGATTCTCAGAGGTCTTGCAAGGTCAAGAAATGTCTCAGGCGGTTCCTTCCTTCCTTGGAGCTGCTTTAGATGCTCGCGTACAGAATGGCAGAATTGGCTCGTTCGATTACGTGCATAGATCAACTGTTAGTCAAGGCTATCCTCTCCAGCAATTTAATCTGCCAGCAACAGAAGTGCATTCACCCTCTTCTGTTCTTATGGTTAATCAAACCACGGCACTACAACCTGAGTTAGAAGGTATGACCAACCGTGAAGAAGCAAATGGCAGCCGATACGCGCCCATTGCAGTGCGGAGAGAAGCTGAAAGGTGGCCATCTACACAGCAGCCAAGGGCAAGTGGAAATGGAAGCGAGGTTTTCAACACAACTGAAGCCTCAGCTCCAGCAACTGCTGCTAAGCCCGTCGACAGGGGAGTCGGGAGAAGCAGCTGCAGGCTTTTCGGATTCTCCTTGACGGACAAGATCCTGGGAGCAGAGGAGGATGGTGTGAAGGAAGGGAACTACGAAGCGGATCATCAGACCCCACGGGCGCTGGACTTGTTTGGGCACAGCCAATCTGCACCCAGTGCTCTGCATGCTCTCTGCGCAGCTCCCTTGGGAATCTGA
>Seita.3G321500.1
ATGGCGGCGGCGGCCGGCGGCGGTGGAGGTGGATGGGGAGGTCCGGAGGCAGGAGGCGGCGGAGGCGGAGAGAAGGACGCGCTGTTCGTGGAGCTGTGGAAGGCCTGCGCGGGGCCGGTCTCCAGCATCCCGCCGCTCGGGGAGAAGGTCTACTACTTCCCGCAGGGGCACATCGAGCAGGTGGAGGCGTCGACGAACCAGCTTGCTGAGCAGCAGGGCACACCGCTCTACAACCTGCCATGGAAGATCCCCTGCAAGCTCATGAACATCGAGCTGAAGGCGGAGCCAGATACTGATGAGGTGTACGCTCAGCTCACCCTGCTCCCTGATAAGAAGCGAGATGAGAATACCACTACAACAGTGGAGAGTGATGCTGCAGAGGATGAGGTCGTGCCTGTTGCACCACCAGCCACCAATGAGCAGCTTCTCATCCATTCCTTCTGCAAGACACTGACTGCCTCAGACACAAGCACGCATGGTGGATTCTCGGTGCTGCGTCGGCATGCGGATGAGTGCCTCCCTCCACTGGATATGAGTCAGCATCCTCCAAATCAAGAACTGGTGGCCAAGGACCTGCATGGGGTCGAGTGGCGCTTTCGTCACATCTTTCGAGGTCAGCCACGTAGACACCTTCTTCAGAGTGGTTGGAGTGTTTTTGTTAGCGCCAAGCGTCTTGTTGCTGGTGATGCCTTCATATTTCTCAGAGGTGAGAATGGGGAGCTACGTGTTGGAGTTCGGCGGGCACTCAGGCACCAAACCACCATCCCATCTTCGGTCATATCAAGCCACAGTATGCATCTTGGTGTTCTTGCAACAGCATGGCATGCAGTGAACACTGGGAGTATGTTCACTATCTACTACAAGCCAAGGACTAGTCCAGCTGAATTTGTGGTCTCGCGCGATAGGTACTATGAATCACTGAAACAAAATTATACAATAGGGATGAGATTTAAGATGAGATTTGAAGGTGAAGAGGCGGCAGAGCAAAAATTCACTGGAACAATAGTTGGAATAGGTGCTTCTGATCCGTCTGGATGGGCTGACTCCAAATGGCGTTCCCTTAAGGTGCGATGGGATGAAGCTTCTGCTGTTCTTCGTCCGGAAAGAGTCTCTCCTTGGCAAATAGAACCTGCTGCTGTTAGCCCATCTCCTGTGAACCCTCTTCCACTCAGATTCAAGAGGTCTCGTTCAAATGTTAATGCTTCGCCATCTGACATGCCAACTGTAACCAGAGAAGTTGCTTCTAAAGTCATGGCGGACTCTCAACAAAACAGTCTCCCAAGGGCCTTGCACAGTCAAGGAAGGGCACAATTGACTAGTCGATTCCGTGATAGCAGTGATCTGAAGTCCGCTCAGGATCTCACCATGTGGTCTTCAGGAATTGAGCAAGAGAGAAACAATATTGCTGCCCAGACAAAGCTAAGTCTAGAGGGTTGGACGCAAACAAGAAGACCTGAGGGTTACAATCAGCTGTCATCGGCATTTCAACCACTGAAAGATGCGCAGAATCCACTTTGTTCTTTTCCTAGTCAAATATCTGGAAACCACTCAAATACCTGGGACACAGTTGATGCTCATTATCCAACCCAACAAGCAAACCACAACATGCTACCTGGCACATGGTCTTTAATGCCTCATAACTCTGGTTTTATGATGAATCAACAAAATTATCTGTCAATGCCTGAAGCTGCACTTCCTCAAAGGGCTGAAATTGCAAAATTTAGTGGGAAATCAGCTTTCACTTCGCTTCAGGGCCATGGCATTGATCGGTGCTGCTCAGGCTGGATTGGCCATAATCGTGCATCATCGAGTTTGATCAATCCCCGGCCTTTGGTTATTGAAACTGATGTCCAGAAAACCAAAGGCACTTCATTCAAGCTATTTGGGTTTCCTCTTGGTAGCCCAGAAAAATCTGAACCTCTGGTATCCCCACCAAGTGTTGCATATGACGGAAAGCTTCAAACATCTCCATCACAAAGGAATCAGCTAGACATAATTGAAGTGGATGATTATTCTGATCCTTCGAAGACTGTTAAGCCTCTTGATGGTCCTCAGACAGATTCTGTTAGGGAGAATAATCATCCTTGCCCAGAGGCTACCCAGAATGTTCAGAACAAAGTGCAAAGTAGTTCCACCCGAAGCTGCAAGAAGGTGCATAAGCAAGGCAGTGCCCTCGGCAGGTCGATTGATCTGACAAAGTTCACTTGCTACAGTGAACTAATTGCTGAACTGGATCAGATGTTTGACTTTGGTGGTGAGCTGAGCAGTCCTCACAAGAACTGGATGGTTGTCTTCACTGACAATGAAGGTGACATGATGCTGGTTGGTGATGATCCCTGGAACGAGTTCTGCAGCATGGTCCACAAGATGTTCATCTACACAAGGGAGGAGGTGGAAAGGATGAACCCTGGCGCCCTGAGCTCCAGGTCCGAAGAAACTCTGTCTGACTCGCTGGTGAGAGGATCGGGTTCCAAGGAGCCCCGAGGTGGGCCATCCGCTTTGTCTCTCAACTCCGAGAACTGCTAG
>Seita.3G394000.1
ATGAATCTCTCCCCGTCCAAGATGCCGGAGCCCTCGCCGGAAAGTGATGGGGAACAAAGGTGTCTGAACTCCGAGCTATGGCATGCATGCGCTGGGCCCCTTGTGTCCTTGCCTATGGTTGGGAGCCGGGTCGTCTACTTTCCTCAGGGCCATAGTGAGCAGGTTGCTGCATCAACTAATAAAGAAGTTGATGCTCAGATCCCGAACTACCCAAATCTACCTCCGCAGTTAATCTGCCAGCTTCATAATGTCACCATGCATGCTGATGCAGAGACTGAAGAAGTTTATGCCCAGATGACACTGCAACCATTGAGTCCGGAAGAGCAAAAGGAACCTTTTCTTCCGATTGAATTGGGTGCTGGTAGCAAGCAGCCAACTAATTACTTCTGCAAGACATTGACTGCAAGTGATACAAGTACTCATGGTGGATTCTCTGTTCCGCGCCGAGCAGCTGAGAAAGTCTTCCCCCCACTGGATTTTTCACAACAACCTCCAGTGCAGGAGCTGATTGCAAGAGATCTGCATGACAACGAGTGGAAATTTCGCCACATTTTTCGTGGTCAGCCAAAAAGGCATCTCCTGACGACGGGCTGGAGTGTATTTGTAAGTGCGAAAAGACTAGTAGCAGGGGATTCTATCATATTTATCTGGAACGACAATAACCAACTTCTTTTGGGAATTCGTCGTGCAAATCGTCCACAGACTGTTATGCCCTCGTCTGTGCTATCAAGCGATAGCATGCATATTGGTCTTCTTGCAGCAGCAGCTCATGCTGCAGCCACAAACAGTCGTTTCACTATTTTCTATAATCCTCGGGCTAGCCCTTCTGAGTTTGTCATTCCACTGGCTAAGTATGTGAAAGCTGTTTACCACACACGTGTGTCTGTTGGAATGCGATTCCGTATGCTTTTTGAGACAGAGGAATCAAGTGTCAGACGATACATGGGTACGATCACAGGCATAAGTGATCTGGACTCAGAGCGATGGCCAAACTCACACTGGCGTTCTGTGAAGGTTGGTTGGGATGAGTCTACAGCTGGTGATAAGCAACCAAGGGTTTCACTCTGGGAGATTGAGCCATTGACAACCTTTCCGATGTACCCTACTGCTTTTCCTTTAAGACTTAAGCGCCCGTGGGCTTCGGGACTGCCCATGTTCAATGGCGGGAGGAGTGATGAGTTTGCTCGTTATTCTTCTCTCATGTGGCTTCGAGATGGAAACAGAGGGGCCCAGTCTTTGAACTTCCAGGGATTTGGAGTGTCACCATGGCTTCAGCCGAGAATAGATTATCCATTGCTGGGTCTGAAGCCAGATACTTACCAGCAGATGGCTGCTGCTGCACTGGAAGAAATTAGAGGTGGGGATCATTTGAAGCAGACATCTTCTCTATTGCCAGTCCAACAGGCTCAAAATTTGAATGGTGGATTAGATCCTCTGTATGGAAATCCTGTTCTACAGCAGATGCAGTTCCAATCTCAGCAGCCACCCCTGCAAGCTGTGCAGCAAGGTTATGGCCAGAACACAGGCAACTCTGGGTTCCTTCAAAGTCAGCTACAGCAGCTGCAGCTGCAAAAGCAGCAGGAGTCAGCACCACAGCAGCAGCAGCAAACACAGCAAGTTCTGCAACAACAATCTCATCAGGATATGCAACAGCACCTCTCATCTAATTGTCATGATATTACCAATGTAGCTTCTAGCATGTCTGAGGCTGGATCTGCTTCTCAATCACAGTCTTCTTTGCTTCCTGTGTCCTCGTTCTACCAGCAGAACATGTTTGAAGGAAACAGCAGCCCAGGTTTGCATCTGCAAAACAGTTTTCAGAACTTTTCGAGCCAAGAAGCCTCAAACCTTCTTAATCTGCCTCGAAGTGGCCAATTAATGGCATCAGAGGGATGGCCTTCAAAAAGGTTGGCTGTGGAACCCCTTGCTAATCTTGAAGCTCAATCTGTGCAGCACAAGCTTGAGAAAGTGAGTCACCAGAGTAATGTGTCTCACATTTCTGGCACATTGGCACCACTATCAGCAAGAGATGGTTCTAGTGCCCAGGCACTTGGTACAAATGTTCAGAGTCACCTGCTTTCTTCATCATTTGCAATCCATGATGGCATGACAACTGTCAGGAGTGGTGGTGTTGGCAGTGGAACTGATGCGATAACCATAGCTTCATTAAGATATAGTGATGTGAATTTGCTACCTGAAAACTCCTTAGCAACTTCCAGTTGTTTGGGTGAATCAGGAACCTTCAATTCTCTTGATGATGTTTGTGGCGTGAACCCATCACAAGGTGGAACCTTTGTGAAGGTTTACAAATCAGGGTCCCTCGGGAGATCGCTCGATATCACCAGATTCAGCAGCTACTACGAGTTACGTAGCGAGCTCGAGCGATTATTTGGTCTTGAAGGCCAACTGGAGGACCCTGTAAGATCAGGCTGGCAGCTTGTATTCGTCGACCGGGAAAATGATATTCTTCTCGTCGGCGACGACCCGTGGCAGGAGTTTGTGAATAGCGTGTGGTGCATAAAGATCCTCTCGCCACAAGACGTGCAGCAGATGGTCCGTGGCGGGGACGACCTTCTGTCTACACCTGGAGCAACGATGCTACAGAGCAGTGTGGCTTGCGATGACTATTCTGCAGGCCACAGCATGCAGAACCTCACCGGCAGCATTGCACCTGTGGTTCCCCTAGACTACTGA
>Seita.4G040100.1
ATGAAGGATCCCGGATCGGGCGGCGTCACGCCCAGCCCAGCAGAAGGGGACAAGAAACCCATCAACTCGGAGCTGTGGCATGCTTGTGCCGGGCCCCTGGTGTCGTTGCCGCCCGTGGGCAGCCTCGTCGTGTACTTCCCGCAGGGCCATAGCGAGCAGGTTGCTGCTTCAATGCATAAGGAGCTGGACACGATCCCCAGCTACCCGTCTCTGCCTTCTAAGTTGATCTGCAAGCTTCTAAGTCTCACCTTACATGCAGATTCTGAAACCGACGAAGTTTATGCCCAGATGACGCTTCAGCCTGTTAACAAATATGATCGAGATGCAATGCTGGCATCTGAACTGGGTCTGAAACAAAACAAGCAACCAACAGAATTCTTTTGCAAGACGTTGACAGCAAGCGACACAAGTACACACGGGGGATTCTCAGTGCCACGCCGTGCAGCTGAGAAGATATTTCCACCACTAGACTTTACGATGCAACCACCAGCGCAAGAACTCATTGCGAAGGATCTTCATGACATTTCATGGAAATTTCGACACATTTATCGAGGTCAACCAAAGAGGCATCTTTTGACAACTGGTTGGAGTGTCTTCGTCAGTACCAAAAGGCTCTTAGCTGGTGATTCAGTTCTCTTTATAAGGGATGAGAAATCTCAGCTTCTCTTAGGCATTCGGCATGCTAGCAGACCCCAACCAGCTCTGTCATCATCAGTTTTATCAAGTGACAGCATGCACATTGGAATTCTGGCAGCAGCAGCCCATGCCGCTGCAAATAGTAGCCCATTTACTATTTTCTATAATCCAAGGGCAAGCCCATCAGAATTTGTCATCCCTTTAGCAAAATACAATAAGGCTCTATATACACAAGTGTCCCTTGGAATGCGATTCAGAATGCTCTTTGAGACAGAGGATTCAGGGGTAAGAAGATATATGGGCACAATCACAGGCATTGGTGACTTGGATCCAATCCGGTGGAAGAATTCTCATTGGCGAAACCTTCAGGTTGGTTGGGATGAATCAACTGCATCTGAGAGGCGCACCCGTGTTTCCATATGGGAGATTGAGCCAGTTGCTACACCATTTTATATATGCCCACCGCCATTTTTCAGGCCAAAGCTTCCTAAGCAGCCCGGAATGCCAGATGATGAGAATGAGGTTGAGAGTGCTTTCAAAAGAGCGATGCCGTGGCTTGGTGATGACTTTGCTCTGAAAGATGTCCAAAATGCATTATTTCCAGGCCTGAGCCTAGTTCAATGGATGGCTATGCAGCAAAATCCTCAGATGCTAACAGCTGCTGCCCCTGCTGTACAGTCTCAATACTTGACCTCTAATGCACTGGGTATGCAGGATGGGATTGGCGGTGTCAATGAAGATCCAGCAAAAAGATTGAGTATGCAGGCCCAAAATATTGGCTTACCTAACTTACAGGCTGGTTCAAAAGTGGACCACCCTGCAATTACCTCATTAGCTCAACAACAGCAGCAGCAGCACCCTATATTGCAACAGCAGCAGGTCCAACCACTGCAGCAAAACTCTGCAATTCTACAGCAACAGCAAGCCCAGCTGTTGCAGCAGAATGCCATTCACTTGCAACAGCAGCAAGAACAACTCCAACGGCAACATTCACAGCCACCACAGCAGTTGAAGGCCACTGCATCTCTTCAGCCAATGGACCAGCACAAGCTGAAAGAGCAACAGCCTTCAGGCGGACAAGCAGTCTCACAAGCACAATTGTTAAACCAGATTTTGCAACCATCGTCCTCTCAGATACAACAGTTGGGTTTACCCAAGTCACCTACCCAACGGCCAGGGTTACCAGGTTTAACGACCATGGGTTCTTTGCCACAACCACAATTAACTCAGACTCCACAGCTGCAACAAACAGCAGAATACCAGCAGGCACTCCTACAAAGTCAACAACCCCAACTACAACAACTATCACAATCAGAACTGCAGCTGCAGCTGCTTCAAAAGATTCAACAACAAAATTTGCTATCTCAGCTGAACCCACAGCATCAGTCGCAGCTGATCCAACAACTATCTCAGAAAAGCCAGGAAATTCTCCAACAACAAGTTCTTCAGCATCAGTTAGGCGGTGCTGATACTATGGGCCAGCTCAAGCATTTGCAGCAAACACCTTTGAACCACATGACAGGATCCATGACACCCCAGCAACTTGTAAGATCACACTCAGCACTTGCTGAGAGCGAAGAACCATCCAGCTCAACAGCTCCATCTGGCAGCCGTGTCTCTCCAATAAATTCATTGAGTAGAGCACAACAAGGAAGCAGAAATTTGCCTGAGATACCATCAACACCACACATTGAGCACTTACTTCAGGAAATTCAAAGTAAGTCAGATAATCGAATTAAGAATGACATACAAGGCAGTAAAGAAACGGTCCATGCACCTAATCGGCATCCGGCTTCAGATCAACTTGACGCATCATCTGCGACCTCCTTTTGTTTAGATGAGAGCCCACGAGAAGGCTTTTCCTTTCCTCCAGTTTGTTTAGATAGCACTGCTCAAGTTGATCCAAGAGATAACTTTCTTATCGCGGAAAATGTAGATACATTAATGCCCGATGCCCTGTTGTCAAGAGGGATGTCTTCAGGAAAGGGTATATGCAATCTACCTACTGGACAAAGGGATCATAGGGATGTGGAGAACGAGCTATCCTCTGCTGCATTCAGCTCCCAGTCATTTGGTGTGCCTGACATGTCTTTTAAGCCTGGATGTTCAAGTGATGTTGCTGTTGCTGATGGTGGAATGGCAAGCCAAGGTTTGTGGAATAGTCAAACACAACGGATGAGAACTTTCACTAAGGTTCAAAAGCGTGGATCTGTGGGGAGATCAATCGATATAACACGATACCGAGGTTATGAGGATCTTCGGCATGATCTCGCATGCATGTTTGGTATTCAGGGGCAGCTTGAAGATCCCTACAGAACAGATTGGAAGCTGGTGTATGTTGATCATGAAAATGACATCCTCCTCGTTGGGGATGACCCCTGGGAGGAGTTTGTAAGCTGTGTGAAGAGTATCAAAATATTATCATCTGCTGAAGTACAGCAAATGAGCTTGGATGGCGACCTTGGTTGCATCCCTCCACAAGGGCAAGCCTGTAGCGCTTCCGATGACGCAAATGCGTGGAGGGGCTGA
>Seita.4G240600.1
ATGATCAAGCAGCAGCAACAGCCGGCGAGCTCCGTCGGGCCACAGGCCGCCGCCGTGGCGGCAGCGGCGGCGAGCGGATGCGAAGGGGAGAAGAAGCCGCCGGCGATCAACTCGGAGCTGTGGCACGCCTGCGCGGGGCCGCTGGTGTCGCTGCCGCCGGCGGGCAGCCTCGTCGTCTACTTCCCCCAAGGCCACAGCGAGCAGGTTGCTGCTTCTATGCAAAAGGATGTTGATGGACATGTTCCAAGCTACCCAAACCTTCCATCAAAGTTGATTTGCCTTCTGCATAACGTCACTTTACATGCGGATCCAGAAACAGATGAAGTGTATGCGCAAATGACTCTCCAGCCAGTTACTTCATATGGAAAGGAGGCATTGCAACTATCAGAATTAGCTCTGAAACAACCAAGGCCTCAAACAGAGTTCTTCTGTAAGACCCTGACTGCAAGTGACACAAGCACTCATGGAGGCTTCTCCGTGCCTCGTCGAGCAGCTGAGAAGATATTTCCACCCCTTGATTTCTCCATGCAACCACCTGCCCAAGAGATACAAGCCAGGGATCTACACGATGCCACATGGACATTCCGTCACATATACCGAGGTCAGCCAAAAAGACATCTGCTTACCACTGGATGGAGTCTTTTTGTTAGTGGGAAGAGATTATTTGCTGGTGATTCTGTCATTTTTGTTAGGGATGAAAAACAGCAACTGCTACTAGGAATCAGGCGTGCTAACAGACAGCCAACTAACATATCATCATCTGTCCTTTCAAGTGACAGCATGCATATAGGAATTCTGGCTGCAGCAGCCCATGCTGCAGCGAACAATAGCCCATTTACCATATTTTATAATCCTAGGGCTAGTCCTACAGAGTTTGTTGTACCGTTTGCTAAGTATCAGAAGGCACTCTATGGTAACCAAATATCTTTAGGAATGCGCTTTCGCATGATGTTTGAAACTGAGGAATTAGGCACAAGAAGGTACATGGGTACAATAACTGGCATTAGTGATCTAGATCCAGTAAGATGGAAAAACTCACAATGGCGCAACTTACAGGTTGGCTGGGATGAATCTGCAGCAGGCGAAAGGCGGAACAGGGTTTCAATCTGGGAAATTGAACCGGTAGCTGCTCCATTTTTCATATGCCCTCCACCATTTTTTGGTTCAAAACGTCCCAGACAACTAGATGATGAGTCCTCAGAAATGGAGAATCTCTTAAAGAGGGCGATGCCATGGCTCGGTGAGGAGATATGCATAAAGGATCCGCAGACACAGAACACCATAATGCCTGGTCTGAGCTTGGTTCAGTGGATGAACATGAACATGCAGCAGAACTCCTCGTTTGCAAACACGGCAATGCAGTCTGAGTACCTACGATCACTAAGCAACCCCAACATGCAAAATCTTGGTGCAGCTGATCTCTCAAGGCAGTTATGCCTGCAGAACCAGATTCTGCAACAGAACAGTATTCAGTTTAGTTCTTCCAAACTTCCTCAGCAAATGCAGCCGGTCAATGAGTTGTCCAAGGCAACACTCCCACTGAATCAGCTTGGCATGGGCACCAAACTGCAAGAACAGATTCACGATCCCAGCAATCTGCAGAGGCAACAACAGTCCATGAACCAACTTCTTCCATTGAGTCAATCTCAAACCAATCTTGTCCAGGCTCAGGTCCTTGTCCAGAATCAAATGCAGCAGCAGCAGCAACCACCATCCATGACTCAAAATCAGCAGCCAGCTGCCAGCCAGCCGCAACTCCTGCCCCATCCGCAGCAGCAGCAGCAGCAGCAGCAGCAGCAACAGCAACAACAACAACAAAAGTTACTACATCAGCAGCAGCAGCTTTTGCTTCAGCAACAGCAATTGCAGCAGCAGCAGCAAAATCAGCAACAGCTAAATAAGATGGCTGCGCAAGTGCCAAATCTGGCAGCTCAGCAGCTGCAATTGTCTGATCAGCAGCTTCAACTGCAACTGTTACAGAAATTGCAACAGCAGCAGCAGTCTTTGCTATCACAACCAGCTGTTACTCTTGCACAGTTACCGCTAATCCAAGAGCAGCAAAAGTTGATTCTTGATATGCAGCAGCAGCTGTCAAACTCTCAATCGCTTTCCCAGCAACAAACGATGCCCCAACAAAGTACCAAAGTTCCATCACAGGCAACACCACCACCACCGCCATCCATGCAACAAGAGCCACAGCAGAAGGTTCCACAGAAGCATGTTGGGTTCACTGACACATCACATGCTGCAATTCCTCCAACTACATCAGTCAATGCCATTTCAGCAGCTGGAAGTTCTATGATGGCAAATGGTGCAGCACATTCTGTACTTACCGAGGAAATCCCTTCTTGCTCAACATCACCATCAACAGCTAATGGTAACCATCTTGCGCAACCAATTCTTGGAAGGAACCAACAATGCGGCATGATCAACAATGAGAAGTTGCCTCAGTCTACTGCTCCTATGTCAATACCAAGCTCCCTTGAAGCTGTCACAGGGATACCGAGATCGACTAAGGAACTGCCGAAGTTGAATTCTAATGTCAAGCAAAGTGTGATGGCTTCAAAGTTACCAAATACAGGGCCTATACCACAGAATTTGGTGAACAGTGCACCCCCAACGGACTATCTGGAAACAGCTTCATCAGCAACTTCAGTGTGGCTTTCCCAAGCGGATGGACTTTTACATCAAGGTTTCCCCATGTCTAACTTCAACCAGCAGCAGATATTCAAAGATGCGCCTCCTGAGACTGATATTCAGGGTACTGATCCAAGTAATAATGCACTTTTTGGAATAAACAATGATGGTCAGCTGGGTTTTCCCATGGGAGCAGATGCCTTCTTGTCAAATGGAATTGATGCTTCCAAGTATCAGAATCATATTTCAACAGACATTGATGGTAACTACAGGATTCCAAAGGATGGTCAACAAGAAATATCGTCATCCATGGTTTCACAGTCGTTTGGTGCATCGGATATGGCATTCAATTCAATTGACTCTGGTATGAATGACGGTGGTTTCTTGAACAGAACTTCTTGGCCGCCTGCTGCTCCTCTGAAGAGGATGAGAACATTTACCAAGGTGTATAAACGTGGAGCTGTAGGCCGGTCCATTGACATTAGTCATTATTCTGGATACGATGAGTTGAAGCATGCTCTGGCTCGCATGTTCAGTATTGAGGGGCAACTTGAGGAACAGCAGAGAATTGGCTGGAAACTTGTTTACAAGGACCATGAGGATGACATCCTACTTCTTGGTGATGACCCATGGGAGGAATTTGTCAACTGTGTGAGGTGCATTAGGATCCTGTCGCCTCAGGAAGTGCAGCAGATGAGCTTGGATGGTGATCTTGGGAACAACATTCTCCCTAACCAGGCCTGCAGCAGCTCAGATGGTGGGAATGCCTGGAGAGCTCGCTGCGATCAGAACTCTGGTAACCCTTCTACTGGTTCATATGACCAGTTTGAATGA
>Seita.4G257800.1
ATGATTACTTTCGTGGACTCGGCGGCCATGGAGCGGGAGCGGGAGAGCGACAAGTGCATGGACCCGCAGCTGTGGCACGCCTGCGCCGGCGGCATGGTCCAGATGCCGGCGGTGCACTCCAAGGTGTACTACTTCCCGCAGGGCCACGCGGAGCACGCGCAGGGCCCCGTCGAGCTCCCCGCCGGCCAGGTCCCGGCCCTCGTCCTCTGCCGCGTCGCTGCCGTCCGCTTCATGGCCGATCCGGACACCGACGAGGTCTTCGCCAAGATCCGCCTCGCCCCCGTCCGGCCCAACGAGTCCGGATACGCTGCCGACGCCGAAGACGCCATTGGCGCCGCCGCGGGCGGGCAGGAGGACAAGCCCGCGTCCTTCGCCAAGACGCTCACGCAGTCCGACGCCAACAACGGCGGGGGTTTCTCCGTGCCGCGCTACTGCGCCGAGACCATCTTCCCGCGGCTGGACTACTCGGCCGATCCCCCCGTCCAGACCGTGCTCGCCAAGGACGTGCACGGCGTGGTCTGGAAGTTCCGGCACATCTACCGCGGCACGCCTCGCCGCCACCTCCTCACCACCGGGTGGAGCACCTTCGTGAACCAGAAGAAGCTCGTCGCCGGGGACTCGATCGTGTTCATGAGGACGGAGAACGGGGACCTCTGCGTCGGCATCCGGCGCGCCAAGAAAGGCGGCATCGGAGGGCCGGAGTTCTTGCATCAGCCGCCTCCGCCGGGCGGCAATTACGGGGGATTCTCCATGTTCTTGAGAGGAGACGAGGACGGCAACAAGATGATGGCCACGAGGGGAAAGGTCAGAGTGCGGGTGCGGCCGGAGGAGGTCGTCGAGGCATCTAAACTCGCCGTGAGTGGCCAACCCTTTGAGGTGGTTTACTACCCGAGGGCGAGCACGCCGGAGTTCTGCGTGAAGGCGGGGGCTGTCCGAGCGGCGATGCGCACCCAGTGGTGCGCCGGCATGAGGTTCAAGATGGCCTTTGAGACGGAGGACTCGTCCAGGATCAGCTGGTTCATGGGCACGGTCTCGGCCGTGCAGGTGGCTGACCCCATCAGATGGCCCAACTCACCTTGGAGGCTTCTTCAGGTCGCTTGGGATGAACCGGACTTGTTACAGAACGTGAAGAGGGTGAGCCCATGGCTGGTTGAGCTTGTCTCGAACATGCCAGCCATTCATCTTTCTCCTTTCTCGCCACCTCGGAAGAAGCTGTGCGTTCCATTGTACCCAGAGCTTCCGCTTGAGGGCCAGTTTCCGACACCGATGTTCCATGGGAGCCCTCTTGGCCGTGGGGTTGGTCCTATGTGCTATTTCCCGGATGGCACTCCTGCAGGCATACAGGGAGCCAGGCATGCTCAATTTGGTATATCTTTATCAGATCTCCACCTTAACAAACTGCAGTCGAGTCTGTCACCTCACGGGCTTCACCATCTCGATCACGGCATGCAGCCGAGGATCGCAGCTGGGCTTATCATCGGCCATCCGGCAGCTCGAGATGATATCTCGTGCTTGCTGACCATTGGCACCCCACAGAACAAGAAATCAGATGTCAAGAAGGCGCCGCCGCAATTGATGCTATTCGGGAAGCCAATACTCACTGAGCAGCAGATATCATTAGGTACTGGTGGGGGCTTCCCGCTGTCAACTCCTAAAAGGAGCCCTTCTGATGACAATGCCGAAAAGACAGTGAGCAACTCCGATATTTCAAGCCCCGGAAGCAATCAAGATGGCACGTCCAGTGGAGGAGCCCCATCGTGCCAAGATAACAAGGTACTTGATCTCGGGTTGGAAACCGGGCACTGCAAGGTATTCATGCAGTCAGAGGATGTTGGGCGCACACTTGACCTCTCTGATGTTGGGTCATATGAGGAGCTATATCAGAGGCTTGCTGACATGTTTGGTATTGAGAAAGCTGAGTTGATGAGTCATGTTTTCTACCGTGATGCATCTGGGGCACTGAAACACACTGGAGATAAGCCTTTCAGTGAGTTCACGAAAACCACTCGGAGGCTGACCATACTAACGGACACGGCAAGCAGCGATAGCTTAGCGAGGTAG
>Seita.4G262300.1
ATGAGGCTCTCGTCGTCGTCCGGCAGCGTCCTCCCGGCTCAGGCGGGCTCGCCGGAAGCTGTTGAGGAGCACAAGTGTCTGAACTCGGAGTTGTGGCATGCCTGTGCCGGACCGCTTGTTTCCTTGCCGGCGGTGGGTAGCCGGGTGGTGTACTTCCCTCAGGGTCACAGCGAGCAGGTAGCAGCATCGACAAACAAGGAAATGGAGTCTCAGATCCCTAATTATCCTAATCTGCCTCCACAGCTTATTTGCCAACTGCATAATGTGACGATGCATGCTGATGCAGAGACAGATGAGGTCTATGCGCAGATGACACTACAGCCACTCAACCCGCAAGAGCTGAAGGACCCGTATTTACCTGCTGAATTAGGTTCTGCAAATAAACAGCCAACAAACTATTTTTGCAAAACATTGACAGCAAGCGACACAAGTACGCATGGTGGATTCTCTGTTCCCCGTCGAGCAGCTGAGAAAGTGTTTCCTCCACTGGATTTCACTCAGCAACCTCCCTGCCAGGAGTTGATTGCAAAAGATCTTCATGGCAATGAGTGGAAATTTCGTCACATATTTCGCGGTCAGCCAAAGCGGCATCTTCTAACCACTGGCTGGAGTGTCTTTGTTAGTGCAAAGAGACTTGTCGCTGGAGACTCTGTCCTTTTTATCTGGAATGACAATAACCAGCTTCTTCTGGGAATTCGCCGGGCAAGTCGACCACAGACTGTCATGCCATCTTCAGTCTTATCTAGTGATAGTATGCATATTGGTCTTCTTGCTGCAGCTGCTCATGCTGCTTCAACAAATAGCCGCTTTACAATTTTCTATAACCCAAGGGCAAGCCCTTCGGAGTTTGTCATACCACTTGCAAAATATGTGAAGGCTGTGTATCATACCCGTATATCTGTGGGCATGCGTTTTAGGATGCTGTTTGAAACAGAAGAATCTAGCGTTAGGAGATACATGGGGACGATTACCGGAATTAGTGATCTTGATTCTGTTCGGTGGCCAAATTCACATTGGCGTTCTGTTAAGGTTGGCTGGGATGAATCAACTGCTGGAGAGAGGCAGCCAAGGGTGTCACTATGGGAAATTGAGCCCCTGACTACTTTCCCAATGTATCCATCTCCTTTTCCACTCAGGCTTAAGCGTCCATGGCCAACAGGCTTGCCTTCTCTGCATGGTGGTAAGGATGATGACCTGACTAACTCTCTCATGTGGCTTCGAGATACTGCGAACCCTGGTTTCCAGTCATTAAATTTCGGCGGACTTGGTGTGAATCCTTGGATGCAGCCAAGGCTGGATGCTTCCTTACTTGGTCTGCAACCTGACATGTACCAGGCGATGGCCACAGCTGCTTTCCAGGATCCAACGAAGCAAGTGTCACCCACGATACTGCAGTTCCAGCAGCCGCAGAACATAGCTGGTCGAGCTGCGCCGCTTCTGTCGAGCCAGATTTTGCAGCAAGTGCAGCCTCAGTTTCAGCAGCAGCCATACCTTCAAAACATCTCTGAGAGCACAATCCATGGCCAGGGTCAGGCTGAGCTCCTCAAGCAGCAGATTCAACGAAGCCATTCATTTAATGAGCAGAAGCCCCAGCTGCAACCCCAGCAACAGCAGCAAGAATCACAGCAGCAATCACAGTGCCTGCAAGTCCCTCAACATCAGCAAATGCAACAACAGAACAACATGACCAACTACCAGTCAGTGTCTAATGCATTGTCAGCATTTTCTCAATTGTCGTCAGCCCCTCAGTCTTCACCTGTGGCGCTGCAAACAATACTACCATTTTCACAGGCGCAGAGCTTTGCAGAAACGAATATGAGCTCATTGTCTCCATCTAATGCCACTGCCATGCAAAATACGCTGAGGCCATTCTCAGCAGAAGCAGCTTCTCAACTGAGCATGCCAAGGCCTACTGCGGTACCTGTCGCTGACCCATGGTCATCGAAGCGAGTTGCAGTGGAGTCTTTGCTTCCTTCTCGGCCCCAGGTTACATCGCAGATGGAACAATTGAATTCTGCACCACCTAGCATACCTCAAAGCTCTGCATTGGCACCACTTCCTGGAAGAGGGTGCTTGGATCAAGATGTGAACTCTGATCCTCAAAACCATCTCTTGTTTGGTGTTAGTATAGACTCACAGTCACTACTAATGCAAGGTGGCATCCCAGGCCTTCAGAATGGGAATGATTCAACTGCTATACCCTATTCCACCTCCAATTTCCTGAGCCCTTCCCAGAATGATTTCTCTTTGGATCACACACTAAATTCTTCGGGCTGCTTAGATGATGCGGGGTATGTGCCATGTTCAGATAACTCTGATCAAGTGAATCGACTACCTGCTACCTTCGTGAAGGTTTACAAATCTGGAACCTACGGAAGGTCGCTTGATATCACTAGGTTTAGTAGCTATCATGAGCTTCGTAGGGAACTAGGGCGCCTATTTGGCCTTGAGGGCCAGTTGGAAGACCCTATGAGATCAGGCTGGCAGCTTGTATTCGTCGACCGAGAGGAGGACGTCCTTCTCGTTGGCGATGACCCTTGGCAGGAATTCGTGAGTACGGTATCCTGCATAAAGATACTCTCGCCGCAGGAGGTGCAGCAGATGGGCAAGCAGGGGCTTGAGCTTCTGAGCTCGGCGGCCCCTGCGAGGAGGCTCGGTAGCAGCTGCGACGACTACGTTAGCAGGCAGGAGTCAAGAAGCCTAAGCACCGGGATCGCGTCGGTCGGGTCAGTTGAGTTCTGA
>Seita.5G004300.1
ATGGCGCAAGGGCGGGAGCCGGAGCTGTTCGCGGAGCTGTGGCGCGCCTGCGCGGGGCCGCTGGTGGAGCTGCCCCAGACAGACGAGAGGGTCTTCTACTTCCTGCAGGGCCACCTGGAGCAGCTGCAGGAGCCCACCGACCCGGCGCTGCTGGCCGAGCAGATCAAGATGTTCCAGGTGCCCAACAAGATCCTCTGCAAGGTCGTCAACGTCGAGCTCAAGGCCGAGACGGAAACGGACGAGATGTTCGCCCAGATCACTCTGCAGCCCGACCCGGATCAGGTGAATCTGCCCACATTACCTGACCCTCCCCTGCCGGAGACGCCGAGGCCAGTGGTGCACTCCTTCTGCAAGATTCTCACACCATCCGACACCAGCACCCATGGCGGTTTCTCTGTTCTCCGACGCCACGCAAACGAATGCCTCCCGCCACTGGATATGTCGATGCCGACCCCGACCCAAGAACTCATCACGAAGGACCTACATGGATCTGAATGGAGGTTCAAGCACATCTACAGGGGCCAACCCCGTCGGCACCTTCTGACTACTGGATGGAGTACTTTTGTCACATCAAAGAAGCTGATTGCGGGTGATGCGTTCGTCTACCTGAGGAGTGAGACAGGACAGCAGCGCGTCGGAGTGAGACGCCTTGTGCAGAAGCAGAGCGCAATGCCAGCATCTGTTATATCGAGCCAAAGCATGCATCTTGGGGTGCTTGCAAGCGCATCACATGCTATTAAGACTAATTCCATTTTCCTAGTGTATTATAGGCCAAGGTTAAGCCAAAGCCAATACATCGTCAGTCTGAACAAGTACCTTGAAGCTAGTAAAATCGGGTTTAATGTGGGCATGAGGTTTAAGATGAGTTTTGAAGGGGAAGACGTCCCTGTGAAGAAGTTTTCTGGAACTGTAGTTGATAAAGGAGATCTTTCTCCACAATGGCAAGGTTCTGAATGGAAAACATTGAAGGTCCAATGGGATGAAGCCACAAATTTGAATGGCCCTGAGAGGGTTTCCTCATGGGAAATCGAGCCATTCGATGCCTCTACACCTACCATAAACATACCTGTGCAACAATCAACAAAAAACAAAAGGCCCAGGGAGACAGCTGAAAGCCTGGATATTCAGGCAATGGAACCTACTCAAGAATTTTGGCTCTCTGGAATGCCTGAACAGCATGAGAAGGCAGGTATTGGCTCCAGTGAACCCAATTGTATCTCTGGACATCAAGTTGTTTGGACAAGTGAACGTGCAGGATACAGTGCCATGAGTAGTTCAGTTTGTCAGAATTCTGTAGTACTAGGGAATTGGTTCAAGGACTTCAACTCCTCAAGCAAGGGGGCCTCCCCTTCCTTGTCAGAGATTTCTCAGAAGCTGTTTCAGGTTACCAGTAATGACGCGAGGGTTCCTCCTTGGCCTGGGCTTTCTGCTTATCAAGCTGAGGAACCCTCTTCCAAGTTGTCTTCCAACACTGCTCTGTGCAGCTACCAGACCGAGGAGGTTGCTCCAAATTTTTCCAATGCTGTTGAAGAAAAGAAGGAACCCGGCATGTTTCGTCTGTTTGGTGTCAATTTGATTAACCATACAAGGAACGCTGCTGCTAGTGAAAAGATGACTGTAGGAGTTAGGGAGATATCGACCCGAACTGCTGGTTCTTTGGAAGACTCTGGTCAATTATCAGCACTCTCTAAAGTCACTAAAGATCATACACAGAATGTGAACGAAAGCCCCCGAGAAATCCAAAGCCATCAGAATTGCACTGGAAGAACTCGAATTAAGGTTCAAATGCAAGGAAATGCTGTGGGAAGAGCTATAGATTTAGTGAACCTGCATGGGTATCCGCAGTTGATCAGCGAGCTTGATGAGATGTTCGAGATAAAAGATCTGAGCTCCAAAGAGAAATGGAAGGTGGCTTTCACGAATGATGAGGGTGACACGATGGAAGTCGGCGATGTTCCTTGGCTTAAGTTTTGCCAGACGGTGAGGAAGATTGTGATCCATCCCATTGAAGATGAGAGCGACATGGATCCTTTCTTGGAGCAGGATGTGAAGACCGATTTTTAG
>Seita.5G265200.1
ATGGAGCCGAGCGGCGCTGCTAGCTGCGGCCGGCCGGCCGGCGAGCGGGCGGCCATGGCGGGCATCGACCTCAACACTGTCGAGGAGGAGGACGAGGAGGCGGAGACGCCGCTGGGTTTGAGGGAGGGGGGCACGGTGTGCCTGGACCTGTGGCACGCGTGCGCGGGCCCCGTCGCGCCGCTGCCGCGGAAGGGCAGCGCCGTCGTGTACCTGCCGCAGGGCCACCTCGAGCACATCGGCGGCGACGCAGCGCCTGCTGCGGTGCCTCCCCACGTGTTCTGCCGCGTCGTCGACGTCAACCTCCACGCGGACGACGCGACGGACGAGGTGTGCGCGCGGGTGTCGCTGCTGCCCGAGGACGAGGAGGCGGAGAGGCGTGCGCGTGCGCGGGCGCGGGAGGACGAGGACGCGGCTCGCTACGGCGAGGGCGGGGGCGCCATGAGGCCGCTCGCGCGGACGCCGCACATGTTCTGCAAGACGCTCACTGCATCCGACACCAGCACGCACGGCGGCTTCTCCGTGCCGCGCCGCGCCGCCGAGGACTGCTTCCCGCCGCTGGATTACAGTCTGCAGAGGCCATCTCAGGAGCTCGTGGCCAAGGATCTGCACGGCACGGAGTGGAAGTTCCGTCATATCTATCGAGGCCAACCACGAAGGCATCTCTTAACCACTGGATGGAGTGCATTTGTTAATAAGAAGAAGCTGGTCTCTGGAGATGCAGTTCTGTTCCTTCGCGGTGAAGATGGAGTGCTTCGATTAGGAGTGCGTCGAGCAGCACAGCTGAAAAACGTAAATCTTATTCCTGCACCGCATAACCAGTGCTCCAATCATAGGAATCTGGGAAATGTTACAGAAGCTGTGGCCACGAGGACTGTTTTTCACATCTACTACAATCCCAGGTTAAGCCAATCTGAATTCATTATACCCTATTGGAAGTTCATGAGAAGCTTCAATCAACCATTTTCTGTTGGAATGAGATGCAGAATGAGATATGAAAGTGACGATGCTTCTGAGAGAAGGTGCACTGGGATAATAATTGGAAGCAGAGAGGCCGAACCTATGTGGCATGGTTCAAAATGGAAATCCTTGGTGGTCAGATGGGATGATGATATAGAGTGCCGTCGGTCCCAATATGGTTCTCCTTGGGACATTGAGCTTACAGGATCAGTTTCAGGATCTCAAGCTCATCTATCGTGCTTCCATGTAGGTAGTTTTACAAATGGAAGTGTTTCTTCAGATTTTGCGGGATCTGCCAGATTCCACAAGGTCTTGCAAGGTCAAGAATTTTTGGGTTTCAAAACCCATGATGTTACTGCTATTTCAGCTTCGCACGCAACTGAAGCAAGAAATTTGCAGGACAGTGATGAGCGTAGTAGCTATATCAACATGAGTAACAATATCTTCGGGGTTCCAAGATTTGGTGTTAGATCTCCAGCTGGAATTCCTAGGTTTCCCTACCATTGCTCAGGCTTTGGAGAATCACAAAGATTCCAAAAGGTCTTGCAAGGTCAAGAAGTGTTTCGTCCTTTCCGTGGAGGAGCTTTGGCTGATGTCCATATAAGGACTGTTGGCATGTATCAACCTGACGGTACCCATGCATCTAGTGCAGCTTATAAATGGCCTACACCGCAAGGGTGTGATATTCGACATCCAACCAAACCAGTTCTGTTGCAAGCATCCTCCCCATCATCTGTGCTGATGTTTCCACAAACTAGTTCTAAGATACCTCACTTGGAATATGAGTACAGCTGCCTGGATGAGGATGAGGATGGTAGACGTGATAGGGCTGTCCCTACTCAAGACATGGGAAGAAGCAACCAAGCACTATCTCTTTGGCCTCATCTTGTTTCAGGCGAAGCCATAGATGAATGTACTGTAACTGAGAAGATGCACTCCCCTGTCAGTGGTGCCGAGCACGAATCGAACAATGAGAGCACTGTTGAAAATGGCTGCAAAATCTTTGGTATCTCATTGGCTGAGCAGGTTCGATCATGCGATGAAGCAGACTCTTGCAATGCAAATTGTAATTCTCGGCTCCAGCCTTCACAGTCACAAATGCAATCACTAGGCACCTGTTGGGCCACTGTAAGTGCTTCGTAA
>Seita.5G321300.1
ATGGGCATCGATCTCAACATGGTGGACGTCGGGGGCGAGGACCGGCGCCCGCCGCTGGGGGTGTGCCGGGAGCTGTGGCACGCGTGCGCGGGGCCCGTGGTCTCGCTGCCGCGGCGGGGCAGCCTGGTCGTGTACCTGCCGCAGGGCCACCTCGCCGCGGCCGGCGGCGGGGACGTCACGGCGGACCTGCCGCCGCACGTGGTGTGTCGCGTCGCGGACGTCGAGCTATGCGCGGATGCGGCGACGGACGAGGTGTACGCGCGGCTGGCGCTGGTGGCGGAAGGCGAGGCATTTGGGAGAAATGTGCGTGGTGCTGGAGTTGAAGGTGATGATGACATGGAGGATCTTGATGCTGAAAGGAAGTCCCGGATGCTGCACATGTTCTGCAAAACGCTCACAGCCTCTGACACAAGTACGCATGGAGGGTTCTCTGTTCCACGCCGAGCTGCTGAGGACTGTTTCCCCCCACTGGATTATAATCAACTCAGGCCTTCTCAAGAGCTTGTTGCCAAGGATTTGCATGGAGCCAAGTGGAAGTTTCGTCATATTTATAGGGGTCAGCCTCGTAGGCATCTCTTGACAACTGGATGGAGTTCATTTGTCCATAAAAAGAAACTGGTTTCAGGGGATGCGGTCTTATTTCTCCGAGGTGATGATGGTGAACTAAGACTGGGTGTAAGGAGAGCCATTCAGCTTAAAAATGAGGCCCTTTTTGAAGATTTCAGTAGTGACAGTGCAAAGCGGCATACATTGTCTGATGTATATGATTCCTTGGAACATAGAAGTGTCTTTCACATTTCTTACAATCCAAGAGCTACTGCTTCAGAATATATAATTCCATACCGGAAGTTCATTAAGAGCCTCAACCGTCCAGTCTGTATTGGAGCGAGGATCAACTTCCAGTGCCACAACGAAGACGTTAGTGAAAGGCGATCTGGAATGGTTGTTGGCATTAGTGAAGTTGATTCCGTGAAATGGCCTGGCTCAAAGTGGAGAAGCCTGCTGGTAAGATGGGAGGATGGTTCTGAATGCAATGGCCAAGATAGAGTATCCCCATGGGAGATCGAGATAGTTGGTGGTTCAGTCTCTGTTGCCCATTCTCTGTCTGCATCTAGTTCTAAACGAACCAAGTTGTGTCCCCAGGGAAATTTGGATGTTCCAACAATGTATGTTGCAGGGAATGGTTGTACTGACTCCGTGGAAACTGGAAAGTTACCCAGGGTCTTGCAAGGTCAAGAATTGATGGGTTTTAGGACTCATCGTGTTACGTGTGCTCCTCAAACAGCTGAGGTTGCAAAATTTCAATCTTCTGATGCTAGTAGGTTCCTTACTAATGCACGAAGCTGCATGTTGAGTGGTCCAACAAGCAGACTTGCAGTGCAGAACACCAGCTTTACCTACCAATCTGTAGGCTTCAATGAATCTATTGGATTCTCAGAGGTCTTGCAAGGTCAAGAAATTTCTCAGGCAGTTCCTATGTTCCAAGGAATGATGTCTGAGGCATGTTCAGTGAAAGGTGGATATGGGTTGCGTGGTTATATGCGTACCCCAACTACTGTTGATGGATTATCAGCCACAGCTCAAGAATGTTCTCTCACACTATCTACTCCACCAGCAGCACAAGTGCACTCCCCGCATCCCAATCACATGTTTAACCAAACTGTGGCTTCACAGCTTGGATTGGCAAGCAAGACTGCTGGCGAAGTTGGAAATAGCAGTCAGCCTCGCCCATTTGAGATGCTGTGGGAAGCTCAGACCAGGTCACAGCATGGAAGGCCTGGTCAAATTAGCTTGGATCAGTTTGAGACTAGGAGAGCTTCAGCACCAGGAGATGCTGCTAAAACTGGGTCTGGTGGGAGGGAGGTTCGCAAAACTAGCTGCAGGCTTTTTGGTTTCTCCTTGACTGAGAAGATCTTGCCAGCTGATGATGATAGCGTGAAGGAAGTGAGTTATGAGGCTGAGTGCCAGAATCCACGGATGCTGGACTTGTTTGGGTACAACCGCTCCACCCCGAATGCTGCTCTTCCGGCCCTCTGTGCCGCGCCCTTTGGAATGTGA
>Seita.5G438100.1
ATGCCGCCCGCCATCATGGCGCCGCCGCCGACGCCCCAGGCACCGTCGAACTCAGGGGATCCGCTGTACCCGGAGCTCTGGCGCGCCTGCGCCGGCCCGCTCGTCACCGTCCCGCGCCCCGGTGACCTCGTCTTCTACTTCCCGCAGGGACACATCGAGCAGGTGGAGGCGTCCATGAACCAGGTCGCCGGAAACCAGATGCGACTCTACGATCTGCCCTCCAAGCTGCTCTGCCGCGTGCTCAACGTCGAGCTCAAGGCGGAGACGGATACCGACGAGGTCTACGCACAGATCATGCTGATGCCAGAGCCCGAGCAGAACGAGGTAGCGGCTGAGAAGGCGAGTTCTGGGTCTGCCGCCACGCCGAGGCCAGCAGTCAGGTCCTTCTGCAAGACTCTCACCGCGTCCGACACCAGCACACACGGTGGCTTCTCTGTGCTGCGCCGCCACGCTGACGAGTGCCTCCCTCCCCTGGATATGACCCAGTCGCCTCCCACACAGGAGCTTGTGGCGAAGGATCTGCATGGCATGGAGTGGCGCTTCCGCCACATCTTTCGTGGGCAACCTAGGAGGCATCTCCTTCAGAGTGGCTGGAGTGTGTTTGTTAGTTCTAAAAGGCTTGTTGCTGGCGACGCCTTCATTTTCCTCAGAGGAGAAAATGGTGAACTTCGAGTTGGTGTTAGGCGGGCTATGAGGCAGCTGTCGAACATACCTTCTTCAGTCATATCTAGCCAAAGCATGCACCTCGGAGTCCTTGCAACTGCTTGGCATGCCATCAACACTAAATCCATGTTCACTGTGTACTACAAACCTCGGACGAGCCCCTCAGAGTTCATCATACCATATGATCAGTATATGGAGTCATTAAAAAACAATTATTCTATTGGGATGAGATTTAGGATGCGGTTTGAAGGTGAAGAGGCACCAGAGCAGAGGTTTACTGGTACTATAGTTGGTTGTGAAAATCTTGACCCACTATGGCCTGATTCAAGTTGGAGATACTTGAAGGTGCGTTGGGATGAGCCTTCAACTATCCCACGTCCAGAAAGGGTCTCTCCTTGGAAGATAGAGCCTGCCTCATCACCTCCTGTCAATCCCCTTCCAGTTTCTTCTAGAGTCAAGAGACCTAGACAAAATGCTCCCCAGCCTTCACCTGAATCATCTGTTCTTACAAAAGAAGGTGCATCTAAGGTTGATATTGGTTCTGCTCAAACACAACATCAAAACTCGGTCTTGCAAGGTCAAGAGCAGATGACCTTGAGAAACAACATGAATGAAAGTACCGACTCTGATGCCACTGTTCAGAAACCTATGATGTGGTCCCCATCACCCAATGGGAAAACCCACACTAGTTTTCAGCAGAGACCCTCTATGGATAATTGGATGCCATTGGGAAGGCGTGAAACTGATTTCAAGGACAACCGTTCTGCATTCAAGGATGCCCGTACATCCTCTCAATCATTTGGAGATACCCAGGGGTTCTTTATGCAAACTTTTGATGACAATCAGCACCGTCTTTCTTTCAACAATCAGTTTCAAGATCAAGGCTCAGCTCATCGCTTTGCGGACCCATACTTCTTTATGCCTCAGCAACCTTCTCTGACTGTTGAATCAAGCACAAGGACGCAAACAGCAAACAACGAGTTGCGATTCTGGAGCGATCAGAATACGGTCTATGGTAACACAACTGATCAGCAGGGTTTCAGATATGGACAGAATCCATCAAATTGGTTGAATCAGCCATTCCCCCTGGTTGAACAGCCACGAGTTGTCAGACCTCACGCATCGGTTGCTCCATTTGATTTAGAGAAGACAAGAGAAGGCAGCGGGTTTAAGATTTTTGGGTTCAAAGTTGATACCGCGAGTGCATCTCCTATTCAGTTGAGCTCTCCGATGTCTGCAATGCGGGAGCATGTGGTACAAACTCAACCATCAGCATCGGTGAATGAATTGCAACCCGTGCAAACTGAATGCTTGCCTGAGGGGTCTGTAAGCACAGCTGGAACATCAACTGAGAATGAGAAAAGCATTCAGCAAGCTACACAAAGTTCAAAAGATATTCAAAGCAAGTCCCAGGGTGCTTCAACAAGGAGTTGCACGAAGGTTCATAAGCAAGGAGTTGCACTTGGCAGATCTGTGGACCTCTCAAAGTTCAGTGACTATGATGAGCTCAAAGCAGAACTAGACAAAATGTTTGAATTTGAGGGTGAATTGGTATCTGCTAACAAGAACTGGCAGATTGTTTATACCGACAATGAGGGTGATATGATGCTTGTGGGAGATGACCCGTGGGAAGAGTTCTGCAGCATAGTGCGCAAGATCTACATTTACACGAAGGAGGAGGTCCAGAAGATGAACTCAAAATCATCTGCCCCAAGAAAGGAGGAACCTCCAGCTGCTGGTGAAGTATGTGCAGCCACAAATGAGTAG
>Seita.6G212000.1
ATGGCGGCGCCGGGGACGAGCTCCGGCGGGGCCGGGGGCGAGGGGGGCGGCGGGGGCACGAAGGTCAACCAGGAGCTGTGGTACGCGTGCGCGGGGCCGCTCGTCGCGCTGCCGCCGGCGGGGAGCCTCGTCGTCTACTTCCCCCAGGGCCACAGCGAGCAGGTAGCAGCATCTATGGGAAAGGATGCAGATGCCAAAATTCCGAGCTATCCAAATCTTCCTTCTAAGCTTATATGCATCCTCAATAGTGTTACTATGCATGCTGATACTGACACAGATGAGGTTTATGCTCGAATGACTCTCCAACCAGTTAGCAATGTGACACAGTGTGACAAGGAGACACTGCTGGCATCAGAGCTTGCACTGAAACAAACCAGACCACAGACAGAATTCTTCTGTAAAACACTGACTGCAAGTGATACAAGCACTCATGGAGGTTTCTCTGTGCCACGGCGCGCTGCCGAGCGAATTTTCCCCCATCTTGACTTCTCAATGCAGCCTCCTGCTCAGGAACTGCAGGCCAGGGATTTGCATGATTCAATTTGGACATTCCGTCATATATATAGAGGCCAGCCTAAAAGGCATTTGCTGACTACCGGCTGGAGCCTATTTGTCAGCGGAAAGAAACTTCTTGCTGGGGATTCCGTCTTATTTATTAGGGATGCAAGGCAGCAACTCCTCTTGGGGATAAGGCGAGCAAATAGGCAACCTGTTAACCTCTCATCATCTGTTTTGTCTAGTGACAGTATGCATATTGGTATTCTTGCTGCTGCAGCCCATGCAGCAGCCAATAACAGCCAATTCACGGTATTCTATAACCCAAGGGCAAGTCCTTCAGAATTTGTGATTCCTTTTGCCAAGTACCAGAAGGCTGTCTATAGCAACCAACTATCTCTTGGCATGCGGTTTCGGATGATGTTCGAAACAGAAGAATCTGGAACAAGAAGGTACATGGGAACAATAACAGGTATAAGTGATCTGGATCCTGTAAGGTGGAAAAACTCCCAGTGGCGCAATATTCAGGTTGCATGGGATGAAGCTGCACCAAGTGAGAGGCGCACCAGGGTTTCCCTCTGGGATATCGAGCCTGTCATTGCTCCATTCTTCATATATCCTTCACCATTGTTCACTGCAAAACGTCCAAGACAACCAGGGATAACAGATGATGAAACCGCTGACATGGAAAATCTTTTTAAGCGGACCATGCCGTGGTTTGGTGAGGAGATTTACAAGAAAGATCTGAATACTCAGAACAACTTAGTTCCTGGATTAAGTTTAGTTCAGTGGATGCAACAGAACCCCTCACTCACTAGCACAGTTGTGCAACCGGAATTGCTAAACTCATTAGCTGGCAAACCTGTACAAACTCTGGCTGCAGCTGATATGTCAAGGCAAATCAGCTTCCAGCCCCAGTTCCTGCAACAAAATAACATCCAGTTCAACACTTCGCTGCTACCTCCACAAAACCAGCAGACCGAACAGTTAGCAAAAGTGATAGCTACACCAAACCAATCGGGAAGTGTCATAGTATCACAGAAGGTAGTACAAGATTGCAATCCCGAACAGAAGCAGCATGCTATAACTCAACCAGTGCAAGGCAGCCAACCAATGATAAGTGCCGCACAGCCTCAATTTGTTGTCCAGAACCAACTCCAGCAACCTCAAGTCATTCTCCAGGCTCAGGCTCAGCAACCTCAAGTCATTCTCCAGGCTCAAATCCAGCAACAGCAGCCTTTGGTTCAAAACCACACAGTTCTACATGGTGATCTTCAACAAGCCCAGCTTCTACAGCAACAGGAACCACATTTACAGCAGCAGCCACAACAGGTTCAGCAATCAGTGCAGGAACAGCAGCAAATAAAGATACAACCTGTTCAGGTACTGAATGGTACAAACGTGATCACACAGCTTTCTGATCATCAAATGAAAATACAACTATTGAAGGCTCTTCAGCCTCAGCAGCCTTTGATCATGGAGCAGCAGAAAATGATCTTGGACTTGCAGCATCAAATGGTAAATTCCAATTCCCAGTCAGCTGCGCAGCAGTGTGCACAAGTAACTACCCAAGCGGGTGGTATGCATAGCAGTAACACTATTCAGTACCCGACACAGCAAAAGACTCAACCTCACCAACCAATTCAAGATTTCCCTCGGCATGCTGTGTCTGTTGCAAACCCAGAAATTGCTACCTCCATGGGTACTCGCTCTTTGCATGTCCCAGGTGGAGTGCAGTTATTGAAGACAGAAGATGTTCCCTCTTCGTCAACATCACCACCCACAAACAATAATCCTGTTCTTTTGCAATCAGTTCCATGTAGCTCCAAGAACCAAAGTATACTTACTGCAGCAAAGACACCTCAATCATCTGCTGTAGTGGGCCCTACACTTGGACAAGGCATGAAGCCTTATGAGAGTGCACAGCAGATGGTGATGATTCCCAAGGGGGCTGAACAAAAGCCAGTTACCAGGCAAGACTATGTGAATAACACTCCTCAGATGGATTATTTGGACACATCCTCTTCAGCTACTTCAGTTTGCCTTTCTCAGGCTGATGGATCATTGCATCAAAACTTTCCACCTTCGTCCTTCAATCAGCATCAGCTGTTACGAGAAACAGTTCCAGATAGCGAGTTTGAGGTTACAGATCCAGGAAATAACTTTCTATTTGGGGTAAACATTGATGGCCATTTGGATTCCCTTAATGCAGATGCTTTGCTTGCGAATAACTTTGAAACTGAGAAGTACATGGATCATATGCCAGGACATGGCATCTCTAATTACATTTCATCAAAGGATTCTCAGCAAGAGTTATCATCTTCAATGATTTCACATTCATTTGGTGTTGCTGATATTGCATTCAATTCTATAGATTCATCAATCAATGATGCCCCATTCTTAAACAGAAATTCCCGGCCTCCAGCTCCTGCGCATCAACGGATACGAACCTACACAAAGGTGCACAAGCGTGGGGCTGTTGGAAGATCTATCGACATCAATCGATATTCCGGATATGATGAACTGAAACATGATGTTGCCCGGATGTTTGGTATCGAGGGGCAACTCAGTGACCAAAATAGAGGTGGCTGGAAGCTAGTTTATGAAGATCACGAGAAGGATGTTCTATTAGTTGGCGATGACCCATGGGAGGACTTTGTGAACTGCGTACGGTGCATCAGGATTCTTTCTCCACAGGAAGAAATGCAGATGAGATTGGCTAGCGACTTTGGAGACAGCTTTCTACACAACCAAGCATGCAGCAGTTCAGATGGGGGTCACCCATGGAGGGTCACCGGTGACTAG
>Seita.7G108100.1
ATGGCCGCGGCGATGGACGTGGCGAACCCTGGAGCGGCTGCTTCCTCAGGAATGTCAAGCGATGCTCTGTACCGGGAGCTATGGCATGCGTGTGCCGGTCCGTTGGTCACAGTGCCTAGACAAGGCGAGCGCGTCTATTACTTCCCCCAGGGCCATATGGAGCAGCTCGAGGCGTCTACACATCAGCAGCTTGACCAGTACCTACCCATGTTCAACCTACCATCCAAGATCCTATGCAGTGTTGTCAATGTGGAACTACGGGCTGAAGCTGATTCAGATGAAGTTTATGCTCAAATTATGCTGCAACCAGAAGCTGATCAAAGCGAACTCACCAGCCCGGACCCTGAACTACAAGAACCTGAGAAATGCACTGCACATTCCTTCTGCAAGACACTGACAGCTTCAGATACGAGCACCCATGGCGGTTTTTCTGTTCTTAGGAGGCATGCTGAAGAATGTCTTCCTCAGCTGGACATGTCTCAGAATCCACCTTGCCAAGAACTGGTTGCCAAAGATCTTCATGGCACCGAATGGCATTTCCGGCACATTTTTCGAGGACAACCCAAGAGGCATCTCCTTACTACTGGCTGGAGTGTCTTTGTTAGCTCAAAAAGATTGGTCGCTGGTGATGCATTTATTTTCATGAGAGGTGAAAATGGTGAGCTAAGGGTTGGCGTAAGGAGGCTCATGAGACAAGTAAATAACATGCCGTCATCTGTCATATCAAGCCACAGCATGCATCTTGGAGTCTTGGCAACAGCCTCCCATGCCATCTCCACTGGAACCCTCTTTTCCGTTTTCTACAAACCAAGAACTAGCCGCTCTGATTTTATTGTGAGCGTCAACAAGTACCTTGAAGCTAAGAAGCAGAAAATATCTGTTGGAATGAGGTTTAAGATGAGATTTGAAGGTGATGAAGCTCCTGAAAGAAGGTTCAGTGGAACAATTGTTGACATCGGGAGTTTGCCGGCAATGTCAAAATCTCTGTGGGCAGATTCTGACTGGAGATCTCTAAAGGTCCAATGGGATGAGCCTTCATCTATTCTTCGTCCAGATAGAATCTCACCATGGGAAGTGGAACCACTGGATGCAGCTAATCCGCAATCCCCTCAACCTCCATTAAGGAATAAGCGTGCACGACCCCTGGCTTCACCTTCTATGGTTGCAGAACTGCCTTCAGGCTTTGGACTCTGGAAATCCCCAACGGATTCAGCTCGGACTCTCTCATTTTCGGAACCGCAACGTGCTCGGGAGCTATTTCCTTCAATTCCTCCATCAGCCTTCTCATCGTCATCAAACGTCAGTTTCAATTCAAAGAATGAGCCATCCATGCTAAGCAGTCAGTTCTACTGGTCTGCAAGGGATACAAGAGCTGACTCTTGTGCTGCTAGCACCAACACAGTCATAGTTGAAAAGAAGCAAGAACCAAGTTCTGGTGGTTGCAGATTGTTTGGAATTGATATATGCTCAGCTGAGGAAGAAGTATTACCTGTGGTTACTGCACCAGGTCTTGGTTATGACCAAACTGCTGCCTCAGTAGAGTTGAACTCGGATAAGCTCTCACAGCTATCTGATGTCAACAATTCTGATGCCCAAGCAGCTAGCAGTGAGCCATCACCTCTTGAATCCCAAAGCCGGCAAGTGAGGAGCTGTACCAAGGTAATTATGCAAGGAATGGCTGTTGGAAGGGCTGTAGACCTGACAAAGCTTAGTGGCTACAGTGATCTTTGCCATAAGTTGGAGGAGATGTTTGATATCCAGGGGGAGCTAGGTTCCACACTCAAGAAATGGCGGGTCATTTACACTGATGATGAGGATGACATGATGCTTGTGGGGGACGATCCTTGGAATGAGTTTTGCAGCATGGTGAAAAGAATTTACATTTGCACGTATGAGGAGGCAAAGAAGCTGACATCCAAGTCAAAGCTACCGGGTAACAGTGACACCAGCAAGTTGAGCGATGTAAACTCACCGTCTGAATGGGTCATCTAA
>Seita.7G169600.1
ATGTCTGCTGCAGCCTGCGCGCCGACGCGGCTAGGGATGCTCACGTTCGCGGAGCGGATGCCGCCGCCGCCGCCGCCGCCGCCGCCGCAGCCGCAGCCGGAGCAGCTGGAGGAGGAGGTGATGATCGACGGTGGCGCCGCCGCCGAGGGGGGCGTGAGCCCGCAGCTGTGGCTGGCGTCCGCGGGCTCCATGTGCACCGTGCCGCCCGTGGGCGCCGCGGTCTACTACTTCCCGCAGGGCCACGCCGAGCAGGCCAGCGCCGCCGTCGACCTGCCGGCCGCCGCCGTCCCGCCCTTCGTGCCGTGCCGCGTCGCGGCAGTCAGGTTCATGGCCGAGCCGCACACCGACGAGGTCTACGCCAGGATACGCCTCGTCCCGCTCCGCTCCGGGGAGCCGGTGGTGGACGTGGGCGACGCCGCCGCCGCGGGGGGCGACCAGCAGCCGCAGCAGCCCAACCAGGCGTCCTTCGCCAAGACGCTGACACAGTCCGACGCCAACAACGGCGGCGGCTTCTCCGTGCCGCGGTTCTGCGCCGAGACAATCTTCCCGGAGCTGGACTACCGCGCCCGGCCGCCCGTGCAGAGCGTCTACGCCAGGGACGTGCACGGCGTCGAGTGGTCGTTCCGCCACATATACCGCGGCACCCCGCGCCGCCACCTGCTCACCACGGGCTGGAGCAACTTCGTCAACAAGAAGAGGCTCCTGGCCGGCGACTCCGTCGTCTTCGTGCGCGAAGCGAACGGCAGGATCCACGTGGGCCTCCGCCGCGCCAAGCGCGGGTTCGGCGCCGGCGCCGGGGGCGACGACGGCTTCGCCGGGTGGGGGGACGCCTTCGGGGCCCTGCAGGTGCGGGGCAATGCGGGAGGCGGGGCGCGCTACCCGGGCGGCAAGGTCCCGCCGGAGGACGTGGTCGCGGCGGCGAGGCTGGCCGCCGCCGGGCAGCCGTTCGAGGTGGTTCACTACCCGCGCGCGAGCACGCCGGAGTTCTGCGTGCGCGCGGCCGCGGTCAGGGCGTCCATGCAGGTGCCGTGGTGCCCCGGCATGCGGTTCAAGATGGCGTTCGAGACCGAGGACTCGTCGCGGATCAGCTGGTTCATGGGCACCATCGCCGGCGTCAAGGCCGCCGACCCCACCCGCTGGCCACAGTCGCCCTGGCGTCTCCTCCAGGTAGGAGACATTCTTCATGAGCGAGAGATTTTCTTCTTGAACCGTTGGCAAATCGGAAATCATCGTGGCGGTTGGTTGGCTCTGCCCTTTTCGCAGGTGGCCTGGGACGAGCCGGAGCTCCTGCAGAACGTGAAGCGCGTGTGCCCGTGGCTGGTCGAGCAGGTGTCGAGCATGCCCAACCTCCACCTGCCCAGCTTCACGCCGCGCAAGAAGCCGCGCATCCCGGAGTTCCCCTTGGAGGGCCAGCCGCTCTTCGACCCGGGCTTCCCGCCCGCCGCCCACCCGCTTCCGCCGCTGGCGCCCCACCCGCGCCCACACCACGACCAAAACCCCCACCCCCACGCCCTCGTCCCCTTATTCCCCTTCCCGGACGGCAGCGCCGCTGCAGGCATACAGGGAGCCAGGCATGCGCAATTCGCTCCGTTCTTTTCGGATCTCCACGTCGGCAACCTGCAGCAAGGCCTGCTGTTCTGCGGCTTCCGCCCCGCTGATCACCACACCACCCCTCCCGCGCCAAGGATCAGCACCGACTTGGCAATCGGCATCCCGCCGCCGCCTCGCCAAGACGCGCCGCGCTCTCCACCATCAGCTGCCTCCAAGAAGGCCGACGACGACGTCAAGCCGGCGAGGATAATGCTGTTCGGACGGGCGATACTGACCGAGGAGCAGATGAATTGTAACAGCCCGACCTCGCCGGGAGCCACCGGGGAAGGGGCGCCCAAGCCCGACCGCGACGCCGAGAAAGGGCCCAACACACCTGACGGCTCCGGCTCCGGCGTCACCGAGGGCAGTCCTACAAAGAACAACCTGTGGGAGCCCGGGCAGTGCAAGGTGTTCGTCAAGTCGGACTCCGTCGGCCGGAACCTCGACCTCTCGGCGCTGGGCACGTTCGACGAGCTGTACGCCCGCCTGGCTGCCATGTTCCGCTTCGACAACGCTGACCTGAGGAGCCACGTGCTTTACCGCACCGCCACCGGCGAGGAGAAGCACGTCGGCGATGAGCCTTTCAGTGCATTTGTGAAATCGGTGCGGAGGATCACAATACGGAGTGACGCCGGCAGCGACAGCACGGGGAGCCAATGA
>Seita.8G135700.1
ATGTACACGGAGCTCTGGAACCTCTGCGCCGGCCCGCTGGTCACGGTGCCCAGTGTCGGGGACAAGGTCTACTACTTCCCGCAGGGACACATCGAGCAGGTGGAGGCATCGACCAACCAGGTGGCTGAGCAGCACATGCAACTGTACAATCTCCCATGGAAGATCCTGTGCGAGGTCATGAACGTTGAATTGAAGGCCGAACCAGACACTGATGAGGTTTATGCCCAGCTTACTCTGCTCCCTGAATCGAAGCAGCCAGATGAGAATGGCTCTAGTGAGCAAGAGATGCCTGCTGCACCCTCTGCTGCACCTGCGAGGCCACGTGTGCACTCGTTCTGCAAGACCTTGACAGCCTCGGACACCAGCACACATGGTGGCTTCTCGGTGCTGCGACGTCACGCGGACGAGTGCCTCCCGCCACTGGATATGAGCCGTCAACCTCCAACACAAGAGCTTGTGGCCAAGGATCTGCATGGTGCCGAATGGCGCTTTCGCCACATATTCAGAGGTCAGCCACGAAGGCATCTTTTGCAGAGTGGCTGGAGTGTCTTTGTTAGCGCCAAGCGACTTGTTGCTGGGGATGCCTTCATCTTTCTAAGAGGTGTGAATGGGGAGTTGCGTGTTGGAGTTAGGCGTGCAATGAGGCAGCAAGCAAATGTTCCATCTTCAGTAATATCAAGCCACAGCATGCATCTTGGAGTTCTTGCTACAGCATGGCATGCTGTTAACACTGGAACCATGTTCACTGTCTACTATAAACCTAGGACAAGTCCAGCAGAGTTTGTGGTTCCCTGTGATCGCTACATGGAATCGCTGAAACGAAATTACCCAATAGGGATGAGATTTAAAATGAGGTTTGAAGGTGAAGAGGCTCCAGAGCAAAGGTTTACTGGGACCATTGTCGGAAATGTGGATCCTGATCAAGCTGGATGGCCTGAATCTAAATGGCGTTACCTTAAGGTGAGGTGGGATGAAGCTTCCTCCATTCCACGCCCTGAAAGGGTTTCTCCCTGGCAAATAGAACCTGCTGTAAGCCCTCCCCCTATCAATCCGCTTCCGGTGCACAGACCCAAAAGGCCTCGCTCTAATGCTGTAGCATCCCTGCCTGATTCTTCAGCTCCGACAAAAGAAGCGGCTCCTAAGGTCACAGTGGAGGCTCAACAGAATGCCCTACAAAGGGTCTTGCAGACGCAGGATAATGCAACCCCAAAAAGTGCTTTTGGTGATAAAAGTGAGCTGGATGCTGCTCAGCAGTCAGTCTTGCGACCATCAGGATTTGATCGGGAGAAGAGTACCATTGGTACGCAGAGGAAGCTGGGTTCAGATAGTTGGATGCAGATGAGCAGGCCTGAGAGTTACAATGAGATGTTATCTGGATTATCTGGATATCAGCAACCTAAAGATCTACAAAATCAGCAGGGATTCTGTTCTTTACCTGATCAGATTGCTGCTGGCCGTCCTAACTTCTGGCACACTGTAAATGCTCATTATCAGGATCAGCAAGGCAATCACAATATGTTTGGTTCATGGTCCATGATGCCTTCAAGTACTGGCTTCGGGTTGAACAGACAAAACTATCCAATGATACAGGAAGTTGGTGCGATGCCTCAGAGTTCTGCAAATACCAAATTTGGGAATGGAGTTTATACTCCACTGCCTGGCCGTGGCATCGATCAATACTCAGCTGGATGGTTTGGCCATATGGTACCTGGTTCTCGCATGGATGATGCACAGCCACGCGTGATCAAGCCTCAACCTTTGGTTCTTGCTCATGGTGACGCTCAGAAAATGAAAGGCAATTCATGCAAGCTTTTTGGAATTCACCTTGACAGCCCAGCTAAATCTGAACCTTTGAAGTCTCCACCAAGTGTTGCAAATGATGGGATGCCACAAACTCCAGCAGCAGCTGAATGGCGGAGGGTAGACACAACTGAAGTAGAGAAAAGTTCTGACCCACCTAAGACGCCAAAGCAACTTGATGCTCCACAGGCAGATCCTGTCCCATGCCCACAATCTTCAAGAAGCACACAGTGTAAATCACAAGGTGGATCAACCAGAAGCTGCAAGAAGGTCCACAAGCAAGGAATCGCCCTTGGCAGGTCTGTGGATCTTACAAAGTTCAAGGGCTACACGGAATTGGTCTCTGAGCTGGATGAGATGTTTGACTTCAACGGTGAGCTGAAAGGTTCTAACAAGGAATGGATGGTTGTCTACACCGACAACGAAGGCGATATGATGCTGGTCGGCGATGATCCCTGGGACGAGTTCTGCAACATGGTCCACAAGATCTTCATCTACACAACGGAGGAGGTCCAGCGGATGAATCCAGGCACCCTGAACTCGGGGTCTGAGGACAGCCCTGCTAATTCAATGGAGAGGGGTTCTGCTGTCAGGGAGACACTGCCAGCCTCATCCCTTAACTCTGGGAACTGCTAA
>Seita.9G219800.1
ATGAAGGAGGCGGGCGACGAGAGGTGCCTTGACCCGCAGCTGTGGCACGCGTGCGCCGGCGGCATGGTGCAGATGCCCCCCGCGCGCTCCCGCGTCTACTACTTCCCGCAGGGCCACGCGGAGCACGCGCACGGCGGCGGCGCCGCGGAGCTCGCAGCCGCGGCGGGGCCGCGCGGGCTCCCGCCACTCGTGCTCTGCTGCGTCGCCGGGGTGCGCTTCCTGGCCGATCCAGAGACGGACGAGGTGTTCGCCAAGATCCGCCTCGTGCCCGTCGCGCCCTCCGGCGAGGCGGACCTCCGGGACCCCGACGAGCTCGGCGGCGACCCCGCGGACGCGCGGGAGAAGCTGTCCTCCTTCGCCAAGACGCTCACGCAGTCTGACGCCAACAACGGCGGCGGCTTCTCGGTGCCGCGATACTGCGCCGAGACCATCTTCCCCAAGCTCGACTACCGGGCCGACCCGCCGGTGCAGACGGTGCTCGCCAAGGACGTGCACGGGGAGGTCTGGAAGTTCCGACACATTTACCGGGGCACGCCGCGCCGGCATTTGCTCACCACGGGCTGGAGCACCTTCGTCAACCAGAAGAAGCTCGTCGCGGGGGACTCCATCGTCTTCCTGCGCACCGAGCACGGCGAGCTCTGCGTCGGGATACGCCGTGCCAAGCGGGTGTCCTGCGGTGGCATGGAGTGCATGTCCGGCTGGAACGCCCCCGGGTACGGGGCCTTCTCGGCGTTCTTGAAGGATGAGGAGAGTAAGATGATGAAGGGGCCTGGGGGGTACATGAGAGGCATGGGGAAGGTGAAGATCGCAGATGTCGTCGAGGCCGCAAGCCTAGCGTCGAGGGGACAACCATTTGAGGTGGTGTACTACCCGAGGGCTAGCACACCTGAGTTTGTTGTGAAGGCTGCATCGGTGCAGAACGCGATGAGGAATCATTGGTGCCCAGGGATGAGGTTCAAGATGGCATTTGAGACAGAGGATTCGTCAAGGATCAGCTGGTTTATGGGGACGATAGCTTCTGTTCAGGTTGCTGATCCAATTCGATGGTCGAATTCGCCGTGGAGGCTTCTTCAGGTGACATGGGATGAACCAGATTTGCTGCAAAATGTGAAATGTGTCAACCCATGGCTGGTGGAGCTTGTATCAAGCATTCCGCCCATTCACCTGGGACCATTTTCTCCACCTAGAAAGAAGTTGCGGATGCCCCAACATCCTGACTTTCCGTTTGACGGTCAGCTGTTGAATCCAGTTTTCCACGGCAACCCACTTGGTCCAAGCAACAGCCCCATTTGCTGTTTCCCGGACAACGCTCCTGCAGGCATACAGGGAGCCAGGCATGCTCAATTCGGTTTACCCCTAACAGACCACCAGCTTAACAAGCTGCACCTCGGTCTGTTCCAAGGCAGCGGTTTTAACCGACTTGATGCTATCACTCCGCAATCGCGCATATCCAAGGGTTTTGTGATCACCAGTGCTCCAGTCAAAGAGAGTGTCTCTTGCTTGTTGACAATTGGCACACCACAGGGCACAGAGAAATCTGATGACAGAAAGAAACCCCATATAATGCTGTTTGGAAAGCCTATCCTTACCGAGCAGCAGATGAATTCTGGTGGATCAAGGGAAACATTCTCCCCTGAGGTTACTGGAAACGGTTCATCTGATGGCAATGCACAGAAGACAGGAAATGTATCTGACGGTTCCGGTTCATCTATTTGCATTGGTTTCTCATCTCAAGGTCGTGAGGCTTCAGAGCTTGGGTTAGAAGCTGGGCATTGCAAGGTATTTATGGAATCAGAGGATGTTGGTCGGACCATAGATTTGTCTGTCTTTGGATCATATGAAGAGCTGTATGGTCAGTTAGCTGACATGTTCGGAATCGAGAAAGCAGAAATAATGAGCCACCTCCATTACCGCGACGCCGCTGGTGCTGTCAAGCATACTGGTGAAGAACCATTCAGTGACTTCATGAAAGTAGCACGGAGGCTGACCATAACAGAGCGCGGCGAGGGGAGGCTGCAGAAACCTCTCATCGAATATATGGTCGAGCGGGCTTGA
>LOC_Os01g13520.1
ATGTCGTCGCAAGGAGCAGGAGGAGGGGTAGGGGACCCGGAGCTGTTCGCGGAGCTGTGGCGGGCCTGCGCGGGGCCGCTGGTGGAGGTGCCGCAGCGGGACGAGCGGGTGTTCTACTTCCTCCAGGGCCACCTCGAGCAGCTGCAAGAGCCGACGGACCCGGCGCTGCTGGCGGAGCAAATCAAGATGTTCCAGGTGCCGTACAAGATCCTCTGCAAGGTCGTCAACGTCGAGCTCAAGGCCGAGACGGAAACCGACGAGGTGTTCGCGCAGATTACCCTGCAGCCTGACCCGGATCAAGAGAATCTGCCAACATTACCTGACCCGCCCCTGCCGGAGCAGCCGAGGCCTGTGGTGCACTCCTTCTGCAAGATCCTGACCCCATCCGACACCAGCACCCATGGCGGGTTCTCCGTGCTCCGACGGCATGCCAACGAGTGCCTCCCGCCACTGGATATGTCCATGGCGACACCAACCCAAGAGCTCATCACAAAGGACCTTCATGGATCTGAGTGGAGGTTTAAGCACATCTACAGGGGCCAACCCCGTAGGCATCTTCTGACTACTGGATGGAGCACGTTTGTGACATCGAAGAAGCTGATTTCTGGCGACGCGTTTGTCTACTTGAGGAGTGAGACAGGAGAGCAGCGTGTCGGAGTGAGGCGTCTTGTGCAGAAACAGAGCACAATGCCGGCATCTGTTATATCAAGCCAAAGCATGCATCTTGGTGTGCTTGCAAGTGCATCTCATGCTATCAAGACTAATTCAATTTTCCTAGTGTACTACAGGCCAAGGTTAAGCCAAAGCCAATATATTGTTAGTGTGAATAAGTACCTTGCGGCTAGTAAGGTTGGATTTAATGTGGGCATGAGGTTCAAGATGAGTTTTGAAGGGGAAGACGTCCCGGTTAAAAAGTTTTCTGGAACTATAGTTGGTGAAGGTGATCTTTCTCTGCAGTGGTCAGGTTCTGAATGGAAGTCCTTGAAGGTCCAATGGGATGAAGTCACAAATGTTAATGGCCCTGAGAGGGTTTCCCCTTGGGAAATTGAAACATGTGATGGCACTGCACCTGCCATCAATGTACCCCTGCAGTCAGCAACGAAAAACAAGCGGCCTAGGGAGCCAAGTGAAACTATTGACCTTCAATCACTGGAACCAGCTCAAGAGTTTTGGCTATCTGGAATGCCACAACAGCATGAGAAGACAGGTATTGGTTCCAGTGAACCTAATTGTATCTCTGGACATCAAGTTGTTTGGCCAGGCGAGCATCCAGGATATGGTGCCGTGAGTAGTTCAGTTTGTCAGAATCCGCTAGTACTTGAAAGTTGGTTGAAGGATTTCAACTCTTCAAACAAGGGTGTCTCCCCTACCTTGTCAGAGATTTCTCAGAAAATTTTTCAGGTTACCAGCAATGAAGCAAGAATTGCTACATGGCCTGCACGTTCTGCTTACCAAGCTGAGGAGCCCACTTCCAAGTTGTCTTCGAACACCGCTGCCTGTGGTTACCGAACTGAAGAAGTTGCTCCAAATGCGTCCAAGGTTGTTGAAGGAAAAAAGGAACCTGCCATGTTTCGTCTGTTTGGTGTGGATTTGATGAAATGTACCAGCATATCTACTACCACTGATGACAAGTCAAGTGTGGGAGCAGGAGAAGCTTCAGCCAAAGGTACTGGTTCTCACGAAGACTCTGGTCAGCTGTCAGCATTCTCAAAAGTGACAAAAGAGCATATTGCTGCGGATGAAAGCCCCCAAGAGATCCAAAGCCATCAGAATTACACCGCTAGAACTCGCATAAAGGTTCAAATGCATGGAAATGCTGTGGGCAGAGCTGTGGATCTAGCTAATCTAGACGGATATGAGCAACTGATGAATGAGCTGGAAGAGATGTTCAATATAAAGGACCTCAAACAAAAATGGAAGGTGGCTTTCACTGATGATGAGGGTGACACAATGGAAGTTGGAGATGATCCTTGGCTGGAATTTTGCCAGATGGTCAGAAAGATTGTGCTCTATCCCATTGAAGACGAGAAGAAGATCGAGCCTCACCCGAAGTTACTGTCTTCAGCTAATCCAGAGCAGGATCAGAAGACTGGGTTTTAG
>LOC_Os01g48060.1
ATGGTGGGCATCGACCTCAACACCGTGGAGGAGGAGGAAGACGAGGAGGAGGGCGGCGCCACCGGCACCGTCACGGCGCCTGCGGAGGCGAGGGCGGGGGGCGCGGTGTGCCTGGAGCTGTGGCACGCCTGCGCTGGCCCCGTGGCGCCGCTGCCGCGGAAGGGCAGCGCCGTCGTGTACCTGCCGCAGGGCCACCTCGAGCACCTCGGGGCCGCGCCCGGCTCCGGCCCCGGCGCCGCGGTGCCGCCGCACGTGTTCTGCCGCGTCGTCGACGTCAGCCTCCACGCGGACGCCGCGACGGACGAGGTGTACGCGCAGGTCTCGTTGGTCGCCGACAACGAGGAAGTGGAGAGGCGGATGCGGGAGGGAGAGGACGGCGCGGCCTGCGACGGCGAGGGCGAGGACGCCGTGAAGCGGCCGGCCCGGATTCCCCACATGTTCTGCAAGACGCTCACGGCCTCCGACACCAGCACGCACGGCGGCTTCTCCGTGCCTCGCCGCGCCGCCGAGGACTGCTTCCCGCCGCTGGACTACAGCCTGCAGAGGCCATTCCAGGAGCTCGTGGCAAAGGATCTGCACGGCACGGAATGGAGGTTCAGACATATCTATCGAGGCCAACCACGGAGGCACCTTTTAACCACTGGATGGAGCGGGTTTATCAACAAGAAGAAGCTAGTATCTGGGGATGCAGTGCTATTCCTCAGAGGTGAAGATGGAGAGCTTCGATTGGGAGTGCGCCGAGCTGCTCAGCTAAAAAATGCATCTCCTTTTCCTGCACTTCATAACCAGATCTCAAATACTAGTAGTCTTAGTGAAGTTGCACATGCTGTGGCCGTGAAAAGTATTTTTCACATCTACTACAATCCCAGTTGTACTCACAGGTTAAGTCAGTCTGAGTTCATTATACCATATTGGAAGTTTATGAGAAGCTTCAGTCAACCCTTTTCTGTTGGAATGCGATTCAAATTGAGATATGAGAGTGAGGATGCTTCTGAAAGAAGGCGTACTGGAATAATAATTGGAAGCAGAGAGGCAGATCCAATGTGGCATGGTTCGAAGTGGAAATGTTTAGTGGTGAAATGGGATGATGATGTGGAGTGCCGTCGGCCTAATGGGGTATCTCCTTGGGAGATTGAGCTTAGTGGATCAGTTTCAGGATCTCATCTGTCCACTCCCCATTCAAAACGGCTGAAATCATGCTTCCCCCAAGTTAATCCAGATATTGTGCTTCCAAATGGAAGTGTTTCTTCAGATTTTGCGGAGTCTGCCAGATTCCACAAGGTCTTGCAAGGTCAAGAATTGTTGGGTTTAAAAACTCGTGATGGTACTGTTAATACAGCTTCTCAGGCGACTGAGGCAAGAAATTTTCAGTACACTGATGAACGAAGTTGCTCTATCAACATGAGTAACAATATCTTAGGGGTTCCGAGACTTGGGGTGAAAACTCCAAGTGGAAACCCTGGGTTTTCCTACCATTGCTCAGGCTTTGGGGAATCTCAAAGATTCCAAGAGGTCTTGCAAGGTCAAGAAGTGTTTCGTCCTTACCGAGGAGGGACTTTGTCCGATGCCTGTATAAGAGGTTCTGGCTTCCGTCAACCTGATGGCAACCATGCACCTGGTGCAGCATTTAAATGGCTTGCACCACAAGGATGTGATCATCATGGGATAACCACATCAGTTCTGCCGCAAGCATCCTCTCCATCATCTGTCTTAATGTTTCCACAAACTAGTTCAAAGATGCCTGGCCTTGAATACATATACGGATGCCTGGATAGAAATGAGAATAGCCGACATTTTAAGATTGGACCTACACAAGATATGACAAGAACTGATCAAACATTACGACTCTGGCCTCATCTTATTTCAGGCAAAGTGCTAGATGAGTGTACGAGAAATGAGAAGCTGCACTCTCCAGTCAGTGGTGCTGAGCATGAATCAAATAACAAGTGTCTTAATACAAATGGCTGCAAAATCTTTGGTATATCATTGACTGAAAAGGCCCAAGCAGGCGATGAAGTGGATTGTGGCAATGCCAGTTATCATTCTCGGCTCCAGTCTTTAAAACCACAGATGCCAAAATCATTGGGCAGCAGTTGTGCCACGGTCCATGAACAAAGGCCTGTTGTTGGCAGGGTCGTTGATATTTCAGCAGTGAATACGATGATCTGA
>LOC_Os01g54990.1
ATGGCGTCGTCCGCATCCTCCTCCTCCTCCCCATCCTCGCGGCCGCCGCTGATGGCTCTCCCCTCTTTTTACCGGCCCCCTTGGCCGTCCGAGAGGGGCGGCGAGCAGCGAGCCACCGACTGTTGGGCCGGATCCCCAGCGGCGGGAGGCGGCCGGGCGCGTGCCACCGCCATGGGCATCGACCTCAACAACACCGCGAGCGGCGGCGAGGAGGACGCGCCGGCGCCGGGGCCGGTGTGCCGGGATCTGTGGCACGCGTGCGCTGGGCCGGTGGTGTCGCTGCCGCGGCGGGGCAGCGCGGTCGTGTACCTGCCGCAGGGGCACCTCTCCGCGGCCGGCGCCGGCGGCGGGATCCGCGGGGAGGTGGCGGTTGCCCTCCCTCCCCACGTGGCGTGCCGCGTCGTGGACGTCGAGCTATGCGCGGATGCAGCGACGGACGAGGTGTACGCGCGACTGGCGCTGCGGGCGGAGGGCGAGGTATTTGAGAGGAACTTGCATGGTGGTGGAATCGAAAGGGAGGATGACATGGAGGATGGTGATGAGGAAAGGAAGTCCAGGATGCTGCACATGTTCTGCAAAACACTAACGGCCTCTGATACAAGCACACATGGAGGGTTCTCTGTTCCTCGTCGGGCTGCTGAGGATTGCTTTCCACCTCTGGACCACAAACAGCTAAGGCCTTCTCAAGAGCTTGTTGCCAAGGATTTGCATGGAGCAAAGTGGAGGTTCCGCCATATTTATAGAGGTCAACCTCGCAGGCATCTTTTAACAACTGGATGGAGCTCCTTTGTCAATAAAAAGAAACTGGTCTCAGGGGACGCGGTGTTATTTCTCCGGGGTGATGATGGTGAGCTAAGATTGGGTGTTCGAAGAGCTACTCAGCTTAAAAATGAAGCGATTTTCAAAGCTTTTAGTAGCGAAAGTTCAAAGATGCGCACACTGTCGGCTGTGGCTGATTCCTTGAAACATGGAAGTGTTTTTCACATTTGTTACAACCCAAGGGCTACTGCTTCTGAGTACGTTGTTCCATATTGGAAGTTCGTGAAAAGCTTCAACCATCCAGTTTGTATTGGAATGAGGTTCAAGTTTCATTTTGAGAGTGAAGATGTTAATGAGAGGCGTTCTGGAATGATTGCCGGTGTTAGTGAAGTAGACCCCATCAGATGGCCTGGTTCAAAGTGGAGAAGCCTTCTGGTTCGATGGGAGGATGCTACTGACTGCAACAGCCAAAATAGAGTATCTCCATGGGAGATTGAGATAGTTGGTGGTTCAATCTCTGTTGCTCATTCTCTGTCGGCATCCAGTTCTAAAAGAACCAAATTATGCCCTCAGGGCAATTTGGACGTGCCAGCTCTGTATGGAAATGGTCGTCCAGACTCGGTGGAAACTGAAAAGTTCCCCAGGGTCTTGCAAGGTCAAGAATTGATGGGTTCTAGGACCCATCGTGCTACTTGTTCTCCTCAGTCAATCGACATTACAAAAAGTAAGTCTTTTGATGCTTGGAGATTCCTTACTGATACACGAAGCTGCATGTTGGGCAGTTCAACAAGCAGACTTCCAGTGCAGTACTCTGGCTATACCCACCAATCTGTAAGCTTCGGTGAATCTATTGGATTCCCAGAGGTCTTGCAAGGTCAAGAAATTTCTCAGACAGTTCCTCCGTTTCAAGGAATGTTGCCTGATGCATGTTCAGCGAAAAGCAGATATGAATTAAAGAATTATGTGTGCACCCCAGCTACCATGAATGGACTATCATCTGCAAATGAAGGATATTGTCTCTCCCTGTCAACTGTGCCACCTTCTCCACCTTCCAGTCTTATGTTATACCAAACAGGGGTACCACAGCTTGAATTGGCAAGCAAGAACAATGACAAAAGTGGAAATGACAGCCAACCAGCCTTGCGACAGCACAAGTTGCTCAGTGAAACTAGCTGGGACCAGTTTAAAATTGGAAAGGCTTCAACACCTGGGAATGCTACTAAGCCTGGTAATGGTGGAAGGGAGGTTGACAGAACTAGTTGCCGCCTTTTTGGTTTTTCCTTGACCGAGAAGATTATCCCAACAGACAAAGATGGTGAAAAGGAAGTGAGTTATGAAACTGATTGCCAAAATCCACGGATGCTAGACTTGTTTGGGTACAATTGCAGTACGCCTGGTGCTCTTCATGCCCTTTGTGCTGCTCCTTTGGGAATATGA
>LOC_Os01g70270.1
ATGCCGCCGGCCGCCATGGCTCCCCCTCCCCCGCCGCAGGGCTCCTCCACAGGGGATCCGCTCTACGACGAGCTGTGGCACGCCTGCGCGGGGCCGCTCGTCACCGTGCCGCGGGTGGGCGACCTCGTCTTCTACTTCCCGCAGGGGCACATCGAGCAGGTGGAGGCGTCCATGAACCAGGTTGCCGACAGCCAGATGCGCCTCTACGATCTGCCCTCCAAGCTGCTTTGCCGTGTCCTCAACGTCGAGCTCAAGGCGGAGCAAGACACCGACGAGGTCTACGCGCAGGTCATGCTCATGCCGGAGCCCGAGCAAAATGAGATGGCGGTGGAGAAGACGACTCCTACGTCCGGCCCTGTGCAGGCAAGGCCGCCGGTGAGGTCCTTCTGCAAGACGCTCACCGCGTCTGACACCAGCACGCACGGCGGCTTCTCTGTACTCCGCCGCCACGCTGATGAGTGCCTCCCTCCCCTGGATATGACCCAGTCGCCACCCACACAGGAGCTCGTGGCCAAGGATCTGCACAGCATGGACTGGCGCTTCCGTCACATCTTTCGCGGGCAACCGAGGAGGCATCTCCTTCAGAGTGGTTGGAGTGTGTTTGTCAGTTCCAAAAGGCTTGTTGCTGGGGATGCTTTCATTTTCCTCAGAGGAGAGAATGGTGAACTCCGTGTTGGTGTTAGACGAGCTATGAGGCAGCTGTCCAATGTGCCTTCTTCAGTCATATCTAGCCAAAGCATGCACCTGGGAGTCCTTGCTACTGCATGGCATGCTATCAACACGAAGAGTATGTTCACCGTCTACTACAAACCTAGGACGAGCCCTTCAGAGTTCATTATACCATATGATCAGTATATGGAGTCCGTCAAAAACAATTACTCTGTTGGGATGAGGTTCAGGATGAGGTTTGAAGGAGAAGAGGCACCAGAGCAGAGGTTTACTGGTACTATAATTGGCAGTGAGAATCTCGACCCAGTGTGGCCTGAATCAAGTTGGAGATCCCTGAAGGTGCGGTGGGATGAACCATCAACTATTCCGCGGCCAGATAGAGTCTCTCCTTGGAAAATAGAGCCTGCTTCATCACCTCCTGTTAACCCCCTTCCTCTTTCTAGGGTTAAAAGACCTAGGCCAAATGCTCCTCCAGCATCTCCTGAATCTCCTATTCTTACGAAAGAAGCTGCTACTAAGGTTGACACTGATCCTGCTCAAGCACAACGAAGTCAAAACAGTACGGTCTTGCAAGGTCAAGAACAAATGACCTTGAGGAGCAACCTTACTGAGAGTAATGACTCTGATGTCACTGCTCATAAGCCAATGATGTGGTCTCCATCCCCAAATGCTGCAAAAGCCCACCCCTTGACATTTCAGCAGAGACCCCCTATGGATAATTGGATGCAGTTGGGAAGGCGTGAAACTGACTTTAAGGATGTCCGTTCTGGCTCTCAATCTTTTGGTGATTCCCCAGGCTTCTTTATGCAGAATTTTGATGAGGCTCCTAACCGTCTTACTTCTTTCAAGAACCAGTTTCAGGATCAAGGTTCTGCTCGGCACTTCTCTGACCCATACTACTATGTATCTCCACAGCCTTCCCTAACTGTTGAATCAAGCACACAGATGCACACAGACAGTAAGGAGTTACATTTCTGGAATGGCCAGAGTACTGTGTATGGTAATTCGAGAGACCGACCACAGAATTTCAGATTCGAACAGAACTCATCAAGTTGGTTAAATCAGTCATTTGCCCGACCTGAACAGCCAAGAGTGATTAGACCGCATGCATCAATAGCTCCAGTTGAGTTGGAAAAAACAGAAGGCAGTGGGTTTAAGATTTTTGGGTTTAAAGTTGATACAACCAATGCTCCTAACAATCACTTGAGCTCCCCGATGGCTGCAACACATGAGCCTATGCTTCAAACTCCATCATCATTGAATCAGTTGCAACCTGTACAAACTGATTGCATTCCTGAGGTATCAGTAAGCACAGCTGGAACGGCGACTGAGAATGAGAAAAGCGGTCAGCAAGCTCAACAGAGTTCAAAAGATGTTCAAAGCAAGACTCAGGTTGCTTCGACGAGGAGTTGTACAAAGGTCCATAAGCAAGGCGTTGCACTTGGCAGATCTGTGGATCTTTCAAAGTTCAGTAACTATGATGAACTCAAAGCTGAGCTAGACAAGATGTTTGAATTCGATGGTGAATTGGTGTCTTCAAACAAAAACTGGCAAATTGTTTATACTGATAATGAGGGTGATATGATGCTTGTTGGAGACGACCCATGGGAAGAATTCTGCAGCATTGTGCGGAAGATTTATATTTACACCAAGGAGGAGGTCCAGAAGATGAATTCGAAATCAAATGCCCCAAGGAAAGATGACTCTTCAGAAAATGAGAAAGGTCATCTGCCGATGCCCAACAAATCAGATAACTAG
>LOC_Os02g04810.1
ATGAAGCAGCAGCAGACGCCGGCGAGCTCCGCGGTGACCGCGGCGGCGGCGGCCTCCTCCTCCGCCACCGCCGCCGTGGCCGCATGCGAAGGGGAGCGGAAGGCGGCGGCGATCAACTCGGAGCTGTGGCACGCGTGCGCCGGCCCGCTCGTGTCGCTGCCGCCGGTGGGCAGCCTCGTCGTCTACTTCCCGCAAGGCCACAGCGAGCAGGTTGCAGCTTCTATGCAAAAGGATGTGGATGCACATGTTCCAAGCTACCCAAATCTTCCCTCCAAGTTGATATGTCTTCTTCACGGTGTCAATTTGCATGCAGACCCAGATACTGATGAAGTTTATGCACAGATGACTCTTCAACCAGTGAATACATATGGAAAAGAGGCGTTGCAAATATCAGAGCTTGCACTAAAACAAGCAAGGCCACAAATGGAATTCTTCTGTAAGACACTCACCGCAAGTGATACAAGTACACATGGAGGATTCTCTGTGCCTCGCCGTGCCGCAGAGAAGATATTCCCTCCCCTGGACTTCTCTATGCAACCTCCAGCTCAAGAACTGCAAGCTAGAGATATACATGACAATGTGTGGACATTTCGTCATATATATCGAGGTCAACCAAAAAGACATTTACTTACTACTGGTTGGAGCCTTTTCGTGAGTGGCAAGAGGTTATTTGCTGGTGATTCTGTTATTGTTGTGAGGGATGAAAAGCATCAACTTCTACTAGGAATCAGGCGTGCTAACAGACAACCGACTAATATATCATCTTCAGTACTTTCAAGCGACAGTATGCACATAGGAGTCCTTGCTGCGGCTGCCCATGCTGCTGCCAACAGTAGCCCTTTTACCATATTTTATAACCCTAGGGCCAGTCCTACTGAATTTGTTATCCCATTTGCAAAATACCAGAAGGCACTGTATAGTAATCAGATATCTTTAGGAATGCGGTTTCGCATGATGTTTGAAACCGAGGAATTAGGAACAAGAAGGTACATGGGTACAATAACTGGAATAAGTGACCTAGATCCTGTGAGATGGAAAAACTCCCAATGGCGCAATTTACAGGTTGGCTGGGATGAGTCTGCAGCTGGTGAAAGGAGGAACAGAGTTTCAATCTGGGAGATTGAACCGGTTGCAGCTCCCTTTTTTCTATGTCCCCAACCTTTTTTTGGTGTGAAGCGCCCCAGGCAATTAGATGACGAGTCAGAGATGGAAAACCTTTTCAAGAGGGCAATGCCTTGGCTTGGTGAGGAGGTATGCATAAAGGATACTCAAAACCAGAACAGTACAGCACCTGGTCTAAGTTTGGTTCAGTGGATGAACATGAACAGGCAGCAGAGCTCATCATTGGCTAACACCGCTGCGCAGTCTGAGTACCTGCAAGCTCTAGGTAACCCTGCCATGCAAAACCTTGCTGCTGATGAACTTGCAAGGCAACTATATGTCCAGAACAATCTCCTTCAACAGAACTGCATACAGTTTAATTCTCCCAAGCTCCCTCAGCAAATGCAAACCATGAACGATCTGTCCAAGGCGGCAATTCCGTTGAATCAGCTTGGTGCTATCATCAATCCTCAAGATCAGAAACAAGATGCTGTCAACCATCAGAGACAGCAGAACTCCATACAAGTGATTCCCCTGAGCCAAGCTCAATCTAATCTCGTCCAGGCTCAGGTGATTGTTCAGAATCAGATGCAACAGCAGAAGCCATCTCCAACTCAAAACCCGCAAAGGATTAATGGCCAGCGGCTGCTTTTGTCTCATCAACAGAAGGATCAAAATTTACAGCTGCAACAGCAGCTTTTACTTCAGCAAAAACAACAGTTACAGCAGCAGCAGCAGCAGCAACAACAGAATCAGCAGCAGCTAAATAAGTCCCTTGGACAGTTGGTAAATCTGGCAAGTCAGCAGTCTAAGTTGTTTGATGAGGAGCTTCAGTTGCAGATATTACAGAAACTGCAGCAGCAATCACTGATGTCACAATCCACATCAACACTCTCACAGCCACCTCTGATCCAAGAACAGCAAAAGTTAATCACGGACATGCAAAAGCAGTTGTCAAATTCACATTCACTTGCTCAGCAACAAATGATGCCCCAACAAGAAATCAAGCCTTCATTGCAAGCAACACCATTGCTACCCACGGTCCAGCAAGAGCAACAGCAGAAGCTTTTACAGAAACAAGTCTCACTTGCAGATGTGTCAGGAGTTGCTTTTCAACCAATTTCATCAACCAATGTGATCCCCAAAACTGGAGGTGCTATGATCATTTCGGGTGCTACACAATCTGTAGTTACAGAGGAAATGCCCTCTTGTTCAACATCTCCATCCACAGCTAATGGAAACCACTTTACACAATCAACCAAAAACAGACATTGCATCAACACAGAAAGGCTGCCACCGTCCACTGCTCCAATGTTGATCCCAACCTCCATTGACGCTGTAACAGCAACTCCACTAATGACCAAGGAATTGCCAAAGCCGAATAATAATGTGAAGCAAAGTGTTGTCAACTCAAAATTACCAAATGTTGCTCCTGGCCCACAAAATTGTATAAACCATGCATTGCAAACAGACAACTTGGAAACATCTTCATCAGCAACTTCATTATGTCCTTCCCGAACAGATGGACTTGTGCATCAAGGTTTCCCCTCTTCTAACTTCAATCAACACCAGATGTTCAAAGATGCACTTCCTGATGTAGAAATGGAAGGTGTGGATCCAAGTAACAGTGGCTTGTTTGGGATCAACAATGATAACCTGTTAGGATTCCCAATAGAAACAGAGGACTTGCTGATAAATGCACTTGATTCTGTCAAGTATCAGAATCACATATCAACTGATGTTGAAAACAACTACCCGATGCAAAAGGATGCTCTGCAAGAAATATCAACCTCCATGGTTTCCCAGTCATTTGGTCAGTCGGATATGGCTTTTAATTCCATTGATTCTGCGATCAATGATGGTGCCTTCTTGAACAAAAATTCCTGGCCCGCTGCCCCTCTGCTGCAGAGAATGCGGACATTCACCAAGGTGTACAAACGAGGAGCTGTAGGCCGGTCTATTGACATCGGCAGGTACTCTGGATATGAAGAGTTGAAGCATGCTTTGGCTCGCATGTTTGGTATAGAGGGTCAACTTGAAGATCGACAGAGAATAGGCTGGAAACTGGTCTACAAGGATCACGAGGATGACATCCTGCTTCTTGGTGATGACCCATGGGAGGAGTTTGTGAACTGTGTAAGATGCATTAGGATTCTATCACCTCAAGAAGTGCAACAGATGAGCTTGGATGGTGATCTGGGGAGCAATGTCCTCCCCAACCAGGCTTGCAGCAGCTCAGATGGGGTGAATGGTTGGAGGCCTCGCTGTGACCAGAACCCCGGGAACCCTTCCATCGGCCCGTATGATCAATTCGAATGA
>LOC_Os02g06910.1
ATGAAGCTCTCGCCGTCGGCCGGCGGCGTCTCCGACCAGCCGCCGTCGCCGCCGGAAGTTGCAGAGGAGCAGAAGTGCCTAAATTCTGAGTTGTGGCATGCATGCGCCGGCCCTCTCGTTTCGCTGCCTGCGGTCGGTAGTCGGGTGGTTTATTTTCCTCAAGGCCACAGTGAGCAGGTAGCTGCATCAACAAATAAGGAAATGGAGTCTCAGATCCCCAACTATCCTAACCTGCCGCCGCAGCTTATATGCCAGCTACATAATGTGACCATGCACGCCGATGCAGAGACGGATGAAGTCTATGCGCAAATGACGCTGCAGCCACTCAGCCCGCAAGAGCTCAAGGATCCATTCCTACCCGCCGAGCTAGGCACTGCCAGCAAGCAGCCAACAAATTATTTCTGCAAAACGTTAACTGCTAGTGACACAAGTACACATGGTGGATTCTCTGTTCCCCGTCGAGCAGCAGAGAAAGTATTTCCTCCGCTGGATTTCACTCAGCAGCCTCCAGCTCAAGAGTTGATGGCGAAAGACCTCCATGGAAATGAATGGAAATTCCGTCATATCTTTCGTGGCCAACCGAAGCGGCATCTTCTGACTACGGGTTGGAGCGTCTTTGTAAGTGCAAAGAGACTGGTTGCTGGAGACTCTGTCCTTTTTATCTGGAATGACAGTAATCAGCTGCTTCTGGGAATTCGTCGGGCAAATAGGCCACAAACGGTCATGCCATCATCAGTATTGTCTAGTGACAGCATGCATATTGGTCTGCTTGCTGCAGCTGCTCACGCCGCATCAACAAATAGCCGGTTTACTATTTTCTATAATCCAAGAGCAAGCCCTTCGGAGTTTGTTATACCACTGGCTAAATATGTAAAGGCTGTCTACCATACCCGCATATCGGTGGGCATGCGTTTCCGGATGCTTTTTGAAACAGAAGAATCCAGTGTTAGGAGATACATGGGGACAATAACAGGAATAAGTGATCTTGATCCTGTTCGTTGGATGAACTCACACTGGCGCTCTGTCAAGGTTGGATGGGATGAGTCGACTGCTGGAGAGAGACAGCCAAGGGTGTCTCTTTGGGAGATCGAGCCTCTGACAACTTTCCCGATGTATCCATCTCCTTTTCCTCTCAGACTAAAGCGTCCATGGCCAACAGGCTTACCTTCTTTATATGGCGGAAAGGAGGATGACTTGGCTTCTTCTCTTATGTGGCTTCGAGATAGTCAAAACACAGGTTTCCAATCTCTGAATTTTGGAGGACTTGGTATGAGTCCGTGGATGCAGCCAAGGCTGGATAGTTCCCTACTTGGTCTGCAACCTGACATGTACCAAACGATAGCGGCGGCGGCGGCTTTACAGAACACCACTAAGCAAGTATCACCTGCCATGCTGCAGTTCCAGCAGCCGCAAAACATTGTCGGTAGATCTTCTCTTCTATCCAGTCAGATTCTGCAGCAAGCACAGCCTCAATTTCAGCAGATGTACCACCAAAACATCAATGGCAACTCAATCCAAGGCCATAGTCAGCCTGAGTACCTCCAGCAACCGCTTCAACATTGCCAATCATTTAACGAACAGAAGCCTCAGTTGCAGCCGCAGCAACAGCAGCAAGAATCACACCAGCAGCAACCTCAGCATCAACAAATGCAACAACAGAAACACTTGTCCAACTTTCAGACTGTACCAAATGCATTGTCGGTTTTTTCACAGCTTTCCTCCACCCCTCAGTCTACACCCTCCACATTGCAGACAGTTTCACCATTCTCACAGCAACATAATTTCCCTGACACAAATATCAGTTGTCTCTCTCCATCCAATGTCTCATCCATGCACGATACACTGAGATCATTCCCTTCAGAAGCTGCTTCAGACCTCCCAGGTGTGCCAAGAATCACCCCTGTACCTGTCTCTGACCCATGGTCATCTAAGCGAGTTGCAGTGGAATCTACGATCACTTCTCGCCCACATGACATTTCATCACAGATAGAGAACTTCGACTTGACACCTTCTAGTATTCCTCAAAACTCCACGTTAGCACCACTGCCTGGAAGGGAATGCCTGGTGGATCAAGATGGGAGCTCTGATCCTCAAAATCACTTCTTGTTTGGTGTAAATATAGACTCACAGTCACTTTTGATGCAAGATGGCATTCCAAGCCTTCACAATGAAAACAGTTCAAGCACAATTCCATATTCCACATCCAACTTCCTTAGCCCTTCTCAAGATGATTATCCATTGAGTCAAACACTAACTACTCCGGGCTGCTTAGATGAATCAGGATATGTTCCATGTTCAGATAATGCTGATCAAGTGAAGCGACCGCATGCAACCTTTGTGAAGGTTTACAAATCTGGAACCGTTGGAAGGTTGCTCGACATCACTAGATTTAGCAGTTATCATGAACTTCGTAGTGAGGTAGGGCGCCTTTTTGGCCTTGAGGGCCAGTTGGAAGACCCTTTGAGATCAGGCTGGCAGCTTGTATTTGTTGACCGAGAGGACGACGTTCTTCTAGTTGGCGATGATCCGTGGCAGGAATTTGTGAACAGTGTGTCTTGCATAAAGATACTTTCGCCGCAGGAGGTTCAGCAGATGGGCAAGCCGGGCATTGAACTCTTCTCGACTTCTGCAAGGAGACTTGGCAACAGCTGTGACAACTACATGAGCAGGCAGGAATCAAGAAGCCTAAGCACTGGAATCGCGTCGGTGGGCTCAGTTGAGTTCTGA
>LOC_Os02g35140.1
ATGGCTGGCTCCGTCGTTGCTGCTGCTGCCGCCGCCGGCGGTGGCACAGGGAGCTCTTGCGATGCGTTGTACAGGGAGCTATGGCATGCTTGCGCTGGGCCGTTGGTCACAGTGCCTCGCCAAGGCGAATTGGTTTACTACTTCCCCCAGGGCCATATGGAACAGCTTGAGGCATCTACAGACCAACAGCTTGACCAGCATCTGCCTTTGTTTAACCTGCCATCTAAGATCCTCTGCAAAGTGGTCAATGTAGAACTTAGGGCTGAAACCGATTCAGATGAGGTTTATGCTCAAATTATGCTGCAACCAGAAGCAGATCAAAATGAACTCACCAGCCCAAAACCTGAGCCACATGAACCTGAAAAATGCAATGTCCATTCCTTCTGCAAGACTTTGACTGCTTCAGATACAAGCACCCATGGTGGATTTTCAGTTCTTAGGAGGCATGCAGAAGAATGTCTTCCTCCCCTGGACATGACTCAGAATCCACCATGGCAAGAGCTTGTGGCTAGAGATCTCCATGGAAACGAGTGGCATTTCCGTCACATCTTTCGAGGACAACCTAGGAGGCATCTGCTTACAACTGGCTGGAGTGTTTTTGTTAGCTCAAAAAGATTAGTTGCCGGTGACGCATTCATCTTTCTGAGAGGTGAGAATGGAGAGCTACGAGTTGGTGTCAGGAGGCTCATGAGGCAACTAAATAACATGCCATCATCAGTAATATCAAGTCATAGTATGCATCTTGGAGTCCTAGCAACTGCATCACATGCTATATCCACCGGAACTCTCTTTTCTGTTTTCTACAAACCAAGAACAAGTCAGTCTGAGTTTGTTGTGAGTGCTAACAAGTACCTTGAAGCTAAAAACAGCAAGATATCTGTTGGAATGAGGTTTAAGATGAGATTCGAGGGCGATGAAGCTCCTGAAAGAAGGTTTAGTGGAACAATTATTGGTGTTGGGAGCATGTCAACGTCTCCATGGGCAAATTCTGACTGGAGATCTTTGAAGGTCCAATGGGATGAGCCTTCTGTGGTTCCTCGTCCAGATAGAGTTTCACCATGGGAACTAGAGCCACTTGCTGTGAGTAATTCACAGCCATCACCTCAGCCACCGGCAAGAAATAAGCGGGCTCGGCCTCCTGCTTCGAATTCAATTGCTCCAGAACTACCTCCGGTCTTCGGTTTGTGGAAATCTTCAGCTGAGTCCACACAAGGCTTCTCATTTTCGGGACTACAGCGAACACAGGAACTATATCCTTCAAGCCCCAATCCGATCTTCTCAACATCATTAAATGTTGGATTCAGTACAAAGAATGAGCCATCTGCTCTAAGCAACAAGCATTTTTACTGGCCAATGAGAGAGACAAGAGCCAACTCTTACTCTGCTAGCATCAGCAAAGTTCCATCTGAAAAGAAGCAAGAGCCTAGTTCGGCTGGCTGCAGATTGTTTGGAATCGAGATAAGCTCTGCTGTGGAAGCTACATCTCCACTGGCTGCTGTTTCTGGTGTTGGTCAAGACCAACCAGCTGCCTCAGTAGATGCTGAGTCTGATCAGCTCTCACAACCATCACATGCCAACAAATCTGATGCTCCAGCGGCAAGCAGTGAGCCATCTCCTCATGAGACTCAGAGTCGGCAAGTGAGGAGCTGCACCAAGGTCATCATGCAAGGAATGGCAGTTGGAAGGGCAGTGGACCTGACAAGGCTCCATGGATATGATGATCTTCGCTGCAAGTTAGAAGAGATGTTTGATATCCAAGGAGAGCTCTCTGCTAGCCTAAAGAAATGGAAGGTTGTTTACACAGATGATGAGGATGATATGATGCTGGTTGGGGATGACCCTTGGCCTGAATTTTGCAGCATGGTGAAAAGGATATACATCTACACCTACGAGGAAGCCAAGCAACTTACTCCCAAGTCGAAGCTGCCGATCATTGGCGACGCCATCAAGCCAAACCCAAACAAACAATCGCCCGAGTCTGACATGCCTCACAGTGACCTGGACAGCACCGCCCCCGTCACCGATAAGGATTGCTGA
>LOC_Os02g41800.1
ATGATCACGTTCGCGGACCTGGCGGAGCCGGCGCCCGGCGCCGAGCGGTGCGTCGACCGGCAGCTGTGGCTGGCGTGCGCGGGGGGCATGTGCACCGTGCCGCCGGTGGGCGCCGCCGTGTACTACTTCCCGCAGGGGCACGCCGAGCACGCGCTCGGCCTCGCCGCGCCGGAGCTCTCCGCGGCGCGCGTCCCGGCGCTCGTGCCCTGCCGCGTCGCGTCCGTGCGGTACATGGCCGACCCGGACACCGACGAGGTGTTCGCCAGGATCCGCCTCGTGCCGCTCCGCGCCGCGGAGGATGGGGACGTCGAGGAGGATGGCGCCGCGGCAGGCGAGGAGCACGAGAAGCCGGCGTCGTTCGCCAAGACGCTGACGCAGTCGGATGCCAACAACGGCGGGGGGTTCTCGGTGCCCAGGTACTGCGCCGAGACCATCTTCCCGCGCCTGGACTACGCCGCCGACCCGCCCGTGCAGACCGTCGTCGCCAAGGACGTCCATGGAGTCGCCTGGAACTTCCGCCACATCTACAGGGGCACGCCGCGCCGGCACCTGCTCACCACGGGGTGGAGCACGTTCGTGAACCAGAAGAAGCTCGTGGCCGGCGACTCCATCGTGTTCCTCCGCGGCGACGGAGGGGACCTGCACGTCGGCATCCGGCGCGCCAAGCGCGGGTTTTGCGGCGGCGGAGGCGGAGCCGAGGAGGCCTCCCTGCCCGGGTGGGACCAGTACGGCGGCCTGATGCGAGGCAATGCGAGCCCGTGCGCGGCCGCCAAGGGGCGGGGCAAGGTGCGCGCGGAGGACCTCGTCGAGGCGGCGAGGCTGGCGAACGGCGGGCAGCCGTTCGAGGTCGTGTACTACCCGCGCGCCAGCACGCCGGAGTTCTGCGTGCGCGCGGCGGCGGTCCGCGCGGCGATGCGGGTGCAGTGGTGCCCCGGGATGCGGTTCAAGATGGCGTTCGAGACCGAGGACTCCTCCCGGATCAGCTGGTTCATGGGCACCGTCGCCAGCGTCCAGGTCGCCGACCCCATCCGTTGGCCGCAGTCGCCGTGGCGGCTTCTCCAGGTGACCTGGGACGAACCGGACCTCCTCCAGAACGTGAAGCGGGTGAGCCCATGGTTGGTCGAGCTGGTGTCGAGCATGCCGGCCATCAACCTCTCGTCTTTCTCGCCGCCGCGCAAGAAGCCCCGGATTCTGGCGTACCCGGAGTTCCCCTTCGAGGGGCAGCTCCTCAACCCGGCGTTCCCGCCAAACCCGCTGGCACACGGCCACCACCATTACCATCACAACCACCCGTCCTTCTTCCCGTTCCCCGACGTTAGTGCTCCTGCAGGCATACAGGGAGCCAGGCATGCGCAATTTGGTCCATCTTTATCAGATCTCCACCTTACCCACCTGCAGTCGAGCCTCATGTACCCGGGGCTCCGCCGCCCCGATCATGTCGGTCCAACATCCATCCCGCCACCAAGAATCAGCACTGACCTGACAATGGGCAGCTCGCCGCCGGCGCGCGCTCTGTCCATGGGCGCCAAGAAGCCCGACGACGCCAAGCCGCCGGGGCTAATGCTGTTCGGGCAGAGGATACTGACCGAGCGCCAGATGAGCCTTAGCGGCACCACCTCGCCGGCGGCCACCGGGAACAGCTCTCTCAACTGGAACACCGAGAAAGGTGCCTCGGAGGGCTCGGGCTCCGGCGTCATCCAGAACAGCCCCACCGACAACACGTCGTCGGAGAGGCTCCAGTGGTTCAGGGAGAACAGCACCGTCTCCGAGCTCGGGCTGGAGCCCGGGCAGTGCAAGGTGTTCATCGAGTCCGACACGGTCGGCCGCAACCTCGACCTCTCGTCGCTGGCCTCGTTCGAGCAGCTCTACGGCCGGCTGTCCGAGATGTTCTGCATCGACAGCGCGGAGCTGAGGAGCCGTGTGCTCTACCGTGGCGCCACCGGCGAAGTGAGGCACGCCGGCGACGAGCCATTCAGCGAGTTCATTAAGTTGGCGAGGAGGCTTACCATACTAACCGACGCCGGGAGCGACAACTTAGGGAGCTAG
>LOC_Os04g36054.1
ATGGCCGCCGCGATGGAGATGGCGGCGAATCCAGGTGGTTCAGGAACCTGCAGCGATGCACTATTCCGGGAGCTATGGCATGCTTGTGCTGGTCCGTTGGTCACGGTCCCGAAGCGCGGCGAGCGCGTCTACTACTTTCCCCAGGGTCATATGGAACAGCTTGAGGCGTCTACAAACCAGCAGCTTGACCAGTACCTGCCGATGTTCAATCTACCATCCAAGATCCTATGCAGCGTGGTCAACGTAGAACTCCGGGCGGAGGCTGATTCAGATGAAGTTTATGCTCAAATTATGCTGCAACCAGAAGCTGATCAAAGTGAACTCACCAGTCTGGATCCTGAGCTTCAAGATCTTGAGAAATGCACAGCTCATTCCTTTTGCAAGACATTAACAGCTTCAGATACAAGCACACATGGCGGTTTCTCTGTTCTTAGGAGGCATGCTGAAGAATGCCTTCCTCAGCTGGACATGTCTCAGAATCCACCATGTCAAGAACTGGTTGCCAAAGATCTCCATGGAACTGAGTGGCATTTCCGTCACATCTTTCGTGGACAACCTAGGAGGCATCTGCTTACAACCGGTTGGAGTGTCTTTGTTAGCTCAAAAAGATTGGTTGCTGGCGATGCATTTATCTTCCTGAGGGGCGAAAGTGGTGAGCTACGGGTTGGAGTAAGGAGACTTATGAGACAAGTAAATAACATGCCATCATCTGTCATATCAAGCCACAGCATGCATCTTGGAGTCCTTGCAACAGCTTCCCATGCTATCTCCACTGGAACCCTCTTTTCTGTTTTCTACAAACCCAGAACAAGCCGGTCTGAGTTTGTTGTGAGCGTTAACAAGTACCTTGAAGCTAAGAAGCAGAACTTGTCTGTTGGAATGAGGTTTAAGATGAGATTTGAAGGTGATGAAGCTCCTGAAAGAAGGTTTAGTGGAACAATTATTGGTATTGGGAGTGTGCCAGCAATGTCAAAATCTCCATGGGCAGATTCTGACTGGAAATCTCTGAAGGTCCAATGGGATGAACCTTCGGCTATTGTCCGTCCAGATAGAGTTTCACCATGGGAACTGGAACCATTGGATGCGAGTAATCCACAACCACCTCAGCCTCCATTGAGGAATAAGCGTGCAAGGCCTCCAGCTTCACCTTCTGTGGTTGCGGAACTTCCTCCAAGTTTCGGACTATGGAAACCCCCATCTGAAGCAGCCCAAACTCTCTCATTTTCGGAACCACAACGGGCTCGAGAGATATTTCCTTCAATTCCTGCATCAATCTTCTCAGCATCATCACATGTTGAATTCAATTCAAAGAACGAGCCATCCATACTAAGCAATCAGTTCTACTGGTCAATGAGGGATTCAAAAACTGATTCTTTTTCTGCTAGCACTAACAAAACAAGAGTTGAAAGAAAGCAAGAACCAACTACTATGGGTTGCAGATTATTTGGAATTGAAATAAGCTCAGCTGTAGAAGAAGCCCTGCCTGCAGCTACTGTTTCAGGTGTCGGTTATGATCAAACTGTTCTCTCTGTAGATGTGGACTCTGATCAGATCTCACAGCCATCTAATGGCAATAAATCCGATGCCCCTGGAACAAGCAGTGAACGTTCTCCTCTTGAGTCCCAAAGTCGTCAAGTGAGGAGCTGCACAAAGGTAATTATGCAAGGTATGGCAGTTGGGAGGGCTGTGGACTTGACAAAACTAAATGGTTATGGTGATCTTCGCAGCAAGTTGGAGGAGATGTTTGATATACAGGGGGACTTGTGTCCCACCCTGAAGAGATGGCAAGTTGTTTACACCGATGATGAGGATGACATGATGCTTGTCGGGGATGATCCTTGGGATGAATTTTGTAGCATGGTGAAACGGATTTATATTTACTCCTACGAGGAGGCCAAGCTGCTGGCTCCAAAGTCTAAGCTGCCAGTCATAGGTGACACCATCAAATTGAGCAGTATGAACTCATCACATGAATCCGTCGACCTGGACAATCATGCCTCAGTTACTAACAGGGACTGCTAA
>LOC_Os04g43910.1
ATGGAGCTCGCGGGGCCGACGGAAGGCGACGGCGGCGGGTCCGTGGACTCCCAGCTGTGGGCGGCGTGCGCGGGGAGCATGTCGTCGGTGCCGCCCGTGGGCGCGGCGGTGTACTACTTCCCGCAGGGCCACGCGGAGCAGGCGAGCGCGGCCGTGGACCTGTCGTCCGCGCGCGTCCCGCCGCTCGTGCCGTGCCGGGTTGTCGCCGTGCGGTTCATGGCCGACGCGGAGAGCGACGAGGTCTTCGCCAAGATACGCCTCGTCCCGCTACGCCCCGGCGACGCGGTGGTGGACGTGGGCGAGGCGGCCGCGGCCGAGGCGCGGCGGGAGGAGGAGAATAGTAGGCCGAGGCCGACGTCGTTCGCCAAGACGCTGACGCAGTCCGACGCGAACAACGGCGGGGGGTTCTCCGTGCCGCGGTTCTGCGCCGAGACCATCTTCCCGGAGCTGGACTACAGCAGCGAGCCGCCCGTGCAGTCCGTCTGCGCCAAGGACGTGCACGGTGTGGAGTGGACGTTCCGGCACATCTACCGGGGCACCCCGCGCCGGCACCTGCTCACCACGGGGTGGAGTCCCTTCGTCAACAAGAAGCAGCTCACGGCCGGCGACTCCATCGTGTTCATGCGTGACGAGGGCGGGAACATCCACGTCGGGCTCCGCCGCGCTAAACGCGGGTTCTGCAGCATCGGCGGCGACGACGAGAGCCTCTCCTCGATTCCCGGGTGGGACCAGTACAGGGGCTTGATGCGGCGCAATGCGACCGCGACCGCGACCGGTGGGAGAACCCCGCCCAAGGGGAAGGTCCCGCCGGAGAACGTGCTCACGGCGGCGACGAGGGCCACCACCGGGCAGCCGTTCGAGGTGCTGTACTACCCGCGGGCGAGCACGCCCGAGTTCTGCGTGAGGGCGGCCGCGGTCAGGACGGCCATGGCCGTGCAGTGGTGCCCCGGCATGCGGTTCAAGATGGCGTTCGAGACAGAGGACTCGTCGCGGATCAGCTGGTTCATGGGCACTGTCGCCGGCGTCCAGGCCTCCGACCCCGTCCGTTGGCCGCAGTCGCCATGGCGTCTCCTTCAGGTGACCTGGGACGAGCCGGAGCTCCTACAGAACGTAAAGCGCGTGTGCCCGTGGCTGGTGGAGCTCGTGTCGAGCATGCCCAACCTCCACCTGCCATCCTTCTCGCCGCCGCGCAAGAAGCCGCGCAACCCGCCTTACGCGGAGCTCCCCCTCGAGGGCCAGATCTTCACCGGCCCGGTGTTCCCGCCCAATCCAATGGCGCACGACCACCACCACCACCATGGTTTCCCTTTCCTCCCCTTCCCGGACAGTAGTGCTCAACCTGCAGGCATACAGGGAGCCAGGCATGCGCAGTTCGCTTCACCGTTCCCGGAGTTCCACATCGGCAACCTGCAGCCGAATCTGATGCTCTACGCCGGCATCCGCCTCCCGCCCGCCGATCGCGCCGCCCCCGCTCCTCGCCCGCCGAGAATCATCATCAGCACCGACCTGACGATTGGCAGCCCGGGTAAACCCGACGACGCCGCGTGCTCTCCCTCATCCGGCGGCAAGAAGATCGACGACACCAAGCCGCGGGGGTTTCTCCTCTTTGGACAGGCAATTCTAACCGAGGAGCAGATCAAGAACGGCAACTCCGATGGTCGTCCGGCCTCGCCGAACTGGGACGCCGAGAAGGCGCCTAACACCTCGGAAGGCTCCGACTCCGGCGTCACCCAGGGCAGCCCCACCAAGAACACCACGCCGTCGTGGAGCCTACCGTATTTTGGAGGCAACAACATCAGCCGCGCATCCGAGTACGAGCTGAATCCCGGGCAGTGCAAGGTGTTCGTCGAGTCGGAAACCGTCGGCCGGAGCCTCGATCTCTCGGCGCTGAGCTCGTTCGAGGAGCTGTACGCCTGCCTGTCTGATATGTTCAGCATTGGCAGCGATGAACTGAGGAGCCATCTGGTGTACCGCAGCCCCGCCGGCGAAGTCAAGCACGCCGGCGACGAGCCATTCTGCGCGTTCGTGAAATCGGCGCGTAAGCTTAGGATACTGACAGATGCTGGCAGTGACAACCTGGGAGATTAG
>LOC_Os04g56850.1
ATGGCGTCCTCGCAGGAGAAGGCCAAGACGGGTGTTCTGAGAAATGCCGCAGCGCTGCTCGACGAAATGCAGCTCATGGGAGAAACACAGGGTGCCAAGAAGGTGATCAACTCGGAGCTCTGGCACGCTTGTGCCGGGCCGCTTGTGTGCTTGCCGCAGCGGGGGAGCCTCGTGTACTACTTCCCTCAGGGGCACAGTGAACAGGTTGCAGCGACAACTAGAAAGATTCCAAATTCCCGCATTCCGAACTACCCAAACCTGCCATCTCAGTTGCTGTGTCAAGTTCACAACATCACCTTGCATGCCGACAAGGACACTGATGAAGTTTATGCACAGATGACCCTTCAGCCAGTAAACTCTGAAACGGATGTATTCCCTATTCCAACTCTTGGTGCTTATACCAAAAGCAAGCACCCCACTGAATATTTCTGCAAGAATTTAACCGCAAGTGATACGAGTACACATGGTGGTTTCTCGGTGCCACGAAGGGCTGCAGAGAAGTTGTTCCCACAACTGGATTACTCAATGCAACCTCCTAACCAGGAGCTTATTGTTCGAGATTTGCATGATAACATGTGGACATTCCGTCACATTTATCGTGGACAGCCAAAACGACATCTTCTAACAACTGGATGGAGTCTCTTTGTTGGGGCAAAGCGTCTAAAAGCAGGGGACTCTGTCTTATTTATAAGGGATGAGAAGTCACAACTTCTTTTGGGTGTTAGGCGAGCCACGCGACAACAAACAATGTTGTCATCTTCTGTTCTATCTACTGATAGCATGCACATTGGCGTTCTTGCTGCTGCAGCTCATGCCGCATCAAGTGGTAGTTCATTTACTATCTACTACAATCCTAGGACAAGTCCTTCGCCATTTGTAATTCCTGTAGCAAGGTACAACAAGGCAACATATATGCAACCATCAGTTGGAATGAGATTTGCGATGATGTTTGAGACAGAGGAGTCAAGCAAGCGCAGATACACAGGTACAGTTGTGGGAATAAGTGACTACGACCCCATGAGATGGCCCAATTCTAAATGGCGCAACTTACAGGTCGAATGGGATGAACATGGGTATGGAGAAAGACCTGAGCGTGTGAGCATATGGGATATTGAAACTCCAGAAAACACTCTTGTGTTCCCTTCGTCGACCTTGAATTCAAAGCGGCAATGTCTTCCTGGTTATGGAGTTTCAGTGCCTGGGATGGAAATTGGATCAGCAAATATGTCATCATTTCCAAGGGCTCAGGGTAATCCCTATGGCAGTTTGCAGCACATTCCAGCTGTTGGATCAGAATTGGCTATCATGCTTCTCAACCAATCTGGTCAAACCCTTGGGAGTCCCCTTAGTTTTCACCAGTCCTCATATTCTAGTATTATCCAAAATGTGAAGCAAAATTATATCCCTCCTCTAACAGTTAGCACTTCAGCTTGTTTGACAAAGCAAGAAAGCCTGCCTTCAGATGATGCCCAGCACCAGTTCCATATGGCAAATATGCAGAATGGTGATCTTGAAGGCTCTGAAGTCCAGCCTGTCATTGATTCGATTTCTGAGTCAAAGTTGAATGCTACATCAAGAGATCCAAGAAACACAGATTCATACACAAGTCGAAGTACTTCGGAGCAAAACAGTAAGGGTGAGCCTAGAGGCAAGACTCGTAGGAGTAAGAAGGGCTTGCCTCACAAAACCGTTTCAGAGAAATCTGACCTTTCTTCAGCCCCTTCTTGGATCTGTGACAATCAGCAGGTTGGTTTAGAATCGAAACTGGTTGGTTGTGATGAACAAGTAAACTGTGGAAATATTGAAGATTCATCAGGTGCACTTACTCAAGGTAATTTTGTTGGACAGCCGCATGGCCATCAGGTTGAACAAAAGGGAGTGCTGTCGCCACCAAAGGTAGAATCATCAAAATCACCTGATGGAGGAAAGTCTGTCAATTCGTTTCCAAACCAAGGGTGTTTTTCGCAGTTCATTGATGGTCTTGATTGGATGACTCAGCCTTCCTACTACCAAGACTCCAATGTAATTCAACCAGCCGGTGTGTCAGAGAACATTTTCAGTTCTTCTGCAGATATACCTCCCTCAATGATTGCTGATACTATGGAGACTTTTCAGGCTTCATGTCTTTCTGATTGCCTTCCTAATTCCATACAAGAATTCATCTCCAGCCCAGATCTGAATTCACTAACCTTTCTTTCACCTGACATGCAAAATTTGGAGGTCCAACTCCAGCATGATGGAAGCAATTTGCCAAGCACGTCCAACTCGTTTGTACAGATGAGTTTTTCTGAAGAGAGTGCAAGTCAGAGTGCAAACTTAAGTGGACTTCACATGGAATCTACACACAGAAGCATAAACACCACTTCATGCTCTCAACCAATGTCTACTGGGGGCTTTGATGCAGGGATGTACTCAAAGTTGCCACGTTTAAAAGAATCCCAAATCTTGTCTTTGCCAGAGATTCATACCAATTCCATGGGAACATCAGCTTGCAGTATGGATGCAACCGAGTACAGCCTTGACCGAAGTGCGAAGCCGATGAAACCACCAGTGCGGACATATACAAAGGTTCAAAAGCAAGGATCAGTTGGAAGATCTATCGATGTTACAGGGTTTAGAAATTACCATGAGTTGAGATCTGCCATCGCTTGCATGTTTGGTCTCCAGGGGAAATTGGAGCATCCTGGCAGTTCAGAGTGGAAGCTTGTATATGTCGACTACGAAAATGATGTTCTTCTTGTCGGAGATGATCCATGGGAGGAATTCATCAACTGTGTCCGGTGCATCCGGATTTTGTCACCTTCAGAAGTACAACAGATGAGCGAGAATGGCATGCATGTTTTGAACGACTGTATTCAAGCAGCTTAG
>LOC_Os04g57610.1
ATGAGCTCGTCGTCGGCGGCCAGCATCGGGCCGCCGCAGCCGCCGCCGCCCCCCGCGCCGCCCGAGGAAGGTGGGTGGCTAGAGAAGAAGTGCCTCAACTCGGAGCTATGGCACGCCTGCGCCGGCCCGCTCGTCTGCCTCCCCACCGTCGGCACGCGCGTCGTCTACTTCCCGCAAGGCCACAGCGAGCAGGTGGCGGCGTCGACGAACAAGGAGGTGGAGGGTCACATCCCGAACTACCCCAACCTGCCGGCGCAGCTGATCTGCCAGCTCCACGATGTCACAATGCATGCGGATGTGGAGACTGACGAGGTGTACGCGCAGATGACGCTCCAGCCACTGAACCCACAGGAGCAGAACGATGCGTACCTTCCCGCGGAGATGGGGATAATGAGCAAGCAGCCGACGAATTACTTCTGCAAGACATTGACGGCGAGCGACACCAGCACGCACGGGGGGTTCTCCGTGCCCCGCCGTGCTGCTGAGCGCGTCTTCCCTCCTTTGGATTTCACACAGCAGCCTCCAGCCCAGGAGCTAATTGCACGGGATATTCATGACATCGAGTGGAAGTTCAGGCACATCTTTCGAGGCCAACCCAAACGACACCTGCTAACCACTGGCTGGAGCGTTTTTGTCAGTGCTAAGAGACTTGTTGCTGGAGATTCTGTGCTTTTCATATGGAACGAGAAAAACCAGCTTTTACTTGGAATAAGACGTGCCAGTCGGCCACAGACTGTGATGCCTTCCTCTGTTCTTTCAAGCGATAGCATGCACATAGGTCTCCTTGCAGCAGCAGCTCATGCTGCTGCTACAAACAGCCGTTTCACTATTTTCTACAACCCCCGGGCAAGTCCATCAGAATTTGTCATACCACTGTCAAAATACATCAAGGCTGTTTTTCACACCCGGATATCGGTTGGGATGCGGTTCAGGATGTTGTTTGAGACTGAGGAATCAAGCGTTCGCAGGTATATGGGGACTATAACTGAAGTTAGTGATGCAGACCCAGTCCGTTGGCCTAGTTCCTATTGGAGATCTGTGAAGGTTGGTTGGGATGAATCAACTGCAGGGGAAAGACCACCAAGAGTTTCTTTATGGGAAATTGAACCATTGACAACCTTTCCAATGTATCCATCTCTGTTCCCACTGAGAGTTAAGCATCCTTGGTATTCAGGAGTTGCTTCCCTGCATGATGACAGCAATGCTTTAATGTGGCTGAGAGGAGTTGCTGGTGAGGGAGGTTTTCAGTCTCTGAACTTTCAGTCACCTGGTATTGGCTCCTGGGGACAACAGAGGCTCCATCCATCCTTACTGAGCAGCGATCACGATCAGTACCAAGCAGTAGTTGCTGCTGCTGCTGCTTCCCAATCTGGTGGTTACTTAAAACAGCAATTCTTGCACCTTCAGCAACCTATGCAGTCCCCTCAAGAACACTGCAACCTCAACCCATTATTGCAGCAACAAATTCTGCAGCAAGCAAGCCAGCAACAGATAATTAATCCTGATGCCCAAAATATCCAAACGATGTTGAGCCCAAGTGCTATACAACAGCAACTCCAGCAACTACAGCAAATGCAGCAAGTTCAGAATGATCAGAAGCAGAAGATTCAACCAGATCAAAGCTACCAAGTTCCTACAAGTGCAGTTCTCCCAAGTCCAACATCATTACCGAGTCATTTGCGAGAAAAATTTGGCTTCTCTGATCCTAATGCGAATTCTTCAAGCTTCATCACCTCTAGCAGTAGTGATAACATGTTGGATTCGAGCTTCCTTCAGGGAAGTTCGAAAGCTGTGGACTTATCTCGATTTAATCAGCCTGTAGCTAGTGAGCAGCAGCAGCAGCAGCAACAGGCATGGAAGCAGAAGTTTATGGGTTCACAGTCAGTGTCTTTTGGGGGCTCGGTTTTGCATAACTCACCCACAAGCAAAGATGGTTCTGTTGAAAACAAAATTGGTCGTGATGTGCAAAACCAGTCCCTTTTTAGTCCACAAGTTGACTCTTCATCCCTCCTGTACAACATGGTTCCTAATCTGACTTCGAATGTTTCGGATGGCAACTTATCAACGATCCCTTCTGGATCAACTTATCTGCAGAATGCAATGTATGGTTGCTTGGACGACTCTTCTGGTTTATTGCAAAATACAGGAGAGAACGATCCAGCAACCAGAACATTTGTGAAGGTTTACAAGTCAGGTTCGGTTGGGAGGTCGTTGGACATAACCCGGTTCTCTAATTATGCTGAACTTCGAGAAGAACTGGGTCAGATGTTCGGCATTAAGGGTCAATTGGACGACCCTGATAGATCAGGCTGGCAGCTTGTATTCGTCGACAGGGAGAATGATGTGCTTCTCCTTGGAGACGACCCTTGGGAGTCCTTTGTGAATAGTGTATGGTACATCAAGATACTTTCACCTGAGGATGTGCATAAGATGGGAAAGCAAGGAAATGATCCACGGTATCTGTCCTGA
>LOC_Os04g59430.1
ATGGCGCGCCCGCCAGCCGCCACCGCTCCGCCTCCTCCTCCGCCGCCGCCGCCACCGCCACCGCCACCGATCGACCGCCTCGTCTGGCTCGCCTGCGCCGCCCCGCTGTCCCGCATCCCCGTCGTCGGCACCCAGGTCTCCTACTTCCCAGAGGGCCACGCCGAGCAGTGTCCCGCCCCTCTCCCGGATCCGCTCCCCTCCGCCCACCGATTCTTCCTCTGCACCATCACCGCCGTCGACCTCTCCGCCGACACCACCACCGGCGAGCCCTACGCCACCATCTCCCTCCTCCCTCTTCGCCACGACGCCCCCGCCCCCGCCCCCGCCCCCGCCCCCGCCGCCGCCGAATTAGCAGAAGCAGAATCACAGGAGTTCCGCTACTACGCCAAGCAGCTGACGCAGAGCGACGCCAACAACGGCGGCGGCTTCTCCGTGCCAAGGTTGTGCGCCGATCACATCTTCCCGGCGCTCAACCTGGATGATGACCCGCCCGTCCAGAGCCTCACCATGGGGGACCTGCAGGGCGACTCGTGGGAATTCCGCCACATCTACCGCGGCACGCCGCGCCGGCACCTGCTGACGACCGGGTGGAGCAAGTTCGTGAACGCCAAGCAGCTGGTGGCCGGGGACACGGTGGTGTTCATGTGGTGCGGGGCCCCGGCCCCCGAGAGGAAGCTGTTGGTCGGGGTGCGACGCGCGGCCAGGTACTCGGGCGAGTCGGCGTGCAACGCGCGGGGGCGGGTGCAGCCCCAGGAGGTGATGGAGGCGGTCCGACTGGCGGCGGAGCAGGCGGCGTTCAGGGTGACCTACTACCCGCGGCATGGGGCGGGGGAGTTCGTGGTGCCGCGGGTGGAGGTGGATAAGGGATTGACTACTCCGTGGAGGTGCGGGATGCAGGTGCGCGCCCAGGTGATGGAGGCCGAGGACACCCGCCGCCTCGCTTGGCTCAATGGCACCCTCACTAACCTCCGCCACCAACAAATCTGGCGCACTCTCGAGGTTGAATGGGATGCCTCCGCCGCGTCATCTTCCATGAAAAACAGATTTGTTAATCCTTGGCAGGTCCAGCCTGTTGATTTCCCTCCTCTTCCCATGGGGCTAAAGATTTCTAACAACAATATTAGTGCACCTGTGTGCAATGGGGATTCACTGCTGGTGCCACCGATACTAATGCACCCGCAACCTCAACCTCCCGCTGACATTCAGGGAGCCAGGCATAACAATGGCCATGCCTATGCAGATATACCCTCTTCATCAACACCATCAATGGTGAGGACTCAGCAGCTGTTCCCAAGGGATCTTCAGATTTTAGTTCCCCACACCGACATTGTCACTCCTCAAAATGGATCACCGCCCGACAACCCCGTAAACACGCCTCTTTCTGCATCTGACGGAATGAAGACCATACAGCTGTTTGGCGTCACAATAACATCACCTGTGCAAGGAGACACCAATGGCGCTTTCGCTTCAGCACAAGTGAATCAGGTTCCAGAGGGTGTAGATGATGAAACTGCTACCGAAGAAGCTTCTGACACAAGCCTACCTGACTCTCTTACCAATGGCCACAATCAAGATGGTGCTAGGCTTTGA
>LOC_Os05g43920.1
ATGGGGATTGACCTGAACACGGTGGAGGAGGAAGCGGAGGAGGGGGCGGCGGCGGCGGTGTGCGGGGAGCTGTGGCACGCGTGCGCGGGGCCAGGGGTGGCGCTGCCGCGGCGCGGCAGCGCGCTCGTGTACCTGCCGCAGGCGCACCTCGCCGCGGACGGCGGCGGCGGCGAGGTGCCGCCTGCCGGCGCCGCGGCCGTGCCCCCGCACGTCGCGTGCCGCGTCGTCGGCGTCGAGCTGCGCGCGGACGCGGCGACGGACGAGGTGTACGCGCGGCTCGCGTTGGTGGCGGAGGGCGAGATGTTGCAGCGGAACTTCCGCGAGGGTGGAGGTGAAGATGGTGCAGGGGAGATGGAGGGTTGTGATGCAGAAAAGAAGCCCCGGATGCCACACATGTTCTGCAAAACTCTCACAGCATCTGATACAAGCACCCATGGAGGTTTCTCTGTTCCTCGCCGGGCTGCAGAGGACTGTTTCCCACCTTTGGTGATACACTTAAAAGAAAAACTTGTAACTTTTAATGACTATAAGACAGTTAGACCTTCTCAAGAGCTGATTGCCGTGGACTTACATGGCACACAATGGAAGTTCAGGCATATTTATAGAGGCCAGCCTCGTAGGCATCTTCTAACGATTGGATGGAGCTCATTTGTCAATAGGAAAAAACTAGTCTCAGGGGATGCTGTCTTGTTTCTTAGAGGTGATGATGGCCAACTAAGATTGGGTGTAAGGAGAGCAGTTCAACTTAGAAATGAGGCCCTCTTTGAACCTGTCAACAGCAGCGATTCAAAGCTACGCATTCTATCTTCTGTTGCCAGTTCCTTGGAAAATAAAAGTGTTTTCCACATTTGTTTCAACCCAAGGAGTGGTGCGTCAGAATTCATTGTACCGTATTGGAGATTATTGAAGAGCCTGAACCATCCATTTTCCATTGGAATGAGGTTCAGAGTTTGCTATGAGAGTGAAGATGCTAATGAGAGGTCCGCTGGATTAATTTCAGGCATTAGTGAAGTTGACCCCATAAGATGGCCTGGATCAAGATGGAAATGCCTACTGGTAAGATGGGATGATAGTACAGATAGCAGCCACCAAAACAGAGTTTCTCCATGGGAGATCGAGAGAGTTGGTGGCAGTGTCTCGGTTACCCATTCCTTGTCATCTGGGTCTAAGCGAACCAAATTGCACTTTCCTCAAGGCAGTTTGGATACTCCATTTCTTAATGGAAATGGTCACCCGGACTCCATGGGAACTGAAAATTTCCACAGGGTCTTGCAAGGTCAAGAATTTAGGGGTTCTAGGTCCCATGGTGTTGTATGCTCTGAATCACCTGGTGTACCAAACTTTCAATCTCCTGACAATAGGAGATTTTCTGCTGATATGCGGGGCTACATGATGCCAGCAAGTGGGCCCCCACAGCGGAACACAGAGTTTACTTATCAGCCCATAGGCTTCAGTGAGTCTCTTGGATTCCCAGAGGTCTTGCAAGGTCAAGAAATGTCACAAGTAGTTCCTTTGTTCCGAGGAGCTACTTTTGGCGCTCGTACACAGAATGACAGAGTTGTCTCTGCTAATTCTGTGCATAGATCAGCTGCACAGAGTGGATTGCTAGCTTCAACTCTAGGGCATCCCATCTCGCAGTTTACTCTGTCATCGTCAAAGGTATCTTCTCCCTCGTCGGTTCTGATGTTTAACCAAGCGACAGCTCCAAATCATGAAACAGTAAGCGGAACCAACAACAAAGGTATGCATGTCAGCCAGTTTGCTTCCCAGGAGATGCTCTCAGAAACTGTAACCTGGCCCGGCACACAACGTCAAACGCCGAGCGAAATCACGAGCAACCAGTTCGCCCTGGCGAGAATCCCAGCTCCTCCAAGCGGAGCTGAATCCGGATTGCCCAAGAGGGATGCCGGGAGAAGCAGCTGCAGACTGTTTGGCTTCTCCCTGACAGGCAACATGCTGGGAGAAGATGGAGAAGGCCTAGATGATGGAGCCATTGAAGCTGGTTGCGAAAACCCGCCCGTGCTGGAGCTGTTTGGGCACAGCCATTCTACTCCCGGTGCTCTTCATGCCCTGTGTGCTGCTGCTCCCCTGGGAATGTGA
>LOC_Os05g48870.1
ATGACCGGGATCGACCTCAACACCGTCGAGGAGGACGAGGAGGAGGCGGCGGAGGAGGTGGCGGCGAACGGCTCGTCTCCGGCTCCGGCGAGGGCGGGCGCGGTGTGCCTCGAGCTGTGGCACGCCTGCGCCGGGCCCGTGGCGCCGCTGCCGAGGAAAGGGGGCGTCGTCGTGTACCTGCCGCAGGGGCATCTCGAGCACCTCGGCGACGCGCCCGCGGCGGCGGCGGCCGCGGCCGCCGTGCCGCCGCACGTCTTCTGCCGCGTCGTCGACGTCACCCTCCTCGCGGACGCGGCGACCGACGAGGTGTACGCGCAGCTCTCGCTTGTCCCGGAGAAGGAGGAGGTGGCGAGGCGGGCGGACGACGGCGAGGGCGAGGACGGGGACGGCATGAAGCAGCGGTTCGCGCGGATGCCGCACATGTTCTGCAAGACGCTCACGGCGTCCGACACCAGCACGCACGGCGGCTTCTCCGTGCCGCGCCGCGCCGCCGAGGACTGCTTCCCTCCACTGGATTACAGCCAGCAGCGGCCGTCGCAGGAGCTTGTTGCCAAGGATTTGCACAGCACTGAATGGAGGTTCCGCCATATTTACCGAGGCCAGCCACGTCGGCACCTTTTAACCACAGGTTGGAGTGCATTTGTTAACAAGAAGAAGCTTGTTTCTGGGGATGCCGTACTATTTTTGCGAGGTGATGATGGGGAGCTAAGACTGGGAGTTCGCCGTGCAGCTCAGCTTAAAAATGGGTCTGCTTTTCCAGCACTTTACAACCAGTGTTCTAATCTTGGTACACTTGCCAATGTTGCACATGCAGTGGCTACAGAAAGTGTGTTCAACATATACTACAATCCCAGGTTAAGTCAGTCCGAATTCATTGTACCCTACTGGAAGTTCATGAAAAGCCTCAGCCAACCATTTTCTGTTGGGCTGAGGTTCAAAATGAGATATGAAAGTGAAGATGCTACTGAAAGAAGGTACACCGGGATAATTACTGGAAGTGGTGATACAGACCCTATGTGGCATGGTTCGAAATGGAAATGTTTGTTGGTGAGGTGGGATGACGACGCTGAGTTCCGTCGACCAAACAGGGTCTCTCCTTGGGAGATTGAGCTGACTAGTTCAGTGTCAGGATCCCATTTGTCCACACCCCATTCAAAGCGATTGAAACCATGTCTTCCCCATGTTAATCCAGAATACATGGTTCCACGTGGAGGTGGTTGTCCTGATTTTGCGGAATCTGCCCAATTCCACAAGGTCTTGCAAGGTCAAGAATTATTGGGTTTTAAATCTCATGGTGGTACTGCTGCTGCTACTTCTCAGCCATGTGAAGCAAGGCATTTACAGTACATCGATGAGCGGAGTTGCTCCAGCGATGCGAGTAACAGTATCCTAGGGGTTCCAAGACTTGGTGATAGAGCACCACTTGGAAACCCAGGATTTTCCTACCATTGCTCAGGCTTTGGGGAGTCTCACAGACTCCAAAAGGTCTTGCAAGGTCAAGAATTATTTCGTCCCTACCGAGGAACTTTGGTTGATGCGTCTATGGGTAGTAATGGGTTTCATCAACAAGATAGTCCTCGTGCACCAGGTGTGGTGAATAAATGGCAGGCACAACTTCATGGCCGTGCTGCTTTTCATGGACCACCAGCACTGGCTCTTCCATCTCAATCATCATCTCCGCCATCTGTCCTAATGTTTCAGCAAGCTAATTCAAAGATGCCCAGGTTGGAGTTTGGGCATGGACAGTTGGACAAGCACGAGAATGATAGGCGTGTTAGGTTTGGTCCTTCTGAAGGAATTGAAAGAAGAGAGCAAAGAATACCACTCCAGCCTTATCCTACTTCTGGAGAAGTGATAGATGGACAGGTTACAGTTGAGAAGTCTCACTCCCCTGGTCGACATGGAAAGGATGGTCCAGATAACAAAGCTGTTGGCACAAATAGTTGCAAAATATTTGGCATCTCTTTGACTGAGAAGGTTCCAGCAAGAGAAGAACTAGATGATGGCGACGCCAACTATTCACTCCAGTCTTTGAAGCAAGTGCCAAAATCCCTGGGCAATAGTTGTGCTACCGTTCATGAGCAAAGGCCTGTTGTTGGCAGGGTGATTGATATTTCAACTATGGATATGATGATCTGA
>LOC_Os06g09660.1
ATGAAGGATCAGGGATCATCCGGTGTGTCTCCCGCCCCAGGGGAAGGGGAGAAGAAAGCCATCAATTCGGAGCTATGGCATGCTTGTGCCGGGCCTCTTGTGTCGCTGCCGCCGGTGGGCAGTCTCGTCGTGTACTTCCCTCAGGGTCATAGCGAGCAGGTTGCTGCTTCCATGCACAAGGAGCTGGACAACATCCCTGGTTATCCCTCTCTTCCGTCTAAGCTGATCTGCAAACTTCTGAGTCTCACCTTACATGCAGATTCTGAAACTGATGAAGTTTATGCTCAGATGACACTTCAACCAGTCAATAAATATGATCGAGATGCAATGCTGGCATCTGAACTGGGCCTGAAGCAAAACAAGCAACCAGCGGAGTTCTTTTGCAAAACGCTGACGGCGAGCGACACAAGTACCCATGGTGGATTTTCAGTGCCACGTCGTGCGGCGGAGAAGATATTTCCACCACTAGACTTTACCATGCAACCACCAGCACAAGAGCTCATCGCCAAGGATCTGCATGATATTTCATGGAAATTTCGACACATTTACCGAGGTCAACCAAAGAGGCACCTTCTGACAACTGGTTGGAGCGTCTTTGTCAGCACAAAAAGGCTTCTAGCTGGTGATTCAGTTCTGTTTATAAGGGATGAGAAATCTCAGCTTCTATTAGGCATACGTCGTGCTACCAGACCCCAACCAGCTCTATCGTCATCAGTTCTATCAAGTGATAGCATGCACATTGGGATTCTAGCTGCTGCAGCACATGCTGCTGCAAACAGTAGCCCATTTACTATTTTCTACAATCCAAGGGCAAGTCCATCAGAATTTGTCATTCCTTTAGCGAAATATAACAAGGCTTTGTATACACAAGTATCTCTTGGAATGCGGTTCAGAATGCTGTTTGAGACAGAGGATTCAGGGGTTCGAAGATATATGGGAACAATCACAGGTATTGGTGACTTGGATCCAGTGCGCTGGAAGAACTCTCATTGGCGAAACCTTCAGGTTGGTTGGGATGAATCAACAGCATCTGAGAGGCGCACTCGTGTTTCAATATGGGAGATTGAACCAGTCGCGACACCTTTTTATATTTGTCCACCACCATTTTTCAGGCCAAAACTTCCTAAGCAGCCAGGAATGCCAGATGATGAAAATGAAGTTGAGAGTGCTTTCAAAAGAGCCATGCCATGGCTTGCTGATGACTTTGCCCTGAAAGATGTGCAAAGTGCATTATTTCCAGGTCTGAGCCTAGTCCAATGGATGGCTATGCAACAGAATCCTCAGATGCTAACAGCTGCGTCCCAAACAGTGCAATCACCGTACTTGAACTCCAATGCATTGGCTATGCAGGATGTGATGGGTAGTAGCAACGAGGACCCAACAAAAAGATTGAACACACAGGCACAAAATATGGTTTTACCTAATTTACAGGTTGGCTCAAAAGTGGATCACCCTGTAATGTCTCAACATCAACAGCAGCCACACCAACTATCACAACAGCAGCAGGTCCAGCCATCGCAGCAAAGTTCTGTGGTTTTACAGCAACATCAAGCCCAGTTGCTGCAGCAGAACGCCATTCACTTGCAGCAGCAGCAAGAACATCTCCAGCGGCAGCAGTCACAACCGGCACAGCAGTTGAAGGCTGCTTCAAGTCTGCATTCAGTGGAACAGCACAAGCTGAAAGAACAGACTTCAGGTGGGCAGGTTGCCTCACAAGCACAAATGTTAAACCAGATTTTCCCACCATCTTCATCGCAGCTACAACAGTTAGGTTTACCCAAGTCACCTACTCATCGCCAAGGGTTGACAGGATTACCAATTGCAGGTTCTTTGCAGCAGCCCACACTAACTCAGACATCTCAAGTCCAGCAAGCAGCCGAATATCAGCAGGCCCTCCTACAGAGTCAGCAACAGCAACAGCAACTGCAACTGCAACAACTATCACAACCAGAAGTACAGCTGCAGCTGCTTCAAAAGATTCAACAACAAAACATGCTATCTCAGCTGAACCCACAACATCAGTCCCAGTTGATTCAACAATTGTCTCAGAAAAGCCAGGAAATTCTACAGCAACAAATTTTGCAACATCAATTTGGTGGGTCTGATTCTATTGGTCAACTCAAGCAATCACCATCGCAGCAAGCTCCTTTAAACCACATGACAGGATCTTTGACGCCCCAGCAACTTGTCAGATCACATTCGGCACTTGCTGAGAGTGGGGATCCATCCAGTTCAACTGCTCCATCCACCAGCCGTATTTCTCCAATAAATTCGCTGAGTAGGGCAAACCAAGGAAGCAGAAATTTAACTGACATGGTGGCAACACCACAAATTGACAACTTACTTCAGGAAATTCAAAGCAAGCCAGATAATCGAATTAAGAATGACATACAGAGCAAAGAAACAGTCCCTATACATAACCGACATCCAGTTTCTGATCAACTTGATGCATCATCTGCTACCTCCTTTTGTTTAGACGAGAGCCCACGAGAAGGTTTTTCCTTCCCTCCAGTTTGTTTGGATAACAATGTTCAAGTTGATCCAAGAGATAACTTTCTTATTGCGGAAAATGTGGACGCATTGATGCCAGATGCCCTGTTGTCAAGAGGTATGGCTTCAGGAAAGGGCATGTGCACTCTGACTTCTGGACAAAGGGATCACAGGGATGTCGAGAATGAGCTATCATCTGCTGCATTCAGTTCCCAGTCATTTGGTGTGCCTGACATGTCCTTTAAGCCTGGATGTTCAAGTGACGTTGCTGTTACTGATGCCGGAATGCCAAGCCAAGGTTTGTGGAATAATCAAACACAACGGATGAGAACTTTCACTAAGGTTCAAAAGCGTGGTTCTGTGGGGAGATCAATTGATATCACAAGATATCGAGATTATGATGAACTTAGGCATGATCTTGCATGCATGTTTGGTATCCAAGGTCAACTTGAAGATCCATATAGGATGGATTGGAAGCTAGTCTATGTTGATCATGAGAATGATATCCTTCTTGTCGGCGACGACCCTTGGGAGGAATTTGTGGGCTGTGTGAAGAGCATCAAAATACTCTCAGCTGCTGAAGTACAACAGATGAGCTTGGATGGTGACCTTGGTGGCGTCCCTCCACAAACACAGGCCTGTAGTGCCTCTGATGATGCAAATGCATGGAGAGGTTGA
>LOC_Os06g46410.1
ATGAGGCTTTCGTCGTCGTCCGGCAGCGTCCTCCCGGCTCAGGCGGCGTCGCCGGAAGCTGTAGAAGAACAAAAATGCCTGAATTCGGAGCTCTGGCATGCGTGTGCCGGTCCCCTTGTTTCGTTGCCTGCAGTGGGTAGCCGAGTGGTTTATTTCCCACAGGGTCACAGCGAACAGGTAGCTGCATCAACAAATAAAGAAATGGAGTCTCAGATCCCCAATTATCCTAACTTGCCTCCACAACTTATTTGCCAACTTCACAATGTGACGATGCATGCAGATGCAGAAACAGATGAGGTTTACGCTCAGATGACGCTACAACCACTTAGCCCGCAAGAGCTCAAGGACCCATATCTACCAGCTGAATTAGGTTCTGCCAACAAACAGCCAACGAATTATTTTTGCAAAACATTAACGGCAAGTGACACAAGTACGCATGGCGGATTCTCTGTTCCCCGTCGAGCAGCTGAGAAAGTGTTCCCTCCGCTGGATTTTACTCAGCAGCCTCCAGCACAGGAGTTAATTGCAAAAGATCTTCATGGCAATGAGTGGAAGTTTCGTCATATCTTTCGTGGTCAGCCAAAGCGACACCTTCTAACTACAGGCTGGAGCGTCTTTGTAAGTGCAAAGAGACTTGTCGCCGGGGATTCTGTCCTATTTATCTGGAATGACAACAACCAGCTTCTTCTGGGAATTCGTCGAGCTAACCGCCCACAAACTGTTATGCCATCTTCAGTCCTATCTAGTGATAGCATGCATATTGGTCTTCTTGCTGCGGCTGCTCATGCTGCTTCAACAAATAGCCGGTTTACAATTTTTTATAACCCAAGAGCAAGCCCTTCAGAGTTTGTTATCCCACTTTCTAAATATGTTAAGGCTGTATATCATACCCGTATATCTGTGGGCATGCGTTTCAGGATGCTTTTTGAGACAGAAGAGTCAAGTGTACGGAGATACATGGGCACGATAACAGGAATTAGTGATCTTGATGCTGCTCGTTGGCCAAACTCACATTGGCGTTCTGTAAAGGTTGGCTGGGATGAATCAACTGCCGGAGAGAGGCAGCCAAGGGTGTCGCTTTGGGAGATTGAGCCCTTGACAACTTTCCCAATGTACCCATCTCCTTTTCCACTCAGACTGAAGCGTCCATGGCCAACAGGCTTGCCTTCATTACATGGTGGTAAGGATGACGACTTGACTTCTTCTCTCATGTGGCTCCGAGACAGCGCAAATCCTGGTTTCCAATCATTGAATTTCGGGGGTCTCGGTATGAATCCTTGGATGCAGCCAAGGTTTGATGCTTCCTTACTTGGTCTGCAACCTGACATGTATCAAACGATAGCTGCGACTGCTTTCCAGGACCCAACAAAGCAGGTCTCTCCCACGATATTGCAGTTCCAGCAGCCGCAGAACATAGGTGGCAGAGCTAATACACTTCTGCCAAGTCAGATTTTGCAGCAAGTGCAGCCTCAGTTTCAGCAGCAGCAATACCTCCAAAACATCAACGAGACCACAATCCAAGGGCATGCTCAGTCTGAGTTCCTTCAGCAGCAGCTCCAACGCTGCCAGTCGTTTACTGAGCAGAAGCCACAGCTGCAAACCCAGCAACAACAGCAAGAATCACAGCAACAACAGCAGCAGCAATCGCAGTGTATGCAAGTCCCACAACATCAGCAAATGCAACAGCAGAAGAACATGACCAACTATCAGTCTGTACCTAATGCATTGTCACCGTTTTCTCAACTCTCCTCTCCTTCTCAGTCTTCACCTATGACACTGCAAACAGTATTACCATTCTCCCAGCCACAGAGCTATCCAGACACGAGTATGAGCTCATTGTCACCATCCAACACATCCACCATGCATAATGCATTGAGGCCATTTTCATCGGAAGCACCTTCGCACCTAAGCATGCCAAGACCGACTGCAGTACCTGTCCCTGACCCATGGTCATCGAAGCGAGTTGCAGTGGAGTCTTTGCTTCCCTCTCGTCCTCAGGTTACATCGCAGATGGAGCAGTTGGACTCAACAGCACCTAGTATACCACAAAGCTCTGCGTTGGCGCCGCTTCCTGGAAGAGGATGCTTGGTGGATCAAGATGGGAACTCTGATCCTCAAAACCATCTGTTATTTGGCGTTAACATAGATTCACAGTCACTTCTAATGCAAGGTGGCATCCCAAGCCTCCAGGGTGAGAATGATTCGACGGCAATTCCTTATTCCACCTCCAATTTCCTGAGCCCGTCGCAGAATGATTTCCCCTTGGATCAAACACTAAGTAGTGCAGACTGCTTAGATGAATCAGGATATGTGCCGTGTTCACAGAATTCTGATCAAGTGATTAATCGACCACCTGCGACCTTTGTGAAGGTTTACAAATCGGGAACCTATGGAAGGTCACTTGATATCACTAGATTTAGTAGCTATCATGAACTTCGTAGAGAACTAGGGCGCCTATTTGGCCTTGAGGGCCAGTTGGAAAACCCTTTGAGATCAGGCTGGCAGCTTGTATTCGTCGACCGAGAGGATGATGTCCTCCTCGTTGGCGACGACCCTTGGCAGGAATTCGTGAATAGCGTCTCCTGCATAAAGATACTTTCACCACAGGAGGTGCAGCAGATGGGCAAGCCCTTTGAGCTTTTGAGCTCGGCTCCCGGAAAGAGGCTAGGTAGCAGCTGTGATGACTATGTGAGCAGGCAGGAATCAAGAAGCCTGAGCACAGGAATTGCATCTGTCGGCTCAGTTGAATTCTGA
>LOC_Os06g47150.1
ATGATAACTTTCGTGGATTCCGCGGCGAAGGAGCGGGAGCGGGAGAGTGACAAGTGCTTGGACCCGCAGCTGTGGCACGCCTGCGCCGGCGGCATGGTCCAGATGCCGCCGGTGAGCTCCAAGGTGTACTACTTCCCGCAAGGCCACGCCGAGCACGCGCAGGGGCATGGCCCCGTCGAGTTCCCGGGCGGGCGCGTCCCGGCGCTCGTGCTCTGCCGCGTCGCGGGCGTCAGGTTCATGGCCGATCCGGACACCGACGAGGTGTTCGCCAAGATCCGCCTCGTCCCCGTCCGCGCCAACGAGCAGGGCTACGCCGGTGACGCCGACGACGGCATTGGCGCCGCCGCGGCCGCGGCGGCGCAGGAGGAGAAGCCCGCGTCGTTCGCCAAGACGCTCACGCAGTCCGACGCCAACAACGGCGGGGGGTTCTCCGTGCCGCGCTACTGCGCCGAGACCATCTTCCCGCGTCTCGACTACTCCGCCGATCCCCCCGTCCAGACCGTCCTCGCCAAGGACGTCCATGGCGTGGTCTGGAAGTTCCGCCACATCTACCGCGGCACGCCGAGGCGCCACCTCCTCACCACGGGGTGGAGCACCTTCGTGAACCAGAAGAAGCTCGTCGCCGGCGACTCCATCGTGTTCATGCGCACCGAGAACGGGGATCTCTGCGTCGGCATCCGCCGCGCCAAGAAAGGGGGCGTGGGAGGCCCGGAGTTCCTGCCGCCGCCGCCGCCGCCGCCGCCGACACCTGCCGCCGGCGGCAATTACGGCGGGTTCTCCATGTTCCTGAGGGGCGACGACGACGGCAACAAGATGGCGGCGGCGGCCAGGGGCAAGGTCAGAGCCCGTGTCCGGCCAGAGGAGGTCGTCGAGGCGGCCAATCTCGCCGTGAGCGGGCAACCATTCGAGGTCGTCTACTACCCGAGGGCGAGCACGCCGGAGTTCTGCGTGAAGGCCGGGGCGGTCAGAGCGGCGATGCGGACGCAGTGGTTCGCCGGCATGAGGTTCAAGATGGCATTCGAGACGGAGGACTCATCAAGGATCAGCTGGTTCATGGGCACTGTATCGGCCGTGCAGGTTGCTGACCCCATTAGATGGCCTAATTCACCATGGAGGCTTCTTCAGGTTTCATGGGATGAACCGGACTTGTTACAGAATGTGAAGAGGGTGAGCCCATGGTTGGTTGAGCTTGTGTCAAACATGCCGGCCATCCACCTTGCTCCATTCTCGCCTCCACGGAAGAAGCTTTGCGTGCCGTTGTACCCCGAGCTTCCCATCGACGGCCAATTTCCGACACCGATGTTCCATGGAAACCCGCTCGCCCGTGGGGTTGGTCCTATGTGCTATTTCCCGGATGGCACTCCTGCAGGCATACAGGGAGCCAGGCATGCTCAATTTGGTATATCTTTATCAGATCTCCACCTTAACAAACTGCAGTCGAGTCTATCGCCCCACGGCCTTCACCAGCTTGATCACGGCATGCAGCCGAGGATCGCCGCTGGTCTAATTATCGGTCATCCGGCTGCTCGGGATGATATCTCATGCTTGTTGACCATTGGTAGCCCCCAGAACAACAAGAAATCAGATGGCAAGAAGGCGCCAGCCCAGCTGATGCTTTTCGGAAAACCCATACTCACAGAGCAGCAGATATCCTTGGGTGATGCTGCTTCGGTGGATGTTAAGAAGAGCTCTTCTGATGGTAATGCTGAAAATACGGTGAATAAGAGTAACTCCGATGTTTCAAGCCCGAGAAGTAATCAGAATGGCACCACAGATAATTTGTCATGTGGAGGAGTTCCATTGTGCCAAGACAACAAGGTACTTGATGTTGGGCTGGAAACAGGGCACTGCAAGGTATTCATGCAGTCGGAGGATGTCGGGCGCACACTTGATCTCTCTGTTGTTGGTTCATATGAGGAATTATACCGGCGGCTTGCTGACATGTTCGGCATCGAGAAAGCTGAGCTGATGAGTCATGTTTTCTACCGTGATGCGGCTGGGGCACTCAAGCACACTGGAGATGAACCTTTCAGCGAGTTCACGAAGACGGCGCGTAGGCTGAATATACTAACAGATACAAGCGGCGATAACTTAGCGAGGTAG
>LOC_Os06g48950.1
ATGATGAAGCAGGCGCAGCAGCAGCCGCCGCCGCCACCGGCGAGCTCTGCGGCGACGACGACCACCGCGATGGCAGCCGCTGCGGCGGCGGCGGTGGTGGGGAGCGGGTGCGAAGGGGAGAAGACGAAGGCGCCGGCGATCAACTCGGAGCTGTGGCACGCCTGCGCGGGGCCGCTGGTGTCGCTGCCGCCGGCGGGCAGCCTCGTCGTCTACTTCCCCCAGGGCCACAGCGAGCAGGCGGACCCAGAAACAGATGAAGTGTATGCACAAATGACTCTTCAGCCAGTTACTTCATATGGGAAGGAGGCCCTGCAGTTATCAGAGCTTGCACTCAAACAAGCGAGACCACAGACAGAATTCTTTTGCAAGACACTGACTGCAAGTGATACAAGTACTCATGGAGGCTTCTCTGTGCCTCGTCGAGCTGCAGAAAAGATATTTCCTCCACTGGACTTCTCAATGCAACCACCTGCACAAGAACTACAGGCCAGGGATTTGCATGATAATGTGTGGACATTCCGTCACATATATCGGGGTCAGCCAAAAAGGCATCTGCTTACCACTGGCTGGAGTCTATTTGTAAGCGGCAAGAGGTTATTTGCTGGAGATTCTGTCATTTTTGTCAGGGATGAAAAGCAGCAACTTCTATTAGGAATCAGGCGTGCTAACCGACAGCCAACTAACATATCATCATCTGTCCTTTCAAGTGACAGCATGCACATAGGGATTCTTGCTGCTGCAGCCCATGCTGCTGCCAACAATAGCCCATTTACCATCTTTTATAACCCTAGGGCCAGTCCTACTGAATTTGTTATCCCATTTGCTAAGTATCAGAAGGCAGTCTATGGTAATCAAATATCTTTAGGGATGCGCTTTCGCATGATGTTTGAGACTGAGGAATTAGGAACACGAAGATACATGGGAACAATAACTGGCATAAGTGATCTAGATCCAGTAAGATGGAAAAACTCGCAGTGGCGCAACTTACAGGTTGGTTGGGATGAATCCGCAGCCGGTGAAAGGCGAAATAGGGTTTCTATCTGGGAGATTGAACCGGTCGCTGCTCCATTTTTCATATGTCCTCCACCATTTTTTGGTGCGAAGCGGCCCAGGCAATTAGATGACGAGTCCTCGGAAATGGAGAATCTCTTAAAGAGGGCTATGCCTTGGCTTGGTGAGGAAATATGCATAAAGGATCCTCAGACTCAGAACACCATAATGCCTGGGCTGAGCTTGGTTCAGTGGATGAACATGAACATGCAACAGAGCTCCTCATTTGCGAATACAGCCATGCAGTCTGAGTACCTTCGATCATTGAGCAACCCCAACATGCAAAATCTTGGTGCCGCCGATCTCTCTAGGCAATTATGCCTGCAGAACCAGCTTCTTCAACAGAACAATATACAGTTTAATACTCCCAAACTTTCTCAGCAAATGCAGCCAGTCAATGAGTTAGCAAAGGCAGGCATTCCGTTGAATCAGCTTGGTGTGAGCACCAAACCTCAGGAACAGATTCATGATGCTAGCAACCTTCAGAGGCAACAACCTTCCATGAACCATATGCTTCCTTTGAGCCAAGCTCAAACCAATCTTGGCCAAGCTCAGGTCCTTGTCCAAAATCAAATGCAACAGCAACATGCATCTTCAACTCAAGGTCAACAACCAGCTACCAGCCAGCCCTTGCTTCTGCCCCAGCAGCAGCAACAGCAGCAGCAGCAGCAGCAACAACAACAACAACAGCAACAACAACAAAAATTGCTACAACAGCAGCAGCAACAGCTTTTGCTCCAGCAACAGCAGCAATTGAGTAAGATGCCTGCACAGTTGTCAAGTCTGGCGAATCAGCAGTTTCAGCTAACTGATCAACAGCTTCAGCTGCAACTGTTACAAAAACTACAGCAACAACAGCAGTCATTGCTTTCACAACCTGCAGTCACCCTTGCACAATTACCTCTGATCCAAGAACAGCAGAAGTTACTTCTGGATATGCAACAGCAGCTGTCAAACTCCCAAACACTTTCCCAACAACAAATGATGCCTCAACAAAGTACCAAGGTTCCATCACAGAACACACCATTGCCACTGCCTGTGCAACAAGAGCCACAACAGAAGCTTCTACAGAAGCAAGCGATGCTAGCAGACACTTCAGAAGCTGCCGTTCCGCCGACCACATCAGTCAATGTCATTTCAACAACTGGAAGCCCTTTGATGACAACTGGTGCTACTCATTCTGTACTTACAGAAGAAATCCCTTCTTGTTCAACATCACCATCCACAGCTAATGGCAATCACCTTCTACAACCAATACTTGGTAGGAACAAACATTGTAGCATGATCAACACAGAAAAGGTTCCTCAGTCTGCTGCTCCTATGTCAGTTCCAAGCTCCCTTGAAGCTGTCACAGCAACCCCGAGAATGATGAAGGATTCACCAAAGTTGAACCATAATGTTAAACAAAGTGTAGTGGCTTCAAAATTAGCAAATGCTGGGACTGGTTCTCAAAATTATGTGAACAATCCACCTCCAACGGACTATCTGGAAACTGCTTCTTCCGCAACTTCAGTGTGGCTTTCCCAGAATGATGGACTTCTACATCAAAATTTCCCTATGTCCAACTTCAACCAGCCACAGATGTTCAAAGATGCTCCTCCTGATGCTGAAATTCATGCTGCTAATACAAGTAACAATGCATTGTTTGGAATCAATGGTGATGGTCCGCTGGGCTTCCCTATAGGACTAGGAACAGATGATTTCCTGTCGAATGGAATTGATGCTGCCAAGTACGAGAACCATATCTCAACAGAAATTGATAATAGCTACAGAATTCCGAAGGATGCCCAGCAAGAAATATCATCCTCAATGGTTTCACAGTCATTTGGTGCATCAGATATGGCATTTAATTCAATTGATTCCACGATCAACGATGGTGGCTTTTTGAACCGGAGTTCTTGGCCTCCTGCCGCTCCCTTAAAGAGGATGAGGACATTCACCAAGGTATATAAGCGAGGAGCTGTAGGCCGGTCCATTGACATGAGTCAGTTCTCTGGATATGATGAATTAAAGCATGCTCTGGCACGGATGTTCAGTATAGAGGGGCAACTTGAGGAACGGCAGAGAATTGGTTGGAAGCTCGTTTACAAGGATCATGAAGATGACATCCTACTTCTTGGCGACGACCCATGGGAGGAATTTGTCGGTTGCGTGAAATGCATTAGGATCCTTTCACCTCAAGAAGTTCAGCAGATGAGCTTGGAGGGTTGTGATCTCGGGAACAACATTCCCCCGAATCAGGCCTGCAGCAGCTCAGACGGAGGGAATGCATGGAGGGCTCGCTGCGATCAGAACTCCGAGGCCATTCTTAAGATCTCCATGATGAAATCAAAAGTTGAAGATGTCAGGTATTGGAATACTGCGTAA
>LOC_Os07g08520.1
ATGGCGCAGCCGCCTGACGCCGCCGCCGCCGCCGCCGTCCCGCCGCCGGTAGTCATCGACCGGGATGTCTGGCACGCCTGCGCCGTCCCGTACTCCGGCGTCCTCCCCGGCGTCGGCACACTGGTCTACTACATCCCCCATGGCCACATCGAACAGTGCGCCGAGGATCCCGCGCTGCTGCTCTCCCGCCTCCCGGACCCCATCCACCCCGTGCCCTGCACCGTTGCCGACCTCGTCCTCGACGTCGACGCCGAGAGCGGCGAGGCGTACGCCACCATCTCCCTCCTTCCAGGCAGCCACGACGACACGACCGCGCGGCGCCAGGTCCCCGCCCACGGCGAGCCGGGGTTCCGCTTCTTCGAGAAGCAGCTGTCGCCGGCCGACGTCACCAGCAACGCCCTCGTCCTCCCCGCCGGCGCCGAGCACGTCCTTCCGCCGCTCGACATCGCCGCCTACCAGACCGCCCGGCTCTTCGACGTGAGGGACCTGCGAGGCAAGCGCTTCGAGTTCGTGCACATCTGGGACAAGAAGCGCTGCCGCTACATGCTCGGCGACCTCGGCGTCAACGACAACGACGGCTGGAGAGGGTTCGTCAAAGCCAAGCGCCTCGCCACCAGGGACACCGTGGTCTTCATGCGCCGCGGCGGCGGCGACGGCGACGGCGACGGCGAGCTGCTTGTCGGGGTGCGGCGCGCGCCCCGCGCGCGCGGCGGCCACCACCCGAGGCCCGGGGTCGAAGACAACAAGGTGGTGTCCGAGGTGTGGCTGGCGATGCAGGGCGTGACGCCGTTCGAGGTGACCTACTACCCACGGGAGGGCACATTCGAGTTCGTGGTGTCGCGCGACGAGTACATCGGCTTCTCCTTCTCGCCGTTCTACCCTTTCGTTCCCGGGACGACGGTGCACTTGCGGATGAACCCGCTGCAGATCGCCCAATCGATTTCGGGCACCGTCAGGACCTTCGACCATCTACGCCCATGGCGCATGCTCGAGGTTGATTGGGATCAAGCGGCCTCCCCGATCTCCTACAGGATACACAGACAAGTTAATTCTTGGCAAGTCCTGCGTCAGCCTCAGCCAGCAGCAACTACTTCGGCTGTGCGAATTCGGGATGCCATTGTTGCCACCCCGCAAGTTCAGATAATGGCGCTGCCGAGGCCGCCGCCGCCGACGACGACGACGGGAATGGTGCCGTCCGATGATTCCTACGCCATGATTTCCCTCTTTCCGGGCGACTGCTACGTCACGCACCGCCCGCTTCCCGCCGCGCGCGACCCCGTCGGAGGCCAGCGGGAGTTCTGCTTCTTCGACAAGAAGCTGTCGCCGAGCGACGCCGCGGCGAACGGCGGCGGCAGCGGCGCCCTCTTCGTGATCCCCAAGCCCAGCGCCGCCGAGCACGTCCTTCCGCGGATCCCGGACCTCCGCGTGACGAACCTGCAAGGCGGCCGCTGGGAGTTCGGCCACACCTGGAGCGACGCCGACACGGACCGCCGCTCCTCCTCCCACACGCTCGCCGCCGGCTGGAGCGCGTTCGTCAAGGCCAAGCGCCTCTGCGTCGGGGACACCGTGATCTTCATGCGCCGCCGCCCCGGCGGCGAGCCGCTCGTCGGGGTGCGCCGCAAGCCGCACGGCGGCATGCCGGTCGGGATCCCCGACAAGCACGTGGCGGACGCCTGGCTCGACGCGTCGTCCGCCCAACCGTTCAGGGTGACCTACTGCCCATGGCAGGGCACGGCGGAGTTCGTGGTGCGCCGCGAGGAGGTGGAAGGCTCGCCGCCGCTCGCTCCGGGGACGAGGGTGCGCTTACTGATGAACCCCGACGACGCGCGCCGCCGCAGCCAGCCACCGGTGTACGGCACCGTCAGGGACGTCCATTGCCGGAGCGAGTGGCGCATGCTCGAGGTTGACTGGGATCGTGACTCCCCGCTCGCTCCCACGATGAACAGACGAGTTAATTCTTGGCAAGTCCAACCCGTTCAGCTCGCTCTTCCACCACAGGGTTCTGATGAGGAGGCGGCAGCAGCAACCACATCGACTGCGCACGCCGGAGATGCCACCACGTCTGCTCCATCGTTGGCGCTGCAACTTCAGACAATGGCATCCTCTTCTTCTTCATCCGCACCAATTATCCCGAGTCGTGGCTCCGCGTTTCGCATTGTAAATCCTCGAGATGGATCACAGGGCTAA
>LOC_Os07g08540.1
ATGGCGGCGGCGGCGGCGGCGCTCGCCGACGACGGCGACGGGATCGTAGACCGTGCCATGTGGCTCGCATGCGCCGCCCCGAACTCCGGCCGCCTCCCCGCCGTCGGCTCGATGGTCTTCTACTTCGTCGACGGCCACGCAGAGCAGTTTTGCCAGTTCCCCGCACCTCTCCTGGAGCAGCTCGCCGTCCCCGGCCCCCGCGTCTTCCTCTGTACGGTGGCCGCCGTCCGCCTCCGCGCCGACGCCCTCACCAATGAGGCCTACGCCGACATCACCCTCGACCCGGTCGCCGACCACGACGTCCCGCGCCTGCTCCCCGCTCCCGCTCCCGCCGCCGCCGCCGGTGGCCAGCAGCAGCAGTTGCGTTACTTCGTCAAGACGCTGATGTCTTCCGATGCCGAGTACCGAGACCGCTTCGCCGTCCCCATGGATGTTGCCAAGGACGTCTTCCCGCCGCTGGTCGACGCCAAAGCGGTCCAGCCCCTCATCGTCAAGGACCTTCAAGGATCTCCGATGACGTTCGACTACGGCAGGAACGGCAACAGGGTCACGCTCGCCAAGGTCTGGAAGAAATTTCGGGACGACATGGACTTCGTCGACGGAGACAGCGTCATCTTCATGCGTCGCCGCGACGACGACGAGCTGTACGTCGGGGTGCGGCGCCAGCGCACGCTCGACAAGCCACTCAGGACGCGCCGATCCAGGCCTCCGACACCGCTTCCGGTGGCCGTGCAGGAGGTGATAGCTGCAGCGGGTCGCGCGGCGGCCGGCGAGCAGTTCACTGCGACGTACCGCTCGCGGCAGGACGGCGACGAGTTCGTCGTGCCACGCGAGGTGGTGGAGGAGGGGCTCCGCCTCCGCTCCAGATTCACTCCCGAGATGGAGGTGGAGTTTGTTTGGGCCCTTGAGGATGGCGCGCCGCCCAGCGTCGGGCCACATGGCAAGATCACCGCCATCCACGACACTACATGGATGTGGCGATCAGTCGAGATTGGATGGACGGGAGGTTCAGAGATGAACAAGTACGCCAACTTCTGGCAAGTTCGATTGGTTGGTTCGGACGATTTTGCTTCTGCTGCTCCTCCCCCTCCTCTTTCTCCAAAGAGGCTGAAGAGTTCAGAGCAGTGCCCGTCGCGTCCACCAGAGCCCCTTCCAGGCAGGGTGTTTCTATGTAAAGTCACAGCTGTCCGCTTGGATGCAACAAGAAATGAGCTCTTTGCGACCATGTCCCTCATCCCAGTCGCCAGAGACCAAGCCATCCAGCCTCAGGCGCCCGCTGATCCAGGTCCAAGCTCCCCTCAAGTGCAGACTACTCTTGTTTCATTTGTGAAGCCTCTCACGTGCACCGATGCTGTCAAGAATCGGTATCGGTTCATAGTGCCCAAGAGAGAGACCGCCATGGGTGTTCTACCCCAGCTCCAATTGAACGAACACGTGCCGCTCTATATCAAGGACATGCACGGAAAGGAGTGGGTGATTAATTATACATGGAAAGAGTACACCCACATGCTTTCCAGTGGCTGGATAAAATTCGCGAATGCCAACCGCCTTGTCACAGGTGACAACGTAGTGTTTATGCGCAGCATGGACAGTGGCGAGAGATACATGGGGCTGCGTCGCACCCTCAAGCCGGAGCCAGTGTCAGTTGACGAAGTGATTGAGGCCGTATGGAGGGCGGCGCGTCTCGAGCCGTTCGAGGTGACCTACCTCTCGCGCCAGGACGGCGACGAGTTTGTTGTACCGTGTGGGATTGTACATAATGCTCTACGAGCGAAGTTTACCCCAGGAATGGTGGTAAACTTCGTATGGGCTGTTGAGGAGGACAGGCTGCCGAATGTTGGGCCACAGGGAAAGGTCATTGCCATAGAGAACTATGCAACCTCAATCTGGAGGATGATTCAGGTTGAGTGGCCATCCTGTGCAGGAATGAACAGATATGTTAATTTTTGGCAAATTCGTGAAGTTCTTGGAGAGAGTTCCTTTGAGGCATCCACTTGCATTGTGAGAAGTCAAGATTACTCGCCGGCACCACAGAGGAATTTAGTTAATGCGCTTCAGCTTCCTGACGGAACAAAACAGCTTCAGCAAAACAAGAAGTCTGTTTCCTCGTCATCCACCTTCCGACTCTTTGGCAAAAAAATGACACCTGGCGTGCCACCAAGAAGAGACACCAGTGGTCTTTCTGGACAGGTATCATTATTCAGCCATTATCTTCCCCATGATGAGGACGATGGACAAGTTCCAACGATGAGGCAACGGCTAGAGACGCTGTTTCCTGATAACATCTGA
>LOC_Os07g08600.1
ATGCCGTTGCCAAGTTGCCGTCGACGAGAGCAGAGGCCAAGGCAAAGCTGCTTCCAGAATCCAGAGTGCCACCTCCGTCTCCGAGCACGGCAGCAACGGCCACAGGAATCTGCCGTGCAGAGCACGCTATCCTCATCTATATATTTCTCTGACCACTTCGTCCTCACCCCTCCCCCATTTCAAATCACGCCCACCTCAATTCAGAACTCCACATGGCTGCCGATCCCAACCTCCCCGGCCGTGGCGGCGCCACCTCTTCCCCGATGCCTCGGTGGCGTCGACGGCGAGGGCGCGCCATGCGCGCCGCCCCCCTCCCCCATCCCTGCTGGCCCCGCTTCGTCGACGGTCTCCGCGGCGTCGAGCGCGCCCGCTACCCGCGACTACCTCGGCGGGATCACTGGCCACCGCCTCGGCCAGGAGGACGACTCCGGCGGCCACGAGTACACATCCGTCTCCGGCATCCACGTCCCCAGCAGCAGCGGCGTCGCCTTCGTGTCGTTCGGCCAGTGTCCTCAGGAGGTGATCTCCACCGACCTCTGCCTCGGCTTGGGGCCCATCGCCGCCACCGCACCGCTGCAACCTCCTCCACCTCCAGCGGCGGCAGCGGCAGCGGGGTCTCCGTCTGCTACGACGCCGGAGCCAGGACATGGGGAAGCGACACCGACGACAAGTTCCTCCGCGCAGTTTCAGACGCAGGCGCAGCAGGTTACGCGCGACATGTGGATGGCCTGCGCTGCACCCAAGTCCGGCCGTCTCCCCACCGTTGGATCATTGGTCTACTACTTCCCGGACGGGCACGCCGAGCAGTGCCTGTCACGTCCGCAGGAGCCGCTTCCAGGCAGAATTTTCCTATGCAAAGTCACGGACGTCCGCCTCGGCGCAGCAGCAACAAACGAAGCCTTGGCAACCATCTCTCTCGTCCCGATCGCCGCCGACGACCATGCCTTCCAGCTTCAGGCTCCCGCTGATCCAGACCCTGCTCCAGCCCAGTCCCAGAGTCTCGTTTCATTCGTCAAGCCTCTCACCTATACCGATGTCACCAAGAATCGGTTCATGGTGCCCAAGGACGATGCCGCTGCGGGAGTTCTTCCTCACATACAGTTGAACGATGATGTGCCTCTCCGAATCAAGGACTTGAGCGGAAAGGAGTGGGCGTTTAACTACACCTGGAAAGCTCACACCCGCATGTTTCGCAATGGTTGGATGGAGTTTTCTAATGCCAACGGCCTCGTCACTGGCGACAATGCCGTGTTCATGCGTCGCGGCAACGGCGAGATGTTCATGGCGGTGCGGCGCACGCGCAACAGGCCGGCGCCCTTCTCAGTGGAGGAGGTCATCGAGGCCGTGTGGCGGGCAGCGCGCCGCGAGCCGTTTGAGGTCAGCTATTGCTTGCGCCAGGATGGGGACGAGTTCGTTGTACCACGTGACATCGTCGATGATGGCTTACGCGCCAGGTTTGCTCCAGGCATGGCTGTGAACTTCGTATGGGCTGTTGAGGATGGCAAGCTGCCAACCATCGGGCCACAGGGGGAGGTGATTTCCATAGAGAACTATGCTACGTCCATTGGCGCATAA
>LOC_Os08g40900.1
ATGGCGAGCTCCGGCGGAGGGGGTGGTGGTGGGGAGGAGGGGGAGGGCAGGGGGGCGACCAAGGTGAACCAGGAGCTGTGGTACGCGTGCGCGGGGCCGCTCGTCTCGCTGCCGCCGCAGGGGAGCCTCATCGTCTACTTCCCCCAGGGTCACAGCGAGCAGGTTGCAGCATCTATGCGAAAGGACGCAGATGCGCAAATTCCAAGCTATCCAAATCTTCCATCAAAGCTGATATGCATCCTCCACAGTGTCACCATGCTTGCTGATCCTGACACAGATGAGGTTTATGCTCGAATGACTCTCCAGCCAGTTAGCAATGTGACCCAGTGTGACAAGGAGACATTGCTAGCATCAGAGCTTGCGCTGAAGCAAACCAGGCCACAAACAGAATTCTTTTGCAAAACACTGACCGCCAGTGATACAAGCACTCATGGAGGTTTCTCTGTGCCACGCCGTGCCGCTGAGAGGATTTTTCCTCGTCTTGACTTCTCCATGCAGCCTCCTGCCCAGGAACTGCAGGCCCGGGATTTGCATGATAATGTTTGGACATTTCGTCATATATACCGGGGTCAGCCTAAAAGGCATTTACTGACTACGGGCTGGAGCCTATTTGTCAGTGGAAAGAGATTACTTGCTGGTGATTCAGTCTTGTTTATTAGGGATGCAAAACAGCAGCTCCTCTTGGGGATCAGACGAGCAAATAGGCAACCTACGAACCTCTCATCATCTGTCTTATCTAGTGATAGTATGCATATTGGAATTCTTGCTGCAGCAGCCCATGCTGCAGCGAATAACAGCCAATTTACAATATATTATAACCCAAGGGCCAGTACTTCCGAATTTGTGATTCCTTTTGCCAAATACCAGAAGGCAGTGTATGGTAACCAATTATCTCTTGGCATGCGGTTCAGAATGATGTTTGAAACTGAAGAGTCAGGAACAAGAAGGTACATGGGTACAATAACTGGTATAAGTGATCTGGATCCAGTAAGGTGGAAAACATCTCATTGGCGCAATATTCAGGTTGCATGGGATGAAGCGGCACCAACTGAGAGACGCACCAGGGTTTCCCTCTGGGAGATAGAGCCTATCATTGCTCCATTCTTCATCTACCCCTCACCATTATTCACCGCAAAACGTCCAAGGCTACCTGGGATGACAGATGACGAGACTGAAATGGACGGTCTTCTCAAGAGGGCCATGCCATGGGTTGGTGAGGAGATTTGCAAGAAAGATCTGAATATTCAGAACAGTGTAGTGCCTGGTCTAAATCTAGCTCAGTGGATGAACATGCAGCACAGCTCCTCGCTTCCTGGCACGGTTGTGCAACCAGAGTTACTAAACTCATTAAGTGGAAAACCTGTACAAAATTTGGCTGCAGCTGATTTATCAAGGCAAATCAGTTTTCACCCGCAGTTCTTGCAACAAAACAACATCCAGTTCAACACTGCGTTGGTACCTCAACAAAACCAACAGACAGAACAATTAGCGAAAGTTATCCCTACACCAAACCAATTGGGAAGTGTTATAATACCGCAGAAGGTGGTTCAGGATTGCAACTCTGAACAAAGGCAGCATGTGGTTACTCAACCAGTGCAAGGCAGCCAGCCAAACATAAACATTCCACAGCCTCAGCTTGTTGTTCAGGCTCAGCTTCAGCAACCGCAAGTCATTCTCCAGGCGCAACTGCAGCAACCTCAAGTTGTTGTCCAGGCCCAACTCCAGCAAACGCAACCTTCGGTCCAAAGTCACACTGTCTTACAAGGAGGTCTTCAACAAATCCAGCTTCTCCAGCAGCAACAGCCACATGTGCAGCACCAGCAGATACCGCAACAGTTACATCATCAGCAGCAGCAAACACAACAGTTGCAACCTGTCCAGCAGGTTCAGCAGTCAGTACAGGAACATCAGCAAATAAAGATACAACCTGTTCATGTTTCCATGGATGCAAGTATGAATACGCAGGTGGCAGATCATCAAATGAAACTACAACTACTCAAGGCTTTACAGCCACAGCAGCCTCTGATCTCAGAGCAGCAGAAGATGCTTTTGGATTTGCAGCAGCAAGTGATAAATTCACAGTCAGCTCCTCAGCAGTGTGTACAGGTAACAAACCAAGCTATTAGTTTACATAACAGTAACACTATTCAATACCCGACACAGCAAAAGGTTCAGTCTCACCAAGTTCAAGACTTAACTGGGAATGTCATTCCTAATTCAAAATCAGACATCGCTACTTCCATGGGTGCTAGTTCTTTGCATGTAGCTGGTGGACGCCAATTATTGAAGACAGATGATGTTCCGTCTACTTCAACATCACCATCCACTAACAGCAATCCTGTTCTTCTGCAATCCATCCCAAGTAGCTCCAAGAACCAAAGTTTAACTACAGCAGGAAAGACATCTCAATCATCTGTTGTGTTGGGTCCTACGATCGAACAGGACACAAAGCCATATCAAAATGTAAAGCAAACAGTTATGATTCCCAAGACGACAGAACAAAGGCCAGCTACTGGACAAGACTGCATAAATAACAATCCTCAAATGGATTACTTGGACACATCCTCTTCAGCTACTTCGGTTTGCCTTTCCCAGGCTGATGGATCATTGCAACAAAACTTTCCACCTTCATCCTTCCACCAGCATCACTTGCTAAAAGACACAGTTCCAGATAGCGAGTTTGAGGTTACAGATCCAAGAAATAACCTTCTATTTGGGGTGAATATTGATGGTCAACTGGGTTTACCACTTAATGCAGACCTGCTTGCGAATGACATTGGAACCGATAAATACATGGATCAGTTGCCAGGAAATGGCATTTCTAACTTCATTTCATCAAAGGATTCTCAACAAGAGTTATCATCTTCAATGATTTCACATTCATTTGGAGTTGCTGATATGGCATTCAATTCTATAGATTCTGCAATCAATGATACCCCATTCTTAAATAGAAATTCCCGGTCTGCAGCAGGTCCTGCACATCAACGGATGAGAACCTACACCAAGGTACACAAGCGTGGTGCGGTGGGAAGATCAATTGACATCAATCGATATTCTGGATATGATGAGCTGAAACATGACGTTGCTCGGATGTTTGGTATTGAGGGGCAGCTTGGTGATCAAAATAGAGTTGGCTGGAAGCTAGTATATGAAGATCACGAGAAGGATGTTCTACTAGTTGGTGATGATCCATGGGAGGACTTTGTGAAATGTGTACGATGTATCAGGATTCTTTCTCCACAGGAAGAAATGCAGATGAGATTAGTCGGCGACTTTGGAGACAGCTTTCTACCCAACCAAGCTTGCAGCAGCTCTGATGGGGGTCATCCCTGGAGGATAACCGGCGACTAG
>LOC_Os10g33940.1
ATGAAGGAGGTGGGGGAGGTGGAGGAGGTGAGGTGCTTGGACCCGCAGCTATGGCACGCGTGCGCGGGCGGGATGGTGCAGATGCCGGCGCCGCGTTCCCGGGTGTACTACTTCGCGCAGGGCCACGCCGAGCACGCCGACGGCGGAGGCGGGGCGGCGGCGGCGGCCGCGGAGCTGGGGCCGCGCGCGCTCCCGCCGCTCGTGCTCTGCCGCGTCGAAGGGGTCCAGTTCCTGGCCGATCGGGACTCCGACGAGGTGTACGCCAAGATCCGCCTCGCGCCGGTCGCCCCCGGGGAGGCCGAGTTCCGGGAGCCCGACGAGCTCTGCCCGCTCGGCGCCGCCGGCGACGCGGCGGAGCCGTCGCCGGAGAAGCCGACCTCGTTCGCCAAGACGCTCACGCAGTCCGACGCCAACAACGGCGGCGGCTTCTCGGTGCCCCGCTACTGCGCCGAGACCATCTTCCCCAAGCTGGACTACAGGGCCGACCCGCCGGTGCAGACGGTGCTCGCCAAGGACGTCCACGGCGTGGTCTGGAAGTTCCGCCACATCTACCGCGGCACGCCGCGCCGGCATTTGCTCACCACCGGGTGGAGCACGTTCGTGAACCAGAAGAAGCTCGTCGCGGGGGACTCGATCGTGTTCCTGCGCACCAGGCACGGGGAGCTCTGCGTCGGGATACGGCGGGCGAAGCGGATGGCGTGCGGGGGGATGGAGTGCATGTCGGGGTGGAACGCGCCGGGCTATGGCGGCGGCGGCTTCTCGGCGTTCTTAAAGGAGGAGGAGAGTAAGCTGATGAAGGGCCATGGTGGTGGTGGGTACATGAAGGGCAAGGGGAAGGTGAGGATGGCCGATGTCGTGGAGGCCGCTAGCCTCGCGTCGAGCGGGCAGCCGTTCGAGGTGGCGTACTACCCGAGGGCTAGCACCCCGGATTTTGTCGTGAAGGCTGCGTCGGTGCAGGCCGCAATGAGGATCCAGTGGTGCTCCGGGATGAGGTTCAAGATGGCTTTTGAGACAGAGGATTCATCAAGGATTAGCTGGTTTATGGGGACAATATCTTCTGTTCAGGTTGCTGATCCCAACAGATGGCCGAATTCGCCGTGGAGACTTCTTCAGGTGACATGGGATGAACCGGACCTGTTGCAGAATGTGAAATGTGTCAGCCCATGGCTTGTGGAGCTTGTGTCAAGTATTCCACCAATCCATTTAGGACCATTTTCGTCACCTCGAAAGAAGTTGCGGGTTCCCCCACATCCTGACTTCCCATTTGAGGGTCATCTTCTGAACCCAATTTTCCATGGGAACCCACTTGGTCCTAGCAACAGCCCACTATGCTGTTACCCGGACACCGCTCCTGCAGGCATACAGGGAGCCAGGCATGCTCAATTTGGTTTACCACTAACAGACCACCAGCTTAACAAGCTGCACCTTGGTCTGTTACATAGCGGCAGTTTTAACAGACTTGATGCTATTACTCCACCTTCCCGGATATCAAAGGGCTTTGTGGTCAGTAGTGCACCAGCCCATGACAATATCTCTTGTTTGTTGTCAATCAGTACACCACAGGTCGCAGAGAAATCTGATGACAGAAAGACGACACCCCATATAATGCTGTTTGGAAAGGCTATATTTACTGAGCAGCAGATAACTTCAAGCGGATCAACAGAGACACTCTCCCCTGGAGTTACTGGAAATAGCTCACCTAATGGCAATGCGCACAAGACAGGAAATGCATCTGATGGTTCTGGTTCATCAATTTGCATTGGTTTCTCATCTCAAGGTCACGAGGCTTCTGACCTTGGTTTAGAAGCTGGTCACTGCAAGGTATTTATGGAATCGGAGGACGTTGGTCGCACCATTGATTTGTCTGTCTTTGGGTCATACGAAGAACTGTATGGTCGGCTGGCTGACATGTTCGGAATCGAGAAAGAAGAAATCATAAACCATCTTCATTTCCGTGACGCAGCTGGTGTAGTCAAGCATCCGGGTGAGGTACCATTCAGTGACTTCATGAAAGCGGCACGGAGGCTTACAATAATAGCCGGCGACAGGGAGAGAATTGAGAGACCTCTCATCGAATGCTTAGTTGAGCAGGCGTGA
>LOC_Os11g32110.1
ATGGCGACGGCGGAGGTCGGCGGCGGCGGCGGTGAGGGGGATGCTGCTGCCGCGGCGGTGGCGCGAGCAGGCGGCGGCGGCGGAGGAGGAGGAGGAGGAGGGGAGGACGCGCTGTTCACGGAGCTGTGGAGCGCGTGCGCGGGGCCGCTGGTGACGGTGCCGAGGGTTGGGGAGAAGGTGTTCTACTTCCCGCAGGGGCACATCGAGCAGGTGGAGGCCTCGACCAACCAGGTAGGCGAGCAGCGGATGCAGTTGTACAATCTCCCATGGAAGATCCTGTGTGAGGTTATGAACGTTGAGCTGAAGGCCGAGCCAGACACCGACGAGGTTTATGCTCAGCTCACTCTGCTTCCTGAATCGAAGCAACAAGAAGATAACGGCTCTACTGAGGAGGAGGTGCCTTCTGCTCCAGCAGCTGGGCATGTTAGGCCACGGGTGCACTCATTCTGCAAGACATTGACCGCCTCGGACACGAGCACACATGGCGGCTTCTCGGTGCTGCGACGCCACGCGGACGAATGCCTCCCACCACTGGATATGAGCCGTCAGCCTCCAACACAAGAGCTGGTGGCCAAGGATCTGCACGGTGTGGAATGGCGCTTTCGTCACATATTCAGAGGTCAACCACGAAGACACCTTTTGCAGAGTGGCTGGAGTGTGTTTGTTAGTGCCAAACGGCTTGTTGCTGGGGATGCCTTTATCTTTCTCAGAGGTGAGAACGGGGAACTGCGTGTTGGAGTCAGGCGTGCAATGAGGCAGCAAACTAATGTTCCATCTTCAGTGATATCAAGCCACAGCATGCATCTTGGGGTTCTTGCCACAGCATGGCATGCTGTTAACACAGGGACCATGTTCACTGTCTACTACAAGCCTAGGACAAGTCCAGCCGAGTTTGTGGTCCCTTACGATCGCTATATGGAATCACTGAAACAAAATTACTCCATTGGGATGAGATTTAAGATGAGGTTTGAAGGTGAAGAGGCTCCAGAGCAAAGATTCACTGGGACTATTGTCGGAATGGGGGATTCTGATCCAGCTGGCTGGCCTGAATCAAAATGGCGCTCCCTTAAGGTGAGATGGGATGAAGCTTCTTCCATACCTCGCCCTGAAAGAGTTTCTCCCTGGCAAATAGAACCTGCTGTAAGCCCTCCTCCTGTCAACCCACTACCAGTTCCAAGAACCAAGAGGCTTCGTCCGAATGCTACCGCTTTGCCGGCTGACTCTTCTGCTATAGCAAAAGAAGCTGCTACGAAAGTTGTGGTCGAGTCTGAACCAAATGGTACGCAAAGGACCTTCCAGACACAAGAGAATGCAACCCCAAAAAGTGGTTTCGGCAATAGCAGCGAGTTAGAAAGTGCTCAGAAATCAATCATGCGTCCATCTGGATTTGATCGTGAGAAAAATAACACTCCCATACAGTGGAAGCTAGGTTCAGATGGTCGGATGCAGATGAGCAAGCCTGAGAGTTACAGTGAGATGCTATCTGGATTTCAGCCACCTAAAGATGTACAAATCCCACAGGGTTTCTGTTCTTTACCTGAGCAGATTACTGCAGGCCATTCTAACTTCTGGCACACAGTAAATGCTCAGTATCAAGATCAACAGAGCAATCACAATATGTTCCCCAGCTCATGGTCCTTCATGCCTCCAAATACTCGCCTTGGATTAAACAAACAGAACTATTCAATGATTCAGGAAGCTGGTGTGTTGTCTCAAAGGCCTGGAAATACAAAGTTTGGGAATGGAGTTTATGCTGCACTGCCAGGCCGAGGTACTGAGCAATACTCAGGGGGTTGGTTTGGCCATATGATGCCAAATTCCCACATGGATGATACACAGCCACGCCTGATCAAGCCTAAACCTCTGGTTGTTGCCCATGGTGATGTTCAGAAAGCTAAAGGTGCTTCATGCAAACTATTTGGAATTCACCTTGACAGCCCAGCGAAATCTGAACCTTTGAAATCTCCATCAAGTGTTGTATATGATGGGACGCCACAAACACCAGGTGCTACTGAATGGCGCCGACCAGATGTAACTGAAGTAGAGAAATGTTCTGATCCTTCTAAGGCCATGAAGCCACTTGATACTCCGCAACCAGACTCTGTTCCTGAGAAGCCTTCTTCTCAGCAAGCTTCACGAAACATGTCGTGCAAATCACAAGGTGTATCAACTAGAAGCTGCAAGAAGGTCCACAAGCAAGGCATTGCACTTGGCAGGTCTGTGGACCTTACAAAGTTTAATGGCTATGAAGAGTTGATTGCTGAGCTGGATGACATGTTTGATTTCAATGGTGAACTGAAGGGTCCTAAGAAGGAGTGGATGGTTGTCTACACTGACAACGAAGGTGACATGATGCTAGTTGGGGATGATCCCTGGATTGAATTCTGCGACATGGTTCACAAGATCTTCATCTACACAAGAGAAGAGGTTCAGCGGATGAATCCGGGAACCCTGAACTCAAGATCAGAAGATAGTCATGCTAATTCAATGGAAAGGGGCTCAGTCGGCAGAGAAATGCGAGGCTGCTTGTCAACCTCGTCTCTTAATTCTGAGAACTGCTAA
>LOC_Os12g29520.1
ATGGCTGCTGCAGCGACGGCGGCGGCCTCGCCGGTTGAGGGGCTCACCGGCGGCGGCGGCGGTGGTGGTGGAGGAGTGGACGGGCTGTTCGTGGAGCTGTGGCGCGCGTGCGCGGGGCCGCTGGTGACGGTGCCCGCCGTCGGGGAGAGGGTCTTCTACCTCCCGCAGGGCCACATCGAGCAGGTGGAGGCATCGACGAACCAGGTCGCCGAGCAGCAGGGGGCTCCGCTCTACAATCTGCCATGGAAGATCCCGTGCAAGGTCATGAACGTCGAGCTCAAGGCTGAGCCTGATACGGATGAGGTGTATGCGCAGCTCACCCTGCTTCCGGAGAAGCAGCAGGATGGGAATGGGAGTGGTAACGGGAATGTGTCCAAAGACAAGGTGGAGGAGGAAGAGGTGGTGCCACCAGCTGCAACTGAGCGGCCCCGGGTGCACTCCTTCTGCAAGACGCTCACTGCGTCGGACACGAGCACGCATGGTGGCTTCTCGGTGCTGCGCCGGCACGCGGATGAGTGCCTCCCACCACTGGATATGAGTCAGCATCCCCCAACACAAGAGCTGGTGGCCAAGGATCTTCATGGGGTTGAGTGGCGCTTCCGTCACATCTTCCGAGGTCAGCCACGAAGACACCTTCTCCAGAGTGGTTGGAGTGTTTTTGTGAGTGCCAAACGCCTTGTTGCTGGAGATGCCTTCATATTTCTCAGAGGTGAGAATGGGGAACTACGAGTTGGAGTTCGGCGTGCAATGAGACAACAAGCTAATATTCCATCTTCGGTCATATCAAGCCACAGTATGCATCTTGGTGTTCTTGCAACTGCATGGCATGCAGTGAACACTGGAACCATGTTCACTGTGTACTACAAGCCAAGGACTAGTCCATCTGAATTTGTGGTACCACGTGATCTGTACAAGGAATCTCTGAAACGAAATCATTCAATAGGGATGAGATTCAAGATGACATTTGAAGGCGAAGAGGCTGCAGAGCAAAGATTCACTGGCACAATTGTTGGAGTAGGTGATTCTGACCCATCTGGTTGGGCTGACTCAAAATGGCGTTCCCTTAAGGTGCGATGGGATGAAGCTGCTTCTGTTCCTCGTCCTGATAGGGTTTCTCCTTGGCAAATAGAACCTGCTAACAGCCCTTCCCCTGTCAACCCTCTTCCAGCACCCCGAACCAAGCGGGCTCGTCCAAATGTTTTAGCTTCCTCACCTGACTTGTCTGCTGTAAACAAAGAAGTTGCTTCAAAAGTCATGGCAAACTCGCAGCAAAATGGTCTTCCAAGGGCCTTCCACAGTCAAGAAAACATGAATTTGAGAAGTCGTTTTGGTGATAGCAATGAGCTAAATACTTCCCAAAAGCTTACCATGTGGTCTTCAGGAAGCAATCAAGAGAAAAATAATGTTTCTGTCCAGAGGGAGCTAGGTTCACAGAGTTGGATGCAGATGAGAAGGCCTGATGGTTCCTCTGAGATATTATCTGGATTTCAACCACTGAAAGATACGCGGAACCCTCTGAGTTCATTTCCTAGTCAGATATCTGGAAACCGTTCAAATACGTGGAACACAATCAATGTTCATTATCCCGACCAAAATGCCAATCATAATATGTACCCTGGCACATGGTCTCTTATGCCTCCAAACACTGGTTTTGGTGTGAATCAGCAGAACTACCTAATGACGCCTGACATCACACTCCCTCAAAGGTCTCTTAATGCCAAGTTTGGTGGGAATGGAGCATTCACTTCGCTTCGGGCCCATGGCATAGATCAGCGCTCCTCTGGTTGGCTTGGGCATATTGAGCCAAGTTCTCACATTGATGATGCCTCATCGAGTCTTATCAAGCCACAGCCTTTGGTTATTGATCACAATGTTCAGAAAGCTAAAGGCTCTTCATGCATGCTATTTGGGATTTCTCTTGACAGCCCTGCAAAACCTGAACTATTGATATCCCCACCAAGTGTTGCATTTGATGGGAAGCTCCAACAGGATGCACTTGAAGAGGATGAATGCTCTGATCCTTCCAAGACTGTGAAGCCACTTGATGGAGCTCAGCACGATTCTGCTAGAGAGAAACATCAGTCATGTCCAGATGGTACCAAAAACATTCAGAGTAAACAGCAAAATGGTTCCTCCCGAAGTTGCAAGAAGGTCCACAAGCAAGGAATCGCACTCGGGAGGTCAATAGATCTTACAAAGTTCACTTGCTATGATGAGTTGATTGCTGAACTGGACCAGATGTTTGACTTCAATGGTGAGCTGAACAGTTCAAGCAAGAACTGGATGGTCGTTTACACTGATAATGAGGGTGACATGATGTTGGTTGGTGATGATCCTTGGAATGAATTCTGCAACATGGTTCATAAAATCTTCATCTACACGAGGGAGGAGGTCCAGAAGATGAATCCGGGTGCCCTAAACTCAAGGTCAGAGGATAGCCGGTCTACTTCCGTGGAACGAGGGCTAGTTGGCGAAGGGCTCCAAGGTGGTCTATCCACCCCATCACTGAATTCTGAGAACTGCTAA
>LOC_Os12g41950.1
ATGAAGCTCTCTCCGCCGGCGTCGGCGGATATGCCGCAGGCCTTGCCGGAGAACGACGGGGAACAAAGATGTCTGAACTCGGAGCTGTGGCATGCATGCGCTGGGCCCCTTGTGTCTTTGCCAGTGGTCAGGAGCAGGGTCGTCTACTTTCCACAGGGCCATAGCGAGCAGGTTGCGGCATCAACTAATAAGGAAGTTGATGCTCAAATCCCAAATTATCCAAACTTACCTCCTCAGTTAATCTGCCAGCTTCATAATGTCACCATGCATGCTGATGCAGAGACAGATGAAGTTTATGCTCAGATGACATTGCAACCATTGAGCCCGGAAGAGCAAAAGGAGCCTTTCCTTCCAATGGAGTTGGGTGCTGCTAGCAAGCAACCCACTAATTACTTCTGCAAGACATTGACTGCAAGTGACACGAGCACTCATGGTGGTTTCTCTGTTCCCCGCCGGGCAGCTGAGAAAGTCTTCCCTCCACTAGATTTTTCACAGCAGCCTCCGGCACAGGAGCTGATTGCAAGAGATTTGCATGATAATGAATGGAAATTTCGCCATATATTTCGTGGTCAGCCTAAAAGGCATCTCCTGACAACAGGCTGGAGTGTGTTTGTGAGTGCGAAAAGACTAGTAGCAGGAGACTCTGTTATATTTATCTGGAATGATAACAATCAACTTCTTTTGGGAATACGTCGTGCAAATCGCCAACAGACTGTTATGCCCTCTTCCGTGTTGTCAAGCGATAGCATGCATATAGGTCTTCTTGCAGCAGCAGCTCATGCTGCAGCCACAAATAGTCGCTTCACTATTTTCTATAACCCCAGGGCTAGCCCTTCTGAATTTGTGATTCCATTGGCCAAGTATGTGAAAGCTGTTTACCACACACGTGTATCTGTTGGAATGCGTTTTAGAATGCTTTTCGAGACAGAGGAGTCAAGTGTCAGGCGATACATGGGTACAATCACCAGCATAAGTGATCTAGATTCAGTGCGCTGGCCAAACTCACACTGGCGTTCTGTTAAGGTTGGTTGGGATGAGTCCACCACTGGTGATAAACAGCCAAGGGTTTCTCTTTGGGAGATTGAGCCTTTGACAACCTTTCCGATGTACCCCAGTGCTTTTCCTTTAAGACTTAAGCGTCCGTGGGCTTCAGGACTGCCTATGCATGGCATGTTCAATGGTGGGGGAAATGACGATTTTGCACGCTATTCTTCTCTCATGTGGCTTCGAGACGGAAATAGAGGAACCCAGTCCCTGAATTTTCAAGGACATGGAGTCTCACCATGGCTTCAGCCAAGAATAGATTCTCCATTGCTGGGCCTTAAGCCAGACACGTACCAGCAAATGGCTGCAGCAGCACTGGAAGAAATTCGATATGGGGACCCTTCAAAGCAGCATCCAGCTACTCTGCAATACCAACAGACTCATAATCTGAACAGTGGATTAAATTCTCTGTTTGCAAGCCATGTTCTAGGGCAGGTGCAGTTTCAACCTCAGCAGTCACCCCTGCAAGTTGTTCAGCAAGGCCATTGTCAGAACACTGGTGACTCTGGGTTCCTTCAAGGTCAGCTTCCACGGCTGCAGTTGCATAACACTCAGCAGCTGCTAAAGGAGCAAGAGTTGCAGCAGCAGCAAAGACAGCATGTTTTACAAGAGCAATCTAGTCAAGAGATGCAACAGCAGCTCCCATCTAGTGATCATCATGTTGCTGATGTAGCTTCTGAGTCTGGATCTGCTCCTCAGGCACAATCATCATTGCTTAGTGGATCATCATTCTACAATCAGAACCTCTTAGAAGGAAATAGTGATCCCCCTTTACATCTACACAACAATTTCCACAACTTCTCTAACCAGGAAGCCTCAAACCTTCTTATTTTGCCTCGAAGTAGCCAATTAATGGCATCAGATGGGTGGCCTTCAAAGCGATTAACTTTAGAATCTGCTGTTCATCCTGAAGCTCCGTCCATGCACCCCAAGATTGAGAAAGTAAATCACCAGGGTATATCTCATTTTCCTGGCGCCTTTCCACCACAATCAGCAAGAGGCTGTTCCATCGTCCAGGATTGCAGGGCAGATGCTGAGAACCGCCTACTTTCATCATCATTTGAACTCCAGGATGGCATGACAAGCATCATAACTGATGCTAACAGAGAAACTGATACTATGGCCATACCTTTGTTGAGATATAGTGGTGCAGATTTGACAACTGAAAACACCTTAGCAACCTCCAATTGTTTAGGTGAATCTGGAACGTTCAATCCTCTTAATAACATATCTGTAAATCCATCACAAGGAGCAACCTTTGTGAAGGTTTACAAATCAGGGTCCCTTGGGAGATCACTTGACATCTCCAGATTCAGCAGCTACTGCGAGTTACGTAGTGAGCTTGAGCGTCTCTTTGGTCTTGAAGGCCAACTGGAGGACCCTGTAAGATCAGGCTGGCAGCTTGTATTTGTCGACCGGGAAAATGACATTCTTCTCGTCGGCGACGATCCATGGCAGGAGTTTGCAAATAGCGTATGGTGCATCAAAATACTCTCGCCACAGGAGGTGCAGCAGTTGGTTCGTGGTGGAGACGGCCTTCTGTCCTCACCTGGAGCAAGGATGCAGCAGAGCAATGCCTGCGACGACTATTCTGCAAGCCACAACATGCAGAATATCGCCGGAAACATTGCATCTGTAGCGCCTCTGGACTACTGA
>Zm00001d000358_T001
ATGATTACTTTCGTGGACTCGGCGGCCATGGAGCTGGAGAGGGAGAGCGGCAGGTGCCTGGTGGACCCGCAGCTGTGGCACGCCTGCGCCGGCGGCATGGTCCAGATGCCGCCGGTGCACTCCAGGGTGTACTACTTCCCGCAGGGCCACGCCGAGCACGCGCAGGGCCACGCCCACGCCGACCTCCCCGCCGGCCGGGTCCCGGCCCTCGTCCTCTGCCGCGTCGACGCCGTCCGGTTCCTGGCCGATCCGGACACCGACGAGGTGCTCGCCAGGGTCCGCCTCGCCCCCGTCCGGCCCAACGAGCCGGACCACGCCGACGCCGCGGCGCCGGGCGCGCGGGAGGACAAGCCCGCGTCCTTCGCCAAGACGCTCACGCAGTCCGACGCCAACAACGGCGGGGGCTTCTCCGTGCCGCGGTACTGCGCCGAGACCATCTTCCCGCGGCTGGACTACTCCGCCGACCCGCCCGTCCAGACCGTGCTCGCCAAGGACGTGCACGGCGTCGTCTGGAAGTTCCGCCACATCTACCGCGGCACGCCCCGGCGCCACCTGCTCACCACCGGGTGGAGCGCCTTCGTGAACCAGAAGAGGCTCGTCGCGGGGGACTCCATCGTGTTCATGAGGACGGGGAACGGGGACCTCTGCGTCGGCATCCGGCGCGCCAAAAAGGGCGGCATCGGAGGAGGGCCGGAGTTCCCGCACCACCAGCCGCCAGACGGCGGCGGGTACGGGTACGGGTACGCCGGCTTCTCCACGTTCCTGAGAGGAGAAGAGGACGACGCGGCCGCGAGGGGCAAGGTCAGGGTGCTGGTGCGGCCGGAGGAGGTCGTCGAGGCCGCCAACCTCGCGGCGAGCGGGCAGCCGTTCGAGGTGGTCTACTACCCGAGGGCGAGCACGCCGGAGTTCTGCGTCAAGGCGGGGGCGGTCCGCGCGGCCATGCGCACCCAGTGGTGCGCCGGGATGAGGTTCAAGATGGCCTTCGAGACGGAGGACTCGTCCAGGATCAGCTGGTTCATGGGCACTGTCGCCGCCGTGCAGGTCGCTGACCCCATCCGATGGCCCAATTCACCCTGGAGGCTTCTTCAGGTCGCTTGGGATGAACCGGACTTGTTACAGAACGTGAAGAGAGTGAGCCCATGGCTGGTCGAGCTTGTCTCAAGCACGCCGGCCATCCACCACCTCACGCCGTTCTCGCCGCCAAGCAGGAAGAAGCTGTGTATCCCATTGTACCCGGAGGGCCACCAGCTCCCGGCGCCGATGTTCCACGGAAGCCCTCTGGTGGGCCGTGGTGTTGGCCCGATGCGCTACTTCCCGGACGGCGGCACTCCTCCTGCAGGCATACAGGGAGCCAGGCATGCGCAATTCGGCATATCTTTACCAGATCTCCACCACCTCACCAGGCTGCAGTCGAGTCTATCGCCGCACGCGCACGGGCTTCGCCACCAGCTCGACCACGGCGCGCGGCCGAGGATCGCCGGCGGCCTCATCGTCGGCCACCCGGCAGCTCGGGACGACATCTCGTGCTTGCTCACCATTGGCACCGCCCCGCACAAGAAACCATCAGACGTCAAGTCGGCCGCGGCGGCGCCGGCGCCGCAGCTGATGCTGTTTGGGAAACCGATTCTCACCGAGCAGCAGATATCTCTAGGCTTTCGGCCGCTGCCGGCGCCGAAGAAGAGCCCGTCCGACGACGCTGCTGAGACTGAGAGGACGGTGAGCAACAACTCGGATGCCTCGAGCCCAGCTGGGACTGCGAGTGGGAGCACGCCGTCCATCAGTGGAGGCGCCCCGTCGTCGTGCCAGGACAACAAGGCGGCGGCGACGGCGACGGCGACTGATGACGACGATCTCCTCGGGCACTGCAAGGTGTTCATGCAGTCGGAGGACGTCGGGCGCACGCTCGACCTCTCGGCTGTCGCGTCGTACGAGGAGCTCTACCAGAGGCTGGCCGACATGTTCGGCGTCGACAGGGCCGAGCTGACGAGCCATGTCTTCTACCGCGACGGCGCTTCTGGAGCGCTCAAGCACGCCGGCGACGAGCCTTTCAGTGAGTTCACCAAGACCGCTCGGAGGCTGACCATACAAACGGACGCGAGGTAG
>Zm00001d001879_T001
ATGAGCTCCTCGTCCGCGGCCAGCATCGGGCAGCCGCCGCCGCCCGCGCCGCCGCCGGAAGAAGAGAAGAAGTGCCTCAACTCGGAGCTGTGGCACGCCTGCGCCGGCCCGCTCGTCTGCCTCCCCACCGTCGGTACGCGCGTCGTCTACTTCCCGCAGGGCCACAGCGAGCAGGTGGCAGCGTCGACGAACAAGGAGGTGGACGGGCACATCCCCAACTACCCCAACCTGCCGCCGCAGCTGATCTGCCAGCTCCATGATGTCACAATGCATGCGGATGTGGAGACAGACGAAGTGTACGCGCAGATGACGCTGCAGCCGCTCAATCCACAAGAGCAGAACGACGCGTACCTGCCTGCCGAGATGGGAATCATGAGCAAGCAGCCGACGAATTACTTCTGCAAGACGCTGACTGCGAGCGACACCAGCACGCACGGCGGGTTCTCTGTGCCCCGTCGTGCGGCCGAGCGCGTCTTCCCCCCGCTGGATTTCACACAGCAGCCTCCAGCACAGGAGCTTATTGCACGGGATATTCATGATGTTGAGTGGAAGTTCAGGCATATCTTCCGAGGCCAGCCCAAAAGACACCTGCTGACGACTGGCTGGAGTGTGTTTGTCAGTGCTAAGAGACTTGTTGCTGGAGATTCTGTGCTATTCATATGGAATGAGAAAAACCAGCTTTTGCTTGGAATCAGACACGCTACCCGGCCACAGACTGTGATGCCCTCTTCTGTTCTTTCGAGTGACAGCATGCACATCGGACTCCTTGCAGCAGCAGCTCATGCTGCTGCAACAAACAGCCGCTTCACAATTTTCTATAATCCTAGGGCAAGTCCAACAGAATTTGTTATACCCCTTTCGAAATACATCAAGGCTGTTTTTCACACGCGGATATCAGTTGGGATGCGATTCAGGATGTTATTTGAGACTGAGGAATCAAGTGTCCGCAGGTACATGGGGACAATAACAGAAGTGAGTGATGCTGACCCAGTGCGTTGGCCTAGTTCCTATTGGAGATCAGTGAAGGTTGGTTGGGATGAATCAACCGCAGGAGAAAGGCCACCTAGAGTTTCTCTGTGGGAAATTGAGCCACTGACAACCTTTCCTATGTATCCATCCCTGTTCCCACTGCGAGTTAAGCATCCTTGGTATTCAGGACTTGCTGCTCTTCATGATGACAGCAATGCTTTGATGTGGCTGAGAGGAGTAACCGGTGAAGGGGGCTTTCATTCTTTGAACTTCCAGTCACCTGGTATAGGTTCCTGGGGACAACAGAGACTCCATCCATCCTTACTTAGCAATGACCATGATCAGTATCAAGCAGTGGTTGCTGCCGCAGCTGCCTCCCAGTCCGGTGGTTATCTGAAGCAGCAATTCCTACACCTTCAACAACCTATGCAGTCCCCACAGGAGCAGTGCAATCTCAATCCGCTGTTGCAGCAACAAATACTACAGCAAGCGAGCCAACAGCAGATGGTTAGTTCTGATGCTCAAAATATTCAGTCCGTGCTCAACCCAGGTGCTATTCAGCAGCAGCTCCACCAACTCCAGCAGATGCAGCATACTCATAATGACCAGAAGCAAAAGATTCAACCAGATCAACAGTACCAAGTTGCTAGCAGTGCGGTTCTCCCGAGTCCAACATCATTACCAAGCCATTTGCGTGAAAAATTTGGCTTCTCTGATCCTAATGTGAACTCTTCCAGCTTCATCAGCTCTAGCAGCAACGAAAACATGCTGGAATCAAACTTCCTTCAGGTAAGTTCAAAATCCGTGGATTTGTCTAGATTCAACCAACCAGTAGTTAGCGAGCAGCAGCAGCCGCAACAACAACAGGCATGGAAGCAAAAGTTTATGGGCTCACAGTCAATGTCTTTTGGGGGCTCGGTTTCGCTTAACTCGCCCACTAGCAAAGATGGTTCTGTTGACAACAAAGTTGGTCGTGATGTGCAGAACCAGTCCCTTTTTAGCCCTCAAGTCGACTCTTCCTCCCTACTGTACAATATGGTACCTAATCTTACCTCAAATGTTGCTGATAATAATATATCAGCGTTTCCCTCTGGATCAACATATCTGCAAAGTCCAATGTATGGTTGTCTGGATGACTCTTCTGGTTTATTGCAAAATACAGGAGAGAATGATCCGACAACTAGAACTTTTGTTAAGGTAATCATTTTTTAA
>Zm00001d001945_T001
ATGATGACGTCCTCGTACGAGAAGGCCACGTCGGGTGTCCTGAGGAACGCGGCGGCGCTGCTCGACGAAATGCAGCTCATGGGAGAAACGCAGGGTGCCAAGAAGGTGATCAACTCCGAGCTGTGGCACGCGTGCGCGGGGCCGCTGGTCTGCTTGCCGCAGCGGGGGAGCCTCGTCTACTACTTCCCCCAGGGGCACAGCGAGCAGGTTGCTGCTACCACTAAAAAGATACCCAACTCTCGCATCCCAAACTACCCGAGTCTCCCGTCGCAGCTGCTATGTCAAGTCCACAACATCACTTTGCATGCTGACAAAGAAACTGATGAGATTTATGCCCAGATGACCCTGCAACCAGTACACTCGGAAACTGATGTGTTCCCAATCCCAACGCTCGGTGCTTATACCAAAAGCAAGCACCCCAGTGAATATTTCTGCAAGAATTTGACTGCAAGTGATACAAGTACGCATGGTGGTTTCTCGGTGCCACGGAGAGCTGCAGAGAAGCTGTTTCCGCAGTTGGATTATTCAATGCAGCCTCCTAATCAGGAGCTTATCGTTCGAGATCTGCATGATAACATGTGGACATTCCGTCACATTTATCGTGGCCAGCCAAAGCGACATCTTCTAACAACTGGATGGAGTCTTTTTGTTGGTGCGAAACGGCTTAAAGCTGGTGACTCTGTCTTATTTATCAGGGATGAGAAGTCACAGCTCCTTGTGGGTGTTAGGCGGGCCACCAGACAACAACCGGCTTTGTCATCATCCGTCCTGTCTACTGACAGTATGCACATTGGTGTTCTTGCTGCTGCAGCTCATGCAGCATCAAGTGGTGGCTCGTTTACTGTTTACTACAATCCTCGGACAAGCCCGTCGCCATTTGTGATTCCTCTCGCAAGGTACAATATGGCCACATATCTGCAACCATCAGTTGGAATGAGATTCGCGATGATGTTTGAGACGGAGGAGTCAAGCAAGCGCAGATGCACAGGTACAATTGTGGGAATTAGCGACTATGAACCGATGCGATGGCCAAACTCAAAATGGCGCAACTTGCAGGTAGAATGGGATGAACATGGGTATGGAGAAAGACCTGAAAGAGTTAGTCTATGGGATATCGAAACTCCAGAGAACATGGTTTTCTCTTCCCCATTGAATTCGAAAAGGCAATGTCTTCCTAGTTATGGAGTTTCTGGCCTACATGTGTCATCAATTTCAAAGCCACAAGGAAGTCCTTTTGGTAACTTGCAGCACATGCCAGGGATCAGTTCAGACATTGCTTTGCTGCTTCTCAATCAATCTGCCCAGAACCTCGGGAGTTCAATTGCTTGTCAACAATCATCATTTTCCAGCATTATTCAAAATGCTAAGCAAAGCTATTTCCCTCCAACGACATTAGGTGCTTCCACTGGTTGGAATGAATCTCAGCAGCAGTTAAACGCCCTTGGTATTCAAAAAGGTGATCAAGTAAGCTGTGATGTTCAGCCAGGTATTGATTCAATCACTGCACCGGAGATGAATGTTAAACCAAGAGTCCCAAGAAGCACGGATTCATACTCAAGTCAGAGCATTTCGGATCCAAACAGCAAGAGTGACCCTAAAACAAAAACGCGAAGGAGCAAGAAGAGCTCGTCTCACAAAACCATTTCGGATAAATCTGAGATTTCTTCAGTACCTTCTCAGATCTGTGACAAGCAAAGGCATGGTTCAGAACCAACATCGGCAGACTTTGAAGCAGAACAAGCTACCTGTGGGAACAATGAGGATTCATCTGGTGCACTCACACGTGGTGATTTTGCTGGAGAGCTACAAGTTCAGCAGGTTGAACAAGATGGTCTACTTCCACCACCGAAGTTAGAGTCATCAAAGTCACCTGATGGAGGGAAGTCCGTCAGCTCGTTCCCAAACCAAGGGTGTTTCTCACAGTTCTTTGAGGGTCTGGATTGGATGATCCCGCCTTCCTGCTACCAAGACTCCAATGGCATCCATTCAGTTACCACATCGGATAGCATCTTTAATCCGTCTGAAGGTATACCACCTTCCACAATGAACGCGGACGGCATGGACGCGTTCCAAACCTCTTGCCTTTCCGAGTGCTTTCCTAATTCCATCCAAGAATTCATCAGCAGTCCAGATATAAACACACTGACATTTATGTCGCCTGAGATGCAACATCTGGATGCCCAACACGACGGCAGCAACTTGCAGAGCACGTCCAACTCCTATGTGCAGATGAGCTTCTCGGAGGAGAGCCAGAGTGCATCCTTAAGTGGCCTACACATGGAAGCTGTCCATATCAACAGCTCCTGCCTTCAACCACTGGCGACAGGGAGCTTTGATGCAGGGACGTTCTCAAAACTATCAAACATAAAAGAATGCCAGGCCTTGCCTCTGCAGGAGATTCACAACAGCTCCATGGGAACACCTTCGTGCAGTATGGATGCGGCGGCGGTCGAGTACTGTATGGATCGAAGTGTGAAGCCACTGAAACCACCGGTCCGGACATATACAAAGGTTCAAAAGTTAGGATCAGTTGGAAGATCTATCGACGTTACACGGTTTAGAGACTACCATGAGTTGAGGTCAGCCATTGCCTGCATGTTTGGACTACAGGGGAAACTGGAACACCCTGGCAGTTCAGACTGGAAGCTTGTTTATGTCGACTACGAGAACGATGTTCTCCTCGTTGGAGACGACCCGTGGGAGGAGTTCATCAACTGTGTGAGATGCATTCGGATCCTGGCGCCTTCGGAAGTACAGCAGATGAGCGAGAATGGCGTGCATGTCTTGAACGACTGCATGCAAATGGCTTAG
>Zm00001d002929_T001
ATGGGGCCACAGCCACCGCTTCACCTTCCCGCCGCCAACGGCGACAGCATCGTCGACCGCGACGTTTGGCTCGCCTGCGCCGTCCCGCTCTCCCGCCTCCCCGCCGTCGGTGCCGAGGTCTACTACTTCCCGCACGGCCACGCCGAGCAGTGCCCCGCGCATCTCCCGGCGCCGCTCCCGGCGCCGCACCTCTTCCCTTGCACCGTCGCCGGCGTCAGCCTTGGCGCGGACGACGAGACCAACGAGGTGTTCGCCAAAATCTCCCTCAGCCCAGGCCCCCACCGCGGGCCCGCCGCCGCTTGTCGTACCGACCCCACCAGCGACTGCCCGCCGCAGGAGCTCAGTTACTTCACCAAGGAGCTCACGCAGAGCGACGCCAACAACGGCGGCGGATTCTCCGTCCCGCGCTACTGCGCCGACCACATCTTCCCCACGCTCGACTTCGACGCCAACCCGCCCGTGCAGAAGCTTTTCATGCGCGACACCAGGGGCAACCCGTGGCAGTTCCGCCACATCTACCGCGGCACGCCACGCCGCCACCTGCTTACCACCGGCTGGAGCAGGTTCGTCAACGCCAAGCTGCTCGTCGCGGGGGACATCGTCGTCTTCATGCGCCGCCACAACGGCGACCTCATCGTCGGCCTGCGCCGCACGCCCAGGTACCCGCTCGTCTTCCCCAGGGTCGGGTCCGGAGCCGGGGTCGACCCGGACCAGCCCCCGCCCCGCAACGCGCGCGCGCGGGTACCGCCCCAGGACGTCATTGAGGCCGCACGCCTCGCCGCGGAGGGCAGGTCCTTCGCGGTCACCTACTTCCCGAGACAGGCCGCCGGGGAGTTCATCGTCCCGCGCGACGAGGTGGAGGGCGTGCTCGCCACCCGCTGGGAGCCAGGCGCGCAGGTGCGTATGCAGGTCATGGAGGCCGAGGACACGCGGCGCACCGTGTGGGCCGACGGCCACGTCAAGTCGCTCCACCAAAACATCTGGCGAGCGCTCGAGATCGACTGGGATGATTCCTCTCCATTATCACCAAATCTGAGCAGATTTGTGAATGCTTGGCAAGTCGAGCTTGTTACACACCCTCCTCTTCCAAATGGAGCGAGGATCTGCAACCCAATTGCGTCTCTTTGCCATGGAGATGTCTCTTATCCACTGATCGGATCGGAAATCCAGGGGCCACCAATTCCTGCTAGCATGCAGGGAGCCAGGCACACCGGCCCTTGTGCTGCGCCCTCTGAATCTTCTGCAGTGCTCACGAATCGGGTACTGTTCCCCCTGCTCAACCCGGACCTCCAGATGCCACCGTTTACAAGCCCCAGTGATTCCTCTGAGATTCTGGATCCTGAATCTGCTTCTCCTCCCAACAAATCAGTAAGGTTGCCTCCAGCAGAGCTTCCAGTCCAAGTGAAGAGCATACAGCTCTTTGGCGCCACAATCATGGTCCATGTTGTGCGAAGTGTTGCCTGTGGTGGTTGTTGTGAAGAACTGAATGGAGCTCCTAGTGGTGATGCTACGGCTGATGGCAGTGTCGGAAAAGATGTCTAA
>Zm00001d003011_T001
ATGAGCGAGGGGAGCAGGAGCGCCAGGGACGGCCAGCAGCACCAGCAGCCCAGGCCGGTGTCTTTTACCAAGGTGCTGACGGCGTCCGACGCCAATAACGGCGACGTCTTCTCCGTGCTGGCCAACTGCGCAAAGGCCGTCTTTCCGGAGCTGGACTACAGCCTCGGCACGCCCAAGCAGTTCGTCTGCGTCAGGGATGTGCACGGCGTCGAGTGGATGTTCTGCCACATCTGGCGGGGCTCCCCGAAACGCCACCTGCTCACCGCCGGGTGGAACAACTTCGTCAACACAAAGAAGCTCCGGTTCGGCGACTCCGTCGTCTTCATGCGCGAAGAGGACAGCAAGATCCACGTAGGCCTGCGGCGCACCAACCGCTTGTTCGGGGCAATGCAGGGCAATGGGGGCGGCCCGGCCGGCGCCGTCGTGGGTCCATCAGACGGAAAGGTCTCGACGGAGGACGTGGTCGCGGCGGCGAGGCTGGCCGGCGCTGGGCTCTGGTTCGAGGTGGTGTACTACCCGCATGTGGCCTCGTCAGAGTTCTGCGTGAGTGTGGCCGCTGTCAAGGAGTCCATGCAGGTCCCCTGGTTCCCCGGTCTGCAGTTGTAG
>Zm00001d003601_T001
ATGGCCGCGGCGATGGACGCGCCCAACCCTGGAGCGGCTGCTGGCCCAGGAATGCCTAGTGACGCCCTGTACCAGGAGCTGTGGCATGCGTGTGCTGGCCCGTTGGTCACAGTACCTAGACAAGGCGAGCGTGTCTATTACTTCCCTCAGGGCCATATGGAGCAGCTCGAGGCGTCTGCACACCACCAGCAGCTTGATCAGTACTTACCGATGTTCGATCTACCACCCAAGATCCTATGCAGAGTAGTCAACGTGGAACTACGGGCCGAAGCTGATTCAGATGAAGTTTATGCTCAAATTATGTTGCAGCCAGAAGCTGATCAAAATGAACTCACCAGCCTGGACGCTGAACCACAAGAACGTGAAAAATGCACTGCCCATTCCTTCTGCAAGACACTGACAGCTTCAGATACGAGCACTCACGGCGGGTTTTCTGTTCTTCGGAGGCATGCTGAGGAATGTCTTCCTCAGCTGGACATGTCTCAAAATCCACCTTGCCAAGAACTGGTTGCCAAAGATCTCCATGGCACTGAATGGCATTTTCGGCACATTTTTCGAGGGCAACCCAAGAGGCATCTCCTTACCACCGGCTGGAGTGTCTTTGTTAGCTCAAAAAGATTGGTTTCTGGGGATGCATTCATCTTCATGAGAGGTGAAAATGGTGAGCTACGGGTTGGTGTAAGGAGGCTCATGAGACAAGTAAATAGCATGCCGTCATCTGTCATATCAAGCCACAGCATGCATCTTGGAGTATTGGCCACAGCCTCCCATGCCATCTCCACTGGAACCCTCTTTTCTGTTTTCTACAAACCAAGAACTAGTCGCTCTGATTTTATTGTGAGTGTGAACAAGTACCTTGAAGCTAAGAAGCAGAAAATATCTGTTGGAATGAGGTTTAAGATGAGATTTGAAGGTGATGATGCTCCTGAAAGAAGGTTCAGCGGAACAATCATTGGCATCGGGAGTTTGCCGGCAATGTCAAAATCTCTGTGGGCAGATTCTGACTGGAGATCTCTAAAGGTTCAATGGGATGAACCTTCATCCATTCTTCGTCCAGATAGAATCTCACCATGGGAAGTGGAGCCACTGGATGCAGCTAATCCACAATCCCCTCAACCTCCACTAAGGGCTAAGCGTCCACGACCCCCAGCTTCACCTTGTATGGTTTCGGAACTGCCTTCAGGTTTTGGACTCTGGAAATCCCCAATTGAATCATCCTGTACACTCTCATTTTCGGAACCTCAACGGGCTCGAGAGTTATTTCCTTCAATCCCCACGTCAACCTTGTCATCTTCATCAAATGTCAGTTTTAATTCAAAGAATGAGCCGTCCATGCTAACCAGTCAGTTCTACTGGTCAGCAAGGCATACAAGAGCTGACTCCTGCGCTGCTAGCACCAACACAGTCGTAATTGAAAAGAAGCAAGAGCCAAGTTCTGGTGGTTGTAGATTGTTTGGAATTAATATATGCTCAGCTGAGGAAGAAGTATTACCTGAGGTTACTGCTCCAGGTGTTGGTTATGAGCAGACTGCTGCCTCTGTAGAGTTGAACTCGGATAAGCTCTCACAGCCATCTGATGTCAACAATTCTGATGCCCTAGCAGCTAGCAGTGAACGTTCACCTCTTGAATCCCAAAGCCGGCAAGTGAGGAGCTGTACCAAGGTAATTATGCAAGGAATGGCAGTAGGAAGGGCTGTAGACCTGACAAAGCTTAGTGGCTACAGCGATCTTTGCCAGAAGCTGGAGGAGATGTTTGACATCCAGGGGGAGCTGGGTTCCACACTAAAGAAATGGCGGGTCATTTTCACTGATGATGAGGATGACATGATGCTTGTTGGAGATGATCCTTGGGATGAGTTTTGCAGGATGGTGAAAAGGATTTACATTTACACATACGAGGAGGCAAAGAAGCTGACATCCAAGTCAAAGTTACCGGTTAGCAGTGACAGCAGCAAGCTGAGCGCTGCGAACTCACTGTCTGAATGA
>Zm00001d011953_T001
ATGCCGCCCGCAGCCATGGCGCTGCCGTCCCAGGCCCCGTCTAACTCAGGGGATCCGCTGTACCCGGAGCTCTGGCGCGCCTGCGCCGGCCCGCTCGTCACCGTCCCCCGCGTCGGCGACCTCGTCTTCTACTTCCCCCAGGGACACATCGAGCAGGTGGAGGCGTCCATGAACCAGGTTGCCGGGAACCCGATGCGTCTCTACGATCTGCCTTCCAAGCTGCTCTGCCGCGTGCTCAACGTCGAGCTGAAGGCGGAGACCGACACCGACGAGGTGTACGCGCAGATCATGCTCATGCCGGAGCCCGAGCAAAACGATGTGGCTGCCGAGAAGACGAGCTCTGGGTCTGCTGCGCCACCGAGGCCAGCGGTCAGGTCATTCTGCAAGACGCTCACCGCCTCCGACACCAGCACACACGGCGGCTTCTCTGTCCTGCGCCGCCACGCTGACGAGTGCCTCCCTGCCCTGGATATGTCCCAGTCGCCTCCCACTCAGGAGCTGGTGGCGAAGGATCTGCATGGCATGGAGTGGCGATTCCGCCACATCTTCCGCGGGCAACCCAGGAGGCATCTCCTTCAGAGTGGTTGGAGTGTTTTTGTCAGTTCCAAAAGGCTTGTTGCTGGAGACGCCTTCATTTTCCTCAGAGGAGAAAACGGTGAACTTCGAGTTGGTGTTAGGCGCGCTATGAGGCAGTTGTCTAATGTACCTTCTTCGGTTATATCTAGCCAAAGCATGCATCTCGGGGTTCTTGCGACTGCATGGCACGCTATTAACACAAAGTCCATGTTCACTGTCTACTACAAACCTAGGACGAGCCCTTCAGAGTTCATCATTCCATATGATCAATATATGGAGTCAGTAAAAAACAATTATTCTATTGGGATGAGATTCAGGATGAGGTTTGAAGGGGAAGAGGCCCCCGAGCAGAGGTTTACTGGTACAATAGTTGGCTGTGAAAATCTTGACCCACTATGGCCTGATTCCAGTTGGAGATACTTGAAGGTGCGCTGGGATGAGCCTTCTACTATCCCGCGGCCAGATAAGGTCTCTCCCTGGAAGATAGAGCCTGCTTCATCACCTCCTGTTAATCCTCTCCCTCTTTCTAGAGGAAAAAGACCTAGACAAAATGCACCTCCACCTTCCCCTGAATCATCTGTTCTCACAAAAGAAGGTGCAACCAAGATTGATACTGATTCTGCTCAAACACCACATCAAAATTCGGTCTTGCAAAGTCAAGAGCAGATGAGCTTTAGGAACAACCTGACTGAAAGCACCGACTCTGATTCCACTGTTCAGAAGCAGATGATGTGGTCCCCATCACCCAATGGGAAAGTTCACACTAATTTTCAGCCGAGACCTGCTATGGATAACTGGATGCCATTGGGAAGGCGTGAAACTGACTTCAAGGACACCCGTTCTGCCTTCAAGGATGCCCGCACCGCTTCTCAATCGTTTGGAGATACACAGGGGTTCTTTATGCAAGCTTATGATGACAGTCGTCACCGTCTTTCTTTCAACAATCAGTTTCAAGATCAGGGTTCAGCTCATCGCTTTGCAGATCCATACTTCTATATGCCTCAACAACCTTCTCTGACGGTTGAATCAGGCACAAGGACGCAAACAGCGAACAATGACTTGCGTTTTTGGAGTGAGCGGAATTCGATGTATGGTAATCCAAGTGACCAACAGCAGGGTTTCAGCTTTGGGCAAAACACATCAAGTTGGTTGAACCAGCCACTTCCCCAGGTTGAACAGTCACGAGTGGTCAGGCCGCATGCAACGGTTGCTCCATTTGATTTAGAGAAGACTAGAGAAGGCAGTGGGTTCAAAATATTTGGTTTCCAAGTTGATACAACCAATCCATCACCTGTCCAATTGAGCTCTCCATTGTCTGCTATCCGAGAGCATGTGGTACAAACTCGACCATCGGCACCAGTGAATGAATTGCAACCTGTGCAAATTGAGTGCTTGCCTGAGGTGTCCGTAAGCACAGCTGGAACTGCAGCTGAGAACATTCAGCAAGTCCAGCAAAGTTCGAAAGATATTCAAAGCAAGTCCCAGGGCGCTTCAACAAGGAGCTGTACAAAGGTTCATAAGCAAGGAGTTGCGCTTGGCCGGTCCGTGGACCTCTCTAAATTCACCGACTACGGTGAGCTCAAAGCGGAACTAGACAAGATGTTTGAGTTCGAGGGCGAATTGGTATCTGCTAACCGGAACTGGCAGATCGTTTATACCGACAACGAGGGTGATATGATGCTTGTCGGAGATGACCCGTGGGAGGAGTTCTGCAACATAGTGCGCAAGATCTACATCTACACGAAGGAGGAGGTCCAGAAGATGAACTCGAAATCATCCGTGCCGAGGAAGGAGGAACCCCCAGCAGCAGGCGAAGGCTGCGCCGCCGCCGCCGCAAACGAGTAG
>Zm00001d012731_T001
ATGGGCATCGATCTCAACATGGTGGACGGCGAGGGCCACGAGCGCCGCCCGCCGCCGGTGACGTGCCGGGAGCTGTGGCACGCGTGCGCGGGGCCCGTGGTCGCGCTACCGCGCCGGGGCAGCCTGGTCGTGTACCTGCCGCAGGGCCACCTGGCCGCGGCGGGCGGCGGGGACGTCGCTGCGGACCTGCCGCCGCACGTGGTGTGCCGCGTCGCGGATGTCGAGCTATGCGCGGATGCGGCGACGGACGAGGTGTGCGCGCGGCTGGCGCTGGTTGCGGAGGGCGAGGCATTCGGGAGGAATCTGGGCGGTGGTGGAGTTGAAGGGGACGATGGCATGGAAGATTTCGATGCTGAAAGGAAGTCCGGGATGCTGCACATGTTCTGCAAAACGCTTACGGCCTCTGACACAAGCACGCATGGAGGGTTCTCTGTTCCTCGCCGTGCTGCTGAGGACTGTTTCCCGCCTCTGGATTATAATCAGCTCAGGCCTTCTCAAGAGCTGGTTGCCAAGGATTTGCATGGAGCCAAGTGGAAGTTTCGTCATATATATAGGGGTCAGCCTCGTAGGCATCTCTTGACTACTGGATGGAGTTCATTTGTCAATAAAAAGAAACTGGTTTCAGGGGATGCTGTGTTATTTCTCCGAGGTGATGACGGTGAACTAAGGCTGGGTGTGCGGAGGGCTATTCAGCTTAAAAATGAGGCCCTTTTTGAAGATTTCAATAGTGACAGCACAAAGCGGCATTCTTTGACGGCTGTAGCTGATTCCTTGAAGAACAGAAGTGTTTTTCACATTTCTTACAATCCAAGAGCTACTGCTTCAGAATATATTATTCCATACGCTAAGTTCCTGAAGAGCCTCAATCATCCGGTCTGTATTGGAGCAAGGATCAACTTTCAGTGCCATAATGAAGATGTTAGTGAAAGGCGATCTGGAGTGGTTGTTCGCATTAGTGAAATAGATCCCATGAAATGGCCTGGCTCGAAGTGGAGAAGCCTGCTGGTAAGATGGGAGGACGGTGCTGAATGTAATGGCCAAGATAGAGTATCTCCATGGGAGATCGAGATAGCTGGTGGTTCTGTCTCTGTTTCTCATTCTCTTTCTGCATCTAGTTCTAAAAGAACCAAGTTGTGTCCTCAGGGAAATTTGGACGTTCCAGCAATGTGGAATGGTTGTACTGACTCCATGGAAACTGGAAAGTTACCCAGGGTCTTGCAAGGTCAAGAATTGATGAGTTTTAGGACTTGTCATGTTCCGTGTGCTCCTCAAACTGCTGAGGCTGCAAAACTTCAATCTTCTGATGCTAGTAGGTTCCTTAGTAATGCACATGGCTGCGCATTGGGTGGTCCAACAAGCAGACTCGCAGTGCATAGCTCTGGTTTTACCTACCAATGTGTAGGCTTCAATGAATCTATTGGATTCTCAGAGGTCTTGCAAGGTCAAGAAATTTCTCGGGCGGTTCCTAAGTTCCAAGGAATGATGTCGGAAGCTTGTTCACTGAAAGACAGATATGGGCTGCATAGTTATATGCGTGCCCCAGTTGCTGTTAATGGATTATCAGCTACAACTCAAGAATGTTCTCTCGCACTATCTACTCCGCCAGGAGCACAAGTGCCCTCTCTCTACCCTGGTAATGTTGTTAACCGAACTGTGGTTCCACAACTTGGACTGGCAAGGAAGTTTGGTGGTGGAGGTACAAATGGCCAGCAGTCTGGCCCATTTGATAGGCCGAGGGAACTTTGGACCAGGCCACAGCATGAAACACCTGACCAAATGAACTTGGATCAGTTTGAGACTAGAAGACCTTCAGTGCCTGTAGATGCTGCTAAGCTTGGGTCTGGTGGAGGGGAGGTTCGCAAAACTAGCTGCAGACTTTTTGGTTTCTCCTTGACTGAAAAGATCTTGCCAGCAGATGATGATGACGTCAAGGAAGTGAGCTATGAGACTGAGTGCCAGAACCCACGGATGCTGGACCTGTTCGGGTACAACTGCTCAACACCGAGTGCCGCTCTTCCAGCTCTGTGTGCTGCCGCCCCCTTTGGAATGTGA
>Zm00001d014013_T001
ATGAAGGAGGCGGGCGAGGAGAGGTGCCTTGACCCGCAGCTGTGGCACGCGTGCGCCGGCGGCATGGTGCAGATGCCCCCCGTGCGCTCCCGTGTCTACTACTTCCCGCAGGGCCACGCGGAACACGCGCACGGCGGCGGCGGCGCCACGGACCTCGCCGGGGCGCGGGCGCGACCTCTCCCGCCGCTCGTGCTCTGCACCGTCGCCGGGGTGCGCTTCCTGGCCGATCCGGAGACCGACGAGGTCTTCGCCAAGATCCGCCTCGTGCCGGCCGCGCCCGGCGAGGTGGAGTTCGGAGAGCCCCGCGAGTTCGGCATCGACCCCGAGGACGCCCGGGAGAAGCTGTCCTCCTTCGCCAAGACGCTCACGCAGTCCGACGCCAACAACGGCGGCGGCTTCTCCGTGCCGCGCTACTGCGCCGAGACCATCTTCCCCAAGCTCGACTACCGGGCCGACCCGCCGGTGCAGACGGTGCTCGCCAAGGACGTGCACGGGGAGGTCTGGAAGTTCCGCCACATTTTCCGGGGCACGCCGCGCCGGCATTTGCTCACCACGGGATGGAGCGCGTTCGTCAACCAGAAGAAGCTCGTCGCCGGGGACTCCATCGTCTTCCTGCGCACCGAGCATGGCGAGCTGTGCGTCGGGATACGCCGTGCCAAGCGGGTGTCCTGTGGTGGCATGGAGTGCATCTCTGGCTGGAACGCCCCGGTGTACGGGGCCTTGTCGGCGTTCTTGAAGGACGAGGAAGGTAAGATCACTAAGGGTCCTGGTGGGTACATGAGAGGCAGGGGGAAGGTGGAGATCACGGACGTTGTTGAGGCCGCAAGCTTAGCCGCGAGCGGGCAGCCATTTGAGGTGGTGTACTACCCGAGAGCTAGCACTCCAGAGTTTGTTGTGAAGGCTGCATCGGTACAGAACGCGATGAGGAACCAGTGGTGCCCTGGGATGAGGTTCAAGATGGCATTTGAGACAGAGGATTCGTCAAGGATCAGCTGGTTTATGGGGACGATAGCTTCTGCTCAGGTTGCTGACACAATCAGATGGCCAAATTCACCGTGGAGGCTTCTTCAGGTTTTGCTTCATCCCATGTTTCCCATACCTATATGCCATACTTCATTATGA
>Zm00001d014377_T001
ATGAGGCTCTCGTCGTCGTCCGGCAGCGTCCTGCCGGCTCAGCCGGGCTCGCCGGAAGCTGTGGAGGAGCACAAGTGCCTGAACTCGGAGTTGTGGCATGCTTGTGCCGGCCCGCTTGTTTCCTTGCCCGCGGTGGGTAGCCGAGTTGTGTACTTCCCTCAGGGCCACAGCGAGCAGGTAGCAGCATCAACAAACAAGGAAATAGAGTCTCAGATCCCCAACTATCCTAATCTGCCGCCACAGCTTATATGCCAACTTCATAATGTGACGATGCATGCTGATGCAGAGACAGATGAGGTATATGCACAGATGACACTACAACCACTCAACCCGCAAGAACTGAAGGACCCATATTTACCTGCAGAATTAGGTTCGGCCAATAAACAGCCAACAAACTATTTCTGCAAAACATTAACAGCAAGTGATACCAGTACCCATGGTGGGTTCTCCGTTCCCCGTCGAGCAGCTGAGAAAGTGTTTCCTCCACTGGATTTCACCCAGCAACCCCCATGCCAGGAGTTGATGGCAAAAGATCTTCATGGCAATGAGTGGAAATTCCGTCACATCTTTCGTGGCCAGCCAAAGCGGCATCTTCTAACTACAGGTTGGAGTGTCTTTGTAAGTGCAAAGAGACTCGTTGCTGGCGACTCTGTCCTTTTTATCTGGAATGACAATAACCAGCTTCTGCTGGGAATTCGTCGTGCAAATCGGCCACAAACTGTCATGCCATCTTCAGTCTTATCAAGCGATAGCATGCATATCGGTCTTCTTGCTGCAGCTGCTCATGCTGCTTCGACAAATAGCCGATTTACAATTTTTTACAACCCAAGGGCAAGCCCTTCAGAGTTTGTCATACCACTCGTAAAGTATGTTAAGGCTGTGTATCATACCCGCATATCTGTGGGGATGCGATTCAGGATGCTTTTTGAGACAGAAGAGTCTAGCGTTAGGAGATACATGGGGACAATTACCGGAATCTGTGATCTTGATTCTGTTCGGTGGCCAAATTCACACTGGCGTTCTGTTAAGGTTGGCTGGGATGAGTCAACTGCTGGTGAGCGACAACCAAGGGTGTCACTATGGGAGATTGAACCCCTGACAACTTTCCCAATGTATCCATCTCCTTTTCCGCTCAGGCTCAAGCGTCCATGGCCAACAGGCTTGCCTTCTCTGCATGGTGGGAAGGATGATGACCTGGCTAACTCTCTCATGTGGCTTCGAGATACCGCAAATCCTGGTTTTCAGTCGTTAAATTTTGGTGGACTTGGTATGAGCCCTTGGATGCAGCCAAGGCTGGATGCTACCTTACTTGGTCTGCAACCTGACATGTATCAGGCGATGGCCACAGCTGCTTTTCAGGATGCAACAAAGCAGGCATCGCCCACAATGCTGCAGTTCCAGCAGCCCCAGAACATAGCTGGCCGGGCTTCCCCGCTTCTTTCAAGTCAGATTTTGCAGCAAGCACATCATCAATTTCAGCAGCAACCGTACCTTCAAAACATCTCTGAGAGCACAATCCAAGCACAGGGTCAGTCTGAGTTCCTCAAGCAGCAGATCCAACGCAGCCAGTCATTCAATGAGCAGAAGCCCCAGATGCAACACCAGCAAGAATCACAGCAGCAGCAGCAACCACAGTGTCTGCCAGTCCCCCAACATCAGCAAATGCAACAACAGAATATGACCAACTACCAGTCTATATCTAATGCATTATCACCGTTTTCTCAGCTGTCGCCAGTTTCTCAGTCTTCACCTATGGCGCTGCAGACTATATTACCGTTCTCGCAGGCACAGAGCTTCACAGACACGAATGTAGGTTCATTGTCTCCATCCAATGGTAACACCATGCAAAACACACTGAGGCCGTTCTCATCAGAAGCAGTTTCTCACCTCAGTATGCCGAGGCCCACTGCGATACCTGTCGCAGACCCATGGTCGTCGAAGCGTGTCGCGGTGGAGTCTCTGCTTCCTTCTCGGCCTCAGGTTTCATCCCAGATGGAACAATTGGACCCTGCACCAGCTAGTATACCTCATAGCTCTGCGTTGGCACCACTTCCCGGAAGAGGGTGCTTGGTTGACCAAGATGTGAACTCTGATCCTCAAAATCATCTCTTGTTCGGTGTTAGTATAGACTCGCAGTCACTGCTAATGCAAGGGGGCATTCCTGGTCTCCAAAACGGGAATGATTCAGCTGCTATACCTTATTCCACTTCCAATTTCCTCAGCCCTTCTCAGAATGACTTTCCTCTGGACCATACACTAAATTCTTCAGGCTGCTTAGATGATTCTGGGTACGTCCCGCCATGTTCAGATAATTCTGACAAAGTGAACCGACCACCAGCGACCTTCGTGAAGGTTTACAAATCTGGAACCTACGGGAGGTCGCTTGATATCACTAGGTTTAGCAGCTATCACGAGCTCCGTAGGGAACTGGGGCGCCTATTTGGCCTTGAGGGCCAGTTGGAAGACCCATTGAGATCAGGCTGGCAGCTTGTATTCGTCGACCGTGAGGAGGACGTCCTTCTCGTGGGCGACGACCCTTGGCAGGAATTCGTGAGCACGGTGTCCTGCATAAAGATCCTCTCCCCGCAGGAGGTGCAGCAGATGGGGAAGCAGGGCCTGGAGCTCCTGAGCTCGGCCCCCGCGCGGAGGCTCGGTAGCAGCTGTGACGACTACGTCAGCAGGCAGGAGTCGAGAAGCCTGAGCACCGGGATCGCGTCCGTCGGTTCGGTCGAGTTGGGATGA
>Zm00001d014507_T001
ATGATTACTTTCGTGGACTCGGCGGCCATGGAGCGGGAGCGGGAGAGTGACAGGTGCCTGGACCCGCAGCTGTGGCACGCCTGCGCCGGCGGGATGGTCCAGATGCCGGCGGTGCACTCCAAGGTGTACTACTTCCCGCAGGGCCACGCGGAGCACGCGCAGGGCCCCGTGGACCTCCCCGCCGGCCGGGTCCCCGCGCTCGTCCTCTGCCGCGTCGCCGCCGTCCGCTTCATGGCCGATCCGGACACCGACGAGGTCTTCGCCAAGATCCGCCTGGCCCCGGTCCGTCCCAACGAGCCGGGCTACGCCGACGACGCCATTGGCGCCGCGGCGGCGTCGGGCGCGCAGGAGGACAAGCCCGCGTCCTTCGCCAAGACGCTCACGCAGTCCGACGCCAACAACGGCGGGGGCTTCTCCGTGCCGCGCTACTGCGCCGAGACCATCTTCCCGCGGCTCGACTACTCGGCCGACCCCCCCGTGCAGACCGTGCTCGCCAAGGACGTGCACGGCGTGGTCTGGAAGTTCCGCCACATCTACCGCGGCACGCCCCGGCGCCACCTGCTCACCACCGGCTGGAGCACCTTCGTGAACCAGAAGAAGCTCGTCGCGGGGGACTCCATCGTGTTCATGCGGACGGAGAACGGGGACCTCTGCGTCGGCATCCGGCGCGCCAAGAAGGGCGGCATCGGAGGGCCGGAGTTCATGCACCACCACCACCAGCAGCCGCCCCCGCCGCAGGGCGGCGGGTACGCCGGGTTCTCCATGTTCCTGCGAGGGGAAGAGGACGGCGGCAAGATGATGGCCGCGGCCGCCACGAGGGGGAAGGCCGCCAGGGTGCGGGTGCGGCCAGAGGAGGTCGTCGAGGCCGCTAACCTGGCCGTGAGCGGGCAGCCGTTCGAGGTGGTGTACTACCCGAGGGCGAGCACGCCAGAGTTCTGCGTCAAGGCGGGGGCGGTGCGCGCCGCCATGCGCACCCAGTGGTGCCCCGGGATGAGGTTCAAGATGGCCTTCGAGACGGAGGACTCGTCCCGGATCAGCTGGTTCATGGGCACTGTCTCCGCCGTGCACGTCGCTGACCCCATCCGATGGCCCAATTCACCCTGGAGGCTTCTCCAGGTCGCCTGGGATGAGCCGGACCTGTTACAGAACGTGAAGAGGGTGAGCCCATGGCTGGTTGAGCTGGTGTCGAACATGCCGGTCATCCATCACCTCACAGCCACGCCCTTCTCGCCGCCCAGGAAGAAGCTGTGCGTCCCACTGTACCCGGAGCTTCCGCTGGAGGGCCAGTTCCCGGCGCCGATGTTCCACGGAAGCCCCCTCCTCGGCCGTGGCGGCGCCGGTGGCCCGATGTGCTACTTCCCGGACGGCACTCCTGCAGGCATACAGGGAGCCAGGCATGCTCAATTCGGCATATCCTTATCAGATCTCCACCTGAACAAGCTGCAGCCGGGCCTGTCACCGCACGGGCTCCACCGCCAGCTCGACCACGGCGTGCAGGTGCAGGTGCAGCAGCCGAGGATCGCCGCCGGGCTCATCGTCGGCGGCCACCCGGCGGCCCGAGACGACGTCTCGTGTCTGCTCACCATCGGCACCCCAAAGAGCAAGAAGCCACCGTCAGACGTCAAGAAGGCGTCCACGGCGGCGGCACCGCAGCTGATGCTCTTCGGGAAAGCGATCCTCACCGAGCAGCAGATATCGCTAGGCGGCGGCAATGTCGTGCCGGCGCTGGCGAAGAAGAGCCCCTCCGACGACGACGACGACGTGGCCGAGAGGACGGTGAGCAACTCGGACGTGTCGAGCCCTGGGAGGAGCAACCAGGACGGCACGTCCAGTGGCGGAGGCCCGGCGGCGCGGGCGTGCTGGCAGGAGGAGGAGTGCAACAACAGGGCGGCAGGTTCTGAGGACGACCTCCTCGGGCACTGCAAGGTGTTCATGCAGTCGGAGGACGTCGGGCGCACGCTGGACCTCTCCGCCGTCGCGTCGTACGAGGAGCTCTACCAGAGGCTCGCCGACATGTTCGGCGTCGACAAGGCCGAGCTGACCAGCCACGTGTTCTACCGCGACGACGCTTCCGGAGCGCTCAAGCACCCTGGCGACGAGCCTTTCAGTGAGTTCACCAAGACCGCCCGGAGGCTGACCATACTGACGGACGAGAGCAGCGACAGCTTAGCGAGGTAG
>Zm00001d014690_T001
ATGCAAAAGGATGTTGACGGACATGTTCCAAGCTACCCAAATCTTCCGTCGAAGTTGATTTGCCTTCTGCACAATGTCACTTTACATGCGGATCCAGAAACAGATGAAGTGTATGCACAAATGACTCTTTTGCCAGTTACTTCATATGGAAAGGAGGCGCTGCAACTATCGGAACTAGCGCTGAAACAACCAAGGCCTCAAACAGAGTTCTTCTGTAAGACACTAACTGCAAGTGACACAAGCACTCATGGAGGCTTCTCCGTGCCTCGTCGAGCAGCTGAGAAGATATTTCCACCCCTTGATTTCTCCATGCAACCGCCCGCTCAAGAGATCCAAGCCAGAGATTTACATGATAATGTGTGGACATTCCGCCACATATATCGAGGTCAGCCAAAAAGACATCTGCTTACCACTGGCTGGAGTCTTTTTGTGAGCGGAAAGAGATTACTTGCTGGTGATTCTGTCATTTTTGTTAGGGATGAAAAACAGCAACTTCTCCTTGGAACCAGGCGTGCTAATAGACAGCCAACTAACATATCATCATCTGTCCTTTCAAGTGACAGCATGCATATAGGAATTCTTGCTGCTGCAGCCCATGCCGCTGCCAACAATAGCCCATTCACCATATTTTATAATCCTAGGGCCAGTCCTACAGAGTTTGTTGTCCCGTTTGCTAAGTATCAGAAGGCACTCTATGGTAATCAAATATCTTTAGGAATGCGCTTCCGCATGATGTTTGAAACTGAAGAATTAGGCACAAGAAGGTACATGGGTACAATAACTGGTATAAGTGATCTAGATCCAGTAAGATGGAAAAACTCACAATGGCGCAACATACAGGTCGGCTGGGATGAGTCTGCAGCAGGCGAAAGGCGGAACAGGGTTTCAATCTGGGAAATCGAACCGGTTGCTGCTCCTTTTTTCATATGCCCTCCACCATTTTTTGGTTCAAAACGTCCCAGACAATTAGATGACGAGTCCTCAGAAATGGAGAATCTTTTAAAGAGGGCAATGCCATGGCTTGGTGAGGAGATATGCATAAAGGATCCACAGACGCAGAACACCATAATGCCTGGTCTGAGCTTGGTTCAGTGGATGAACATGAATATGCAGCAGAACTCATTTGCAAACTCGGCTATGCAGTCCGAGTACCTACGATCGCTAAGCAACCCCAACATGCAAAATCTTGGCGTGGCTGATCTCTCAAGGCAGTTAAACCTTCAGAACCAGATTCTGCAACAGAACAGCATTCAGTTTAGTTCTCCTAAACTGCCTCAACAAATGCAGCTGGCCAATGAGTTGTCAAAGGCATCTCTTCCACTGAATCAGATTGGTGTGGGCACCAAACCTCAAGAACAGACTCAAGACCCAAACAATCTGCAGAGGCAACAACAGTCCATGAACCAACTACTTCCATTGAGCCAATCTCAAACCAATCTTGTCCAGGCTCAGGTCCTTATCCAGAATCAAATGCAGCAGCAAAAGCAACCAACATCCATGGCTCAAAATCAGCAGCCAGCTGCCAGCCAGTCACTGATCCTGCCCCAGCAGCAGCAACAACAGCAACAACATCAACAACAAAAGTTGGTACATCAACAGCAGCAGATTTTACTGCAGCAGCAACAATTGCAGCAACAGCAACAATTGCAGCAACAGCAACAAAATCAGCAACAGCTAAATAAGATGGCTGCACAAATGCCAAATCTGGCATCACATCAGCCGCAACTGTCTGATCAGCAGCTTCAACTGCAACTGTTACAAAAACTGCAACAGCAGCAGCAGTCGTTGCTATCACAACCAGCTGTTACTCTTGCACAATTACCCCTAATCCAAGAGCAGCAAAAGTTGATTATTGATATGCAGCAGCAGTTGTCAAATTCTCAACCACTTTCCCAGCAACAAACAATGCCCCAACAAAGTATTCAAGTTCCATCACGGGCAACACCACCACCAACAACAACCGTGCAACAAGAGTCACAGCAAAAGCTTCCACAAAAGCATGTTGGGTTCACTGACACATCACATACCACCATTCCTCCGACTACATCAGTCAACACCATTTCAGTTGTAGGAAGTCCTCTGATGGCAACTGGTGCCACACATTCTGTAGTTACTGATGAAATTCCTTCCTGCTCAACATCACCTTCAACAGCTAATGGCAACCATATTGTGCAACCAGTCCTCGGAAGGAACCAACTATGCAGCATGATCAACTATGAGAAGGTGCCTCAGTCTACTCCTATGTCGATCCCAAGCTCCCTGGAAGCTGTCACAGCAACGCCAAGATCAATCAAGGAATTGCCTAAGTTGAATTCTAATGTCAAGCAAAGTGTAATGGCTTCAAAGCTACCAAATGCAGGGCATGTAGCTCAAAATTTGACTAACAATGCACCCCCGACGGACTATCCGGAAACAGCTTCATCAGCAACTTCAGTGTGGCTTTCCCAAGCGGACGGGCTTCTACATCATAGTTTCCCCATGTCTAACTTTAATCAGCAGCAGCAGATGTTCAAAGCTGCGGCTCCTGAGACTGATATTCAGGGTGCAGATCCCAGTAATAACACACTCTTTGGAATAAACGGTGATGGTCAGCTGGGCTTTCCCATGGGAGCAGATGATTTCTTATCAAATGGAATTGATGCTTCCAAGTATCAGGGTCATATTTCAACAGATATTGATGGTAACTACAGGATCTCAAAGGATGGCCAGCAAGAAATATCGTCATCCATGGTTTCACAGTCGTTTGGTGCATCAGATATGGCATTCAATTCAATTGACTCTGGTATGAATGATGGTGGTTTCGTGAACAGAACCTCTTGGCCTCCTGCTCCTCCCTTAAAGAGGATGAGGACATTTACCAAGGTGTACAAACGTGGAGCTGTAGGTCGGTCCATTGACATTAGTCAGTTCAGTGGATACGATGAGTTGAAGCATGCTCTGGCTCGCATGTTTAGTATGGAGGGGCAACTTGAGGAACGACAGAGAATTGGCTGGAAACTTGTCTACAAGGATCATGAGGATGACATCCTACTTCTTGGTGATGACCCTTGGGAGGAATTTGTCAACTGTGTGAAGTGCATTAGGATCCTGTCGCCTCAGGAAGTGCAGCAGATTAGCTTGGATGGGGATCTGGGGAACAACATTCTCCCCAACCAGGCCTGCAGCAGCTCCGACGGCGGCAATGCCTGGAGAGCTCGCTGCGATCAGAACTCCGGTAACCCATCTACTGGTTCATATGACCAGTTTGAATGA
>Zm00001d015243_T001
ATGAAGCAGTCCCCGGCCAGCTCTGGTGTCACGGCCGCGCCCGTCGTCCCTGCCCCCGCGCCCGCGGCCGCCTCCACCGGCGCGGCGCCGCCATGCGAAGGGGAGCGGAAGGCGCCGGCGATCAACGCCGACCTGTGGTACGCCTGCGCGGGCCCGCTCGTGTCTCTGCCGCCGGTGGGCAGCCTCGTCGTCTACTTCCCGCAGGGCCACAGCGAGCAGGTTGCAGCTTCTATGCAAAAGGACATCGATGCACATGTGCCAAGCTACCCAAATCTTCCCTCAAAGCTGATATGTCTTCTTCACAGTGTTACTTTGCACGCTGACCCGGATACTGACGAGGTGTACGCGCAGATGACTCTTCAGCCAGTGAACACGTATGGGAAAGAGGCTTTACAGCTATCGGAGCTTGCACTGAAACATGCAAGGCCACAGATGGAGTTCTTCTGCAAGACGCTTACTGCAAGTGATACGAGTACACATGGAGGCTTCTCTGTGCCTCGTCGTGCTGCGGAGAAGATATTACCTCCACTGGACTTCGGTATGCAGCCTCCGGCTCAAGAACTTCAAGCCAGGGACATACATGACAATGTGTGGACATTTCGCCATATATTTCGAGGTCAGCCGAAAAGACACTTACTAACCACTGGGTGGAGTCTTTTTGTGGGCGGCAAGAGACTATTTGCTGGTGATTCTGTCATTTTTGTTAGGGCTAGCCCTACTGAGTTTGTTATCCCATTTGCCAAATTCCAGAAGGCACTGTATAGTAACCAAATATCTTTAGGAATGCGATTCCGGATGATGTTTGAGACCGAGGAATTAGGGATGAGAAGGTACATGGGTACAATAACTGGGATAACTGATCTAGATCCTGTAAGATGGAAAAACTCCCAGTGGCGCAACTTACAGGTTGGTTGGGATGAATCTGCCGCAGGGGAAAGGAGAAACAGAGTTTCAATGTGGGAGATTGAACCAATTGCTGCTCCTTTCTTCATATGCCCCCAGCCTTTCTTTGGCGTAAAGCGCCCTAGGCAAATAGATGACGAGTCATCAGAGATGGAAAACCTTTTCAAGAGGGCAATGCCTTGGCTTGGTGAGGAGATATGCATAAAGGACGCTCAGACCCATAACACCACAATGCCTGGTTTGAGCTTGGTTCAATGGATGAACATGAACAGGCCGCAGAGCTCCACATTAAATACAGGCATACAGTCAGAGTATCTGCGATCTCTAAGTAACCCTGCCATGCAAAACCTTGGTGCGGCTGAGCTCGCAAGGCAGCTATATGTCCAGAACCATCTCCTGCAACAAAACAGTGTACAGCTTAATGCTTCCAAGCTCCCTCAGCAAGTGCAACCTATAAATGAGCTTGCTAAGGGATCATTGTCTTGTAATCAACTTGACGTCATCATCAATCAACAAGAACTGAAGCAAGAAGTTGGCAATCAGCAGAGGCAACAGCAGCCCGTTAACCAAGCAATTCCTTTAAGTCAGGCTCAAACCAATCTTGTCCAGGCCCAGGTAATTATCCAGAATCAGATGCAACAGCAGCAGCAACAACAGCAGCAGTCTCCAACTAGGTGCCAGAAGGGAACCAGTGTGCAACAGCTGCTTCTTTCACAGCAACAGCAGGACCAGAATTTTCAGCTGCAGCAACAACAGCAGCTTTTACTTCAGCAACTGCAGCAGCAGAATCAGCAGCAGCAGCAACAACAGCAGAATCAGCAGCAGCTAAACAAGTTGCCAGCTCAACTTGTGAATCTGGCTGGTCAACAGGCTCAGTTGTCTGACCAGGAACTTCAGCTGCAGCTATTACAGAAACTACAGCAGCAGTCACTTGTATCACAGCCAACAGTTACACTCTCGCCGTTACAGGTAATACAGGAACAACAGAAGTTACTTTTGGACATGCAGCAGCTATCAAGCTCTCATTCACTTGCCCAGCAGCGGATCCTGCCTCAACAAGATAGCGATGTTTCGCTGCAAGCATCACAGGCGCCACCACCAATGAAGCAAGAACAGCAGAAGCCTTCACAGAAACAATTTGTGCTTGCAGATGTGTCAGATGTTGTCTATCCACAGATTTCATCAACCAACGTTTTGTCCAAAGCTGGAACCCAACTGATGACTCCAGGTGCTACACAATCTGTACTAACGGAGGAAATTCCTTCTTGCTCAACATCACCTTCTACAGCCACCGGAAATCATTTGGCATACCCAATCATTGGCAGGAACGAGCATTGCAAGGTCACCATTGAGAAAGTTCCTCAATCGTCTTCTCTGATGTCAATTCCAACAGCTGGTGAAGCTGTAACAACTCCAATAATGGCGAAGGAATTGTCAAAGTTGAACCATAATCTGAAGGAGAATGTAACCACATCAAAGTCACCCATTGTTGGGACTGGACATGAGAATCTTTTGAACATTGTACCGTCAACAGACAACCTGGAAACAGCTTCATCAGCAACTTCTTTATGGCCTACCCAAACAGATGGACTTTTGCATCAAGGTTTTCCTACTAACTTCAATCAACAACAAATGTTCAAAGATGCACTTCCAGATGTGGAAATTCAAGAAGTGGATCCGACTAACAATGCCTTCTTTGGGATCAACAGTGATGGTCCATTGGGCTTTCCTATGGAAACCGAAGGCTTGTTGGTAAGTGCAATTAATCCTGTGAAGTGTCAGCCTAATTTGTCAACTGACGTTGAGATCAATTACCGAATACAAAAGGATGCCCAACAAGAGATCTCAACCTCCATGGTTTCACAGTCATTCGGTCAGTCTGATATAGCTTTTAACTCAATTGATTCTGCAATCAACGATGGTGTCATGTTGAATAGAAATTCTTGCCCCCCTGCACCTCCGCAGAGAATGCGGACATTCACAAAGGTCTACAAGCGTGGAGCTGTAGGCCGATCCATTGACATAGGCAGGTTCTCCGGATATGAAGAATTGAAGCATGCTGTGGCCCGCATGTTTGGTATAGAGGGCCAACTTGAGGACCGACAGAGAATAGGATGGAAGTTAGTCTACACGGATCATGAGGATGACGTCCTACTTCTTGGTGACGACCCATGGGAGGAGTTTGTGAATTGTGTGAAGTGCATTAGGATCCTATCCCCCCAAGAAGTGCAGCAGATGAGCTTAGATGGTGATTTGGGGAACAATGTCCTCTCCAACCAGGCTTGCAGCAGCTCAGATGGTGGGAATGCCTGGAAGCCTCGCCGCGACCAGAACCCTGGTAACCCTTCCATCGGGTTCTACGACCAATTTGAGTGA
>Zm00001d016838_T001
ATGGCGGAGGCCGGCGTGGCACGCGGCTCAGGGAGTGCTGGCGATGCTTTGTTCAGGGAACTCTGGCATGCTTGTGCTGGGCCGTTGGTCACAGTGCCTCGCCAAGGCGAGCTGGTTTATTACTTCCCGCAGGGTCATATGGAACAGCTTGAAGCGTCTACAGATCAACAACTTGATCAGCACTTGCCTTTGTTTAATCTACCGCACAAGATCCTCTGCAAGGTGGTCAATGTAGAACTTAGAGCTGAAACTGATTCTGATGAAGTTTATGCTCAAATTATGCTGCAACCACAAACAGAGGTGAGTAGGTTCACGTATATAATTTCTTGTGGATCTCAATCCTCTCACTGCATTATTGTCCGTTTCTTTGTATGTTCACAAAGTGAGCCCACCAGCCCAGATCCTGAACCACCTGAGCCTGAAAGATGCAACATTCATTCCTTCTGCAAGACCTTGACTGCTTCAGATACAAGTACCCATGGTGGATTCTCTGTCCTCAGGAGGCATGCTGAAGAATGTTTGCCCCAACTGGACATGACTCAGAATCCACCGTGGCAAGAACTAGTGGCTAAAGATCTCCATGGAAATGAATGGCATTTCCGTCACATCTTTCGAGGGCAACCAAGGAGGCATCTACTTACAACAGGCTGGAGTGTTTTTGTTAGCTCAAAAAGATTGGTTGCGGGTGACGCGTTTATCTTCTTGAGAGGTGAGAACGGAGAGCTGCGAGTCGGGGTAAGGAGGCTCATGAGACAACTAAATAACATGCCGTCTTCGGTTATCTCAAGCCACAGCATGCATCTTGGAGTCCTAGCAACTGCATCTCATGCCATCTCCACTGGAACTCTCTTTTCTGTTTTCTACAAACCCAGAACAAGTAGATCTGAATTTGTCGTTAGTGTAAACAAGTACCTCGAAGCTAAGAATCACAAGATGTCTGTTGGTATGAGGTTTAAAATGAGATTTGAGGGTGATGAATCCCCTGAAAGAAGATTCAGTGGGACAATTATTGGTATGGGATGCATGCCAGCTAACTCAACATCTCCATGGGCTAACTCTGAATGGAGATCATTGAAGGTCCAATGGGACGAGCCTTCCGCTATTCTGCGTCCAGATAGAGTTTCACCATGGGAAGTAGAACCCCTTGATCGAACAAATCCACAGCCACCTCAACCTCCTTTACGGAATAAGCGAGCACGGCCTCCTGCTTCACCTTCGATTGCTCCAGAACTTGCTCCAGTTTTTGGTTTTTGGAAGTCCCCAGCTGAGCCTGCCCAAGCTTTCTCATTCTCAGGACTGCAGCGAACTCAGGAGCTATACCATTCAAGCCCCAGTTCAATGTTCTCATCGTCGTTGAATGTGGGATTCAATCCAAAGTACGAGGGTCCCACTCCAAACACCAACCATTTGTACTGGACAATGAGAGAGACAAGAACTGAATCCTACTCCGCTAGTATCAACAAAGCTCCAACTGAAAAGAAGCAAGAATCCACTACTTCTGGCTGCAGATTGTTCGGTATCGAGATAGGTTCTTCTGCAGTGTCACCCGTGGTTACTGTTGCTAGCGTCGGGCATGATCCTCCGCCACCTGCTCTCTCAGTAGACGCTGAATCTGACCAGCTGTCACAGCCGTCCCATGCCAACAAAGCAACGGATGCCCCAGCGGCAAGCAGCGATCGCTCTCCTAACGAGACAGAGAGCCGGCAAGCCAGGAGCTGCACCAAGGTAATCATGCAAGGGGTGGCGGTTGGCCGGGCGGTGGACTTGACGAGGCTAGATGGGTACGATGACCTCCGCCGCAAGTTGGAGGAGATGTTCGATATCCCGGGAGAGCTTTCCGCCAGCCTCAAGAAATGGAAGGTGATCTACACAGATGACGAGGACGATATGATGCTGGTCGGGGACGATCCATGGAGTGAATTTTGCAGGATGGTAAAAAGGATATACATTTATTCCTACGAGGAGGCCAAGTCTTTGACTCCCAAGGCGAAGCTGCCGGCCATCGGTGGTGACACCGGCGTCAAGCCGGACCCAAGCAAACTGCCACCAGAATCCGACGTGCCACAGAGCGACTCCGACAACAGTGCTCCCGTTGCTGCTGATAAGGACTGA
>Zm00001d017284_T001
ATGATCACATTTGCGGACCTGACGGAGCCGGCCGCCGCCGGCGCCGAGCGGTGCGTGGACCGGCAACTGTGGCTGGCGTGCGCGGGCAGCATGTGCACCGTGCCGCTTGTTGGCGCCAGCGTCTGCTACTTCCCGCAGGGGCACGCGGAGCACGCGCTCGGTCTCGACGGTGCGGCCGACCTCTCCGCGGCGCGCGTACCGGCGCTGGTCCCCTGCCGCGTCACGGCAGTGCGCTACATGGCTGATCCAGACACCGACGAGGTCTTCGCCAGGATCCGCCTCGTCCCGCTACGCGGCGGGGAGGCGCACGCGGGTGGCCTCGATGACGATGTGGCCGCGGCGGACGAGCAGGAGAAGCCGGCGTCGTTCGCCAAGACGCTGACACAGTCCGACGCCAACAACGGCGGCGGGTTCTCCGTGCCGAGGTACTGCGCGGAGACCATCTTCCCGCGGCTTGACTACGCCGCCGACCCGCCCGTGCAGAACGTCGTCGCCAAGGATGTGCACGGGACCGCCTGGAAGTTCCGCCACATCTACCGGGGCACGCCGCGCCGGCACCTGCTCACCACTGGGTGGAGCACGTTTGTCAACCAGAAGAAGCTCATCGCCGGGGACTCCATCGTGTTCCTCCGCGGTGACAGCGGGGACCTGCACGTCGGCATCCGGCGCGCAAAGCGTGGGTTCTGCGGCGCTGGTGGGGGCGGAGGCGACGAGGCCCCTACGCCCGGGTGGCATCATTACGCCGGCCTTATCCGAGGTAATGTGAGCCCTTGCGCGGCTGCCAAGGCACGGGGCAAGGTGCGACCAGAGGACGTGGCCGAGGCGGCGAGGCTGGCGGCTGCCGGGCAGTCGTTTGAGGTGGTGTACTACCCTCGCGCGAGCACGCCCGAGTTCTGCGTTCGCGCCGCCGCGGTCCGCGCGGCGATGAGGGTGCAGTGGTCCCCAGGGATGCGGTTCAAGATGGCGTTCGAGACCGAGGACTCCTCCAGGATCAGCTGGTTCATGGGCACCGTCGCCGGCGTCCAGGTCACCGACCCCATCCGCTGGCCGCAGTCGCCGTGGCGCCTTCTTCAGGTGACCTGGGACGAGCCGGACCTTCTGCAGAACGTGAAGCGGGTGAGCCCATGGCTGGTCGAGCTGGTGTCAAGCATGCCGGCCATCCACCTCGCCTCCTTCTCGCCGCCGCGGAAGAAGCCCCGCATCCCAGCGTACCCCGAGTTCCCCTTCGAAGGGCAGCTCCTTAACCCGGCGTTCCCGCCCAGCCCACTGCCACACGGCCAGCAACACCACCACAATTTCCTTCACGCCCACCCACCGTCGTTCTTCCCGTTCCCGGACGGCAGTGCTCCTGCAGCCATACAGGGAGCCAGGCATGCGCAATTTGTTCCATCTTTATCAGATCTCCACCTTATCCACCTGCAGTCGAGCCTGCTGTACCCTGGGCTCCGCCGTCCCGACCATGTCGGTCCGACGATCCCTATCCCGTCGGGAATCAGCACCGACCTGACCATCGGAGGCGCACCGGCGCGCGACGGCGTCCCGTGTGCCCTGTCCGTCGGTGCCAGCAAGCAGAACCCCGACGCCGTCAAGCCGGCGGGGCTGGTGCTCTTCGGACGGACCATACTAACCGAGCATCAGATGAGCCTCAGCAGCTCCGGCGGCGCCACCTCCCCAGCGGCGACTGGTAACAGCTCTCTGTGCTGGACCGCCGAGAAGGGCCCCAATGTCTCGGAGGGCTCGGGCTCGGGCTCGGGCTCCGGCGTCATCCAGAACAGCCCGACCGGCAAGAACACGTCGTCGGAGAGGCTGCCGTGGTTCGGGGACGGCAGCAGCCAGCAGGCCTCCGAGCCCGGTCTTGAGCCCGGACAATGCAAGGTGTTCGTCGAGTCCGACACGGTCGGCCGCAACCTCGACCTGTCGGCGCTGGGCTCGTTCGACGAGCTGTACGGCCGCCTGTCCGAGATGTTCGGCGTCGAGGGCGCGGAGATGCGGAGCCGCGTGCTGTACCGCGGCGCCACCGGTGAAGTGAGGCACGCCGGCGACGAGCCCTTCAGCGATTTCGTCAAGTCGGCACGGAGGATCACGATATTAACCGATGCTGGGAGCGACAACCTAGGAAGCTAA
>Zm00001d023659_T003
ATGAACATGGAGCTGAAGGCTGAGCCGGATACTGATGAGGTGTACGCCCAACTCACCCTGCTCCCTGATAAGAAGCAAGATGAGAATACATCTGCAAGAGTGGAGAATGAGGAGGCAGAGGAGGAGGTGGTGCCTCATGTGCCACCAGCCACAAGTGAGGGGCTTCGCATCCATTCCTTCTGCAAGACATTGACTGCCTCAGACACAAGCACACATGGTGGTTTCTCAGTGTTGCGCCGGCATGCAGATGAGTGCCTCCCACCACTGGATATGAGTCAACATCCCCCAAATCAAGAATTGGTGGCCAAGGACCTGCATGGGGTTGAGTGGCGGTTCCGTCACATCTTTCGAGGTCAGCCACGGAGACACCTCCTTCAGAGTGGTTGGAGTGTTTTTGTTAGTGCCAAGCGTCTTGTTGCGGGGGATGCATTCATATTTCTCAGAGGTGAGAATGGGGAGTTACGTGTTGGAGTTCGGCGTGCACTGAGGCACCAAACCACTATCCCATCTTCAGTCATATCAAGCCACAGTATGCATCTTGGTGTTCTTGCAACAGCATGGCATGCAGTGAACACTGGGAGTATGTTCACTGTCTACTACAAACCAAGGACTAGTCCAGCTGAATTTGTGGTTTCACGAGCTAGGTACTGTGAATCACTGAAACGAAATTATTCAATAGGGATGAGGTTTAGGATGAGATTTGAAGGTGAAGAAGCGGCAGAGCAAAGATTCACTGGCACAATAGTTGGAATATGTGTTTCTGATCCATCTGGCTGGGCTGACTCGAAATGGCGTTCCCTTAAGGTGAGATGGGATGAAGCTTCTTCTGTTCCTCGTCCTGAAAGAGTTTCTCCTTGGCAAATAGAACCTGCTGTTAGCCCATCTCCTGTGAACCCTCTTCCAGTCAGATTCAAGAGGTCTCGTTCAAGTGTTAACGCCTCACCATCTGATGTGTCTACTGTAAACAGAGAAGTTGCTTCTAAAGTCATGGTAGAGTCGCAACAGAATAATCTCCCAAGGGCCTTGCACAATCAAGGAAGGACACAATTGACAGGTCGATACCGTGATAGCACTGATGTGAAGACTGCTCAGGATCTTACCATGTGGTCTTCAGGAACTGAGCAACAGAGAAACAATATTGCTGCCCAGACAAAACGATGTCTGGAGGGTTGGACGCAATCTAGAACTCCAGAAGGTTACAATCAACTGTTCTCGGCATTTCAACCACTGAAGGATGCACATAATCCACTTCGTCCTTTTCCTAATAAAATATCTGGGACTCGCTCAAGTACCTGGGTCACAGCCGATGCCCGTTATCCAGCTCAACAAGCCAATCACAACATGTTACATGGCACATTGTCTTTTATGCCTCATAGCAGTGGTTTTAGGATGATTCAACAGAATAATCTAGTGACACCTGAAGCTGCAAATTTTACTGGGAAATCAGCTTTCACTTCACTTCAGGGCCATGTCACTGATCAGTGCTCCACAGGCTGGTTTGGATCTATTGAGTCAAATTCCCACACAGACCATGCATCGTCAAGTTTGATCAGGTCCCAGCCTTTGGTTATTGGAAATGATGTTCAGAAAACCAAAGGCACTTCATTCAAACTATTTGGGATTCCTCTTGGCAGTCCAGAAAAATCTGAACCTCTGGTATCCCCACCAAGTGTCGCATATGACGGGAAACTTCAAACTTCTCCAACAGACAACAATGAGCCTTGTTCAGAAGCTACCCAGAATATCCAGAACAAAGTGCAAAGTAGTTCAACCAGAAGCTGCAAGAAGGTCCATAAGCAAGGCAGCGCCCTCGGGAGATCGATCGATCTAACAAAGTTCGCTTGCTACGATGAGCTGATTGCCGAACTAGACCAGATGTTTGACTTCGATGGTGAGCTGAAGAGTCCTTGCAGGAACTGGTTGGTCGTCTACACTGACAACGAAGGCGACATGATGCTGGTCGGCGACGACCCCTGGAATGAGTTCTGTGACATGGTCCACAAGATCTTCATCTACACAAGGGAGGAAGTGGAGAGGATGAACCCAGGCGCCCTAAACGCGAGGCTCGAAGACTGCCTGTCTGACTCGCTGGGAAGAGGGCTGGCTTCCAAAGAGCCCCGGAGCGGCCCCTCGACTTCGGCTGTCGATTCTGAGAACCGCGCTAACTTGTCCAGTCAGTGA
>Zm00001d025871_T001
ATGCCCGCATCGCAGGCCGGTGCCGGTGCCGGCGCCGAGCCCGAGACCAAGGGATCCGTGCACCCGCAACTGTGGTACGCGTGCGCGGGCCCCACGTGCACCGTGCCGCCCGTCGGCACCGCGGTGTACTACTTCCCTCAGGGCCACGCCGAGCATGCCGGCGCCGCCGCCGACGCCAACCTGCACGCCCCGCCTTTCGTGCCGTGCCGCGTCGCGGGCGTCAGGTTCATGGCTGAGCTCGACACCGACGAAATCTTCGTCAAAATACGCCTCGACCCGCTCCGCTCCGGGGAGCCGCTGACGGACGTGGGCGAGGCCCAGGTGGTGAACGACGAGGCCGGCCAGCGGCAGCCCACCAGGCCGGTGATTTCTTCCGCCAAGACGCTGACCAAGTCCGACTCCTACAGCGGCGGCAGCCTCTCCGTGCGGCGCACCTGCGCGGAAACCATCTTCCCCAAGCTGGACAAGAGCATCAAACGGCCCCAGCAGTTGGTCTCCGCCAGGGACGTGCACGGCGTCGAGTGGACGTTCCGCCACGTCTACCGGGGCACCCCGGAGCGGAACCTGCTCACCACAGGGTGGAGCGACTTCGTCAACAGCAAGAAGATCGTCATCGGCGATTCCGTCGTGTTCCTGCGCGAAGAGGACGGCACCATCCACATCGGCCTGCGGCGCGCCGAGCGCGCGTCCCGGCGGAACGCCTACGGGCGCCAGCTGGTGCGGGGCAACGCGAGCGGCACGGGCGCCGCCGCGGACGGCGTCCTCCGAGCGGAGGACGTGGTCGCGGCGGCGGTGACGCTGGCCGCCGCCGGGAACCCGTTCGAGGTGGTGCACTACCCGCGGGCCACAGCGCCGGCGTTCTGCGTGCGCGTGGCCACGGTCATTGAGGCCTTGCAGGTCTCCTGGTGCCCCGGCTTGCGGTTCAAGATGGCGTTCGAGGCAAAGGACCTGTCCCGGATCAGCTGGTTCATGGGCACCGTCGCCGGTGTCGGGCCGGCCGATCCCGCCCGGTGGCCGCTGTCGCCCTGGCGATTCCTTCAGGTGACCTGGGACGAGCCTGAGCTCGTGCGGAACATGAACCGCCTGAGCCCGTGGCAGGTCGAGCTGGTGGCGACCATGCCCAACCTGCCGCACTTCGCGGCGCCGCCTACGCCGACGCCGCCGCGCAAGAAGCCGCGCATGCCGACGTACAAGGAGTACCAATCGCAGGGCCGGCAACTTTTCGATCCCGTTTTCCCGCTCAACAACCCACTCCCACTGCCACACCCACACCACCACCCTGCACCAACCCACGACTGGAACTGCCACGGTTTCGTCCATTGTTCCTCCTTCCCCTTCCCGGACAGCATCGCTCCTGCTGCTGCCGCAGGCATACAGGGAGCCAGGCATGCGAACTTCGCTCAGTTCTTATTTTCGGATCACCTCCTCAGCAACCTGCGGCGAAGCCTGGTGTTGGGTGGCATCCGCCAGTACCCAGGCGATCACCATGCCGCTCCCGCGCCACGGATCCCCATCCCCACCGACGACGTGAAGACTGGCAGCGAAACGCCCCGCTCTCCATCACATGCGACCAAGAAGCGCGACGGAGTCAAGCCGCCGGGGATAAGGCTCTTCGGGCAGGAGATACTGACCGAGGAGCAGATGAAAGGCAGCCACGATGGGAAAGCGACCAACAACACCTCTGGTCGCTCTGGAGCGCCCGAGTTCGGGCTGGAGCCCGGGCAGTGA
>Zm00001d026540_T001
ATGATGGCCTCCTCGCAGGAGAAGGCCACGTCGGGTGTCCTGAGGAACGCGGCGGCGCTGCTCGACGAAATGCAGCTCATGGGAGAAACGCAGGGTGCGAAGAAGGTGATCAACTCCGAGCTGTGGCACGCGTGCGCGGGGCCGCTAGTGTGCTTGCCGCAGCGCGGGAGCCTCGTCTACTACTTCCCGCAGGGCCACAGCGAGCAGGTTGCTGCTACCACTAAAAAGATACCGAATTCTCGCATCCCAAACTACCCGAGTCTCCCGCCGCAGCTGCTATGCCAAGTCCACAACATCACTTTGCATGCCGACAAAGAAACTGATGAGATTTACTGCCAGATGACCCTGCAACCGTTACACTCGGAAACAGACGTCTTCCCAATTCCAACTCTTGGTGCCTATACCAAAAGCAAGCACCCCACCGAATACTTCTGCAAAAATCTAACCGCGAGCGATACAAGTACGCATGGCGGCTTCTCAGTGCCGCGGAGAGCTGCCGAGAAGCTGTTTCCGCAACTGGTACGAGCTTCAGCTCAGACCCGTGTTTTCAACCCCCAGGATTACTCAATGCAGCCTCCTAATCAGGAGCTTATCGTCCGAGATTTGCATGATAACATGTGGACGTTCCGTCACATTTATCGTGGCCAGCCAAAGCGACATCTTCTAACAACTGGATGGAGCCTTTTTGTTGGGGCGAAACGGCTTAAAGCTGGAGACTCTGTCTTATTTATCAGGGATGAGAAGTCACAGCTCCTTGTCGGTGTTAGGAGGGCCACCCGACAACAACCGGCTTTGTCTTCATCCGTCCTGTCTACTGACAGTATGCACATAGGCGTTCTTGCTGCAGCAGCTCATGCAGCATCAAGTGGTGGCTCATTTACTATTTACTACAATCCTCGGACAAGCCCGTCGCCATTTGTGATTCCTCTTGCGAGGTACAATAAGGCCACGTATCTGCAACCATCTGTTGGAATGAGGTTCGCGATGATGTTTGAGACGGAGGAGTCAAGCAAGCGCAGATGCACAGGTGCTATTGTGGGAATTAGCGACTATGACCCGATGCGATGGCCAAACTCAAAGTGGCGCAACTTGCAGGTAGAATGGGATGAACATGGGTATGGAGAAAGACCTGAAAGAGTTAGCATATGGGATATCGAAACTCCAGAGAACATGGTTTTCTCTTCTCCTTTGAATTCGAAGCGGCAATGTCTTCCTAGCTATGGAGTTCCGGGCCTACAAATTGGATCTGTAAATATGTCATCAATTCCAAGGGCACAAGGAAATCCTATCGGTAACTTGCAGCACATGCCAGGGATGGGCTCAGAATTGGCTCTACTGCTTCTCAATCAATCTGGCCAGAACATCGGAAGTCCAATCGCTTGTCAACAATCATCATTTTCCAGCATTATTCAAAATGCTAAGCACAGCTATTTCCCTCCAAAGACGTTTGGTGCTTCCACTGCTTCAATGAAGCAAGAAAGCATGCCTTCGACTGAAGCCCAGCCACAGTTGAATGCTCTTGGTATTCAGAGAAGTGATCGAGTAAGCTGTGAAGTTCAGACAGCTAGTGATTCAAATCCTGCACAGGAGATGAGTGTTAAACCAAGAGCACCAAGAAGCACAGATTCACACTCAAGCCAAAGCATTTCGGATCAAAACAGCAAGGGTGAGCCTAGAACAAAAACTCGAAGGAGCAAGAAGAGCTCGTATCAGAAAACCATTTCAGATAAATCTGAGCTTTGTTCAGTACCTTCTCAGATTTGTGACGACAAGAAGCATGGTTCAGAGCCAAGACTGGCTGACTGTGAAGCCGAACAAGCTACCTGTGGGAATAACGAAGAATCATCTGGAGCACTTACACATGGTGATTTTGCTGGAGAGCTCCAAGTTCAGCAGCAGGTTGAACAGCATGAACTACTTGCGCCACCAAAGATAGAATCATCAAAGTCACCTGATGGAGGGAAGTCCGTCAGTTCGTTCCCAAACCAAGGGTGTATCCCACAGTTCTTTGAGGGTCTGGACTGGATGATTCCACCTTCCTATTACCAAGACTCCAATGGCATCCAATCAGTTACCGCGTCGGATAACATTTTTAATCCATCTGAAGGTATACCTTCCACCATGAACGCTGATGCCTTGGATGCGTTTCAAACATCTTGCCTTTCTGAGTGCTTTCCTAGCTCCATTCAAGAGTTCATCGGCAGTCCGGATATAAACACACTGGCATTTATGTCGCCTGAGATGCAACAATTGGATGCCGGCAGCAACTTGCCGAGCACATCCAACTCCTATGTGCAGATGAGTTTCTCGGAGGAGAGCCACAGCGCATCCTTGAGTGGCCTTCACATGGAAGCCATCCATATAAACAGCTCGTCATGCTCTCAGCCACTGGCGACGGGGAGCTTCGATGCAGGGGCGTTCCCGAAACTGTCAAACATAAGAGAATGCCAACCCTTGCCTCTGCAAGAGATCCACACCAGTTCCATGGGAACACCTTCATGCAGTATGGACGCGGCGGCAGAGTACGGCACGGATAGAAGTGCGAAGCAAATGAAACCACCGGTCCGGACCTATACAAAGGTTCAGAAGTTAGGATCAGTTGGAAGATGTATTGACGTTACACGGTTCAGAGATTACCATGAGTTGAGGTCAGCCATTGCGTGCATGTTTGGACTCCAGGGGAAGCTGGAACATCCTGGCAGTTCAGATTGGAAGCTTGTTTATGTCGACTACGAGAACGATGTTCTTCTCGTTGGAGACGATCCATGGGAGGAGTTCATCAACTGTGTGAGATGCATCCGGATCTTATCACCTTCGGAAGTACAGCAGATGAGCGAGAACGGCGTGCATGTCTTGAACGACTGCATCCAAATAGCTTAG
>Zm00001d026590_T001
ATGCATGCGGATGTGGAGACGGATGAAGTGTACGCGCAGATGACGCTGCAGCCGCTCAACCCACAAGAGCAGAACGACCCGTACCTGCCTGCGGAGATGGGAATCATGAGCAAGCAGCCGACGAACTACTTCTGCAAGACGCTGACTGCGAGCGACACCAGCACGCACGGCGGGTTCTCTGTGCCCCGTCGCGCGGCCGAGCGTGTCTTCCCCCCACTGGATTTCACACAGCAGCCTCCAGCACAGGAGCTTATTGCACGGGATATTCATGATGTCGAGTGGAAGTTCAGGCATATCTTCCGAGGCCAGCCCAAAAGACACCTGCTGACTACTGGCTGGAGTGTGTTTGTCAGTGCTAAGAGACTTGTTGCTGGAGATTCTGTGCTATTCATATGGAATGAGAAAAACCAGCTTCTGCTTGGAATCAGACGCGCCAGCCGTCCACAGACTGTGATGCCCTCTTCTGTTCTTTCGAGTGACAGCATGCACATTGGGCTCCTTGCAGCAGCAGCTCATGCTGCTGCAACAAACAGCCGTTTCACAATTTTCTTTAATCCTAGGGCAAGTCCATCAGAATTTGTTATACCCCTTTCGAAATACATCAAGGCAGTTTTTCACACGCGGATATCAGTTGGGATGCGATTCAGGATGTTGTTTGAGACAGAGGAATCTAGTGTCCGCAGGTACATGGGGACAATAACTGAAGTGAGTGATGCTGACCCAGTGCGTTGGCCTAGTTCCTATTGGAGATCAGTGAAGGTTGGCTGGGATGAATCAACAGCAGGAGAAAGGCCACCTAGAGTTTCTCTGTGGGAAATTGAGCCACTGACAACCTTTCCTATGTATCCATCCCTCTTCCCACTGCGAGTTAAGCATCCATGGTATTCAGGAGTTGCTGCTCTTCATGATGACAGCAATGCTTTGATGTGGCTGAGAGGAGTTGCTGGTGAAGGGGGCTTTCAGTCTTTAAACTTCCAGTCACCTGGTGTAGGTTCCTGGGGACAACAGAGACTCCATCCATCCTTACTTAGCAATGACCATGATCAGTATCAAGCAGTGGTTGCTGCCGCAGCTGCTTCCCAGTCGGATGGTTATCTGAAGCAGCAATTCCTACACCTTCAACAACCTATGCAGTCCCCACAGGAACAGTGCAATCTCAATCCGCTGTTGCAGCAGCAAATACTACAGCAAGGGAGCCAACAGCAGATGGTTAGTCCTGATGCTCAAAATATCCAGTCCGTGCTCAACCCAAATGCTATTCAGCAGCAGCTCCAACAATTCCAGCAGATGCAGCATGCTCATAATGACCAGAAGCAGAAGATTCAACCAGATCAGCCGTACCAAGTTCCTAGCAGTGCGGTTCTCTCGAGTCCAACATCATTACCAAGCCATTTGCGGGAAAAATTTGGCTTTTCTGATCCTAATGTCAACTCTTCCAGCTTCATCAGCTCTAGCAGCAACGAGAATATGCTGGAATCAAACTTCCTTCAGGGAAGCTCAAAATCTGTGGATTTGTCTAGATTCAACCAACCTGTAGTTAGCGAGCAGCAGCAGCAACAGGCATGGAAGCAAAAGTTTATTTGCTCACAATCGATGTCTTTTGGGGGCTCGGTTTCACTTAACTCACCCACTACCAAAGATGGTCCTGTTGACAACAAAATTGGTCGTGATGTGCAGAACCAGACCCTTTTTAGCCCTCAAGTTGACTCTTCCTCCCTACTGTACAATATGGTACCTAATTTGACCTCAAATGTTGCGGATAATAATATATCAACGATTCCCTCTGGATCAACATATCTGCAAAGTCCAATGTATGGTTGTCTGGATGACTCTTCTGGTTTATTGCAAAATACAGGAGAGAATGATCCGACAACTAGAACATTCGTTAAGGTTTACAAGTCAGGATCGGTGGGGAGATCCTTGGACATCACCCGGTTCTCTAATTATGCTGAACTTCGAGAGGAACTGGGTCAGATGTTCGGCATTAAGGGTCAGTTGGATGACCCTGATAGATCAGGCTGGCAGCTTGTATTTGTCGACAGGGAGAACGATGTGCTTCTCCTTGGAGACGACCCGTGGGAGTCATTTGTGAATAGTGTATGGTACATCAAAATACTTTCACCTGAGGATGTGCATAAGATGGGAAAGCCAGGAAACGATCCACGCTACCTATCTTAA
>Zm00001d026687_T001
ATGGAGCCGCAGCCACCGCTCCCCCTCGCCAACGGCCACGGCAACAGCATCGTCGACCGCGACGTCTGGCTGGCCTGCGCCGCCCCGCTCTCCCGCCTCCCCACCGTCGGCGACGATGTCTACTACTTTCCCGATGGCCACGCCGAGCAGTGCCCCGCGCACCTGCCAGCGCCGCTCCCCGCGCCGCACTTCTTCCCCTGCACCGTCACCGACATCAGCCTCGGCGCGGACGACAAGACCGACGAGGTGTTCGCCAAAATCTCCCTCAGGCCAGGCCTCGCCGCCGCTTCTCGTCCGGACCCCGGCAGCAGCAACAGCCCGCCGCGGGAGCCCCTCAGCTACTCCATCAAGGAGCTCTCGCAGAGCGACGCCAACGGCGGTGGATCCTTCTGCGTCCCGCGCTACTGCGGGGACCACGTATGGCCCAAGGTCGACTTCGAGGCCGACCCGCCCATGCAGAACCTCGTCATGCACGACACCACGGGCAAACAGTGGGAGTTCCGCCACGTCTACCGCGCCAAGCAGCCCCGACACGTGCTCACCACCGGCTGGAGCAAGTTCGTCAACGCCAAGCTGCTCGTCGCGGGGGACATCATCGTCTTCATGCGCCGCCCCAACGGCGACCTCATCGTCGGCCTGCGCCGCATGCCCAGGTACGCGGGCACCTTGCACCGCCCGGGGACCGGGGGCGACGCCCAAGACCCGGATCAGCCGCCCCCGCCCCCGCCCCGCAACGCGCTCGCGCGGGTGCCGCCCAAGGACGTCATGGAGGCCGCGCGCCTCGCCGCCGAGGGCAGGCCCTTCACGGTCACCTACTACCCGAGGAAGGCCGCCGGAGAGTTCGTCGTCCCGCGCAACGAGGTGGAAGGCGTGCTCGACACCCTCTGGGAGCCAGGCTCGCACGTACTCATGCAGTTCGCGGAGGCCGAGGACACACGGCGCACCATGTGGGCCGACGGCCACGTCAAGGCGATCCACCAGAAAATCTGGCGGGCGCTCGAGATCGACTGGGATGTTGCCTCCTCTGCAATTTCAGCACAACTGGGCAGATTTGTGAATGCTTGGCAAGTCCAGCGTATTGCCTACCCTTCTATTTGCGGCGGCCTTGGAGATTTATGTTACCCACTGCCACTGATGGAGTCGGAAAGCCAGGTCATGGCCATGATATTGGAGCAGATGCCACCGCGTACAAGTGCTTCTCCTCCCAACAACCCGCCGCGTCCAGGTCCAGGCCAAAAAGTGAACACCATAATGCTCTTCGGCGCCACAATCCACGTTGTGCAGAGTGATACCGACGATGATGGTTATGAACAGCTGAATCGAGATCCTCCTCCTAATGCTGCTGGTGGTGGTGATGATATGGATCATGACAGTGCTGAAAATATATAA
>Zm00001d029481_T002
ATGCCCTCTTCTGTTCTTTCGAGTGACAGCATGCACATCGGACTCCTTGCAGCAGCAGCTCATGCTGCTGCAACAAATAGCCGCTTCACAATTTTCTTTAATCCTAAGGCAAGTAAAACAGAATTTGTTATACCCCTTTCGAAATACATCAAGGCTGTTTTTCACACGCGGATATCAGTTGGGATGCGATTCAGGATGTTGTTTGAGACTGAGGAATCAAGTGTCCGCAGTCATGTTGACGAGGGTGATCAGGGGGTAAATGCCACACAATTGCTGCATAACGAACCTGTACTTGTTACTGTAAGTGGTGATGGCAGTGTTGGAATGTGGGACGTTACTTTAGGTCAACCTTGTGTCAGACATATCGTTGCCCATACTCGACGTGCTAATGCGGTTGTTGTGGCCCTTAATGACAAATACCTCTGCACAGGAGGAAGCGACCAGAAAGTTGTGAGTTGCTTATTTGTCCTTTTAGTTTCTTATGTGGCTTATGTTATGTCGTACTGGAAAAGGTTTTATATCATAACAGAAGTGGGCGTACACATCTTAATTGGCATCTTTCACATCCTCTCCAAGGAAATGATTGATATGCTGCCAGAAATCATAGAATTGTTCCGC
>Zm00001d030801_T001
ATGGCGACGCAGCAACCGCTTCCCCCCGCCGACGGCGTCGGCGATAACACCGTCGACCGCGACGTCTGGCTGGCCTGCGCCGCACCGTTTTCCCGCATCCCCACCGTCGGCGACGAGGTCTACTACTTCCCCGACGGCCACATCGAGCAGCACCAGCACCTGTCCGCGGCGCCGCTCCCTGCGCAGGACCGCTTCCACTGCACCGTCACCGATGTGAGCCTCGGCGTGGACGACAAGACGGACGAGGTGTTCGCCAAAATCTCCCTCAGACCACGGCCAGGCCGCGCCGCCGCTCCTCCTCCGGGCCCCGGCGGCAGCAGCAACAGCCCCGCGCCCGCCCCCGGCCCGCCACAGAAGCTCAGATACTTCACTAAGGATCTCTCGCAAACCGACGTCTACGCAAAGTTCCGCATCCCGCTGGAGAACGAGCACGTCTTACCCATACCCAAGGTCGAAACGGACGGTGCCGACCAGCAGCGCGTGCAGCGCCAGGACGTCGTCATGCGCGACACCAGGGGCAAATCGTGGAGGTTCTCCGAAACCTACCGCGTCAATCCGAGCAAGGAACACTCGCTCGGAACCGGGTGGTTGGATTTCGCCAAGGCCAAGCGGCTCGCCGCGGGGGACAAGATCGTCTTCATGCGCCGCCCCAACGGCGACCTCATCGTCGGCGTGCGGCGCCTCCACGTGCCCAGGTACCGGCCGTTCGACTTCCAAGGCCCGGCCCAGGACGTCATGGAGGCCGTACGCCTCGCCGCCGCGGGAAGGCCCTTCACAGTCACCTACTTCCCGAGACAGGCCGCCGTGGAGTTCATCGTCCCGCGCAGCGAGGTGGATGACGCGCTCGCCACCAGCTGGGAACCAGGCGCAGTGGTGCGCATGGAGGTGATGGAGGACGAGAACAGGCAGCACACCGTGTGGGTCCACGGCCGCGTCAATGCGATCCGCCAAAACATCTGGCGAATGCTCGAGATCATCTGGGGTGTTGATCCTCCTCTTGCAACGACGAGATCTGTGAATGCTTGGCAAGTTGCGTCCCTTCCTCCTCTTGCAACGACTGGGAGGAGTGTGATCCGGTCGGAATCAGAAAGCCAGGCCCAGAGCCCTTCTTCTTCTACTCGAGCCAGCAGGCACACCGACAGTGGCCCTTCTGCTACACCCTTTTCTGCAACGCCACCGCGTACAATAAGCATCCCCAGTGCTTCTCCCCCCAACAACCCAGTGAGCTTGTCTCCACTCCAGAACGTGAAGACCATAAAGCTCTTTGGCGAAACAATCTCTGTTGATGGTGGTGGTGGTGGTGGTTCTGAACAAGTGAATCGAGCTCCTCCCTCCTCCTAA
>Zm00001d030803_T001
ATGGCGACGCAGCAACCGCTTCCCCCCGCCGACTGCGTCGGCGATAACACCGTCGACCGCGACGTCTGGCTGGCCTGCGCCGCACCGTTTTCCCGCATCCCCACCGTCGGCGACGAGGTCGACTACTTCCCCGACGGCCACATCGAGCAGCACCTGTCCGCGGCGCCGCAGCCGCTCCCTGCGCAGCACCGCTTCCACTGCACCGTCACCGACGTGAGCCTCGGCGTGGACGACAAGACGGACGAGGTGTTCGCCAAAATCTCCCTCAGACCACGGCCAGGCCGCGCCGCCGCTCCTCCTCCGGGCCCCGGCGGCAGCAGCAACAGCCCCGCCCCCAGCCCCCCACAGAAGCTCAGATACTTCACTAAGGAGCTCTCGCAAACCGACGTCTACGCAAGGTTCCGCATCCCGCTGGACAACGAGCACGTCTTACCCATACCCATGGTCGACACGGACGGCGTGCAGCGCCAGGACGTCGTCATGCGCGACACCAGTGGCAAATCGTGGAGGTTCTCCAAAACCTACAGCGTCAATCCGAGCAAGCAACACTCGCTCACCACCGGGTGGTTGGATTTCGCCAAGGCCAAGCGGCTCGCCGCGGGGGACAAGATCGTCTTCATGCGCCGCCCCAACGGCGACCTCATCGTCGGCGTGCGGCGCCTCGACGTGCCCAGGTACCCGCTGTTCGACTTCCAAGGCCCGGACCCGGATCAGCCGGCCCAGGACGTCATGGAGGCCGTACGCCTCGCCGCCGCGGGCAGGCCCTTCACAGTCACCTACTTCCCGAGACAGGCCGCCGTGGAGTTCATCGTCCCGCGCAGCGAGGTGGATGACGCGCTCGCCACCAGCTGGGAACCAGGTGCGCTGGTGCGCATGGAGGTTATGGAGGACGAGAACAGGCAGTACACCATGTGGGTCGTCGGCCGCGTCGAGGCGATCCGCCAAAACATCTGGCGAATGCTCGAGGTTTTGAAATTATCGTCTCGTCTTCCTTCCATTGGCCTGATGACCTTCACGCCTTGA
>Zm00001d031064_T001
ATGGTGGATTCTCTGTTCCGCGCCGAGCAGCTGAGAAAGTCTTCCCTCCATTGGATTTTTCACAACAGCCTCCAGTGCAAGAGCTGGTTGCAAGAGATCTGCATGATAATGAATGGAAATTTCGTCATATTTTTCGTGATCGCAGGAGATTTACAATTGAGATGGATATCTCCTGCGGCTTACAAAGATATTTATAGAGGTCAGCCAAAAAGGCATCTACTGACGACTGGTTGGAGTGTTTTTGTAAGCGCGAAAAGACTAGTAGCAGGGGATTCTATCATATTTATCTGGAATGATAATAACCAGCTTCTCTTGGGAATTCGCCGTGCAAGTCGTCCACAGACTGTAATGCCCTCTTCTGTGCTATCAAGCGATAGCATGCACATTGGTCTTCTTGCTGCAGCAGCTCATGCTGCAGCCACAAACAGTCGTTTCACTATTTTCTACAACCCTCGGGCTAGCCCTTCTGAGTTTGTCATTCCACTGGCTAAGTATGTGAAAGCTGTTTACCACACGCGCGTATCTGTTGGAATGCGGTTTCGGATGCTTTTTGAGACAGAGGAATCAAGTGTCAGAAGATACATGGGTACAATCACAGGCATAAGTGATCTGGACTCAGAGCGCTGGCCAAACTCGCACTGGCGTTCTGTGAAGGTTGGTTGGGATGAGTCTACAGCTGGTGATAAACAGCCAAGAGTTTCACTCTGGGAGATTGAGCCACTGACAACCTTTCCGATGTACCCAACTGCTTTTCCATTAAGGCTAAAGCGTCCGTGGGCTTCAGGACTACCTATGTTCAATGGTGGGAGGAGCGACGAGTTCGCTCGTTATTCTTCTCTCATGTGGCTTCGAGATGGAAACCGAGGGGCTCAGTCACTGAACTTCCAGGGACTTGGAGCATCACCATGGCTTCAGCCAAGAATAGATTATCCATTGTTGAGTCTGAAGCCAGATACTTACCAGCAGATGGCTGCCGCCGCACTAGAAGAAATTAGAGCTGGGGATCATTTGAAGCAGGCATCTTCTCTCCTGCCAGTTCAGCAGACTCAAACTTTGAATGGTGGATTAGATCATTTGTATGGAAATCCTGTTCTACAGCAGATGCAGTTCCAATCTCAGCAGTCAACACTGCAAGCTGTGCAGCAAGGTTATGGTCAGAATGCAAACGACTCTGGGTATGTTCAAAATCAACTGCAGCAGCTGCAGCTGCAAAAGCAGCAGGAGCCACCACCACCACAGCAGCAGCAGCAGACACAAGTCCTTCAGCGACAAGCACATCAGGAAATGCAACAGCACCTCTCAGCTAGTTGTCATGATATTGCTAATGTAGCTTCTGGTGTGTCCATGTCTGGATCTGCTTGTCAATCACAATCTTCTCTGCTTTCTGGGTCATCGTTCTACCAACAGAACATCTTTGATGGAAATGGTGGTCCAGATCTGCATCTGCACAACAGTTTCCACAACTTTTCAAGCCAAGAGTCCTCCAACCTTCTTAACCTCCCAAGAAGTGGCCAATTAATGGCATCAGAGGGATGGCCTTCAAAGAGGTTGGCTGTGGAATCTCTTGCTGGTCATGAGATCCAACCTCTGCAGCACAAGCTTGAGAAAGTTAGTCACCAGAGTACTGTGTCTCACTGTTCTGGCACCTTGCCGCCACTATCAGCAAGAGACGGTTCTAGTGCCCAGGCTTGTGGTACAAATGTTCAGAGTCACCTGCTTCCATCATCATTTGCAATCCATGATGGATTGTCAACCATCAGGAGTGGTGGTGTTGGCAGTGGAACTGATGCGATAACCATAGCTTCGTTGAGATATAGTGATGCGAATTTGCTACCTGAAAACTCCATAGCAACTTCCAGTTGTTTGGGTGAATCAGGAACCTTCAATTCTCTTGACGATGTTTGTGGTGTAAACCCATCACAAGGTGGAACCTTTGTGAAGGTTTACAAATCAGGGTCCCTCGGGAGATCGCTCGACATCACCAGATTCGGCAGCTACTACGAGTTGCGTGTCGAGCTCGAGCGGTTATTTGGTCTCGAAGGCCAACTGGAGGACCCTGCAAGATCAGGCTGGCAGCTTGTATTCGTCGACCGGGAAAACGATGTTCTTCTCCTCGGCGACGACCCGTGGCAGGAGTTTGTGAATAGCGTAGGGTGCATAAAGATCCTCTCGCCGCAAGACCTGCAGCAGATGGCCCGCGGCGGCGGAGGTGACCTTCTGTCTGCGCCTGGAGCGAGGATGCTGCAGGGCAGTGTCTGTGACGACTATTCTGCAGGCCACGACGTGCAGAACCTCACCGGCAGCATTGCGCCTGTGGTGCCTCTGGACTACTGA
>Zm00001d031522_T001
ATGGAGGCGCCGGGGACGAGCTCGGGCGGCGCCGGAGGCGAGGGGGCCGGGGGCACCAAGGTCAACGAGGAGCTGTGGTACGCGTGCGCGGGACCGCTCGTGGCGCTGCCGCCGGCGGGGAGCCTCGTTGTCTACTTCCCGCAGGGACACAGCGAGCAGGTAGCAGCATCTATGCGAAAGGATGCAGATGCCAAAATTCCGAGCTATCCAAATCTCTCATCTAAGCTTATATGCATACTCCGTAGTGTCACTATGCTTGCTGATCCTGACACAGATGAGGTTTACGCTCGAATGACTCTCCAGCCCGTTAGCAATGTGACGCATTGTGACAAGGAGACGTTGCTGGCAACAGAGCTTGCACTGAAACAAACCAGACCACAGACAGAGTTCTTTTGTAAAACACTGACTGCAAGTGATACAAGCACTCATGGAGGTTTCTCTGTGCCACGGCGTGCTGCAGAGCGAATTTTCCCCCATCTTGACTTCTCAGTGCAGCCTCCTGCTCAGGAACTGCAGGCCAGGGATTTGCACGATGCAATTTGGACATTCCGTCATATATATCGAGGCCAGCCTAAAAGGCATTTGCTGACTACTGGCTGGAGCCTATTTGTCAGTGGAAAGAGACTCCTTGCTGGTGATTCAGTCCTGTTTATTAGGGACGGAAGACAGCAACTCCTCTTGGGGATAAGGCGAGCAAATAGGCAGCCCGTTAACCTCTCATCATCTGTTTTGTCTAGCGACAGTATGCATATTGGAATTCTTGCTGCTGCAGCCCATGCAGCAGCCAATAACAGCCAATTCACAGTATTCTATAACCCAAGGGCTAGTCCTTCAGAATTTGTTATTCCTTTTGCCAAGTACCAGAAGGCCGTCTATAGCAACCAACTATCACTTGGCATGCGGTTTAGAATGATGTTTGAAACTGAAGAATCTGCAACAAGAAGGTACATGGGAACAATAACTGGTATAAGTGATATGGATCCTTTAAGGTGGAAAAACTCCCAATGGCGCAATATTCAGGTTGCATGGGATGAAGCAGCACCAAGTGAGAGACGCACCAGGGTTTCCCTTTGGGAGGTTGAACCTGTTATCGCTCCATTCTTCATTTATCCCTCGCCATTGTTCACTGCAAAACGTCCGAGGCAACCTGGGGTAACAGATGATGATAGCTCAGAAATGGACAATCTTTTTAAGCGGACCATGCCATGGTTTGGTGAGGAGGTTGGCAAGAGAGATCTGAGTACTCAAAACGGTTTAGTTCCTGGATTAAGTTTGGTTCAGTGGATGAATATGCAACACAACCCCTCTCTTGCCAACACGGTTATGCAACCGGAATTGCTAAATTCGTTAGCTGGAAAACCTGTACAAACTCTGGCTGCGGCTGATCTATCTAGGCAAATTAGCTTCCAGCCCCAGTTCCTGCAACAAAATAACATCCAGTTCAACACTTCGCTGCTACCTCCCCAAAACCAGCAGACCGAACAGTTAGCAAATGTAATAGCTACACCAAACCAATTGGGAAGTGTTATAGTACCACAAAAGGCAGTTCAAAATTCCAGTTCTGAACAGAAACAGAATCTGGTTACACAACCACTGCAAGTCAGCCAACCAATGGTTAGTGTGGCACAGCCTCAACTTGTCCATACTCAACTCCAGCAACCTCAAGTAGTTCTCCAGGCTCAGCCTCAGCAACCTCAAGTCATTGTCCAAGCTCAACTACAACAACAGCAACCTCTGGTTCAAAATCACACCACCATACAAAGTGGCCTTCAACAAATCCAGCTTCTGCAGCAACAGCAAGTTCAGCAGTCAGTGCAGGAACAACAGCAAATAAAGATACAGCCTTTTCAGGTACCTAATGATGCCAACATGGTAACACAGTTATCTGATCAGATGAAAATACAACTATTGAAGGCTCTACAGCCACAGCAGCCTCTGGTCATGGAACAGCAGAAAATGATATTTGATTTGCAGCAACAAGCAGTAAATTCTCAGTCAACTGCTCAGCAGTGCTCACAGGTAGCTACCCAAGTGGTTGGTTTGCATAGCAGTAGCACTAATCAGTACCCGACGCAGCAAAAGACTCAACCTCTCAAAACATTTCAAGATTTTCCTGGGAATGCTGTTTCTATTGTAAAACCAGAAATTGTCACCTCCGTGGGTGCTCGCTCTTTGCATGTGCCTGGTGGAGTGCAGTCAATGAAGATGGATGAAGTTCCCTCTTCTTCAACATCGCCATCCACAAACAACAATCCTGTTATTTTGCGATCAACTCCAAGTAGCTCCAAGAACCAATGTTTACCTACTGCAGCAAAGGCTCCTCAGTCATCTGTTGTATTGGGTTCTACACTTGAACAGGGTATGAAGCCTTGTGACAGTACACAACACCCAATGGTGATTCCCAAGCTGGCTGAAGAAAGGCCAGCTACTGGACAAGACTACATGAACAGCACTCAGCTGGATTATTTGGATACGTCATCTTCAGCGACTTCAGTTTGCCTTTCACAGGCTGACGGATCGCTGCAACAAAGTTTTCCACCTTCATCCTTCAATCAGCATCAACCGTTGAGGGAAGCAGTTCCAGATAGCGAGTTTGAGGTTACAGATGCAGGAAATAACTTTCTATTTGGGGCAAATATTGATGGCCATATGGAGCCTCTTAACGAAGACGATTTGCTTGGAACTGCCTTCGAAGCTGACAAGTACATGGAACAGATGCCAGGAAACGGCATCTCTAACTACATTTCATCAAAGGATTCTCAGCAAGAGTTATCATCTTCAATGATCTCACATCCATTTGGCGTTGCTGATATCGCGTTCAATTCCATAGATTCGTCGATCAATGATATCCAATTCTTAAACAGAAATTCCCGGGCTCCAGGTCCTGTTCAACAACGTATGCGAACATACACCAAGGTGCACAAGCGTGGCGCTGTTGGAAGATCTATCGACATCAACAGATATTCTGGTTACGATGAACTGAAGCATGACGTTGCCCGTATGTTTGGAATTGAGGGGCAGCTCAGCGACCAAAACAGAGTTGGCTGGAAACTGGTTTACGAAGATCACGAGAAGGATGTCCTATTAGTTGGTGATGACCCATGGGAGGACTTCGTGAACTGCGTGCGGTGCATCAGGATTCTTTCGCCGCAGGAAGAGAGGCAAATGAGGCTGGCCAGCGACTACGGAGACAGCTTTCTTGGCAACCAAGCGTGTAGCAGCTCGGACGGGGGTCGTCCGTGGAGGGTCACCGGCGACTAG
>Zm00001d032683_T001
ATGAAGGAGGTGGCCGAGGAAAGGTGCCTTGACCCGCAGCTGTGGCACGCGTGCGCTGGCGGCATGGTGCAGATGCCGCCCGTGCGCTCCCGTGTCTACTACTTCCCGCAGGGTCACGCGGAGCACGCGCATGGCGGCGGGGCCGCGGACCTCGCCGGGGCGCGAGCGCTCCCGTCGCTCGTGCTCTGCAGCGTCACCGGGGTGCGCTTCCTGGCCGATCCGGAGACCGACGAGGTCTTCGCCAAGATCCGCCTGGTGCCGGTCGCGCCCGGCGAGGTGGAGTTCCGAGAGCCCGATGAGTTCAGCGTCGACCCCGCGGACGCCCGGGAGAAGCTTTCTTCCTTCGCCAAGACGCTGACGCAGTCCGACGCCAACAACGGTGGCGGCTTCTCGGTGCCGCGCTACTGCGCCGAGACCATCTTCCCCAAGCTCGACTACCGGGCCGACCCGCCGGTGCAGACGGTGCTTGCCAAGGACGTGCACGGGGAGGTCTGGAAGTTCCGCCACATTTACCGGGGCACGCCGCGCCGGCATTTGCTCACCACGGGATGGAGCACGTTCGTCAACCAGAAGAAGCTCGTCGCCGGGGACTCCATCGTCTTCCTGCGCACTGAGCATGGCGAGCTGTGCGTCGGGATACGGCGTGTCAAGCGGGTGTCCTGTGGTGGCATGGAGTGCATGTCTGGGTGGAACGCCCCGGGGTATGGGGCCTTGTCGGCATTCTTGAAGGATGAGGAGGGTAAGATGATGAAGAGTCATGGTGGGTACATGAGAGGTAGGGGGAAGGTGAAGATCACGGATGTTGTCAACGCCGCAAGTCTAGCAGCGAGCGGACAACCATTTGAAGTTGTGTACTACCCGAGAGCTAGCACACCGGAGTTTGTTGTGAAGGCTGCATCGGTACAGAACGCGATGAGGAACCAGTGGTGCCCGGGGATGAGGTTCAAGATGGCATTTGAGACAGAGGATTCGTCAAGGATCAGTTGGTTTATGGGGACGATAGCTTCTGCTCAGGTTGCTGACCCAATCAGATGGCCAAATTCACCGTGGAGGCTTCTTCAGGTGGCATGGGATGAACCGGACTTGCTGCAGAACGTGAAATGTGTGAACCCATGGCTCGTGGAGATCGTATCAAGCATTCCACCGATCCACCTGGGACCATTTTCTCCACCTAGGAAGAAGCTGCGGGTGCCCCACCATCCGGACTTCCCGTTCGACGGCCAGCTGTTGAATCCGATTTTCCACGGCAACCCACTCGGTCCGAGCAACGGCGGCGGTGCTCTTCGCTGTTTCTCGGACATCGCTCCTGCAGGCATACAGGGAGCCAGGCATGCTCAGTTCGGTCTACCACTAACAGACCGCCAGCTTAACAAGCTGCACCTCGGTCTGTTCCAAGGCGGCGGTTTTAAGCGGCGGCTTGACGCTATCACTCCACCATGCCCTATATCCAGGGGCTTTGTGATCGGCAGTGCACCGGTCGACGAGAGCGTCTCTTGCGTGCTGACGATCGGCACGCCACGGGCCGCAGAGAGATCTGACGACAGGAAGAAACCACATCTAATGCTGTTCGGAAAGCCTATCCTTACCGAGCAGCAGATGAGCTCTAGAGGGTCAAGGGAAACACTCTCCCCTGAGGCCACTGGGAACAGTTCCGATGGCAGTGTTCAGAAAACGGGAAACGTATCCGATGGCTCCGGCTCGTCGATCTGCATCGGTTCCTCGTCCCGAGGCCGCGAGGCTTCTAGGCTCGGGTTCGAATTTGAAGCCGGGCACTGCAAGGTATTTGTGGAGTCGGAGGATGTCGGTCGCACCATCGACCTGTCCGTCTTTGGCTCGTACGAAGAGCTGTACGGTCAGTTGGCCGACATGTTTGGAATCGAGAAGGCAGAGGTAATGAGCCACCTTTGTTACCGTGATGCTGCTGGCGCTGTCAAGCGTACTGGCGACGAGCCGTTCTGTGACTTCATGAAAGTGGCACGGAGGCTCACCATAGTAGAGAGCACCGAGGGGAGGCTGCAGAAACCTCTCGTCGAGTACATGGCTTGA
>Zm00001d036593_T001
ATGAGGCTCTCGTCGTCGTCGTCGTCGTCCGCCAGCGTCCTCCCGGCTCAGCCGGGCTCGCCGGAAGGGCCGGCCCTGAGGGTGTGCAGGTATGCGACCGCTCAGGGCCCCCAAGTTCATTCTCCCATGATATCTCGTTCCATAAGAAACTTGCAGATTGCAGTATTGAGTTATCAAAACAAAACAAATACTTCTGCCGTTACAGATGTGGAGGAGCACAAGTGTCTGAACTCGGAGTTGTGGCATGCCTGTGCCGGCCCGCTTGTCTCCTTGCCAGCGGTGGGTAGCCGGGTTGTGTACTTCCCTCAGGGCCACAGCGAGCAGGTAGCAGCATCAACAAACAAGGAAATGGAGTCTCAGATCCCCAGTTATCCTAATCTGCCGCCACAGCTTATATGCCAACTGCATAATGTGACGATGCAAGCTGATGCAGAGACAGAAGAGGTATATGCACAGATGACATTACAACCACTCAACCCGCAAGAACTGAAGGATCCATATTTACCTGCAGAATTAGGTTTGGTCAGTAAACAGCCAACAAACTATTTCTGCAAAACATTAACAGCAAGTGATACCAGTACCCATGGTGGGTTTTCTGTTCCCCGTCGAGCAGCTGAGAAAGTGTTCCCTCCACTGGATTTCACCCAGCAGCCTCCATGCCAGGAGTTGATGGCAACAGATCTTCATGGCAATGAGTGGAAATTCCGTCACATATTTCGTGGTCAGCCAAAGCGGCATCTTCTAACTACAGGCTGGAGTGTCTTTGTAAGTGCAAAGAGACTCGTTGCTGGTGACTCTGTCCTTTTTATCTGGAATGACAATAACCAGCTTCTGCTTGGAATTCGTCGGGCAAATCGGCCACAAACAGTCATGCCATCTTCAGTCTTATCAAGTGATAGCATGCATATTGGTCTTCTTGCTGCAGCTGCTCATGCTGCTTCGACAAATAGCCGGTTTACAATTTTCTACAACCCAAGGGCAAGCCCTTCAGAGTTTGTCATACCGCTTGCAAAGTATGTTAAGGCTGTGTATCATACCCGTATATCTGTGGGGATGCGCTTCAGGATGCTTTTTGAGACAGAAGAGTCTAGTGTTAGGAGATACATGGGGACTATTACCGGAATCAGTGATCTTGATTCTGTTCGGTGGCCAAATTCACACTGGCGTTCTGTTAAGGTTGGCTGGGATGAATCAACTGCTGGCGATAGACAGCCAAGGGTGTCACTATGGGAGATTGAGCCCCTGACAACTTTCCCAACGTATACATCTCCTTTTCCGCTCAGGCTCAAGCGTCCATGGCCAACAGGCTTGCCTTCTCTGCATGGTGGGAAGGATGATGACCTGGCTAACTCTCTCATGTGGCTTCGAGATACCACAAATCCTGGTTTCCAGTCGTTAAATTTTGGTGGACTTGGTATGAACTCTTGGATGCAGCCAAGGCTGGATACTTCCTTACTTGGTCTGCAGCCTGACATGTATCAGGCGATGGCCACAGGTGCTTTCCAGGATCCAACAAAGCAGGCATCACCCACAATGCTGCAGTTCCAGCAGCCACAGAACATAGCTGGCCGGGCTGCGCCACTTTCAAGTCAGATTTTGCAGCAAGCACATCCTCAATTTCAGCAGCAGCCGTACATCCAAAACATCTCTGAGAGCACAATCCAAGCGCAGGGTCAGTCTGAGTTCCTCAAACAGCAGATCCAACGCAGCCAGTCATTCAATGAGCAGAAGCCCCAGCTGCAACCCCAGCAAGAATCACAGCAGCAGCAGCAATCACAGTGTCTGCAAGCCCCTCAGCATCAACAAATACAACAGAACATAGCCAACTACCAGTCTGTATCCAATGCATTATCGGCGTTTTCTCAGCTGTCGTCAGCCTCTCAGTCTACACCTATGGCACTGCAAACTATATTACCGTTCTCACAGGCACAGAGCTTTACAGACACGAGTGCAAGCTCATTGTCTCCATCCAACACCAACACAATGCAAAATACGCTTCGGCCATTCTCATCAGAAGCAGTTTCTCACCTCAGTATGCCGAGGCCCACTGCGATACCTGTTCCCGACGCATGGTCATCGAAGCGAGCTGCGGTGGAGTCTTTGCTTCCTTCTCGGCCCCAAGATTCGTCTCAAATGCAACAGTTGGACTCTACACCAGCTAGTATACCTCATAGCTCTGCGTTGGCACCACTTCCTGGGAGAGGATGCTTGGTGGATCAAGACGCGAACCCTGATCCTCAAAACCATCTCTTGTTTGGTGTCAGTATAGATTCGCAGTCACTGCTAATGGAGGGAGGCATCCATGGTCTCCAAAATGGCAATGATTCGACCGCTATACCTTATTCCACCTCCAATTTCCTGAGCCCTTCCCAGAACGATTTTCCTTTGGATCATACTCTGAATTCTTCAGGCTGCTTAGATGATTCAGGGTACGTCCCGCCATGTTCGGATAATTCTGACCAAGTGAACCGACCACCAGCAACCTTTGTGAAGGTTTACAAATCTGGAACCTACGGAAGGTCGCTTGATATCACCAGGTTTAGTAGCTATCACGAGCTCCGTAGGGAACTAGGGCGCCTATTTGGCCTTGAGGGCCAGTTGGAAGACCCTCTGAGATCAGGCTGGCAGCTTGTATTCGTCGACCGCGAGGAGGACGTCCTTCTCGTGGGCGACGACCCTTGGCAGGAATTCGTGAGCACGGTGTCCTGCATAAAGATACTCTCGCCGCAGGAGGTGCAGCAGATGGGCAAGCAGGGCCTGGAGCTCCTGAGCTCGGCCCCCGCGGCGCGGAGGCTAGGTAGCAGCTGCGACGGCTACGTTAGCAGGCAGGAGTCGAGGAGCCTAAGCACTGGGATCGCGTCCGTGGGTTCGGTCGAGTTCTGA
>Zm00001d038698_T001
ATGGGGATTGATCTCAACGCCGTGGGGGAGGACGACCCGGCGGGCGCGGTGTGCGCGGAGCTGTGGCACGCGTGCGCGGGGGCTGGAGTGGCGCTGCCGCGGCGGGGCAGCGCCGTGGTGTACCTGCCTCAGGCGCACCTCGCGGCGGGCGGCTGCGACGGTGGTGGGGTGTCGGCGCCGGCCCCGCCGCGCGTGCCGCCGCACGTGGTGTGTCGCGTCGTCGACGTCGAGCTACGCGCGGATGCGGCCACGGACGAGGTGTACGCGCGGCTTGCGCTGGTGGCGATGGATACGATGTTTGGCCGAAACATCAATGATGGTGAAACTGAAGAGAAGAATGGCGAGGAAGAGGATGGCGACGGAGAAAAGAAGCACGCATCACACATGTTCTGCAAGACACTCACAGCTTCTGATACCAGCACACATGGGGGATTCTCTGTTCCACGGCGAGCTGCAGAGGACTGCTTTCCACCATTGGACTATGAGCAGCTTAGGCCTTCCCAAGAGCTTATTGCCAAGGATTTGCATGGCATGAAATGGAGGTTCCGTCATATCTATAGAGGTCAACCTCGAAGGCATCTTCTGACAACTGGATGGAGTTCATTTATCAATAAGAAGAAACTAGTCTCAGGGGATGCAGTCTTGTTTCTTAGAGGTAATGATGGTGAGCTAAGATTGGGTGTGAGGAGAGCAGTTCAACTGAAAAATGAAGCTCTACTTGAAGCTGTCAACTGTACTGATTCGAAGCTACTTATGCTGTCTGCTGTGGCCAATTCTTTGGACAACAGAAGTATATTTCACATCTGTTTCAACCCAAGGGTTGGTGCATCAGAATTTATTGTGCCGTATTGCAAGTTCTTGAAGAGCTTGAACTATCACTTTTCAGTTGGAACCAGATTTAAAGTTGGCTGCGAGAATGAAGATGCTAACGAGAGGTCCTTTGGATTGATCATAGGTATTAGTGAAGTTGATCCCATACACTGGCCTGGATCAAAATGGAAATCTCTCCTGATAAAGTGGGATGGTGCTACTAAGTACAGCCACCAGAATAGAGTATCTCCATGGGACATCGAGGGAGTTGGCAGCTCAGTTTCAGTTACTCACCGACTTTCCTCTTCTGTTTCGAAGCGAACAAAACTGTGCTTCCCTCCAAGCGATTTGGACACGCCAATTCTAGATGGAAACGGTCGTCCAGACTCAGTGGAAACTGAACGTTTCCACAGGGTCTTGCAAGGTCAAGAATTGGTGCACTCTAGTATTCATGGTACTGCATGCTCTCATTCATCAGATAGCCCCAGATGTCAAGGCTCTTATGGCAGGAGATTCTCTGCTGATGCGTGGAACTGCAAGATGAATGATGTAATGAGTGGGCCTCGACACCTAAATGCCACTGGGTTTGCTTACCAGCCCCTAGGCTTCAGTGAATCTGTCAAATTCTCAGAGGTCTTGCAAGGTCAAGAAATGTCTCAGGCGGTTCCTTCCTTCATGAGATCTGCTTTCAACTCTGGCACGCAGAATGGCAGGGTTCGACCATTTGATTATGTGCAGAGATCAGATGCAACTCAAGGATACGCTCTCCAGCAGTTTAATCTGCCAGCAACAGAAGTGCATTCGCCCTCTTCTGTTCTTATGTTTAACCAAACCATGGTACCACATGCTGAGCTAGATGGTGCGACCAACCGTGAAGAAGTACATGGCAGCAGGTACTTGTCATCCAATGCAATAGGGAGAGAAGCTGAACCATGGCCATCCATGCAGCAGCAAAGAGCGAGTGTAAATGGAAGCGAGCCTCTCGACACAACTGAAGCCTCAGCTCCTGCAAGGAACGCTGAATCTGGATCGGTCGGCAGGGGCGCGGGGCGAAGCAACTGTAAGCTTTTTGGTTTCTCCCTGACTGAGAAGATCCTTGGAACGGATGGTGGTGGTGTGAAAGAAGGGAACTACGAAGTGGACCGTCAAACTCCCCGGGTGCTAGACTTGTTTGGGCACGGTTCTACGCCTGGAGCTCTGCATGCTCTCTGTGCTGCTCCCTTGGGAATATGA
>Zm00001d039006_T002
ATGGCGGGGATCGACCTCAACGACACCGTGGAGGAGGACGAGGAGGAGGCGGAGCCCGGCAACGCCTGCTCCCAGCAGAGCCGGACCAGCTCCGCGGCCACGTTCCCGCCGCCGCCGCCGAACCAGCCGAGGCCGAGCGCCGCGGTGTGCCTCGAGCTGTGGCACGCCTGCGCCGGCCCCGTCGCGCCGCTGCCGAGGAAAGGGAGCGTCGTGGTGTACCTCCCGCAGGGACACATCGAGCACCTCGGCGACGCCGCGGCCGCCGGCGGAGGCGCGCCGCCGCCCGTCGCCCTGCCGCCCCACGTCTTCTGCCGCGTCGTCGACGTCACTCTCCATGCGGACGCGTCCACGGACGAGGTGTACGCCCAGCTCGCCCTCGTCGCCGAGAACGAGGATGTCGCGAGGCGGCTGCGCGGACGGTCGGAGGACGGCAGCGCCGAGGACGGCGACGAAGGGGAAACCGTGAAGCAGCGGTTCTCGCGGATGCCGCACATGTTCTGCAAGACGCTCACGGCCTCCGACACCAGCACGCACGGCGGCTTCTCCGTGCCACGCCGCGCCGCCGAGGACTGCTTCCCGCCTCTGGACTACAGCCAGCAGCGACCGTCGCAGGAGCTTGTGGCCAAGGATTTGCACGGAACCGAGTGGAGGTTCCGCCACATTTATCGAGGGCAGCCCCGCAGACACCTTTTAACCACTGGATGGAGTGCCTTTGTCAACAAGAAGAAGCTTGTCTCAGGGGACGCCGTACTATTTTTGAGGGGTGATAATGGGGAGCTAAGACTTGGAGTGCGCCGTGCAGCTCAGCTTAAAAATGGATCTGCTTTTCCAGCTCTTTATAACCAGTGCTTAAATCTTGGTTCACTACCTAATGTTGCACATGCTGTGGCCACCAAAAGTGTGTTCCACATCTACTACAACCCCAGATTAAGCCAATCTGAATTCATTATACCATTTTCGAAGTTTATCAAGAGCTTCAGTCAACCATTTTCTGCTGGTTCGAGGTTCAAAGTGAAATATGAGAGTGATGATGCTTCTGAAAGAAGATGCACAGGGATCATAGCAGGAATTGGTGATGCTGACCCCATGTGGCGTGGTTCGAAATGGAAATGTTTGATGGTATGTTGCCTTTTAAGCTTTAATGATTCACTTTCTGTTCGATGGGATGACGATGTAGATTTTCGTCAACCAAACAGGATTTCTCCTTGGGAGATTGAGCTGACTAGTTCAGTTTCAGGATCTCACATGTCTGCACCAAATGCAAAGAGACTGAAACCATGTCTTCCCCATGTTAATCCAGACTACCTAGTTCCAAATGGAAGCGGTCGTCCTGATTTTGCGGAATCTGCCCAATTCCACAAGGTCTTGCAAGGTCAAGAATTACTGGGTTATAGAACTCATGACAATGCTGCTGTTGCAACTTCTCAGCCATGCGAAGCAACGAACATGCAGTACATTGATGAACGAAGTTGCTCCAACGATGCGAGTAACATTATCCCGGGGGTTCCAAGAATTGGTGTCAGAACACCACTCGGAAGCCCTAGGTTTTCCTACCGTTGCTCAGGCTTTGGGGAGTCTCCAAGATTCCAAAAGGTCTTGCAAGGTCAAGAAGTATTTCATCCCTACAGAGGAACTCTGGTCGATGCAAGCTTGAGTAATAGTGGCTTCCATCAGCAAGATGGTTCTCATGTGCCTACTCAGGCCAGCAAGTGGCACGCACAGCTACATGGATGTGCTTTTCGTGGCCAACAAGCACCAGCTGTTCCATCTCAATCCTCATCCCCACCATCTGTCCTGATGTTTCAACGAGGTGATCCAAAGATGTCCCCATTTGAATTTGGGCATTTCCACGTGAATAAGAAAGAGGATAGACGCGCAATGTTTGTCCATGCTGGAGGCATCGGAGGAACTGAGCAAACGACGATGCTCCAGGCTCATCATGTTTCTGGAGGAACGGGAAACAGAGATGTGACCGTTGAGAAATCTCATCCCGCTGTTGCCGCTGCTTCAGACAACAGGGAAGTTAGCAAAAACAGTTGCAAAATATTTGGCATATCTTTGACCGAGAAGGTTCCAGCAATGAAAGAAAAGGGCTGTGGTGACATCAACACCAACTATCCATCCCCCTTCCTGTCTTTGAAGCAACAAGTGCCGAAATCGCTGGGCAACAGCTGTGCCACCGTTCATGAGCAGAGGCCTGTTGTTGCTAGGGTGATTGACGTTTCAACAGTGGATATGATGATCTGA
>Zm00001d039267_T001
ATGGCGCAAGGAGCAGGACGGGACCCGGAGGAGCTCTTCGAGGAGCTGTGGCGCGCCTGCGCGGGGCCGCTCGTGGAGTTGCCCCAGACCAACGAAAGGGTCTTCTACTTCCTCCAGGGTCACCTAGAACAGCTGCAAGAGCCGACGGACCCGGCGCTGCTGGCTGAGCAGATCAAGATGTTCCAGGTGCCCAACAAGATCCTCTGCAAGGTCGTCAACGTCGAGCTCAAGGCACGCCGAGACAGAAACGGACGAGATGTACGCCCAGATCACTCTGCAGCCGGAACCAGATGCAAAGCAACTTCACAAGTGGATCTACCCCAATTACCTGAACCGCCCCTGCAGGAGACGTCAAGGCCCGTGGTGCACTCCTTCTGCAAGATCCTCACACCATCCGACACCAGTACTCATGGCGGTTTCTCCGTTCTTCGGCGTCATGCAAACGAATGCCTCCCAGCACTGGATATGTCGATGCCGACCCCGACCCAAGAGCTCATCACAAAGGACCTACATGGATCTGAATGGAGGTTCAAGCACATATACAGGGGCCAACCCCGTCGGCACCTTCTGACTACTGGATGGAGCACGTTTGTCACATCAAAGAAGCTGATTGCTGGTGACGCGTTTGTCTACCTGAGGAGCGAGACCGGACAGCAGCGTGTGGGAGTGAGGCGCCTCGTGCAGAAGCAAAGCACAATGCCAGCATCTGTTATATCAAGCCAAAGCATGCATCTTGGGGTGCTTGCAAGTGCATCACACGCTATTAGGACTCATTCCATTTTCCTAGTGTATTATAGACCAAGGTTAAGCCAAAGCCAATACATCGTCAGGCTGAACAAGTACCTGGAATCTAGTAAAATTGGATTCGATGTGGGCATGAGGTTTAAGATGAGTTTTGAAGGGGATGACGTCCCTATAAAGAAGTTTTCTGGAACAGTTGTCGATAAAGGAGATCTTTCTCCACAATGGCAAGGTTCTGAATGGAAGACATTGAAGGTCAAATGGGACGAAGCCACAAACTTAAATGGCCCTGAGAGGGTTTCCTCCTGGGAAATTGAACCATTCGATGCATCCGCACCTGCCATCACCATGCCCGTGCAACCATCAATGAAAAACAAAAGGCCTAGGGAGACAGCTGAAGGCCTGGATATTCATGCACTGGAACCTGCTCAAGAATTCTGGCTCTCTGGAAGGCCTGAACAGCATGAGAAGACAAGCGTAAGCTCCAGCGAACCCAAACATCAAGTCGCTTGGACAAGTGAACGCGCAGGATACAGTGCCATGAGCAGTTCAATCTGTCAGAATTCTGCAGTAACTGGGAGCTGGTTCAAGGGCTTCAATTCCTCCGGCTCACACCCTTCCCTGCCAGAGATCTCCCAGAAACTGTTTCAGGTCACCAGCAACGACGCGAGGGTTCCTCCTTGGCCTGGGCTCTCCGCTTATCATGCTGACGAGCCCTCTTCCAAGCTGTCCTGCAACACTGCTCTGTGCAGCTACCAGACCGAGGAGGTGGCTCCAAGATTTTCCAATGCCGTCGAAGAGGAAAAGAAGGAGCCCGGCATGTTCCGTCTGTTTGGCGTCAATTTGATTAACCATGCTAGGAGTAGTGCTACCGCTGACAAGACGAGTGTGGGAGCAGGGGAAACATCGGCGCGAGCTGCTGGTTCTTTTGAAGACTCTGCTCAGCTATCAAGAGTGACGAAGGATCATACGCACATGGTGAACGGAAGCCCCCGAGAAATCCAAAGCCACCAGAGTTGCAGTGGAAGGAGTCGTATCAAGGTTCAAATGCATGGAAATGACGTGTGCAGAGCTGTGGATTTGGGAAATCTGGATGGGTACGAGCAGCTGATGGGTGAGGTTGGAGAGATGTTTGAGATCAAAGACCTTGGCTCCAAAGAGAAAGAGGAATGGAAGGTTACTTTCATTAACGACGAGAATGAGACAATGGAAGTCGGAGCTGTTCCTTGGCAGGAGTTTTGCCAGATGGTGAGGAAGATCGTGATCCATTCCATTGGAGACAGGGGCCATATGGAGGCTTGCCCTTGCCTGGGGCAGGATGGGAAGAGGGACTATTAG
>Zm00001d041056_T001
ATGGCGGCGGCTGCCTGCGCCGGTGCGGAAGCAGGACGCGGATGCGGAGGGAAGGACGCGCTGTTCGTCGAGCTGTGGAAGGCCTGCGCGGGGCCGCTGTCCTGCGTGCCGCCGCTTGGGGAGAAGGTCTACTACCTCCCGCAGGGCCACATCGAGCAGGTGGAGGCATCGACGAACCAGCTTGCCGAGCAGCAGGGCACGCCCCTCTACAACCTGCCATGGAAGATTCCCTGCAAGCTCATGAACATCGAACTGAAGGTTGAGCCGGATACTGATGAGGTGTACGCCCAGCTCACCCTGCTCCCTGATAAGAAGCAAGATGAGAATACATCTACAACAGTGGAGGAAGAGGAGGTGGTGGTGCCTCCTGCGCTACCAGCCACAAATGAGGGTCCTCACATCCATTCCTTCTGCAAGACATTGACTGCCTCAGACACAAGCACACATGGTGGTTTCTCAGTGTTGCGCCGGCATGCAGATGAGTGCCTCCCACCATTGGATATGAGTCAACATCCCCCAAATCAAGAATTGGTGGCCAAGGACCTGCATGGGGCCGAGTGGCGGTTCCGTCACATCTTTCGAGGTCAGCCACGGAGACATCTCCTGCAAAGTGGTTGGAGTGTTTTTGTGAGCGCCAAGCGTCTTGTCGCGGGGGATGCCTTCATATTTCTCAGAGGTGAGAATGGGGAGCTCCGTGTTGGAGTTCGGCGTGCACTGAGGCACCAAACCACTATCCCATCTTCAGTCATATCAAGCCACAATATGCATCTTGGTGTTCTTGCAACAGCATGGCATGCAGTGAACACTGATAGTATGTTCACTGTCTACTACAAGCCAAGGACTAGTCCAGCTGAATTTGTGGTTTCGCGAGATAGGTACTATGAATCACTGAAACGAAATTATTCAATAGGGATGAGATTTAAGATGAGATTTGAAGGTGAAGAGGCAGCAGAGCAAAGATTCACTGGCACAATAGTTGGAATAGGTGCTTCTGATCCATCTGGTTGGGCTGACTCAAAATGGCGTTCCCTTAAGGTGAGATGGGATGAACCTTCTTCTATTTCTCGTCCTGAAAGAGTTTCTCCTTGGCAAATAGAACCTTCTGTTAGCCCATGTCATGTGAACCCTCTTCCAGTTAGATTCAAGAGGTCTCGATCAAGCGTTAATGCTTTGCCATCTGACGTGTCTACTGTAACCAGAGAAGTCACTTCTAAAGTCATGGCAGACTCGCAGCAAAATAGTCTCACAAGAGCCTTGCACAATCAAGGAAGGACACAATTGACAGTTCGATACCATGATAACAGTGATGTGAAGACTACTCAGGATCTTACCGTGTGGTCTTCAGGAACTGAGCAACAGAGAAACAATATTGCTGCCCAGACAAAGCTATGTCTGGAGGGTTGGACGCCAACTAGAAGTCCTGAAGGCTACAATCAGATATTCTCGGCATTTAAACCACTGAAAGATATACATAACCCACTTGGTCCTTTTCCTAGTCAAATATCTGGGACTCACTCAAATAGCTGGGACACAGCTGATGCTCGTTATCCAGTCCAACAAGCTAATTACAGCATGTTACCTGGCACATGGTCTTTGAGGCCTCATAACAGTGGTTTTAGGATGAATCAACAAAATTATCTAGTGATGCCTGAAGGTGCAAATTTTACGGGGAAATCAGCTTTCACTTCACTTCAGGACCATGGCACTGATAAATGCTCCACAGGCTGCTTTGGTCATATTGAGTCAAGTTCCCACACAGACCATGCATCCTCAAGTTTGATCAGGCCCCAGCCTTTGGTCCTTGGAAATGGTGTTCAGAAAAGCAAAGGCACTTCATTTAAATTATTTGGGATTCCCCTTGGCAGCCCAGAAAAATCTGAACCTCTGGTATCCCCACCAAGTGTCGCATATGACGGGAAACTTCAAACTTCTCCATCAGAAAAAGGGAATCAGCTAGACGTAGTTGAAGTGGATAATTGTTCTCATCCTTCTAAGACTGTGAAGCCACTTGATGGTCCTCAGTCAGATTCTATTACAGAGAATAATCAGCCTTCTCCAGAAGCTACCCTTAATATCCAGAACAAAGTGCAAAGTAGTTCCACCAGAAGCTGCAAGAAGGTTCATCATATGTTGCACCTTTTTCCTTGCTAG
>Zm00001d041497_T001
ATGAACCTCTCACCGCCCAGGATGTCGGAGCCATCGCTTGAAAGTGACGGGGAACAAAGGTGTCTGAACTCGGAGCTATGGCATGCATGCGCAGGGCCCCTTGTGTCCCTTCCTGTGGTTGGGAGCCGGGTCGTCTACTTTCCCCAGGGCCATAGTGAGCAGGTTGCTGCATCAACTAATAAAGAAGTTGACGCTCAGATCCCAAACTACCCAAACCTACCTCCACAATTAATCTGCCAGCTTCATAATGTCACAATGCATGCTGATGCAGAGACTGGAGAGGTTTATGCCCAGATGACACTGCAACCATTGAGCCCGGAAGAGCAAAAGGAACCTTTTCTTCCAATTGAATTGGGTGCTGGTAGCAACCAGCCAACTAATTACTTCTGCAAGACGTTGACTGCAAGTGATACGAGTACCCATGGCGGGTTCTCTGTTCCACGCCGAGCAGCTGAGAAAGTCTTCCCCCCATTGGATTTTTCACAACACCCTCCAGTGCAAGAGCTGGTTGCAAGAGATCTGCATGATAATGAGTGGAAATTCCGCCACATTTTTCGTGGTCAGCCAAAAAGGCATCTACTGACGACTGGTTGGAGTGTTTTTGTAAGCGCAAAAAGACTAGTAGCAGGGGATTCTATCATATTTATCTGGAATGATAATAACCAGCTTCTATTGGGAATTCGTCGAGCAAATCGTCCACAGACTGTTATGCCCTCTTCCGTGCTATCAAGCGATAGCATGCACATTGGTCTCCTTGCTGCAGCAGCTCATGCTGCAGCCACAAACAGTCGTTTCACTATTTTCTACAACCCCCGGGCCAGCCCTTCTGAGTTTGTGATTCCACTGGCTAAGTATGTGAAAGCTGTCTACCACACACGTGTGTCTGTTGGAATGCGGTTTCGGATGCTTTTTGAGACAGAGGAATCAAGCGTCAGACGATACATGGGTACGATCACATGCATAAGTGATCTGGACTCAGAGCGTTGGCCAAATTCACACTGGCGTTCTGTGAAGGTTGGTTGGGATGAGTCTACAGCTGGTGATAAACAGCCAAGAGTTTCACTCTGGGAGATTGAACCACTGATGGCCTTTCCGATGTACCCAACTGCCTTTCCATTAAGGCTAAAGCGTCCGTGGGCTTCAGGGCTACCTATGTTCAATGGTGGGAGGAGTGATGAGTTCGCTCGTTATTCTTCTCTCATGTGGCTCCGAGATGGAAACAGAGGGGCTCAATCACTGAACTTCCAGGGACTTGGAGCATCACCATGGCTTCAACCAAGAATAGATTATCCATTATTAGGTCTGAAGCTAGATACTTACCAGCAGATGGCTGCTGCTGCACTGGAAGAAATTAGAGCTGGGGATCATTTGAAGCAGATATCTTCTCTCCTGCCAGTGCAACAGCCACAAAATTTGAGTGGTGGATTAGATCCTTTATATGGAAATCCTGTTCTGCAGCAGATGCAGTTCCAATCTCAGCAGTCATCCTTGCAAGTTGTGCAGCAAGGTTATGGTCCAAATGCAAGCGACTCTGGGTTCCTTCAAAATCAGCTGCAGCTGCAAAAGCAGCAGGAGCCACTACCACAGCAGCAGCAGCAAGCTCTGCAACAACAATCGCATCAGGAAATGCAACATCACCTCTCAGCTAGCTGTCATGATATTGCTAATGTAGCTTCTGGTGTGTCTGAGTCTGGATCTGCTTCTCAAACAGAATCTTCTTTGCTTTCTGGGTCATCGTACCAACAGATCTATGATGGAAACAGTGGTCCAGGTCTGCATCTGCACAACGGTTTCCACAACTGTTCAAGCCAAGAGTCCTCCAACCTTCTTAATCTCTCAAGAAGTGGACAATTCATGGCATCAGAGGGATGGCCTTTGAAGAGGTTGGCTGTGGAATCTCTTTCTGGTCATGAGCTCCAACCTGTGCAGCACAAGTTTGAGAAAGTGAATCACCAAAGTAATGTGTCTCACATTTCTAGCACCTTGCCCCCACTGTCAGCAAGAGACAGTTATAGTGCCCAGGCTAGTGGTACAAATGATCAGAGTCACCTGCTTTCATCATCATTTGCAATCCATGATGGCTTGACAGCCGTCAGGAGTGGTGGTGTTGGCAGTGGAACTGATGCGATAACCATAGCTTCGTTGAGATATAATGATATGAATTTGCTACCTGAAAACCCCATCGCAACTTCCAGTTGTTTGGGCGAATCAGGAACCTTCAATTCTCTCGACGATGTGTGTGGTGTAAACCCATCACAAGGTGGAACCTTTGTGAAGGTTTACAAATCAGGGTCCCCTGGGAGATCGCTCGACATCACCAGGTTCAGCAGCTACTACGAGTTACGTAGCGAGCTCGAGCGGTTATTTGGTCTTGAAGGCCAACTGGAGGACCCTGTAAGATCAGGCTGGCAGCTTGTATTCGTTGACCGGGAAAACGATATTCTTCTCGTCGGCGATGACCCGTGGCAGGAGTTTGTGAATAGTGTATGGTGCATAAAGATCCTCTCGCCGCAAGACGTGCAGCAGATGGTCCGCGGCGGAGGCGACCTTCTGTCTACAACTGGAGTGAGGACACTGCAGGGCAGTGTCTGCGATGATTATTCTGCAGGCCACGACATGCAGAATCTCACCGGCAGCATCGCACCTGTGGTGCCTCTGGACTACTGA
>Zm00001d042267_T001
ATGCTCATGCCGGAGCCCGAGCAAACCGATGTGCCGGCTGAGAAGCCGAGTTCTGCACCTGCTGCGTCGCCGAGGCCAGCAGTCAGGTCCTTCTGCAAGACGCTCACCGCCTCGGACACCAGCACACACGGTGGCTTCTCTGTGCTGCGCCGACACGCTGACGAGTGCCTCCCTCCCCTGGATATGACCCAGTCGCCTCCCACACAGGAGCTGGTGGCGAAGGATCTGCATGGCATGGAGTGGCGCTTCCGCCACATCTTTAGAGGGCAGCCAAGGAGGCATCTCCTTCAGAGTGGTTGGAGTGTTTTTGTTAGTTCTAAAAGGCTTGTTGCTGGTGATGCCTTCATTTTCCTCAGAGGAGAAAATGGTGAACTTCGAGTTGGTGTTAGGCGGGCAATGAGGCAATTGTCTAATGTACCTTCTTCAGTCATATCTAGCCAAAGCATGCACCTCGGAGTCCTTGCGACTGCATGGCACGCCATTAACACGAAGTCCATGTTCACTGTCTACTACAAGCCTAGGACGAGCCCTTCAGAGTTCATCATACCGTACGATCAATATATGGAGTCGGTAAAAAATAATTATTCTATTGGCATGAGATTCAGGATGAGGTTTGAAGGAGAAGAGGCGCCAGAGCAGAGGTTTACTGGTACAATAGTTGGTTGTGAAAATCTTGACCCACTATGGCCTGATTCCAGTTGGAGATACTTGAAGGTGCGTTGGGATGAGCCTTCTACTATCCCGCGGCCAGATAGGGTCTCTCCTTGGAAGATAGAGCCTGCTTCATCGCCTCCTGTTAATCCACTCGTGCATTCTTCTAGAGCAAAAAGACCTAGACAAAACGTTCCTCCACCTTCACTTGAATCATCTGTTCTCACAAAAGAAGGTGCAACCAAGGTCGAAATCGATTCAGCTCAAACACAACACCAAAATTCGGTCTTGCAAGGTCAGGAGCAGATGACCTTGAGGAACAACCTGACTGAAAGCGCTGATTCTGATTCCACTGTTCAGAAGCCGATGATGTGGTCCCCATCACTCAATGGGAAAGCCCACACTCATTTTCAGCAGAGACCTGCTATGGATAATTGGATGCCATTGGGAAGGCGTGAAAATGACTTCAAGGACACCCGTTCTGCCTTCAAGGATGCCCGCACCGCCTCTCAATCATTTGGAGATACACAGGGTTTTTTTGTGCAAGCTTATGATGACAATCATCACCGTCTCTCTTTCAAAAATCAGGGTTCAACTCATCGCTTCGCAGATCCGTACTTCTATATGCCTCAACAATCGTCAGTGACGGTTGAATCAAGCACAAGGACACAAACAGCAAACAATGACTTGTGTTTCTGGGGTGACCAGAATGCTATGTACGGCAATCCAAGTGACCAACAACAGGGTTTCAACTTTGGACAAAACCCATCAAGTTGGTTGAACCAGCCATTTCCCCAGGTTGAACAGCCACGAGTGGTCAGGCCTCATGCAACGGTTGCTCCATTTGATCTGGAGAAGACTAGAGAAGGAAGTGGCTTCAAGATTTTTGGGTTCCAAGTTGATACAACCAGTCCATCTCCTGTCCAATTGAGCTCTCCATTGCCCGCTATCCAGGAGCATGTGTTACAAACTCGACCATCGGCACCGGTGAATGAATTGCAACCTGTGCAAATTGAGTGCTTGCCTGAGGGATCTGTAAGCACAGCTGGAACTGCAACGGAGAACATTCAGCAAGCCCCGCAGAGTTCAAAAGATATCCAAAGCAAGTCCCAGGGTGCTTCAACAAGGAGCTGTACAAAGGTTCATAAGCAAGGAGTCGCACTTGGCAGGTCGGTGGACCTCTCTAAATTCACCGACTACGGCGAACTCCAAGCAGAGCTGGACAAGATGTTTGACTTCGAGGGTGAATTGGTATCTGGCAGCCAAAACTGGCAGATCGTCTATACCGACGACGAGGGCGATATGATGCTTGTGGGAGACGACCCGTGGGAAGAGTTCTGCAGCATAGTGCGCAAGATCTACATCTACACGAAGGAGGAGGTCCAGAAGATGAACTCGAAATCAGCTGCGCCAAGGAAGGAGGAATCTCCGGCAGCGGGCGGCGGAGGAGGTTGCGCCGCCGCCACAAACGAGTAG
>Zm00001d043431_T001
ATGGGCATCGACCTCAACATGGCGGACGGCGAGAGCCAGGAGCGCCGCCCGCCGCCGGCGGTGTGCCGGGAGCTGTGGCACGCGTGCGCGGGGCCCGTGGTTGCGCTACCGCGGCGGGGCAGCCTGGTCGTGTACCTGCCGCAAGGCCACCTAGCCGCGGCCGGCGGCGGCAACGTCGCTGTGGACCTGCCGCCGCACGTGGCGTGCCGCGTCGCGGATGTCGAGTTATGCGCGGATGCGGCGACGGACGAGGTGTACGCGCGGCTGGCGCTGGTCGCGGAGGGCGAGGCATTTGGGAGAAATCTGCGTGGTGGTGGAGTCGATGGGGACGATGACATGGAGGATTTTGATGTTGAAAGGAAGTCCCGGATGTTGCACATGTTCTGCAAAACGCTTACAGCCTCTGACACAAGCACACATGGAGGGTTCTCTGTTCCTCGTCGTGCTGCTGAGGACTGTTTCCCGCCTCTGGATTATAATCAGCTCAGGCCTTCTCAAGAGCTGGTTGCCAAGGATTTGCATGGAGCCAAGTGGAAATTTCGTCATATATATAGGGGTCAGCCTCGTAGGCATCTCTTGACTACTGGATGGAGTTCATTTGTCAATAAAAAGAAACTGGTTTCTGGGGATGCGGTCTTATTTCTCCGAGGTGATGATGGTGAACTAAGGCTGGGCGTACGGAGGGCCATTCAGCTTAAAAATGAGGCCCTTTTTGACGATTTCAGTTGCGACAGTACAAAACGGCATACATTGTTGGCTGTAGCTGATTCCTTGAAGCACAAAAGTGTTTTTCACATTTCTTACAATCCAAGAGCTACTGCTTCAGAATATATTATACCACACCATAAGTTCCTGAAGAGCCTAAATCTTCCATTCTGTATTGGAGCAAGGATCAACTTACAGTGCCATAATGAAGATGTTAGTGAAAGGCGATCTGGAATGGTTGTTCATGTCAGTGAAATAGATCCCATGAAATGGCCAGGCTCGAAGTGGAGAAGCCTGCTGGTAAGATGGGAGGATGGTGTTGAATGTAACGGCCAAGATAGAGTATCTCCATGGGAGATTGAGATAGCTGGTGGCTCTGTCTCTGTTGCTCATTCTGTGTCCGCATCTAGCTCTAAAAGAACCAAGTTGTGTCCTCAGGGAAATTTGGACGTTCCAACAATGTATGTTACAGGGAATGGGAATGGTTGTACTGACTCCGTGGAAACTGGAAAGTTTCCCAGGGTCTTGCAAGGTCAAGATTTGATGAGTTTTAGGACTCGTCATGTTCCGTCTGCTCCTCAAACTGTTGAGGCTGCAAAACTTCAATCTTCTGGTGCTAGTAGGTTCCTCAGTAATGCACGTGGCTGCGCATTGGGTGGTCCAACAAGCAGACTCGCAGTGCATAACTCTGATTTTACCTACCAATCTGTAGGCTTCAATGAATCTATTGGATTCTCAGAGGTCTTGCAAGGTCAAGAAATTTCTCGGGCAGTTCCTATGTTCCAAGGAATGATGTCTGAGGCTTGTTCACTAAAAGGAGGATATGGGCTGCATAGTTATATGCGTACCCCAGTTGCTGTTACTGGATTGTCAGCCACAACTCAAGAGTGTTCTCTCACACTATCTACTCCGCCAGGAGCACAAGTTCCTTCTGTCTACCCTGATAATATTTTTAACCGAACTGTGGTTCGACAGCTTGGACTGGCAAGCAAGTTTGATGGTGGAGCTACAAATGCCCAGCAGTCTGTCCCATTTGATAGGCCGAGGGAAATTTGGAGCAAGCCACAGCATGAAATATCTGATCAAACGAAAATGGATCACTTTGAGACTAGAAGAGCTTCAGCACCTGGAGATGATGCTGCTAAGCATGGGTCTGGTGGAGAGGTGGTTCGCAAAACTAGCTGCAGACTTTTTGGTTTCTCGTTGACTGAGAAGATCTTGCCAGCAGATGATGATGGCATCAAGGAAGTGACCTATGAGCCTGAGTGCCAGAATCCACGGATGCTGGACCTGTTCGGGTACAACTGCTCAGCCCCAAGTGCTGCTCTTCCAGCTCTGTGTGCTGCCCCCTTTGGAATGTGA
>Zm00001d043922_T001
ATGGCGGGCATCGACCTCAACACCGTGGAGGAGGAGGACGAGGAGGAGGCGGAGGCGCTGCCTTTGCCCGGACCCGGTGGCCGTGGCGCCGTGTGCCTGGAGCTGTGGCACGCGTGCGCGGGCCCCGTCCCGCCGCTGCCGCGGAAGGGCAGCGCCGTCGTGTACCTGCCGCAGGGCCACCTCGAGCACATCGGCGGCGACGCGGCGCGAGGAGCAGCAGCTTCGGCGGTGCCGCCGCACGTGCTCTGCCGCGTCGTCGACGTCACCCTCCACGCGGACGGCGCGACAGACGAGGTGTACGCGCGGGTGTCGCTGCTGCCCGAGGACGAGGACGCGGAGAAGCGGGCGCAGGCGCAGGCGCGGGTCCGGGAGGACGAGGACCGCCGCGACGGCGAGGACGGCGGCGCCATGAGGCCGCTCGCACGGACGCCGCACATGTTCTGCAAGACGCTCACGGCATCCGATACCAGCACGCACGGCGGTTTCTCAGTGCCGCGCCGCGCCGCCGAGGACTGCTTCCCGCCGCTGGACTACAGCCAGCAGAGGCCGTCTCAGGAGCTCGTGGCCAAGGATCTACACGGCACGGAGTGGAAGTTCCGGCATATCTATCGAGGTCAGCCACGAAGGCATCTCTTAACCACTGGATGGAGTGCATTTGTTAATAGGAAGAAGCTCATTTCTGGAGATGCAGTTCTCTTCCTTCGAGGCGAAGATGGAGTGCTTCGACTGGGAGTGCGCCGAGCAGCCCAGCTAAAAATTGTAACTCCTATTCCTGCACCTCATAACCAGTGCTCAAGTAATAGCAATCTTGGAAACGTTGCACAAGCTGTGGCCACGAAGACTGTTTTCCACATCTACTACAATCCCAGGTTAACTCAATCTGAATTCATTGTACCCTATTGGAAGTTCACAAGAAGCTTCAATCAACCAATTTCTGTTGGAATGAGGTGCAGAATGCGATATGAAAGTGACGATGCTTCTGAAAGAAGGTGCACTGGTATAATAATTGGAAGCAGAGAAGCTGATCCTATATGGTATGGTTCGAAATGGAAATGCTTGGTGGTTAGATGGGATGATGGTATAGAGTGCCGTTGGCCCAATAGGGTATCTCCTTGGGAGATTGAGCTCACAGGATCTGTTTCAGGATCTCAAATGTGCGCTCCCAGTTCAAAACGTCTGAAACCATGCCTCCCCCAAGTTAATCCGGAGATTGTGCTTCCAAATGGAAGTGTTTCTTCAGATTTTGCGGGATCTGCCAGATTCCACAAGGTCTTGCAAGGTCAAGAATTGTTGGGTTTCAAAACCCATGATGGTCCTGCTATTTCTGCTTCTCAGGCAACTGAAGCAAGAAATTTGCAGTACAGTGATGAACGGAGTAACAATAACTTAGGGATCCCAAGACTTGGTGTTAGGTCTCCAACTGGAATCCCTGGGTTTCCCTACCATTGCTCAGGCTTTGGGGAATCTCAAAGATTCCAAAAGGTCTTGCAAGGTCAAGAAGTGTTTCATCCTTTCCGAGGAGGATGTTTGGCTGATGGCCATATAAGAACTGCTGGCATGTATCAACCTGACGGTAGGCATGTATCTGGTGCAGCTTATAAATGGTCTGCACCACAAGGGTATGATTTCCCACAGCCAGCAAAACCGGTTTTTCTGTTGCAAGAATCATCCCCATCATCTGTGATGATGTTTCCACAAACTAGATCTAAGATAACTCACTTGGAATATGAGTACTCAAGACATGAGGATGGTAGACTTGATAGGACTGTTCCTACTCAAGACATGGGAAGAAGCAATCAAACATTATCTCTTTGGCCTCATCTTGTTTCAGGCGAAGCAATAGAAGAATGTACTGGAACTGTGAATATGCACTCCCCCGTCAGTGGTGCAGAGCATGAATCAAACAATGAGAGTACAGTTGAAAATGGCTGCAAAATCTTTGGTATCTCATTGGCTGAAAAGATCCGATCATGCGATGAAGCAGACTCTTGTAGTGCAAAATGTAATTCTCGGCTCCAGCCTTTGAAGTCACAAATGCCAAAATCGCTAGGCAGCTGTTGGGCCACTGTTCACGAGCAAAGGCCTGTTGTTGGCAGGGTGGTTGACGTCTCGGCGACAGATATGTGA
>Zm00001d045026_T001
ATGAAGGATCACGGATCGGGCGGCGTCACTCCCAGCCCCGCAGAAGGGGAAAAGAAACCCATCAACTCGGAGCTGTGGCACGCTTGTGCGGGGCCCCTGGTGTCGTTGCCCCCGGTGGGCAGTCTCGTCGTATACTTCCCGCAGGGCCATAGTGAACAGGTGCGGGATTTACCAGTGTGCAGCAGGACTGCAGGAGTTGCTGCTTCAATGCATAAGGAGCTGGACACCGTCCCCAGCTACCCATCTCTGCCTTCTAAGTTGATCTGCAAGCTCCTAAGTCTCACCTTACATGCAGATTCTGAAACTGATGAAGTTTATGCCCAGATGATGCTTCAGCCTGTGAACAAATATGATCGAGACGCAATGCTGGCATCTGAACTGGGTCTGAAACAAAACAAGCAACCAACAGAATTCTTTTGCAAGACGTTGACAGCAAGCGACACAAGTCAACCGAAGAGGCATCTTTTGACAACTGGTTGGAGTGTCTTCGTCAGTACAAAAAGGCTGTTAGCCGGTGATTCAGTTCTCTTTATAAGGGACGAGAAATCTCAACTTCTCTTAGGTATAAGGCGTGCTAGCAGACCCCAACCAGCTCTGTCATCATCAGTTTTATCAAGTGACAGCATGCACATTGGAATCCTTGCAGCAGCAGCCCATGCTGCCGCAAATAGTAGCCCATTTACTATTTTCTATAACCCAAGGGCAAGCCCATCAGAATTTGTCATCCCTTTAGCAAAATACAATAAGGCTTTGTATACACAAGTGTCCCTTGGAATGCGATTCAGAATGCTCTTTGAGACAGAGGATTCAGGGGTAAGAAGATACATGGGCACGATCACAGGCATTGGCGACTTAGATCCACTGCGATGGAAGAATTCTCATTGGCGAAACCTTCAGGTTGGTTGGGATGAATCGACTGCATCTGAGAGGCGCACCCGTGTTTCGATATGGGAGATTGAACCAGTTGCTACACCATTTTATATATGCCCACCACCATTTTTCAGGCCAAAGCTTCCTAAGCAAGCAGGAATGCCAGATGATGAAAACGAGGTTGAGAGTGCTTTCAAAAGAGCGATGCCATGGCTTGCTGATGACTTCGCTCTGAAAGATGTCCAAAATGCATTATTTCCAGGCCTGAGCCTAGTTCAATGGATGGCTATGCAGCAAAATCCTCAGATGCTAGCAACTGCTTCCCCTGCTGTACAGTCGCAGTACTTGACCTCTAATGCACTGGGTATGCAGGATGGGATAGGCAGTGTCAGTGAAGATCCAACAAAAAGATTGACTATGCAGGCCCAAAATATTGGCTTACCTAATTTACAGGCTGGTTCGAAAGTGGACCACCCTGCAATTACCCCATTAGCTCAACACCAGCAACAGCCTCACCATGTATTGCAACAACAGCAGGTCCAACCACTGCAGCAAAGTTCTGCGATCCTACAGCAACAGCAAGCCCAGTTGTTGCAGCAAAATGCCATTCACTTGCAGCAGCAGCAAGAACAACTCCAACGGCAACAATCACAGCCGCAGCAACAGTTCAAAGCTACTGCATGTCTTCAGTCATCGGATCAGCACAAGCTGAAAGAGCAACAGCCTTCAGGTGGACAAGCTGCCTCACAAGTACATTTGTTAAACCAGATTTTGCAACCATCTTCATCTCAGCTACAACAGCTGGGTTTACCCAAGTCACCTACTCAGCGCCCAGGGTTACCAAGTCTAACAACAATGGGTTCTTTGCAGCAGTCACAATTACCTCAGACTCCACAGCCGCAACAAACAGCAGAATACCACCAGGCACTCCTACAAAGTCAACAACCCCAACTACAACAGCTATCACAATCAGAACTGCAGCTGCAGCTGCTTCAAAAGATTCAACAACAAAATCTGCTATCTCAACTGAACCCACAGCATCAGTCCCAGCTGATCCAACAATTGTCTCAGAAAAGCCAGGAAATTCTCCAGCAACAAGTTCTTCAACATCAGTTTGGTGGTGCTGATGCCATGGGTCAGCTCAAACATTTACAGCAAACACCTTTGAACCATAATACAGGATCCTTGCCACCCCAGCAACTTGTAAGATCACACTCAGCACTCACTGAGAGCGAAGAACCTTCCAGCTCAACAGTTCCATCTGGCAGCCGTATCTCCCCAATAAATTCATTTAGTAGAGCAAACCAAGGAACCAGAAATTTGCCTGAGATGCCAGCAACACCGCACATTGAGCACTTACTTCAGGAAATTCAAAGTAAGACAGATAATCGAATCAAGAATGATATACAAGGTAGTAAGGAAACGGTCCATGCACCTAATCGTCATCTAGCTTCAGATCAACTTGATGCGTCATCTGCTACCTCCTTTTGCTTAGATGAGAGCCCACGAGAAGGCTTTTCCTTTCCTCCAGTTTGTTTGGATAACAATGTTCAAGTTGATCCAAGAGAGAATTTTCTTATTGCGGAAAATGTGGACACATTAATGCCTGACGCCCTGTTGTCAAGAGGGATGTCGTCTGGAAAGGGTATATGCAATCTACCTTCTGGACAAAGGGATCATAGGGATGTGGAAAACGAGCTATCCTCTGCTGCATTCAGCTCCCAGTCATTTGGTGTGCCGGACATGTCTTTTAAGCCTGGATGTTCAAGTGATGTTCAAAAGCGTGGATCCGTTGGGAGATCAATTGATATAACACGGTACCGAGGTTACGAAGATCTTCGGCATGATCTTGCATGCATGTTCGGTATTCAAGGGCAGCTTGAAGATCCCTACAGGACGGACTGGAAGCTGGTCTATGTTGACCACGAAAATGACATCCTCCTTGTTGGCGACGACCCATGGGAGTACGTTCCTACTTCTGTTTCCTTCATCTCTTCCGTACATCCTTACCACGGTGTTCCCTTAACCTGTTCCGCTTCTGATGTTTTGAAAATCCTGCCTCGTCCAGGGAGTTTTTTAGTCGGGCACACAATAACGCTTGAAAATGTTTACTATCGTAGTCACCTAGGCGGAAATGCAGAGTTAGCGTGCAATCGTGCATTCTGGGATATGTTTCGCAGTTTGTCAGGCTGA
>Zm00001d049295_T001
ATGACTTCTTCGGCGGCGGCCGCGGCTGCTGCCGCCCAGGTGGCGGGAGGAGGTGGAGGCGGCGAGGGAGATGCCGCCGCTGCGGCGCGAGGCGGAGGCGGAACGGAGGACGGCATGTACACGGAGCTGTGGAACCTCTGCGCCGGCCCGCTGGTCACGGTGCCCAGGGTCGGGGACAAGGTGTACTACTTCCCGCAGGGCCATATCGAGCAGGTGGAGGCGTCGACCAACCAGGTGGCTGAGCAGCACATGCAATTTTACGATCTCCCGTGGAAGATCCTGTGTGAGGTCATGAACGTTGAATTGAAGGCTGAGCCAGACAATGATGAGGTTTATGCCCAGCTCACTCTGCTACCTGAATCAAAGCAGCCAGAGGAGAATGGCTCTAGTGAGGAGATGCCTGCTTCACCTCCTGCTGCACTTGCAAGGCCACGCGTGCACTCCTTCTGCAAGACATTGACAGCCTCTGATACCAGCACTCATGGTGGATTCTCGGTGCTGCGGCGCCATGCAGATGAGTGTCTTCCGCCACTGGATATGACCCGTCAACCTCCAACACAAGAGCTTGTAGCCAAGGACCTGCATGGTGTGGAATGGCGCTTTCGCCACATATTCAGAGGTCAACCACGAAGGCATCTTTTGCAGAGTGGCTGGAGTGTTTTTGTTAGTGCCAAACGTCTTGTTGCTGGCGATGCCTTCATCTTTCTAAGAGGTGATAGTGGGGAGCTTCGTGTAGGAGTCAGGCGTGCCATGAGGCAGCAAGCAAATGTTCCGTCTTCAGTAATATCAAGCCACAGCATGCATCTTGGTGTTCTTGCTACAGCATGGCATGCTGTTAACACTGGGACCATGTTTACTGTCTACTACAAGCCTAGGACAAGTCCAGCTGAGTTTGTTGTTCCCTGTGATCGCTATATGGAATCACTGAAACGAAATTACCCTATAGGGATGAGATTTAAAATGAGGTTTGAAGGTGAAGAGGCTCCAGAACAAAGGTTCACTGGGACCATTGTTGGAAATGTGGATCCTGATCAAGCTGGATGGGCTGAATCTAAATGGCGTTACCTCAAGGTGAGGTGGGATGAAGCTTCCTCCATTCCACGTCCTGAAAGGGTTTCTCCCTGGCAAATAGAACCTGCAGTCAGCCCTCCCCCTATCAACCCACTTCCAGTGCACAGACCCAAGAGACCTCGCTCTAATGCTGTAGCTTCTCTGCCCGAGTCTTCAGCTCCAACAAAAGAAGGTTTGACTTCATCGTGCGTGCAAAACTTGGTAGGATGTATGGTAATTTTACTAATGCATGTGTTTTACCCCATTCTAGCTGCTCCAAAGGTCACATTAGAGACTCAACAACATGCCCTGCAAAGGCCCTTGCAGACCCAGGATAATGTGGCCCCGAAAAGTGTTTTTGGTGATAACAGTGAATTGGACTCTGCTCATAAGTCCTCCCTGCGACCGTCAGGTTTTGATCTGGACAAGAGCACCATTGGCATGCAGAGGAAGCTGGGTTCAGATATTTGGATGCGAATGAACAGACCTGATGGTTACAGTGAAATGTTATCGGGATATCAACCACCTAATGAAGGTGCACGGAATTCGCAGGGTTTCTGTTCTTTACCTGATCAGATTGCCGCTGGACGTCCTAATTTCTGGCACACTGTAAACGCTCATTACCAAGACCAGCAAGGCAATCACAATCTGTTCCCTGGTTCATGGTCCATGATGCCTTCAAGTACTGGCTTTGGGATGAACAGACAGAGCTATCCAATGATCCAGGAAGTCGGTGGGATGTCTCAGAGTTGTACAAACACCAAGTTTGGGAATGGAGTTTATGCTGCACTACCTGGCCGAGGCATTGATCGATACCCATCTGGATGGTTTGGGCACACGACACCCGGTGGTCGCGTGGACGATGCCCAGCCACGCGTGATTAAGCCTCAACCTTTGGTCCTTGCTCACGGCGAAGCTCTGAAAATGAAGGGCAACTCGTGCAAGCTTTTTGGAATCCATCTCGACAGCCCAGCCAAATCTGAACCTTTGAAGTCTCCGCCAAGCGTTGCCACACCGGCAGCTGAGAAGTGGATGGCAGACGGAATCGACGCAGACAAAAGCCCTGAGCCGCACAAGACGCCAAAGCAACTCGGTGCTACACAGGTGGATCCTGTCCCAGAGAGATGCCCACAAGCTTCAAGGGGCACACAGTGCAAATCACAAGGCGGGTCGACTAGGAGCTGCAAGAAGGTCCACAAGCAAGGAATGGCGCTGGGCAGGTCCGTGGACCTTACCAAGTTCAACGGCTACACGGAGCTGGTGGCGGAGCTGGACGAGATGTTCGACTTCAACGGCGAGCTGAAAGGCTGTAGCAAGGAGTGGATGGTCGTGTACACCGACTACGAAGGCGACATGATGCTGGTCGGGGACGACCCCTGGAATGAGTTCTGCAGCATGGTGCACAAGATCTTCGTGTACACGAGGGAGGAGGTCCAGCGCATGAACCCGGGCGCCCTGAACTCGAGGCCGGAGGACAGCGGCCTCGCCAATTCGACGGAGAGGGGCTCCGCATCTACTGCTGCTGCTAGAGAGGCACCCGGCTACCAGTCCGCCTCGTCGCTTAACTCCGACAACTGCTGA
>Zm00001d050781_T001
ATGGCGAGCGCCGGCGTGGCGGGCTGCTCAGGGAGTGCTGGCGATGCTTTGTTCAGGGAACTCTGGCATGCTTGTGCTGGGCCGTTGGTCACAGTGCCTCGCCAAGGCGAGCTGGTTTACTACTTCCCACAGGGTCATATGGAACAGCTTGAAGCATCTACAGATCAACAACTTGATCAGCACTTACCTTTGTTTGATCTACCACCCAAGATTCTCTGCAAGGTGGTCAATGTAGAACTTAGAGCTGAAACTGATTCTGATGAAGTTTATGCTCAAATTATGCTGCAACCAGAAGCAGATCAAAGTGAGCCCACCAGCCCAGATTCTGAGCCACCGGAGCCTGAAAGATGCAACGTCTATTCCTTCTGCAAGACCTTGACTGCTTCAGATACAAGTACCCATGGTGGATTCTCTGTCCTCAGGAGGCATGCTGAAGAATGTTTGCCCCAACTGGACATGACTCAGAATCCACCATGGCAAGAACTGCTGGCTAAAGATCTCCATGGAAATGAATGGCATTTCCGTCACATCTTTCGAGGGCAACCAAGGAGGCATCTACTTACGACAGGTTGGAGTGTTTTTGTTAGCTCAAAAAGATTGGTTGCTGGTGACGCGTTTATCTTTTTGAGAGGTGAGAACGGAGAGCTGAGAGTTGGGGTAAGGAGGCTCATGAGGCAACTAAATAACATGCCATCTTCGGTTATCTCAAGCCACAACATGCATCTTGGAGTCCTAGCAACTGCATCTCATGCCATCTCCACAGGAACTCTCTTTTCTGTTTTCTACAAACCTAGAACAAGTCGATCGGAATTTGTCGTTAGTGTAAATAAGTACCTTGAAGCTAAGAATCACAAGGTGTCTGTTGGCATGAGGTTTAAAATGAGATTTGAGGGTGATGAATCTCCTGAAAGAAGATTAAGTGGGACAATTATTGGTCTGGGAAGCATGCCAGCTAACTCAACTTCTCCATGGGCTAACTCTGATTGGAGATCTTTGAGGGTCCAATGGGACGAGCCTTCTGCTATTCTGCGTCCAGATAGAGTTTCACCATGGGAACTAGAACCCCTTGATGCAACTAATCCACAACCACCTCAACCTCATTTACGGAATAAGCGTGCACGACCCCCTGCTTTACTTTCTATTGCTCCAGAACTTCCTCAAGTTTTTGGTTTTTTGAAATCCCCAGCTGAGCCTGCCCAAGCTTTCTCATTTTCAAGACCGCAGCAAACTCAGGAATTATACCATTCAAATCCCAGTTCAATCTTCTCATCATCGTTGAATGTAGGATTCAGTTCAAAGAATGACCGTTCTACTCCAATCAACAGTCATTTGTACTGGACAATGAGGCAGACAAGAACTGAATCCTACTCTGCTAGCATTAACAAAGCTCCTACTGAAAAGAAGCAAGAATCTGCTACTTCTGGCTGCAGATTGTTTGGCATTGAGATAGTGGCAAGCAGCGAGCGCTCTCTTAACGAGTCAGAGAGCCGGCAAGTCAGGAGCTGCACCAAGGTAATCATGCAAGGAATGGCGGTTGGCAGGGCAGTGGACTTGACAAGGTTAGATGGGTATGCTGATCTCCACCGCAAGTTGGAGGAGATGTTTGATATCCAGGGAGAGCTTTCTGCCAACCTCAAGAAATGGAAGGTCATTTACACAGATGACGAGGATGATACGATGCTGGTCGGGGACGATCCATGGAATGAATTCCTCAGGATGGTAAAAAGGATATACATTTACTCTTACGAGGAGGCCAAGTCTTTGACTCGCAAGGCGAAGCCGCCGGTTGTTGGTGACACCATCAAGCCAGACCCAAACAAATTGCCACCGGAATCTGACGTGCCACATGACTCAAACAACAATGCTCCCGTTGCTGCTGATTATCAGGACTGA
>Zm00001d051172_T001
ATGATCACGTTCGCGGACCTGACGGAGCCGGCAGCGGCCGGCGCCGAACGGTGCGTGGACCGGCAGCTGTGGCTGGCGTGCGCGGGCGGCATGTGCACCGTGCCGCCCGTGGGCGCCAGCGTCTACTACTTCCCGCAGGGGCACGCGGAGCACGCGCTCGGCCTCGCCGGTGCGGCCGACCTCTCCGCGGCGCGCGTCCCGGCGCTGGTCCCCTGCCGCGTCACGGCAGTGCGCTACATGGCTGACCCAGACACCGATGAGGTCTTCGCCAGGATCCGCCTCGTCCCGCTGCGCGGCGGGGACGCGGACGCGGACGCGGGTGGCGTCGAGGACGACGCGGCCGCGGCGGACGAGCAGGAGAAGCCGGCCTCGTTCGCCAAGACGCTGACACAGTCCGACGCCAACAACGGCGGCGGGTTCTCCGTGCCGAGGTACTGCGCGGAGACGATCTTCCCGCGGCTGGACTACGCCGCCGACCCGCCCGTGCAGACCGTCGTCGCCAAGGACGTGCACGGGGCCGCCTGGAAGTTCCGCCACATCTACCGGGGCACGCCGCGCCGGCACCTGCTCACCACGGGGTGGAGCACGTTCGTCAACCAGAAGAAGCTCGTCGCAGGGGACTCCATCGTGTTCCTCCGCGGCGACAGCGGGGACCTGCACGTCGGCATCCGGCGTGCCAAGCGCGGGTTCTGCGGCGCCGGTGGAGGCGGAGGCGACGACTCCCCTGCGGCCGGGTGGGACCATTACGCGGGCCTCATGCGAGGGAATGTGAGCCCGTGCGCGGCCGCCAAGGCACGGGGCAAGGTGCGACCAGAGGACGTGGCCGAGGCGGCGAGGCTGGCGGCCGCCGGGCAGTCGTTTGAGGTGGTGTACTACCCTCGCGCCAGCACGCCCGAGTTCTGCGTTCGCGCCGCCGCGGTCCGCGTGGCGATGAGGGTGCAGTGGTCCCCAGGGATGCGGTTCAAGATGGCGTTCGAGACCGAGGACTCCTCCAGGATTAGCTGGTTCATGGGCACCGTCGCCGGCGTCCAGGTCACCGATCCCATCCGCTGGCCGCAGTCGCCTTGGCGCCTTCTTCAGGTGACCTGGGACGAGCCGGACCTCCTGCAGAACGTGAAGCGGGTGAGCCCATGGCTGGTCGAGCTGGTGTCCAGCATGCCGGCCATCCACCTCGCGTCCTTCTCGCCTCCGCGCAAGAAGCCCCGGATCCCGGCGTACCCGGAGTTCCCCTTCGAAGGGCAGCTCCTGAACCCGGCGTTCCCGCCCAACCCACTGCCGCACGGCCAGCACCACCACCATTTCCTTCACTCCCACTCCCACCAGCACCACCACCCACCCTTCTTCCCGTTCCCGGCCGGCAGTGCTCCTGCAGCCATACAGGGAGCCAGGCATGCGCAATTCGTTCCACCTTTCTCAGAACTCCACCTCACCCACTTGCAGCCGAGCCTGCTGTACCCCAGGCTCCGCCGTCCCGACCATGTCGGTCCGACGACCCCGATCCCGGCAAGAGTCAGCACGGACCTGACCATCGGAGGCGCGGCGGCGGCGGCGCGCGACGACGACGACGACGACTTCCCGTGCGCTCCTCCGTCGACGGGTGCCAACAGGCAGAAGCCCGACGCCAAGCCGGCGGGGCTAGTGCTCTTCGGACGCACGATACTAACCGAGCAGCAGATGAGCCGCAGCGGCGCAACCTCCCCAGCGGCGACCGGCAACAGCTCCACGTGCTGGAACGCCGAGAAGGGGCCCAACGCCTCGGAGGGCTCGGGGGGATCCGGCGTCATCCAGACCAGCCCGGCCAAGGCCGCGTCGTCGGAGCGGCCGCCGTGGCTCGGGGGCGACGGCAGCCAGCAGCAGCAGGCCTCCGGCGAGCTCGGGCTGGGGCTGGAGCCCGGGCAGTGCAAGGTGTTCGTGGAGTCGGACACGGTGGGCCGCAACCTCGACCTCGCGGCGCTGCGCTCGTTCGACGAGCTGTACGGCCGGCTGTCCGGGATGTTCGGCGTCGCGGGGGCGGAGCTGCGCAGCCGCGTGCTGTACCGCGGCGCCGCCGGCGACGAGCCCTTCAGCGATTTCGTCAGGTCGGCGCGGAGGCTCACCGTATTGACCGATGCTGGGAGCGACAACCTTGGAAGCTAA
>Zm00001d053819_T001
ATGAAGCTCTCGCCGTCGGCCAGCGGTGGCCTCCAGGACCAGCCGGCGTCGCCGGAAGAAGCTGAAGAGCACAAGTGCCTGAATTCTGAGTTGTGGCATGCATGTGCTGGCCCTCTAGTTTCATTGCCTTCGGTCGGTAGTCGAGTGGTGTATTTTCCTCAAGGCCACGGTGAGCAGGTAGCAGCATCAACAAATAAGGAAATGGAGGCTCAGATCCCCAACTATCCTAGTCTACCTCCGCAGCTTATATGCCAACTGCATAATGTGACTATGCATGCTGATGCTGAGACAGATGAGGTGTATGCACAGATGACACTCCAGCCACTCAGTCCACAAGAGCTCAAGGACCCATTTTTGCCTGCTGAGTTAGGCACTGCCAGCAACCAGCCAACAAATTATTTTTGTAAAACACTAACTGCAAGTGATACGAGTACACATGGTGGGTTCTCTGTTCCACGCCGAGCAGCTGAGAAGGTGTTTCCTCCACTGGATTTCAATCAGCAACCTCCCGCACAGGAGTTGATTGCAAAAGATCTTCATGGCAACGACTGGAAATTTCGCCATATTTTTCGAGGTCAGCCAAAGCGGCATCTTCTGACAACAGGTTGGAGTGTCTTTGTTAGTGCAAAGAGACTGGTTGCTGGCGACTCTGTCCTTTTTATCTGGAATGACAACAACCAGCTGCTTCTGGGAATTCGCCGGGCAAACAGACCACAAACCGTCATGCCATCATCAGTACTTTCTAGTGATAGCATGCATATTGGCCTGCTCGCTGCTGCAGCTCATGCTGCATCAACAAATAGCCGGTTTACTATCTTCTATAATCCAAGAGCAAGCCCTTGTGAATTTGTCATACCCATGGCTAAGTATGTGAAAGCTGTGTACCATACCCGTATATCTGTGGGCATGCGTTTCCGGATGCTTTTTGAGACGGAGGAATCTAGTGTAAGGCGTTATATGGGGACAATTACAGGAATAAGTGATCTTGATCCTGTTCGCTGGCCAAACTCGCACTGGCGCTCAGTAAAGGTTGGATGGGACGAGTCAACTGCTGGAGAGAAGCAGCCAAGGGTATCTCTTTGGGAGATTGAACCGTTGACAACTTTTCCAATGTATCCATCTCCTTTTGCTCTTGGATTAAAGCGCCCATGGCCTGCAGGCCTGCCTTCTTTATACGGTGGAAGGGGTGATGGCTTGACCTCTTCTCTTATGTGGCTTCGAGACAGGGCAAACCCGGGTTTCCAGTCACTGAATTTCAGCGGGCTTGGTATGAGTCCCTGGATGCAGCCTAGGCTGGATAATTCCTTACTTGGTCTCCAATCTGACATGTACCAGACCATAGCAGCAGCAGCAGCATTACAAAGCACTACGAAGCAAGTTCCACCTTCAGCAATGCAGTTCCAACAGCCTCAGAACATTGCTGATAGATCTGCTCTTCTATCAAGTCAGATTCTGCAGCAAGTACAACCTCGGTTTCAGCAAATTTACCCTCAAAATCTCAACGAAAACAAAATTCAAGGTCATACACAACCTGAGTACCTCCAAGTCCAACAGCAGCTTCAACGCTGCCAATCATTTAATGAGCAGAAGCCTCCGATGCATCCACAGCAACAACAGCAGGAACCACAGCAGCAGCAATGCGTCCAAACACCACAGGATCAACAAATGCAAGAACAGAAGCATCTGCACAACTTCCACTCCTTGCCAGATGCATTATCGGCCTTTTCTCAGCTTTCCCCAGCCACTCACTCCCCACCTTCCGCATTGCAGACAGTTCCAGCATTCTCGCATCAACAAAACTTCCCAGATACAAACATTAGCTCTCTCTCACCATCTACTGGCCCTTCAATGCATGGCATGTTGGGGAGATTACCTTCCGAAGCAGCTTCGAGCCTCCCATGTGTGGCAATGAACGCCCCTGTATCGGTATCTGACCCATGGTCATCCAAGAGAGTTGCAGTGGAGTCTGTTAACCCTTGTCGACCTCATGTTTCACCACATATAGAACATTTGGATATGGCGACGTGTAACATGCCGCAGAGCTCTGCACTAGCACCATTACCTGGACGGGAATGCCTAGTGGATGAAGATGGGTGCTCTGATCCTCAAAATCACCTCTTGTTTGGTGTTCACATAGACTCGCATTCACTTCTGATGCAAGGGGGCATTCCAGCCCTTCAGAATGATAACAGTTCAGGCACTATTCCATACTCAACCTCCAATTTCCTGAGCCCTTCTGAGAACGATTTCCCCTTGAATCAACCGCTACGCAGCGCGGGCTGCTTAGATGAGTCGGATTATCTTCCATGTGCAGAGAATGCCGAACAGGCAAATCAACAGTTTGCAACCTTTGTGAAGGTTTACAAATCCGGGACCGTCGGAAGGTTGCTCGACATCACTAGATTCAGCAGCTACGACGAGCTCCGTAGCGAGGTGGGGCGTCTGTTTGGCCTCGAGGGCCAGCTGGAAGACCCTCTGAGATCAGGCTGGCAGCTTGTATTTGTTGACAGGGAGGACGATGTCCTTCTGGTTGGCGATGACCCATGGCAGGAATTCGTGAACAGTGTGTCCTGTATAAAGATACTTTCACCGGAGGAGGTCCAGCGGATGGGAAAGCCGGGCATCCAGCTCCTGAGCTCGGCTCCTTCAAGAAGGCTGGGCAATGGCTGCGACAGCTACGCGAGCATGCAGGAGCCGAGAGGCCTGGACGCTGGGATGGCGCCGGTGGGTTCGGTCGAGTTCTGA
>AT1G19220.1
ATGAAAGCTCCATCAAATGGATTTCTTCCAAGTTCCAACGAAGGAGAGAAGAAGCCAATCAATTCTCAACTATGGCACGCTTGTGCAGGGCCTTTAGTTTCATTACCTCCTGTGGGAAGTCTTGTGGTTTACTTCCCTCAAGGACACAGCGAGCAAGTTGCAGCATCGATGCAGAAGCAAACAGATTTTATACCAAATTACCCAAATCTTCCTTCTAAGCTGATTTGCTTGCTTCACAGTGTTACATTACATGCTGATACCGAAACAGATGAAGTCTATGCACAAATGACTCTTCAACCTGTGAATAAGTATGATAGAGAAGCATTGCTAGCTTCTGATATGGGCTTGAAGCTAAACAGACAACCTACTGAGTTTTTTTGCAAGACTCTTACTGCAAGTGACACAAGCACTCATGGTGGATTCTCTGTACCGCGTCGTGCAGCTGAGAAAATATTCCCTCCTCTTGATTTCTCGATGCAACCGCCTGCGCAAGAGATTGTAGCTAAAGATTTACATGATACTACATGGACTTTCAGACATATCTATCGAGGCCAACCAAAAAGACACTTGCTTACCACAGGTTGGAGCGTTTTTGTTAGCACAAAGAGACTATTTGCGGGTGATTCAGTTTTGTTTGTAAGAGATGAGAAATCACAGCTGATGTTGGGTATAAGACGTGCAAATAGACAAACTCCGACTCTTTCCTCATCGGTCATATCCAGCGACAGTATGCACATTGGGATACTTGCAGCTGCAGCTCATGCTAATGCCAATAGTAGCCCTTTTACCATCTTCTTCAATCCAAGGGCAAGTCCTTCAGAGTTTGTAGTTCCTTTAGCCAAATACAACAAAGCCTTATACGCTCAAGTATCTCTAGGAATGAGATTCCGGATGATGTTTGAGACTGAGGATTGTGGGGTTCGTAGATATATGGGTACAGTCACAGGTATTAGTGATCTTGACCCTGTAAGATGGAAAGGCTCACAATGGCGTAATCTTCAGGTAGGATGGGATGAATCAACAGCTGGAGATAGGCCAAGCCGAGTATCCATATGGGAAATCGAACCCGTCATAACTCCTTTTTACATATGTCCTCCTCCATTTTTCAGACCTAAGTACCCGAGGCAACCCGGGATGCCAGATGATGAGTTAGACATGGAAAATGCTTTCAAAAGAGCAATGCCTTGGATGGGAGAAGACTTTGGGATGAAGGACGCACAGAGTTCGATGTTCCCTGGTTTAAGTCTAGTTCAATGGATGAGTATGCAGCAAAACAATCCATTGTCAGGTTCTGCTACTCCTCAGCTCCCGTCCGCGCTCTCATCTTTTAACCTACCAAACAATTTTGCTTCCAACGACCCTTCCAAGCTGTTGAACTTCCAATCCCCAAACCTCTCTTCCGCAAATTCCCAATTCAACAAACCGAACACGGTTAACCATATCAGCCAACAGATGCAAGCACAACCAGCCATGGTGAAATCTCAACAACAACAACAACAACAACAACAACAACACCAACACCAACAACAACAACTGCAACAACAACAACAACTACAGATGTCACAGCAACAGGTGCAGCAACAAGGGATTTATAACAATGGTACGATTGCTGTTGCTAACCAAGTCTCTTGTCAAAGTCCAAACCAACCTACTGGATTCTCTCAGTCTCAGCTTCAGCAGCAGTCAATGCTCCCTACTGGTGCTAAAATGACACACCAGAACATAAATTCTATGGGGAATAAAGGCTTGTCTCAAATGACATCGTTTGCGCAAGAAATGCAGTTTCAGCAGCAACTGGAAATGCATAACAGTAGCCAGTTATTAAGAAACCAGCAAGAACAGTCCTCTCTCCATTCATTACAACAAAATCTGTCCCAAAATCCTCAGCAACTCCAAATGCAACAACAATCATCAAAACCAAGTCCTTCACAACAGCTTCAGTTGCAGCTACTGCAGAAGCTACAGCAGCAGCAACAGCAGCAGTCGATTCCTCCAGTAAGCTCATCCTTACAGCCACAATTATCAGCGTTGCAGCAGACACAAAGCCATCAATTGCAACAACTTCTGTCGTCTCAAAATCAACAGCCCTTGGCACATGGTAATAACAGCTTCCCAGCTTCAACTTTCATGCAGCCTCCACAGATTCAGGTGAGTCCTCAGCAGCAAGGACAGATGAGTAACAAAAATCTTGTAGCCGCTGGAAGATCACATTCTGGCCACACAGATGGAGAAGCTCCTTCTTGTTCAACCTCACCTTCCGCCAATAACACGGGACATGATAATGTTTCACCGACAAATTTCCTGAGCAGAAATCAACAGCAAGGACAAGCTGCATCTGTATCTGCATCTGATTCAGTCTTTGAGCGCGCAAGCAATCCGGTCCAAGAGCTTTATACAAAAACTGAGAGCCGGATCAGTCAAGGCATGATGAATATGAAGAGTGCTGGTGAACATTTCAGATTTAAAAGCGCGGTAACAGATCAAATCGATGTATCCACAGCGGGAACGACGTACTGTCCTGATGTTGTTGGCCCTGTACAGCAGCAACAAACTTTCCCACTACCATCATTTGGTTTTGATGGAGACTGCCAATCTCATCATCCAAGAAACAACTTAGCTTTCCCTGGTAATCTCGAAGCCGTAACTTCTGATCCACTCTATTCTCAAAAGGACTTTCAAAACTTGGTTCCCAACTATGGCAACACACCAAGAGACATTGAGACGGAGCTGTCCAGTGCTGCAATCAGTTCTCAGTCATTTGGTATTCCCAGCATTCCCTTTAAGCCCGGATGTTCAAATGAGGTTGGCGGCATCAATGATTCAGGAATCATGAATGGTGGAGGACTGTGGCCCAATCAGACTCAACGAATGCGAACATATACAAAGGTTCAAAAACGAGGGTCAGTAGGTAGATCAATAGATGTTACCCGTTATAGCGGCTATGATGAACTTAGGCATGACTTAGCGAGAATGTTTGGCATCGAAGGACAGCTCGAAGATCCGCTAACCTCTGATTGGAAACTCGTCTACACCGATCACGAAAACGATATTTTACTAGTTGGTGATGATCCTTGGGAAGAGTTTGTGAACTGCGTGCAGAACATAAAGATACTATCATCAGTAGAAGTTCAGCAAATGAGCTTAGACGGAGATCTTGCAGCTATCCCAACCACAAACCAAGCCTGCAGCGAAACAGACAGCGGAAATGCTTGGAAAGTACACTATGAAGACACTTCTGCTGCAGCTTCTTTCAACAGATAG
>AT1G19850.1
ATGATGGCTTCATTGTCTTGTGTTGAAGACAAGATGAAAACAAGTTGTTTGGTTAATGGTGGAGGAACTATAACAACAACAACATCTCAATCTACCTTGCTTGAAGAGATGAAGCTGTTGAAAGACCAGTCAGGTACAAGAAAGCCGGTAATAAACTCGGAGCTATGGCACGCTTGTGCAGGCCCTTTGGTGTGTCTCCCTCAAGTTGGGAGCTTAGTGTATTACTTCTCACAAGGTCATAGCGAGCAGGTTGCTGTTTCAACCAGAAGATCAGCAACAACACAAGTTCCTAATTATCCGAACCTTCCATCTCAGTTGATGTGTCAAGTCCATAATGTTACTCTTCATGCTGACAAAGACAGTGACGAAATCTATGCTCAGATGAGTCTTCAACCTGTTCACTCTGAGAGAGATGTGTTCCCTGTACCAGACTTTGGAATGCTGAGAGGAAGTAAGCACCCGACTGAGTTTTTCTGCAAAACACTTACTGCAAGTGACACAAGCACACATGGAGGTTTCTCAGTGCCACGTAGAGCTGCAGAGAAGCTATTTCCACCATTGGACTACTCAGCACAGCCGCCAACGCAAGAGCTTGTAGTTCGAGATCTTCATGAGAATACTTGGACATTTCGCCATATCTACCGAGGGCAACCAAAGAGACATCTCCTAACTACAGGATGGAGTTTGTTCGTTGGATCGAAGAGATTGAGAGCTGGGGATTCTGTTTTGTTCATCAGGGATGAGAAGTCACAACTTATGGTCGGTGTTAGGCGTGCCAATCGCCAACAAACAGCACTTCCTTCATCAGTTCTCTCAGCGGATAGTATGCACATCGGTGTTCTTGCTGCTGCTGCTCACGCAACCGCCAACCGTACTCCTTTTTTGATATTCTATAATCCAAGAGCTTGTCCAGCAGAGTTCGTGATCCCTCTAGCTAAGTACCGTAAGGCGATATGCGGGTCTCAGCTCTCAGTTGGTATGAGATTTGGAATGATGTTTGAAACTGAAGATTCCGGGAAACGAAGGTACATGGGAACTATTGTTGGAATCAGCGATTTGGATCCGTTGAGATGGCCTGGTTCTAAGTGGCGTAACCTTCAGGTAGAATGGGATGAGCCTGGATGTAATGATAAACCTACTCGGGTCAGTCCATGGGATATCGAAACACCTGAAAGTCTCTTCATTTTTCCTTCTCTGACCTCAGGACTCAAACGTCAGCTCCATCCATCTTACTTTGCTGGTGAAACTGAATGGGGTAGCTTGATAAAACGGCCACTTATACGTGTTCCTGATTCCGCGAATGGGATTATGCCATATGCATCTTTCCCTAGTATGGCTTCGGAGCAGCTTATGAAAATGATGATGAGGCCTCACAACAACCAAAATGTACCATCTTTCATGTCTGAGATGCAGCAGAATATTGTAATGGGGAATGGAGGTTTGCTAGGAGATATGAAGATGCAGCAACCCCTGATGATGAACCAGAAATCTGAGATGGTGCAGCCACAAAACAAGCTAACAGTGAACCCATCTGCTTCTAATACGAGTGGCCAAGAACAGAATCTTTCACAGAGTATGAGTGCTCCTGCTAAACCTGAGAACTCTACACTCTCTGGTTGCAGCTCTGGTAGAGTCCAACATGGACTTGAGCAGTCAATGGAACAGGCAAGCCAGGTTACTACATCCACAGTGTGTAATGAGGAAAAGGTTAATCAGCTACTTCAGAAACCGGGTGCTTCGTCGCCTGTACAAGCTGATCAATGTCTTGACATTACTCATCAGATTTACCAACCACAGTCTGATCCAATAAATGGATTCTCTTTCCTGGAAACTGATGAGCTGACATCACAAGTCTCTTCCTTCCAGTCTCTTGCCGGATCATACAAGCAACCATTCATTCTATCCTCCCAGGATTCTTCAGCTGTTGTGTTACCGGATTCCACAAACTCACCGCTGTTTCATGATGTGTGGGACACTCAGTTGAACGGTCTCAAGTTTGACCAGTTCAGTCCCTTGATGCAGCAGGACCTTTATGCTAGTCAGAATATCTGTATGAGTAATAGCACAACCAGTAACATTCTAGATCCTCCACTCTCAAACACAGTCCTTGATGACTTCTGTGCCATCAAAGACACTGATTTCCAGAACCACCCTTCTGGTTGTTTGGTTGGAAACAACAACACTAGCTTTGCTCAAGATGTCCAGTCGCAGATCACATCAGCTAGCTTTGCAGACTCACAGGCCTTCTCTCGCCAAGATTTTCCAGATAATTCTGGAGGCACTGGTACATCTTCAAGCAATGTTGATTTTGATGATTGTAGTCTGCGGCAAAATAGTAAAGGCTCATCATGGCAGAAAATTGCGACACCCCGCGTCCGAACCTACACTAAGGTTCAAAAAACCGGGTCAGTCGGGAGATCAATTGATGTCACAAGCTTTAAAGACTACGAGGAGCTAAAATCTGCTATCGAATGCATGTTTGGATTGGAAGGACTACTAACTCACCCACAAAGCTCGGGTTGGAAGCTTGTATATGTTGATTATGAGAGTGATGTTCTGCTTGTAGGAGATGATCCATGGGAAGAGTTTGTGGGATGCGTAAGGTGCATAAGGATATTGTCGCCAACTGAGGTCCAGCAGATGAGTGAAGAAGGGATGAAGCTTTTGAACAGCGCAGGCATTAACGATCTTAAGACTTCTGTTTCATAA
>AT1G30330.2
ATGAGATTATCTTCAGCTGGGTTTAATCCTCAACCTCATGAAGTTACAGGAGAGAAAAGAGTTCTTAATTCTGAGCTCTGGCATGCTTGTGCTGGTCCTCTTGTCTCACTACCTCCTGTTGGAAGCAGAGTTGTGTATTTTCCTCAAGGTCACAGTGAACAGGTTGCTGCTTCGACCAACAAAGAAGTAGATGCTCATATACCAAATTATCCGAGCTTGCATCCGCAGCTTATCTGTCAGCTTCATAATGTTACAATGCATGCTGATGTGGAGACTGATGAAGTCTATGCACAGATGACTTTGCAACCGTTGAATGCGCAAGAGCAAAAAGATCCTTACCTTCCCGCGGAATTAGGTGTCCCAAGTAGACAGCCTACAAACTATTTCTGTAAAACTCTGACTGCTAGTGATACAAGCACTCACGGAGGTTTTTCTGTACCTCGCCGAGCTGCTGAGAAAGTTTTCCCTCCCTTGGATTACTCGCAGCAGCCACCAGCTCAAGAGTTAATGGCGAGGGATCTGCATGATAATGAATGGAAGTTCAGGCATATTTTCCGAGGCCAACCAAAGAGACATCTCCTTACCACGGGTTGGAGCGTATTTGTGAGTGCTAAAAGGCTTGTTGCTGGTGACTCTGTTCTTTTCATCTGGAACGATAAGAATCAATTACTTCTTGGTATAAGACGAGCCAACCGACCACAAACTGTCATGCCTTCATCTGTTTTGTCAAGTGACAGTATGCATTTAGGCCTTCTTGCTGCAGCAGCTCATGCTGCCGCTACAAACAGCCGATTCACCATCTTCTATAACCCGAGGGCGAGTCCATCAGAGTTTGTTATACCCCTGGCTAAGTATGTGAAAGCGGTTTATCACACTCGCGTCTCTGTTGGTATGCGGTTTAGGATGCTGTTTGAAACTGAAGAATCTAGTGTTCGTCGGTACATGGGTACAATAACTGGCATTTGTGATCTAGATCCTACTCGTTGGGCTAATTCGCATTGGCGATCTGTCAAGGTTGGGTGGGACGAATCTACTGCAGGAGAGAGACAGCCAAGGGTTTCATTGTGGGAGATTGAGCCTTTAACAACATTCCCTATGTATCCATCTCCTTTTCCTCTCAGGCTTAAACGGCCGTGGCCTCCTGGTCTCCCATCTTTCCATGGCCTTAAAGAAGATGATATGGGTATGAGTATGAGTTCACCGCTTATGTGGGATCGAGGACTCCAATCTCTAAACTTTCAAGGTATGGGAGTAAACCCGTGGATGCAGCCGAGACTTGATACGTCGGGCTTGCTTGGTATGCAAAATGATGTGTACCAAGCAATGGCTGCAGCTGCCCTTCAAGACATGAGAGGCATTGATCCTGCAAAAGCTGCTGCTTCACTTCTTCAGTTCCAAAATTCGCCGGGGTTCTCAATGCAATCTCCGTCCTTAGTGCAGCCGCAGATGCTGCAGCAGCAACTCTCTCAGCAGCAGCAACAACTCTCTCAGCAGCAGCAGCAGCAGCAACAGCTCTCCCAACAGCAGCAGCAACAGCTCTCTCAACAGCAGCAGCAGCAGCTCTCTCAACAGCAGCAGCAACAACTCTCTCAGCAGCAGCAGCAACAGGCGTATCTTGGCGTTCCTGAAACCCACCAGCCTCAGTCTCAGGCTCAATCACAGTCAAACAATCATCTTTCTCAGCAGCAGCAGCAAGTAGTGGATAATCATAATCCGTCTGCGTCCAGTGCTGCTGTTGTTTCCGCTATGTCTCAATTTGGTTCTGCTTCTCAGCCCAACACGTCACCACTCCAGTCCATGACCTCTCTGTGTCATCAGCAAAGCTTCTCCGATACCAACGGAGGAAACAATCCTATTTCTCCACTTCACACTCTTCTCAGTAACTTCTCTCAAGACGAATCTTCTCAACTGCTCCACCTCACTAGAACAAACTCTGCAATGACTTCATCCGGTTGGCCATCAAAGCGTCCTGCAGTTGATTCATCGTTCCAGCACTCTGGAGCCGGTAATAATAACACTCAATCCGTATTGGAGCAACTGGGACAGTCCCACACAAGCAACGTTCCTCCAAACGCTGTCTCGTTGCCTCCATTTCCCGGTGGTAGAGAGTGCTCGATCGAGCAAGAAGGAAGCGCCTCAGACCCGCATAGCCATCTTCTCTTTGGAGTCAATATAGATTCATCTTCTCTTTTGATGCCGAACGGAATGTCAAACCTTAGAAGCATTGGTATTGAAGGTGGTGACTCCACGACTTTACCCTTCACATCATCTAATTTCAACAATGATTTCTCGGGTAATCTTGCAATGACAACACCTTCTAGTTGCATAGATGAATCGGGTTTTCTACAATCCTCAGAAAACCTCGGTTCCGAGAACCCACAATCTAACACCTTTGTGAAGGTGTACAAGTCAGGGTCTTTTGGAAGATCGTTAGATATATCAAAGTTTAGCAGCTACCACGAGCTGCGAAGCGAGCTTGCTCGCATGTTTGGCCTCGAAGGCCAATTAGAAGACCCTGTGAGATCAGGCTGGCAGCTTGTATTTGTTGACCGAGAGAACGACGTTCTTCTCCTCGGCGATGACCCTTGGCCGGAGTTTGTGAGCAGCGTGTGGTGCATTAAGATACTGTCACCACAAGAAGTGCAACAAATGGGAAAAAGAGGCCTTGAGCTTCTCAACTCCGCGCCATCTTCCAACAATGTCGATAAGCTCCCGAGCAACGGGAACTGTGACGACTTTGGGAACCGGTCAGACCCGAGGAATCTCGGTAACGGTATCGCATCAGTTGGGGGTTCATTCAACTACTAG
>AT1G34170.3
ATGGAAAATAATGGAGAAATGAATGCACAGCCTGAATTATCAGTTGATATAACCAAGACTTATATGTATGAGAAATTATGGAACATATGTGCTGGACCTTTGTGTGTTCTTCCGAAACCTGGAGAAAAAGTTTATTACTTTCCTCAAGGGCACATCGAGCTCATTGAGAATTCTACAAGAGATGAATTGGATCATATCAGGCCAATTTTTGATCTTCCATCTAAGCTTCGATGTCGTGTTGTGGCTATTGATCGTAAGGTAGACAAAAATACAGATGAAGTCTATGCTCAGATTTCGTTAATGCCTGATACAACAGAAGTTATGACCCATAATACTACTATGGATACTCGAAGACCAATAGTTTATTTTTTTAGTAAAATTTTAACGGCGTCTGACGTCAGTTTAAGTGGTGGATTAATTATTCCCAAACAATATGCCATTGAGTGTTTTCCTCCGCTGGATATGTCCCAACCAATATCCACACAAAATCTTGTTGCAAAGGATCTCTATGGTCAAGAATGGAGTTTCAAACATGTCTTTAGAGGTACACCGCAGAGACATATGTTTACTAGCGGCGGCGGCTGGAGCGTATTTGCAACAACAAAAAGATTGATTGTTGGGGATATATTTGTACTCCTTAGAGGAGAGAATGGGGAGTTACGATTTGGTATTAGGCGAGCAAAGCATCAACAAGGCCACATACCTTCATCAGTAATATCAGCAAATTGTATGCAACATGGAGTAATAGCTTCAGTAGTGAATGCTTTTAAAACCAAATGCATGTTCAATGTGGTTTATAAGCCAAGGATGCAGTTTGAGGGTAAGGATTTTTCTGAAAAAAGATACGATGGGACGATTATTGGTGTAAATGACATGTCTCCTCATTGGAAGGATTCAGAATGGCGAAGCCTAAAAGTGCAATGGGACGAGCTTTCACCATTTCTAAGACCTAATCAGGTTTCACCTTGGGACATCGAGCATCTAATTCCTTCGTCAGATATCTCTCAATCAAGTTTGAAAAAGAAAAAACATTGGCTTCAATTGAATGAAATTGGTGCAACATTATCGAATCTTTGGACATGCCAAGAAATTGGACAACGGAGCATGAATTCTCCTATAAGTGTTCCTGAGTTTAGTTATCCCAATGCAATTGAAGATTCAAAGTTTCTTTCTGGTTTGCTACTGAATCACTCACTCCTAGCCATACCTAATGAAAACTATAACAGCGACCAAATGATTCAACCAAGGAAAGAAGATATAACAACTGAAGCAACCACTAGTTGCCTCTTGTTTGGAGTTGATCTGACCAAAGTTCATATGCAAGGTGTAGCCATAAGTAGAGCTGTGGATTTAACTGCTATGCATGGATACAATCAGCTGATACAAAAACTGGAAGAACTCTTTGATCTCAAAGACGAGTTACGAACTCGCAATCAATGGGAAATAGTTTTTACAAACAATGAAGGAGCTGAGATGCTTGTCGGGGATGATCCATGGCCTGAGTTCTGCAATATGGCGAAAAGAATATTCATATGCTCAAAAGAGGAGATAAAGAAAATGAAGTTGAAGAACAAATTCTTTCAACCTGAATCAAAAGCTTTAACATCTTCAGACGTACCACCAAACGTCACAGATAACTAA
>AT1G34310.1
ATGGAAAGTGGCAACGTTGTGAATGCACAACCTGAATTATCAGGCATAATTGATGGATCCAAGAGCTATGTTTACGAGCAGTTATGGAAACTCTGTGCGGGACCTTTGTGTGATATTCCAAAACTTGGAGAAAAGGTTTATTACTTTCCTCAAGGTCACATAGAGCTTGTTGAGACATCTACAAGAGAAGAGTTGAATGAGTTACAACCAATTTGTGATCTTCCTTCTAAGCTTCAATGTCGTGTTATTGCTATTCATCTTAAGGTGGAAAACAATAGTGATGAGACTTATGCTGAGATCACTTTGATGCCAGATACAACTCAAGTTGTAATCCCTACTCAGAATGAAAATCAATTTAGACCATTAGTTAATTCCTTTACGAAGGTTTTAACGGCCTCAGATACAAGCGCTCATGGTGGATTCTTTGTACCGAAAAAACATGCCATTGAATGTCTCCCTTCGCTGGATATGTCTCAACCTTTACCTGCACAAGAACTTCTTGCTATAGATCTCCATGGTAATCAATGGAGATTCAACCACAACTATAGAGGTACACCGCAAAGACATTTGTTAACAACTGGTTGGAATGCATTCACAACATCAAAAAAATTGGTTGCAGGGGATGTCATCGTATTCGTTAGGGGAGAGACTGGAGAGTTACGAGTTGGTATCAGACGAGCAAGACATCAACAAGGGAATATACCTTCATCAATAGTATCAATAGATTGTATGAGACATGGGGTAGTTGCTTCCGCAAAGCATGCTTTTGATAACCAATGTATGTTCACTGTGGTTTACAAGCCAAGGTCAAGTAAATTTATTGTCAGTTACGACAAATTCTTGGACGCTGTGAACAATAAGTTCAATGTCGGTTCAAGATTTACAATGCGGTTAGAGGGTGATGATTTCTCTGAAAGAAGATGTTTTGGGACAATTATTGGAGTTAGTGATTTCTCTCCTCATTGGAAATGTTCAGAGTGGCGCAGCTTAGAAGTGCAGTGGGATGAATTTACATCATTTCCGGGACCTAAAAAAGTGTCACCCTGGGACATCGAACATTTAATGCCTGCAATAAATGTTCCGCGATCATTTTTGCTCAAGAACAAGCGTTTACGAGAAGTTAATGAAATCGGTTCTTCATCATCACATCTCTTACCTCCTATATTGACACAAGGACAAGAAAATGAACAACTAAGTGTTGCCTCTCCGATGAATATTTCTCTTCGTTATCGTGATGCAACTGAAGATGCTATGAATCCTTCTAAATTGCTAATGAGCTACCCTGTCCAACCAATGCCCAAACTAAATTACAATAACCAAATGGTTACAGAAATGGAAGAAAATATAACAACCAAGACAGGCACTAATTTTAGGCTGTTTGGAGTCACTCTGGACACTCCTCCGGTGATCAAAGATCCCATTGAAGAAATTGGCTCGGAGATTTCGAAACTTACTGAAGGAAAAAAGTTTGGTCTAAGCCAAACTTTAAGATCACCAACAGAGATCCAAAACAAGCAGTTCAGTTCTAGTAGAACTTGTACCAAAGTTCAAATGCAAGGTGTAACAATAGGAAGAGCTGTGGATTTAAGTGTTCTTAATGGATATGATCAGCTAATACTAGAATTGGAGAAGCTCTTTGATATCAAAGGTCAATTGCAAACTCGCAACCAATGGGAAATAGCTTTCACAGATAGTGACGAAGATAAGATGCTTGTTGGAGACGATCCATGGCCTGAATTCTGCAACATGGTGAAGAAGATATTCATTCAAAAGAGGAGGTAA
>AT1G34390.1
ATGGAAAGTGGCAACATTGTGAATGCACAACCTGAATTATCAGGCATAATTGATGGATCCAAGAGTTATATGTACGAGCAGTTATGGAAACTCTGTGCGGGGCCTTTGTGTGATATTCCAAAACTTGGAGAAAAGATTTATTACTTTCCTCAAGGCAATATAGAGCTTGTTGAGGCATCTACAAGAGAAGAGTTGAATGAGTTAAAACCAATTTGTGATCTTCCTTCTAAGCTTCAATGTCGTGTTATTGCTATTCAACTTAAGGTGGAAAACAATAGTGATGAGACTTATGCTGAGATCACTTTGATGCCAGATACAACTCAAGTTGTAATCCCTACTCAAAATGAAAATCAATTTAGACCATTAGTTAATTCCTTTACGAAGGTTTTAACGGCCTCGGATACAAGCGGTGGATTCTTTGTTCCAAAAAAACATGCCATTGAATGTCTTCCTCCCCTGGATATGTCTCAGCCTCTACCGACACAAGAACTTCTTGCTACAGATCTCCATGGTAATCAATGGAGATTCAACCACAACTATAGAGGTACACCGCAAAGACATTTGTTAACAACTGGTTGGAATGCATTCACAACATCAAAAAAATTGGTTGCAGGGGATGTTATTGTATTCGTTAGGGGAGAGACTGGAGAGTTACGAGTTGGTATCAGACGAGCAGGACATCAACAAGGGAATATACCTTCATCAATAATATCAATAGAAAGTATGAGACATGGGGTGATTGCTTCCGCAAAGCATGCTTTTGATAACCAATGTATGTTCATTGTGGTTTACAAGCCAAGATCAAGTCAATTTATTGTCAGTTACGACAAATTCTTAGATGCTGTGAACAATAAGTTCAATGTTGGTTCAAGATTTACAATGCGGTTTGAGGGTGATGATTTCTCTGAAAGAAGATATTTTGGGACAATTATTGGAGTTAGTGATTTCTCTCCTCATTGGAAGTGTTCAGAGTGGCGCAACTTAGAAGTGCAGTGGGATGAATTTGCATCATTTTCGAGACCTAATAAAGTGTCACCCTGGGAGATCGAACATTTAATGCCTGCGTTAAATGTTCCGCGACCATCTTTGCTCAAGAACAAGCGTTTACGAGAAGTTAATGAAATCGGTTCTTCATCATCACATCTCTTGCCTCCTATATTGACACAAGGACAAGAAATTGGCCAACTAAGCGTGGCCTCCCCGATGAATATTTCTCTCACTTATCGTGATACAACTGAAGATGTTATGAATCCTTCTAGATTGCTAATGAGCTACCCTGTCCAACCAATGCCCAAACTAAATTACAATAACCAAATGGTTACACAAATAGAAGAAAATATAACAACCAAGACTGGCACTAATTTTAGGCTGTTTGGAGTCTCACTGGTCACTCCTTCAGTGATCAAAGATCCCATTGAAGAAATTGGCTCGGAGATTTCGAAACTTACTGAAGGAAAAAAGTTTGGTCAAAGCCAAACTTTGAGATCACCAACAGAGATCCAAAGCAAGCAGTTCAGTTCTACTAGAACTTGTACCAAAGTTCAAATGCAAGGTGTAACAATAGAAAGAGCTGTGGATTTAAGTGTTCTGAATGGATATGATCAGCTAATACTAGAATTGGAGGAGCTCTTCGATCTCAAAGGCCAATTACAAACTCGCAACCAATGGGAAATAGCTTTCACAGATAGTGACGATGATAAGATGCTTGTTGGAGACGATCCATGGCCTGAATTCTGCAACATGGTGAAGAAGATATTGATATTCAAAAGAGGAGGTCAAAAACTTGAAGTCCAGTAA
>AT1G34410.1
ATGGAAAGTGGCAACATTGTGAATGCACAACCTAAATTATCAGGCATAATTGATGGATCCAAGAGCTATATGTACGAGCAGTTATGGAAACTCTGTGCAGGGCCTTTGTGTGATATTCCAAAACTTGGAGAAAATGTTTATTACTTTCCTCAAGGCAATATAGAGCTTGTTCAGGCATCTACAAGAGAAGAGTTGAATGAGTTACAACCAATTTGTGATCTTCCTTCTAAGCTTCAATGTCGTGTTATTGCAATTCATCTTAAGGTGGAAAACAATAGTGATGAGATTTATGCTGAGATCACTTTGATGCCAGATACAACTCAAGTTGTAATCCCTACTCAGAGTGAAAATCGATTTAGGCCATTAGTTAATTCCTTTACAAAGGTTTTAACGGCCTCAGATACAAGCGCTTATGGTGGATTCTCTGTTCCGAAAAAACATGCCATTGAATGTCTCCCTCCGCTGGATATGTCTCAGCCTCTACCGGCACAAGAAATTCTTGCTATAGATCTCCATGATAATCAATGGAGATTCAGACACAACTATAGAGGTACACCGCAAAGACATTCGTTAACAACTGGTTGGAATGAATTCATAACATCAAAGAAATTGGTTAAAGGAGATGTTATTGTATTCGTTAGGGGAGAGACTGGAGAGTTACGAGTTGGTATCAGACGAGCAAGACATCAACAAGGGAATATACCTTCATCAATAGTATCAATAGATTGTATGAGACATGGGGTAATTGCTTCCGCAAAGCATGCTTTTGATAACCAATGTATATTCATTGTGGTTTACAAGCCAAGGTCAAGTCAATTTATTGTCAGTTATGACAAATTCTTAGACGCTGTGAACAATAAGTTTAATGTCGGTTCAAGATTTACAATGCGGTTTGAGGGTGATGATTTCTCTGAAAGAAGATATTTTGGGACAATTATTGGAGTTAGTGATTTCTCTCCTCATTGGAAGTGTTCAGAGTGGCGCAGCTTAGAAGTGCAGTGGGATGAATTTGCATCATTTTCGAGACCTAATAAAGTGTCACCCTGGGAGATCGAACATTTAGTGCCTGCGTTAAATGTTCCGCGATCATCTTTGCTCAAGAACAAGCGTTTACGAGAAGTTAATGAATTCGGTTCTTCATCATCACATCTCTTGCCTCCTATATTGACACAAGGACAAGAAATTGGACAACTAAGCGTGGCCTCCCCGATGAATATTTCTCTTCGTTATCGTGATACAACTGAAGCTGCTATGAATCCTTCTAGATTGCTAATGAGCTACCCTGTCCAACCAATGCCCAAACTAAATTACAATAACCAAATGGTTACACAAATAGAAGAAAATATAACAACCAAGGCAGGCACTAATTTTAGGCTGTTTGGAGTCACTCTGGACACTCCTCCGATGATCAAAGATCCCATTAAACAAATTGGCTCGGATATTTCGAAACTTACTGAAAGAAAAAAGTTTGGTCAAAGCCAAACTTTGAGATCACCAATAGAGATCCAAAGCAAGCAGTTCAGTTCTTCTAGGACTTGTACCAAAGTTCAAATGCAAGGTGTAACAATAGGAAGAGCTGTGGATTTAAGTGTTCTTAATGGATATGATCAGCTAATACTAGAATTGGAGAAGCTCTTTGATATCAAAGGCCAATTACAAACTCGCAACCAATGGAAAATAGCTTTCACAGATAGTGACGGGTATGAGATGCTTGTTGGAGACGATCCATGGCCTGAATTCTGCAAAATGGTGAAGAAGATATTGATATATTCAAAAGAGGAGGTCAAAAACCTGAAGTCCAGTAAGAGTCTCTCAAGTTGA
>AT1G35240.1
ATGGAAACTGGCAACGTTGTGAATGCACAACCTGAATTATCAGGCATAATTGATGGATCCAAGAGCTATATGTACGAGCAGTTATGGAAACTCTGTGCGGGACCTTTGTGTGATATTCCAAAACTTGGAGAAAATGTTTATTACTTTCCTCAAGGCAATATAGAGCTTGTTGATGCATCTACAAGAGAAGAGTTGAATGAGTTACAACCAATTTGTGATCTTCCTTCTAAGCTTCAATGCCGTGTTATTGCAATTCATCTTAAGGTGGAAAACAATAGTGATGAGACTTATGCTGAGATCACTTTGATGCCAGATACAACTCAAGTTGTAATCCCTACTCAGAGTGAAAATCAATTTAGGCCATTAGTTAATTCCTTTACGAAGGTTTTAACGGCCTCTGATACAAGCGCTTATGGTGGATTCTTTGTTCCGAAAAAACATGCCATTGAATGTCTCCCTCCACTGCCTCTACCGGCACAAGAACTTCTTGCTAAAGATCTCCATGGTAATCAATGGAGATTCAGACACAGCTATAGAGGTACACCGCAAAGACATTCGTTAACAACTGGTTGGAATGAATTCACAACATCGAAAAAGTTGGTTAAAGGAGATGTTATTGTATTCGTTAGGGGAGAGACTGGAGAGTTACGAGTTGGTATCAGACGAGCAAGACATCAACAAGGGAATATACCTTCATCAATAGTATCAATAGATTGTATGAGACATGGGGTAATTGCTTCCGCAAAGCATGCTCTTGATAACCAATGTATATTCATTGTGGTTTACAAGCCAAGTATCAGGTCAAGTCAATTTATTGTCAGTTACGACAAATTCTTAGACGCTATGAACAATAAGTTCATTGTCGGTTCAAGATTTACAATGCGGTTTGAGGGTGATGATTTCTCTGAAAGAAGATATTTTGGGACAATTATTGGAGTTAATGATTTCTCTCCTCATTGGAAGTGTTCAGAGTGGCGCAGCTTAGAAGTTCAGTGGGATGAATTTGCATCATTTTCGAGACCTAATAAAGTGTCACCCTGGGAGATCGAACATTTAATGTCTGCGTTAAATGTTCCGCGATCATCTTTGCTCAAGAACAAGCGTTTACGAGAAGTTAATGAATTCGGACAAGAAATTGGACAACTAAGCGTCGCCTCCCCGATGAATACTTCTCTTCGTTATCGTGATACAACTGAAGATGCTATGAATCCTTCTAGATTGCTAATGAGCTACCCTGTCCAACCAATGCCCAAACTAAATTACAATAACCAAATGGTTACACAAATAGAAGAAAATATAACAACCAAGGCAGTCACTAATTTTAGGCTGTTTGGAGTCTCTCTAGCCATTCCTCTAGTGATCAAAGATCCCATTGAAGAAATTGGCTCGGATATTTCGAAACTTACTGAAGGAAAAAAGTTTGGTCAAAGCCAAACTTTGAGATCACCAATAGAGATCCAAAGCAAGCAGTTTGGTTCTACTAGAACTTGTACCAAAGTTCAAATGCAAGGTGTAACAATAGGAAGAGCTGTGGATTTAAGTGTTCTTAATGGATATGATCAGCTAATACTAGAATTGGAGAAGCTCTTTGATCTCAAAGGCCAACTACAAACTCGCAACCAATGGAAAATAGCTTTCACAGATAGTGACGGGTATGAGATGCTTGTTGGAGACGATCCATGGCCTGAATTCTGCAAAATGGTGAAGAAGATATTGATATATTCAAAAGAGGAGGTCAAAAACCTAAAGTCCAGTAAGAGTCTCTCAAGTTGA
>AT1G35520.1
ATGGAAACTGGCAACGTTGTGAATGCACAACCTGAATTATCAGGCATAATTGATAGATCCAAGAGCTATATGTACGAGCAGTTATGGAAACTCTGTGCGGGACCTTTGTGTGATATTCCAAAACTTGGAGAAAAGGTTTATTACTTTCCTCAAGGCAATATAGAGCTTGTTGAGGCATCTACAAGAGAAGAGTTGAATGAGTTACAACCAATTTGTGATCTTCCTTCTAAGCTTCAATGTCGTGTTATTGCAATTCATCTTAAGGTGGAAAACAATAGTGATGAGACTTATGCTAAGATCACTTTGATGCCAGATACAACTGTAAGTGAAAATTTACAAGTTGTAATCCCTACTCAGAATGAAAATCAATTTAGGCCATTAGTTAATTCCTTTACAAAGGTTTTAACTGCCTCTGATATAAGTGCTAATGGTGTATTTTCTGTTCCGAAAAAACATGCCATTGAATGTCTCCCTCCTCTGGATATGTCTCAGCCTCTACCGGCACAAGAACTTCTTGCTATAGATCTCCATGGTAATCAATGGAGCTTCAGACACAGCTATAGAGGTACACCGCAAAGACATTTATTAACAACTGGTTGGAATGAATTTACAACATCAAAAAAATTGGTTAAAGGAGATGTTATTGTATTCGTTAGGGGAGAGACTGGAGAGTTACGAGTTGGTATCAGACGAGCAAGACATCAACAAGGGAATATACCTTCATCAATAGTATCAATAGATTGTATGAGACATGGGGTAATTGCTTCCGCAAAGCATGCTTTTGATAACCAATGTATGTTCATTGTGGTTTACAAGCCAAGGTCAAGTCAATTTATTGTCAGTTACGACAAATTCTTAGACGCTGTGAACAATAAGTTCAATGTCGGTTCAAGATTTACAATGCGGTTTGAGGGTGATGATTTATCTGAAAGAAGATATTTTGGGACAATTATTGGAGTTAGTAATTTCTCTCCTCATTGGAAGTGTTCAGACTGGCGCAGCTTAGAAGTGCAGTGGGATGAATTTGCATCATTTTTGAGACCTAATAAAGTGTCACCCTGGGAGATCGAACATTTAATGCCTGCGTTAAATGTTCCGCGATCATCTTTTCTCAAGAACAAGCGTTTACGAGAAGTTAATGAATTCGGTTCTTCATCATCACATCTCTTGCCTCCTATATTGACACAAGGACAAGAAATTGGACAACTAAGCGTGGCCTCCCCGATGAATATTTCTCTTCTTTATCGTGAAACAACAGAAGATGCTATGAATCCTTCTAGATTGCTAATGAGCTACCCTGTCCAACCAATGCCCAAACGAAATTACAATAACCAAATGGTTACACAAATAGAAGAAAATATAACAACCAAGGCAGGCACTAATTTTAGGTTGTTTGGAGTCTCTCTGGCCACTCCTCCGGTGATCAAAGATCCCATTGAACAAATTGGCTCGGATATTTCGAAACTTACTGAAGGAAAAAAGTTTGGTCAAAGCCAAACTTTGAGATCACCAACAAAAATCCAAAGCAAGCAGTTCAGTTCTACTAGAACTTGTACGAAAGTTCAAATGCAAGGTGTAACAATAGGAAGAGCTGTGGATTTAAGTGTTCTTAATGGATATGATCAGCTAATACTAGAATTGGAGAAGCTCTTCGATCTCAAAGGCCAATTACAAACTCGCAACCAATGGAAAATAATTTTCACAGGTAGTGACGAGGATGAGATGCTTGTTGGAGACGATCCATGGCCTGAATTCTGCAACATGGTGAAGAGGATATATATTCAAAAGAGGAGGTAA
>AT1G35540.1
ATGGAAAGTGGCAACGTTGTGAATACACAACCTGAATTATCAGGCATAATTGATGGATCCAAGAGTTATATGTACGAGCAGTTATGGAAACTCTGTGCGGGACCTTTGTGTGATATTCCAAAACTTGGAGAAAAGGTTTATTACTTTCCTCAAGGCCATATAGAGCTTGTTGAGGCATCTACAAGAGAAGAGTTGAATGAGTTACAACCAATTTGTGATTTTCCTTCTAAGCTTCAATGTCGTGTTATTGCTATTCAACTTAAGGTGGAAAACAATAGTGATGAGACTTATGCTGAGATCACTTTGATGCCAGATACAACTCAAGTTGTAATCCCTACTCAGAATCAAAATCAATTTAGGCCATTAGTTAATTCCTTTACGAAGGTTTTAACGGCCTCAGATACAAGCGTTCATGGTGGATTCTCTGTTCCGAAAAAACATGCCATTGAATGTCTCCCTCCGCTGGATATGTCACAGCCTCTACCGACACAAGAAATTCTTGCTATAGATCTTCATGGTAATCAATGGAGATTCAGACACATCTATAGAGGTACAGCGCAAAGACATTTGTTAACAATTGGTTGGAATGCATTCACAACATCAAAAAAATTGGTTGAAGGAGATGTTATTGTATTCGTTAGGGGAGAGACTGGAGAGTTACGAGTTGGTATCAGACGAGCAGGACATCAACAAGGGAATATACCTTCATCAATAGTATCAATAGAAAGTATGAGACATGGGATAATTGCTTCTGCAAAGCATGCTTTTGATAACCAATGTATGTTCATTGTGGTTTACAAGCCAAGGTCAAGTCAATTTATTGTCAGTTACGACAAATTCTTAGACGTTGTGAACAATAAGTTCAATGTCGGTTCAAGATTTACAATGCGGTTTGAGGGTGATGATTTCTCTGAAAGAAGATCTTTTGGGACAATTATTGGAGTTAGTGATTTCTCTCCTCATTGGAAGTGTTCAGAGTGGCGCAGCTTAGAAGTGCAGTGGGATGAATTTGCATCATTTCCGAGACCAAACCAAGTTTCACCATGGGACATCGAACATTTAACGCCTTGGTCAAATGTTTCCAGGTCATCTTTTCTCAAGAACAAGCGTTCACGAGAAGTTAATGAAATCGGTTCTTCCTCATCACATCTCTTGCCTCCTACATTGACACAAGGACAAGAAATTGGACAACAAAGCATGGCCACCCCGATGAATATTTCTCTTCGTTATCGTGATATTACTGAAGATGCTATGACTCCTTCTAGATTGCTAATGAGCTACCCTGTCCAACCAATGGCCAAACTAAATTACAATAATGTGGTTACACCAATAGAAGAAAATATAACAACCAATGCAGTCGCTAGTTTTAGGTTGTTTGGAGTCTCTCTGGCCACTCCTTCGGTGATCAAAGATCCCGTTGAACAAATTGGCTTGGAGATTTCTAGACTTACTCAGGAAAAAAAGTTTGGTCAAAGCCAAATTTTGAGATCACCAACAGAGATCCAAAGCAAGCAGTTCAGTTCTACCAGAACTTGTACCAAAGTTCAAATGCAAGGTGTAACAATAGGAAGAGCTGTGGATTTAAGTGTTCTTAATGGATATGATCAGTTAATACTAGAATTGGAGAAGCTCTTCGATCTCAAAGGCCAATTGCAAGCTCGCAACCAATGGGAAATAGCTTTCACAAATAATGAAGAGGATAAGATGCTTGTTGGAGAAGATCCATGGCCTGAATTCTGCAACATGGTGAAGAAGATATTCATATATTCAAAAGAGGAGGTCAAAAACTTGAAGTCCAGGAAGAGTCTCTCAAGTTGA
>AT1G59750.1
ATGGCAGCTTCCAATCATTCATCTGGTAAACCTGGAGGAGTTTTAAGTGATGCTTTATGTAGGGAGCTCTGGCATGCCTGTGCTGGACCTCTTGTAACCCTACCTCGTGAAGGGGAACGAGTTTATTATTTCCCTGAAGGCCACATGGAGCAGCTCGAGGCATCAATGCACCAAGGTTTGGAGCAACAGATGCCTTCCTTCAACCTCCCATCTAAGATCCTCTGTAAAGTTATCAACATCCAGCGCAGGGCAGAGCCCGAGACTGACGAAGTATATGCGCAAATAACCTTATTGCCAGAACTGGATCAAAGCGAACCCACTAGCCCAGATGCCCCTGTTCAAGAACCTGAAAAGTGCACCGTACATTCATTTTGCAAGACACTAACTGCTTCAGACACAAGCACACATGGTGGCTTCTCGGTGCTACGGAGACATGCAGATGATTGTCTCCCACCCTTGGATATGTCCCAACAACCACCGTGGCAAGAATTGGTTGCAACTGATTTGCACAATAGTGAATGGCATTTTAGGCACATTTTCCGAGGCCAACCAAGGCGTCATTTGCTAACAACTGGATGGAGTGTTTTTGTTAGCTCGAAGAAACTAGTGGCTGGTGATGCTTTCATATTCTTAAGGGGTGAGAATGAAGAGCTCCGAGTAGGTGTTAGGCGGCACATGAGACAACAGACTAATATCCCGTCATCTGTCATTTCAAGTCATAGCATGCATATTGGGGTCCTTGCAACAGCAGCTCATGCCATTACAACAGGAACAATCTTTTCTGTCTTCTACAAGCCAAGGACAAGTAGGTCAGAGTTTATTGTGAGCGTCAATAGGTATCTCGAAGCTAAGACCCAGAAGCTGTCTGTAGGCATGCGTTTCAAGATGAGATTCGAGGGGGAAGAAGCTCCCGAGAAAAGGTTCAGTGGCACAATAGTTGGTGTTCAGGAAAATAAGTCTTCGGTCTGGCATGATTCTGAATGGAGATCGCTAAAGGTTCAATGGGACGAACCCTCATCTGTATTTCGTCCTGAAAGAGTTTCACCTTGGGAACTTGAGCCCCTAGTTGCAAATAGTACTCCGTCTTCACAACCTCAGCCTCCGCAAAGGAACAAACGACCAAGACCTCCTGGTTTACCTTCACCAGCCACTGGTCCATCTGGTCCTGTTACTCCAGATGGTGTGTGGAAATCCCCGGCAGACACTCCTTCCTCAGTGCCATTATTCTCTCCTCCTGCCAAAGCTGCTACGTTTGGTCATGGTGGGAACAAATCATTTGGAGTATCTATTGGATCAGCCTTTTGGCCCACCAATGCAGATAGTGCAGCTGAATCCTTTGCTTCAGCGTTTAACAATGAATCTACTGAAAAGAAACAAACTAATGGAAATGTCTGTAGGCTTTTTGGGTTTGAGCTAGTTGAAAATGTTAATGTGGATGAATGTTTCTCTGCTGCCTCTGTGTCTGGTGCTGTCGCTGTAGATCAACCTGTCCCATCCAACGAGTTTGACTCTGGCCAGCAATCTGAGCCATTAAACATCAACCAATCTGATATTCCTTCGGGGAGTGGTGACCCTGAGAAATCCTCTTTGAGGTCTCCTCAAGAATCACAAAGTAGACAGATACGTAGCTGCACAAAGGTGCACATGCAAGGCAGTGCAGTAGGCAGAGCTATTGATTTGACAAGGTCAGAGTGTTATGAAGATCTGTTCAAGAAGCTGGAAGAGATGTTTGATATCAAGGGTGAACTCTTAGAATCTACCAAAAAATGGCAAGTCGTTTACACCGATGATGAAGATGACATGATGATGGTTGGTGATGATCCATGGAATGAGTTCTGTGGAATGGTGAGGAAGATATTCATCTACACACCTGAGGAAGTGAAGAAACTTTCACCGAAGAACAAACTCGCAGTCAATGCAAGGATGCAGCTCAAAGCTGATGCAGAGGAAAATGGGAATACAGAGGGCAGATCATCATCTATGGCGGGATCAAGATGA
>AT1G77850.1
ATGTCACCGCCGTCGGCAACCGCCGGTGACATCAACCACCGTGAAGTAGACCCGACGATCTGGCGCGCTTGTGCTGGAGCCTCCGTCCAGATCCCTGTCCTTCACTCTAGGGTTTACTACTTTCCACAAGGTCACGTTGAGCACTGTTGCCCTCTCCTCTCTACTCTTCCTTCCTCCACCTCGCCGGTTCCATGTATCATCACTTCAATTCAGTTGCTCGCCGATCCGGTCACCGACGAGGTCTTTGCTCACCTTATTCTTCAACCGATGACGCAGCAGCAGTTTACTCCGACTAATTATTCACGATTCGGCAGATTCGATGGCGATGTTGATGATAACAACAAGGTGACTACCTTCGCCAAAATTCTCACGCCTTCTGATGCTAACAATGGAGGTGGCTTCTCCGTTCCTCGTTTCTGTGCTGATTCCGTCTTCCCTCTGCTTAATTTTCAAATCGATCCACCGGTTCAGAAGCTCTACGTCACTGATATCCATGGAGCTGTTTGGGATTTCAGGCATATCTATCGCGGTACACCGAGGCGTCACTTGCTAACAACGGGATGGAGTAAGTTCGTCAATAGCAAGAAGCTCATCGCTGGAGATTCGGTGGTGTTTATGAGAAAATCTGCAGATGAGATGTTCATCGGCGTTAGGAGAACTCCGATCTCAAGCAGCGACGGAGGAAGTAGCTATTACGGAGGAGATGAGTATAACGGTTACTACAGTCAGAGTAGCGTTGCCAAGGAAGATGATGGGAGTCCGAAGAAGACGTTTAGGAGATCTGGGAATGGTAAGTTGACTGCTGAGGCTGTGACGGATGCGATCAATAGAGCGTCTCAGGGATTACCATTTGAGGTGGTGTTTTATCCGGCTGCTGGATGGTCTGAGTTTGTTGTGAGAGCTGAAGATGTTGAGTCTTCAATGTCTATGTATTGGACTCCTGGGACTCGAGTCAAGATGGCTATGGAGACTGAAGATTCTTCTCGGATCACATGGTTTCAAGGCATCGTTTCCTCTACTTATCAGGAGACCGGTCCATGGCGTGGATCTCCATGGAAGCAGCTTCAGATCACATGGGATGAACCTGAGATTCTGCAAAACGTGAAGAGGGTGAATCCATGGCAAGTGGAAATTGCTGCACATGCAACTCAACTGCATACCCCTTTCCCTCCAGCAAAGAGGTTGAAGTATCCACAACCCGGAGGAGGGTTCTTGAGTGGAGATGATGGAGAAATCCTTTATCCTCAAAGTGGACTGTCTAGTGCAGCAGCACCTGATCCAAGTCCTTCTATGTTCTCGTATTCTACATTTCCTGCTGGCATGCAGGGAGCCAGGCAATATGATTTTGGGTCTTTCAATCCAACCGGATTCATTGGAGGAAATCCTCCCCAGCTATTCACCAATAACTTCTTAAGTCCGCTTCCTGATTTGGGAAAAGTGTCGACTGAGATGATGAACTTTGGCAGTCCGCCATCAGATAACTTATCGCCTAATAGCAACACCACTAATCTGTCCTCTGGAAATGACCTGGTTGGAAACCGAGGCCCCCTTTCAAAGAAAGTTAACTCGATTCAGTTGTTTGGCAAGATCATTACCGTGGAGGAGCATTCTGAGAGCGGTCCTGCAGAGTCTGGCTTGTGTGAAGAGGATGGCAGCAAAGAGTCCAGCGACAATGAGACACAGTTGTCCTTATCACATGCTCCTCCAAGCGTGCCTAAACATTCCAACAGCAACGCAGGTTCTAGCTCCCAAGGTTAA
>AT2G28350.1
ATGGAGCAAGAGAAAAGCTTGGATCCACAACTATGGCATGCTTGTGCAGGATCAATGGTTCAAATCCCTTCACTGAATTCAACGGTTTTTTACTTCGCTCAAGGCCACACAGAGCACGCTCACGCGCCTCCTGATTTTCACGCGCCGCGCGTTCCACCTCTTATCCTCTGTCGTGTCGTCTCCGTGAAGTTCCTCGCCGACGCTGAAACAGACGAAGTTTTTGCTAAAATTACGCTTTTGCCACTTCCGGGAAACGACTTGGATCTAGAAAACGACGCCGTTTTGGGTCTAACTCCTCCTTCTTCTGACGGTAACGGTAACGGTAAAGAGAAACCGGCGTCTTTCGCTAAAACGTTAACGCAGTCTGACGCTAATAACGGCGGTGGTTTCTCCGTTCCACGTTATTGCGCCGAGACGATTTTCCCGCGGCTTGATTACTCGGCGGAGCCACCGGTTCAAACCGTGATTGCTAAAGACATCCACGGCGAGACTTGGAAATTCCGGCATATTTACAGAGGAACACCTCGCCGTCATCTCCTAACCACCGGTTGGAGCACTTTCGTTAACCAGAAGAAACTAATCGCCGGAGACTCAATCGTCTTCCTCCGTTCTGAATCCGGTGACCTCTGCGTCGGAATCCGCCGCGCTAAACGCGGCGGTCTCGGATCTAACGCAGGATCCGACAATCCTTACCCTGGATTCTCCGGTTTCCTCCGTGACGACGAGTCAACAACAACAACATCGAAGCTAATGATGATGAAACGCAACGGAAACAACGACGGAAACGCCGCGGCTACAGGGAGGGTTAGAGTAGAAGCAGTAGCGGAAGCGGTGGCGCGTGCAGCGTGTGGACAAGCGTTTGAGGTTGTTTATTATCCACGCGCTAGTACACCGGAGTTTTGCGTAAAAGCAGCTGATGTTAGATCAGCAATGAGGATAAGATGGTGTAGTGGTATGCGTTTTAAAATGGCGTTTGAAACAGAGGATTCTTCTAGAATCAGTTGGTTTATGGGTACTGTCTCCGCCGTTCAAGTCGCTGATCCAATTCGTTGGCCTAATTCACCATGGCGTCTCCTTCAGGTAGCTTGGGACGAACCGGATTTGTTACAAAACGTTAAGCGGGTTAGTCCGTGGTTAGTCGAATTGGTATCGAACATGCCTACAATACATTTATCTCCATTCTCTCCGAGGAAGAAGATTAGGATTCCGCAGCCATTTGAGTTTCCATTCCACGGTACTAAATTCCCGATTTTCTCCCCGGGATTCGCCAACAATGGCGGTGGCGAGTCCATGTGTTATCTGTCAAACGACAACAATAATGCTCCTGCAGGAATACAGGGAGCCAGGCAAGCTCAACAACTCTTCGGATCACCATCTCCGTCTTTGTTGTCTGATCTCAATCTTAGTAGTTACACCGGTAACAACAAGTTACATTCTCCGGCGATGTTTCTATCGAGTTTCAACCCGAGGCATCATCATTATCAGGCTAGGGATAGTGAGAATAGTAATAACATTTCGTGTTCTTTAACTATGGGGAATCCTGCTATGGTTCAGGATAAGAAGAAGTCTGTTGGTTCGGTTAAGACTCATCAGTTCGTGTTGTTCGGTCAACCGATTTTAACCGAACAGCAAGTTATGAACCGAAAACGGTTTTTGGAAGAAGAGGCGGAAGCGGAGGAGGAGAAAGGTTTAGTGGCTCGTGGGTTAACATGGAATTATAGTTTGCAAGGACTTGAGACGGGTCATTGTAAAGTTTTCATGGAATCTGAGGATGTTGGACGCACACTCGATCTCTCGGTTATTGGCTCGTACCAAGAATTGTACCGGAAATTGGCTGAGATGTTTCATATAGAAGAGAGGTCGGATTTGTTGACTCATGTTGTGTACCGGGATGCAAATGGTGTTATCAAACGTATTGGAGACGAACCTTTCAGTGATTTCATGAAAGCAACTAAACGGCTAACAATCAAGATGGATATTGGTGGCGACAACGTGAGAAAGACGTGGATAACCGGAATCAGGACTGGTGAAAATGGTATAGACGCTTCTACGAAGACTGGTCCGCTCAGCATCTTCGCTTGA
>AT2G33860.1
ATGGGTGGTTTAATCGATCTGAACGTGATGGAGACGGAGGAAGACGAAACGCAAACGCAAACACCGTCTTCAGCTTCTGGGTCTGTCTCTCCTACTTCGTCTTCTTCAGCTTCTGTGTCTGTGGTGTCTTCGAATTCTGCTGGTGGAGGGGTTTGTTTGGAGCTGTGGCATGCTTGTGCTGGACCCCTTATCTCTCTACCAAAAAGAGGAAGCCTTGTGTTGTATTTCCCTCAGGGACATTTGGAACAAGCCCCCGATTTCTCCGCCGCGATTTACGGGCTCCCTCCTCACGTGTTCTGTCGTATTCTCGATGTTAAGCTTCACGCAGAGACGACTACAGATGAAGTTTATGCTCAAGTCTCTCTTCTTCCTGAGTCAGAGGACATTGAGAGGAAGGTGCGTGAAGGAATTATAGATGTTGATGGTGGAGAGGAAGATTATGAAGTGCTTAAGAGGTCTAATACTCCTCACATGTTTTGCAAAACCCTTACTGCTTCTGATACAAGCACCCATGGTGGTTTCTCTGTTCCTCGCCGAGCTGCTGAGGATTGCTTCCCTCCTCTGGACTATAGCCAGCCCCGGCCTTCTCAGGAGCTTCTTGCTAGGGATCTTCATGGCCTGGAGTGGCGATTTCGCCACATTTATCGAGGGCAACCTAGGAGGCATTTGCTCACTACCGGGTGGAGTGCGTTTGTGAACAAGAAGAAGCTTGTCTCTGGTGATGCTGTGCTTTTCCTTAGAGGAGATGATGGCAAACTGCGACTGGGAGTTAGAAGAGCTTCTCAAATCGAAGGCACCGCTGCTCTCTCGGCTCAATATAATCAGAATATGAACCACAACAATTTCTCTGAAGTAGCTCATGCCATATCGACCCATAGCGTTTTCAGCATTTCCTACAACCCCAAGGCAAGCTGGTCAAACTTCATAATCCCTGCACCAAAGTTCTTGAAGGTTGTTGACTATCCCTTTTGCATTGGGATGAGATTTAAAGCGAGGGTTGAATCTGAAGATGCATCTGAGAGAAGATCCCCTGGGATTATAAGTGGTATCAGCGACTTGGATCCAATCAGGTGGCCTGGTTCAAAATGGAGATGCCTTTTGGTAAGGTGGGACGACATTGTGGCAAATGGGCATCAACAGCGTGTCTCGCCATGGGAGATCGAACCATCTGGTTCCATCTCCAATTCAGGCAGCTTCGTAACAACTGGTCCCAAGAGAAGCAGGATTGGCTTTTCCTCAGGAAAGCCTGATATCCCTGTCTCTGAGGGGATTCGCGCCACAGACTTTGAGGAATCATTGAGATTCCAGAGGGTCTTGCAAGGTCAAGAAATTTTTCCGGGTTTTATCAACACTTGTTCGGATGGTGGAGCCGGTGCCAGGAGAGGCCGCTTCAAAGGAACAGAATTTGGTGACTCTTATGGTTTCCATAAGGTCTTGCAAGGTCAAGAAACAGTTCCCGCCTACTCAATAACCGATCATCGGCAGCAGCACGGGTTGAGCCAGAGGAACATTTGGTGTGGGCCGTTCCAGAACTTTAGTACACGTATCCTCCCCCCATCTGTATCATCATCACCCTCTTCCGTCTTGCTTACCAACTCGAACAGTCCTAACGGACGTCTGGAAGACCATCACGGAGGTTCAGGCAGATGCAGGCTGTTTGGTTTCCCATTAACCGACGAAACCACAGCAGTTGCATCTGCGACGGCTGTCCCCTGCGTTGAAGGGAATTCCATGAAAGGTGCGTCAGCTGTTCAAAGCAATCATCATCATTCGCAAGGAAGGGACATCTATGCAATGAGAGACATGTTGCTAGACATTGCTCTCTAG
>AT2G46530.3
ATGAGCCAAACAAGCTTAGAGCCACTTATAATTTCTATTATAAAGCTTCAAATTTTGCAACTTTGGTTGAAATTGATAGCTGTTGGTTGGAATTTAGGGTCTAATGATGATGAATTGTACACGGAGCTATGGAAAGCTTGTGCAGGGCCACTTGTGGAAGTTCCTCGTTATGGTGAAAGAGTTTTCTACTTCCCTCAAGGTCACATGGAACAATTGGTTGCTTCGACTAATCAAGGAGTTGTTGATCAAGAGATACCAGTGTTTAATCTTCCTCCAAAGATACTTTGTCGTGTTCTTAGTGTTACGTTAAAAGCAGAACATGAGACCGATGAGGTTTACGCTCAGATCACATTACAACCAGAAGAAGATCAAAGTGAACCAACAAGTCTTGACCCACCTTTAGTAGAACCAGCTAAACCAACGGTTGATTCTTTTGTGAAGATTCTAACAGCTTCAGATACAAGCACACATGGTGGATTCTCTGTTCTTCGTAAACACGCCACTGAGTGTTTACCTTCACTTGATATGACACAACCTACACCGACTCAAGAACTTGTAGCTAGAGATCTTCACGGCTATGAATGGAGGTTTAAGCATATATTTAGAGGGCAACCGAGGAGGCATTTACTTACAACCGGTTGGAGTACATTTGTAACCTCGAAAAGACTTGTAGCTGGAGATGCATTTGTGTTCTTGAGGGGTGAAACCGGGGATTTACGGGTTGGTGTGAGGCGTTTAGCTAAGCAGCAAAGCACGATGCCCGCATCCGTTATTTCGAGTCAGAGTATGCGTTTGGGAGTTCTTGCTACAGCTTCTCATGCTGTTACCACAACAACTATATTTGTTGTCTTCTATAAACCAAGGATAAGCCAGTTTATAATTAGTGTGAACAAGTATATGATGGCGATGAAGAACGGGTTTTCTCTCGGTATGCGGTATAGGATGAGATTCGAAGGAGAAGAGTCTCCTGAGAGAATATTTACAGGTACCATTATTGGCAGTGGAGATCTATCTTCTCAATGGCCAGCTTCCAAATGGAGGTCATTGCAGATCCAATGGGACGAGCCATCTTCTATACAGAGACCAAACAAGGTCTCACCGTGGGAGATCGAGCCTTTCTCACCATCCGCGCTTACACCAACCCCTACTCAACAACAATCAAAGTCCAAACGGTCCAGACCAATCTCAGAAATCACAGGGAGTCCTGTAGCTTCTAGTTTCTTGAGTAGTTTCTCGCAGAGCCACGAGTCTAATCCATCGGTCAAACTGTTGTTTCAAGATCCAGCAACCGAGAGAAACTCAAACAAATCAGTGTTTTCAAGTGGATTACAATGCAAGATAACCGAGGCTCCGGTCACAAGTAGTTGTAGGTTATTCGGATTCGATCTCACGAGCAAGCCTGCTTCTGCTACAATTCCTCATGACAAGCAGCTAATAAGTGTGGATTCAAATATATCTGATTCTACCACCAAGTGTCAAGATCCTAACTCTTCAAACTCACCAAAAGAGCAGAAACAACAAACATCCACAAGAAGCCGAATCAAGGTGCAAATGCAAGGAACAGCGGTTGGACGCGCGGTTGATTTAACATTGTTGAGATCATACGATGAACTAATAAAAGAGCTAGAGAAAATGTTTGAGATTGAAGGAGAACTTAGTCCTAAAGACAAATGGGCTATCGTGTTTACAGACGATGAAGGAGATAGGATGCTTGTAGGAGATGATCCATGGAATGAGTTCTGTAAAATGGCAAAGAAGTTATTCATATATCCGAGTGATGAGGTCAAGAAAATGAGGTCGAAGTCGTTGTTGGGTGATAAAGGTACGATCGTAAATCTTGAATCAGATCAGAGGACAGTTCACGTTTAA
>AT3G61830.1
ATGGCGAGTGTTGAAGGTGATGATGATTTCGGAAGTTCTTCGTCAAGGTCTTATCAAGATCAACTATACACAGAGCTATGGAAAGTTTGTGCAGGTCCATTAGTGGAAGTTCCTCGTGCTCAAGAGAGAGTTTTCTACTTCCCTCAGGGTCACATGGAACAACTTGTGGCGTCAACTAATCAAGGAATCAATTCAGAAGAAATACCTGTTTTTGATCTTCCTCCAAAGATACTTTGTCGAGTTCTTGATGTCACTTTAAAGGCGGAGCATGAAACAGATGAGGTTTACGCTCAGATCACATTACAACCAGAGGAAGATCAAAGTGAACCAACAAGTCTTGATCCACCTATTGTTGGACCAACTAAGCAAGAGTTTCATTCGTTTGTTAAGATTTTAACGGCTTCAGATACAAGCACTCATGGTGGATTCTCTGTTCTTCGTAAACACGCCACTGAATGCTTGCCTTCTTTGGATATGACACAAGCTACTCCTACTCAAGAACTTGTGACTAGAGATCTTCATGGCTTTGAATGGAGGTTTAAGCATATATTCAGAGGACAACCACGGAGGCATTTGCTTACTACGGGTTGGAGTACATTTGTATCCTCGAAAAGACTTGTAGCTGGAGATGCTTTTGTGTTCTTGAGGGGTGAGAATGGGGATTTACGGGTTGGAGTGAGACGATTAGCTCGGCATCAAAGCACAATGCCTACTTCGGTTATTTCAAGTCAGAGCATGCATTTGGGAGTTCTTGCTACAGCTTCTCATGCTGTGCGTACAACAACAATCTTTGTTGTCTTTTACAAGCCTAGGATAAGCCAATTCATAGTTGGGGTGAACAAGTATATGGAAGCTATAAAGCATGGATTTTCTCTCGGTACCCGATTCAGAATGAGGTTTGAAGGAGAAGAGTCTCCTGAGAGAATATTTACTGGTACGATTGTGGGAAGTGGAGATCTATCTTCACAATGGCCAGCTTCTAAATGGAGGTCATTGCAGGTACAATGGGATGAGCCAACAACAGTTCAGAGACCAGATAAAGTCTCACCATGGGAGATAGAGCCTTTCTTGGCAACTTCCCCAATTTCAACTCCTGCTCAACAACCACAATCGAAATGCAAGCGGTCAAGACCCATCGAGCCATCAGTTAAAACACCAGCCCCACCTAGTTTCTTGTACAGCCTCCCTCAGAGCCAAGATTCCATTAATGCATCCCTTAAACTGTTTCAAGATCCATCACTTGAGAGAATTTCAGGTGGATACTCCTCAAACAACAGCTTCAAACCCGAGACTCCTCCTCCTCCAACGAATTGTAGCTATAGGTTGTTTGGATTTGATCTCACAAGCAATTCTCCTGCTCCAATCCCTCAAGACAAGCAACCGATGGATACTTGTGGAGCTGCCAAGTGTCAAGAACCCATCACTCCAACCTCAATGAGTGAGCAGAAGAAGCAACAAACATCAAGAAGTCGAACTAAAGTGCAAATGCAAGGCATTGCGGTTGGTCGTGCGGTTGATTTAACACTGTTGAAATCTTACGATGAACTGATTGATGAGCTTGAGGAGATGTTTGAGATTCAAGGACAGCTTCTTGCCCGAGACAAATGGATCGTTGTCTTCACTGATGATGAAGGAGATATGATGCTTGCTGGTGATGATCCGTGGAATGAGTTTTGCAAGATGGCAAAGAAGATATTTATATATTCGAGCGATGAGGTTAAGAAAATGACAACGAAACTGAAGATTTCTTCGTCGTTAGAGAATGAGGAATATGGTAATGAATCATTCGAAAATCGTAGTAGGGGGTGA
>AT4G23980.1
ATGGCAAATCGCGGAGGTGAATATCTGTACGATGAGTTATGGAAATTATGCGCGGGACCTCTTGTTGATGTTCCTCAAGCTCAAGAAAGAGTTTATTATTTTCCTCAAGGTCACATGGAACAACTCGAAGCGTCAACGCAACAAGTCGACTTAAATACGATGAAGCCTCTTTTTGTTCTTCCTCCTAAGATTCTCTGCAATGTTATGAACGTTAGTCTTCAGGCGGAGAAAGATACGGATGAGGTCTATGCTCAGATTACTTTGATCCCTGTTGGAACTGAAGTTGATGAACCTATGAGTCCTGATCCCTCTCCTCCTGAGTTGCAAAGGCCGAAAGTTCACTCTTTCAGCAAGGTTTTGACAGCGTCTGATACAAGCACCCATGGTGGCTTTTCTGTTCTAAGGAAACATGCCACGGAATGTCTTCCTCCGCTGGATATGACTCAGCAAACCCCGACCCAGGAGTTAGTAGCCGAAGATGTGCACGGTTATCAGTGGAAATTCAAGCATATTTTTAGAGGCCAACCACGGAGGCATCTATTGACGACAGGGTGGAGCACCTTTGTTACATCAAAGAGATTGGTTGCTGGGGACACCTTTGTATTCCTGAGAGGGGAGAACGGAGAGTTGCGAGTTGGAGTCAGACGTGCTAATCTTCAACAGAGCAGTATGCCTTCATCCGTTATATCAAGTCATAGTATGCATCTGGGAGTGCTTGCTACTGCACGCCATGCTACTCAAACGAAAACTATGTTCATTGTATACTATAAACCAAGGACAAGCCAATTCATCATTAGCTTGAACAAATATCTAGAAGCCATGAGCAATAAGTTCTCTGTAGGGATGAGATTTAAGATGCGTTTTGAGGGAGAGGATTCCCCTGAAAGAAGATATTCTGGCACGGTTATTGGTGTGAAAGACTGCTCCCCTCACTGGAAAGACTCAAAATGGCGATGCTTAGAAGTTCATTGGGATGAGCCTGCATCGATTTCAAGACCCAATAAGGTTTCACCATGGGAAATTGAACCGTTTGTAAATTCAGAAAACGTTCCCAAATCAGTTATGCTGAAGAACAAAAGGCCCCGTCAAGTTAGTGAAGTATCTGCACTTGATGTAGGCATAACAGCTTCAAACCTTTGGAGCTCTGTTTTGACGCAACCCCATGAGTTTGCACAATCGTGCATCACCTCACAGTGGAGTTCTCCTCAGCAATGTCATCGTGATGCAAATGAGGATGCTAAGAAATCTGACTGGCTAAATAACTCTTACTCTGTGTCAAATGTAGCAAAAGACTCAACACTGAACGACCAAATGGTTTCCCCAGTCGAGCAGAAGAAGCCTGAGACAACCGCTAATTATAGATTATTTGGAATTGATCTGATGAGTTCCTCCCTAGCGGTTCCTGAGGAGAAAACTGCACCCATGCGACCAATCAACATATCCAAACCGACTATGGACAGCCACTCAGACCCAAAATCAGAGATTTCAAAAGTATCAGAAGAGAAAAAGCAGGAACCTGCGGAGGGATCACCAAAAGAGGTCCAAAGCAAGCAAAGCAGTTCTACAAGAAGCCGTACCAAGGTGCAGATGCAAGGCGTACCTGTGGGCAGGGCTGTGGATTTAAATGCGCTAAAGGGGTACAACGAGCTCATAGATGACATTGAGAAGCTGTTTGACATAAAAGGGGAACTGCGGAGTCGCAATCAATGGGAAATAGTGTTCACAGACGATGAGGGAGATATGATGCTTGTCGGTGATGACCCATGGCCTGAGTTCTGCAACATGGTGAAGAGAATATTCATATGGTCGAAAGAGGAAGTGAAGAAAATGACGCCTGGGAACCAACTCCGGATGCTGTTAAGGGAAGTTGAAACAACACTAACAACAACTTCCAAAACAGATAATCATTCCAACTAA
>AT4G30080.1
ATGATAAATGTGATGAATCCAATGAAAGGTGGAACAGAGAAAGGTTTAGATCCTCAGCTATGGCATGCATGTGCTGGTGGTATGGTTCGTATGCCTCCTATGAACTCTAAAGTCTTTTACTTTCCTCAAGGTCACGCCGAAAACGCTTACGATTGTGTCGATTTCGGTAATCTCCCTATTCCTCCCATGGTTTTGTGTCGTGTTTTAGCCATTAAGTATATGGCTGATGCTGAATCTGACGAGGTTTTCGCTAAACTGAGATTGATTCCTTTGAAAGATGATGAGTATGTTGATCACGAGTATGGTGATGGTGAAGATAGTAACGGTTTCGAGAGTAATAGTGAGAAAACGCCTTCGTTTGCTAAGACTTTGACTCAGTCTGATGCTAATAACGGTGGGGGTTTCTCTGTTCCTCGTTATTGCGCTGAGACGATTTTCCCGAGGTTGGATTATAACGCCGAGCCGCCGGTTCAGACCATTCTTGCTAAGGATGTTCATGGTGATGTTTGGAAGTTCAGACATATTTATAGAGGGACGCCTCGGCGTCACCTTCTTACAACCGGATGGAGTAATTTTGTAAACCAGAAGAAGCTTGTGGCGGGAGATTCGATTGTCTTCATGAGAGCGGAGAATGGAGATCTTTGTGTAGGTATTAGGAGGGCTAAGAGAGGAGGGATAGGTAATGGACCCGAATATTCAGCGGGTTGGAATCCGATCGGTGGAAGTTGCGGCTACTCTTCTCTGTTAAGGGAAGATGAAAGCAATAGTTTGAGGAGAAGTAATTGTTCCCTTGCGGATAGGAAGGGGAAAGTGACGGCTGAATCTGTTATAGAAGCAGCCACTCTTGCTATTAGCGGAAGACCGTTTGAGGTTGTGTACTATCCGAGAGCTAGCACTTCAGAGTTTTGTGTCAAGGCATTAGATGCTCGAGCTGCCATGCGGATTCCGTGGTGCTCAGGTATGAGGTTTAAGATGGCTTTTGAGACAGAGGATTCGTCTCGGATAAGTTGGTTTATGGGGACTGTTTCAGCTGTTAATGTCTCTGATCCTATCCGTTGGCCTAACTCTCCTTGGCGGCTTCTACAGGTGGCGTGGGATGAGCCAGATTTACTCCAAAACGTGAAGCGAGTTAACCCGTGGTTGGTGGAATTGGTATCAAACGTACATCCGATCCCGCTTACTTCGTTTTCGCCACCGAGGAAAAAGATGCGGCTACCTCAGCATCCAGATTACAACAATCTGATCAATTCGATTCCAGTACCTTCATTCCCAAGCAATCCCCTTATTAGATCAAGCCCGTTAAGCTCTGTTCTGGACAATGTTCCCGTGGGTTTACAGGGAGCCAGGCATAATGCTCATCAGTACTACGGGTTATCATCTTCGGATCTTCACCATTACTACTTGAATAGACCACCTCCTCCTCCTCCTCCATCCTCTCTCCAACTTTCTCCTTCTCTCGGTCTCCGAAACATCGATACCAAAAACGAAAAAGGATTTTGCTTTTTGACAATGGGAACAACACCATGCAATGATACCAAATCTAAAAAGTCCCATATTGTATTGTTCGGCAAGCTTATACTACCCGAGGAACAGCTATCAGAAAAAGGCTCAACGGATACCGCAAACATAGAGAAAACGCAGATTTCATCAGGCGGGTCGAACCAAAACGGCGTTGCGGGAAGGGAGTTTTCTTCGTCAGATGAAGGATCACCTTGCTCTAAGAAAGTTCATGATGCATCAGGTTTGGAAACAGGGCATTGTAAAGTGTTTATGGAGTCAGACGATGTAGGTCGAACCTTAGACCTATCGGTTCTTGGTTCATACGAAGAATTGAGTCGGAAACTCTCTGACATGTTTGGAATCAAAAAGTCTGAGATGTTAAGCTCTGTTCTCTATAGGGATGCATCAGGAGCCATCAAATACGCAGGAAACGAACCTTTCAGTGAGTTCTTGAAGACAGCTCGAAGATTGACAATTCTGACGGAACAAGGAAGTGAGAGCGTTGTAGTATAA
>AT5G20730.1
ATGAAAGCTCCTTCATCAAATGGAGTTTCTCCTAATCCTGTTGAAGGAGAAAGGAGAAATATAAACTCAGAGCTATGGCACGCTTGTGCTGGGCCATTGATTTCGTTGCCTCCAGCAGGAAGTCTTGTTGTTTACTTCCCTCAAGGTCACAGTGAGCAAGTCGCGGCTTCAATGCAGAAGCAGACTGATTTCATACCAAGTTACCCGAATCTTCCTTCCAAGCTCATATGCATGCTCCACAATGTTACACTGAATGCTGATCCTGAGACGGATGAGGTCTATGCGCAGATGACTCTTCAGCCAGTAAACAAATATGACAGAGATGCATTGCTTGCTTCTGACATGGGTCTTAAGCTAAACAGACAACCTAATGAATTTTTCTGCAAAACCCTCACGGCGAGTGACACAAGTACTCACGGTGGATTTTCTGTACCCCGACGAGCTGCTGAGAAAATCTTTCCTGCTCTGGATTTCTCGATGCAACCACCTTGTCAGGAGCTTGTTGCTAAGGATATTCATGACAACACATGGACTTTCAGACATATTTATCGAGGTCAACCAAAAAGGCACTTGCTAACTACAGGCTGGAGTGTGTTTGTCAGCACGAAAAGGCTCTTTGCTGGAGACTCTGTTCTTTTTATAAGAGATGGAAAGGCGCAACTTCTGTTGGGGATAAGACGTGCAAATAGACAACAGCCTGCACTTTCTTCATCTGTAATATCAAGTGATAGCATGCACATCGGAGTTCTTGCAGCTGCAGCTCATGCTAATGCTAATAACAGTCCTTTCACCATTTTCTACAACCCGAGGTGGGCTGCTCCTGCTGAGTTTGTGGTTCCTTTAGCCAAGTATACCAAAGCGATGTACGCTCAAGTTTCCCTCGGTATGCGGTTTAGAATGATATTTGAGACTGAAGAATGTGGAGTTCGTCGGTATATGGGTACAGTTACCGGTATCAGTGATCTTGATCCAGTGAGATGGAAAAACTCTCAGTGGCGGAATCTTCAGATTGGATGGGATGAGTCAGCTGCTGGTGATAGGCCCAGTCGAGTTTCAGTTTGGGACATTGAACCGGTTTTAACTCCTTTCTACATATGTCCTCCTCCATTTTTCCGACCTCGCTTTTCTGGACAACCTGGAATGCCAGATGATGAGACTGACATGGAGTCTGCACTGAAGAGAGCAATGCCATGGCTTGATAATAGCTTAGAGATGAAAGACCCTTCGAGTACTATCTTTCCTGGTCTGAGTTTAGTTCAGTGGATGAATATGCAGCAGCAGAACGGCCAGCTACCCTCTGCTGCTGCACAGCCAGGTTTCTTCCCATCAATGCTTTCGCCAACCGCGGCGCTGCACAACAATCTTGGCGGCACTGATGATCCCTCCAAGTTACTGAGCTTTCAGACGCCGCACGGGGGGATTTCCTCCTCAAATCTCCAATTTAACAAACAGAATCAGCAAGCCCCAATGTCTCAGTTGCCTCAGCCACCAACTACGTTGTCCCAACAACAGCAGCTGCAGCAATTGTTGCACTCCTCTTTGAACCATCAACAACAGCAATCGCAGTCTCAACAACAGCAACAACAACAACAGTTGCTGCAGCAGCAACAACAATTGCAGTCTCAACAACACAGCAACAACAATCAATCGCAGTCTCAGCAACAACAACAATTGCTCCAGCAGCAACAACAACAACAACTGCAGCAACAACATCAACAACCGTTACAGCAACAGACTCAGCAGCAGCAGCTAAGAACACAGCCATTGCAATCTCACTCGCATCCACAGCCACAACAGTTACAACAACATAAGTTGCAGCAACTTCAGGTTCCACAGAATCAGCTTTACAATGGTCAACAAGCAGCGCAGCAGCATCAGTCGCAACAAGCATCTACACATCATTTGCAACCACAATTAGTTTCGGGATCAATGGCAAGCAGTGTCATCACGCCTCCGTCCAGCTCCCTTAATCAAAGCTTTCAACAGCAACAACAACAGTCTAAGCAACTTCAACAAGCACATCACCATTTAGGTGCTAGCACTAGCCAGAGTAGTGTAATTGAAACCAGCAAGTCTTCATCCAATCTGATGTCCGCACCGCCGCAAGAGACACAGTTTTCACGACAAGTAGAACAGCAGCAGCCTCCTGGTCTCAACGGGCAGAATCAGCAAACACTTTTGCAGCAGAAAGCTCACCAGGCACAGGCCCAACAGATATTCCAGCAGAGTCTCTTGGAACAGCCGCATATACAGTTTCAGCTGTTACAGAGATTACAACAGCAACAGCAGCAGCAATTTCTTTCGCCGCAGTCTCAGTTACCACACCATCAATTGCAAAGCCAGCAGTTGCAACAGCTGCCTACTCTCTCTCAAGGTCATCAGTTTCCGTCATCTTGCACTAACAATGGCTTATCGACGTTGCAACCACCTCAAATGCTGGTGAGCCGACCTCAGGAAAAACAAAACCCACCGGTTGGGGGAGGGGTCAAAGCTTATTCAGGCATCACAGATGGAGGAGATGCACCTTCCTCTTCAACGTCGCCTTCCACCAACAACTGTCAGATCTCTTCTTCAGGCTTTCTCAACAGAAGCCAAAGCGGGCCAGCGATCTTGATACCTGATGCAGCGATTGATATGTCTGGTAATCTTGTTCAGGATCTTTACAGCAAATCCGATATGCGGCTAAAACAAGAACTCGTGGGTCAGCAAAAGTCCAAAGCTAGTTTAACAGATCATCAACTAGAAGCATCTGCCTCTGGAACTTCTTACGGTTTAGATGGAGGCGAAAACAACAGACAACAAAATTTCTTGGCTCCAACTTTTGGCCTTGACGGTGATTCCAGGAACAGCTTGCTCGGTGGAGCTAATGTTGATAATGGCTTTGTGCCTGACACGCTACTCTCGAGGGGATATGACTCCCAGAAAGATCTTCAGAACATGCTTTCAAACTATGGAGGAGTGACAAATGACATTGGTACAGAGATGTCTACTTCAGCTGTAAGAACTCAATCTTTTGGTGTCCCCAATGTGCCCGCCATTTCGAACGATCTAGCTGTCAACGATGCTGGAGTTCTTGGTGGTGGATTGTGGCCAGCTCAGACTCAGCGAATGCGAACTTATACAAAGGTGCAAAAACGAGGCTCAGTGGGGAGATCAATAGACGTCAACCGTTACAGAGGTTACGATGAGCTGAGGCATGATCTAGCGCGCATGTTTGGGATCGAAGGACAGCTCGAAGATCCTCAAACATCTGACTGGAAACTTGTTTATGTCGATCATGAAAATGACATCCTCCTCGTCGGCGATGATCCATGGGAAGAATTCGTAAACTGTGTTCAGAGCATTAAGATCCTTTCATCAGCTGAGGTTCAGCAGATGAGCTTAGACGGGAACTTTGCCGGTGTACCAGTTACTAATCAAGCTTGTAGTGGCGGTGACAGTGGCAATGCTTGGAGAGGTCATTATGATGATAACTCAGCCACTTCGTTTAACCGGTGA
>AT5G37020.1
ATGAAGCTGTCAACATCTGGATTGGGTCAACAGGGTCATGAAGGAGAGAAGTGTCTGAATTCTGAGCTATGGCATGCTTGTGCTGGACCATTAGTCTCTCTTCCATCATCTGGTAGTCGAGTTGTTTACTTTCCACAGGGTCACAGTGAACAGGTAGCTGCTACAACTAATAAGGAAGTTGATGGTCACATACCCAATTACCCAAGCCTACCACCACAATTGATATGCCAGCTCCATAATGTTACAATGCATGCAGATGTTGAGACGGATGAAGTCTATGCTCAAATGACACTTCAACCATTGACACCGGAGGAGCAGAAGGAAACATTTGTACCGATTGAGTTGGGGATACCGAGTAAGCAACCTAGTAATTATTTTTGTAAGACTCTCACAGCTAGTGATACCAGTACACATGGAGGGTTTTCTGTTCCTAGACGTGCTGCTGAGAAAGTGTTTCCTCCATTGGATTACACACTGCAGCCACCAGCTCAAGAACTGATTGCAAGGGATCTCCATGATGTTGAATGGAAGTTTAGGCATATCTTTCGGGGACAGCCCAAACGGCATCTCCTAACTACTGGATGGAGTGTCTTTGTCAGTGCCAAGCGACTAGTAGCTGGAGATTCTGTCATTTTCATCAGGAATGAAAAGAATCAACTCTTTTTGGGAATTCGTCATGCCACTCGGCCGCAGACTATTGTACCATCATCTGTTTTATCTAGTGATAGCATGCATATTGGACTCCTTGCTGCTGCTGCACATGCTTCTGCAACTAATAGCTGTTTCACTGTTTTCTTTCATCCAAGGGCTAGCCAATCTGAGTTTGTGATACAACTTTCCAAGTACATTAAAGCCGTTTTTCACACGCGTATTTCAGTTGGGATGCGCTTTCGCATGCTCTTCGAGACAGAAGAGTCGAGTGTCCGCAGGTACATGGGTACTATAACTGGTATTAGTGATCTAGATTCTGTTCGTTGGCCAAACTCTCATTGGCGATCTGTGAAGGTTGGTTGGGATGAATCGACTGCAGGGGAGAGACAGCCAAGGGTTTCTTTATGGGAGATTGAGCCTCTGACTACCTTTCCTATGTATCCATCTCTTTTTCCTCTCAGACTAAAACGTCCATGGCATGCTGGCACATCATCTTTGCCTGATGGAAGGGGTGATTTGGGAAGTGGTCTAACATGGCTAAGAGGGGGAGGTGGAGAGCAGCAAGGTTTGCTTCCTCTAAATTATCCATCTGTTGGTTTGTTTCCATGGATGCAACAAAGGCTGGATCTCAGTCAAATGGGGACTGATAATAATCAGCAATACCAAGCAATGTTAGCTGCTGGGTTGCAGAACATCGGCGGTGGAGATCCTTTAAGACAGCAGTTTGTACAGCTGCAAGAGCCTCACCACCAATATCTTCAACAATCAGCTTCCCATAATTCTGATTTGATGCTTCAGCAGCAACAGCAGCAACAAGCGTCACGCCATCTCATGCATGCTCAAACACAGATTATGAGTGAGAATCTTCCGCAGCAGAATATGCGACAAGAAGTTAGTAACCAACCAGCTGGACAGCAGCAACAGCTACAGCAACCGGACCAAAATGCATATCTTAATGCTTTCAAAATGCAAAATGGCCATCTTCAACAGTGGCAGCAGCAATCAGAGATGCCATCTCCCTCGTTCATGAAGTCAGATTTTACTGACTCAAGCAACAAATTTGCAACAACTGCTAGTCCGGCTTCTGGAGATGGCAATCTTTTGAATTTTTCTATAACCGGTCAGTCTGTACTCCCTGAGCAGTTAACAACAGAGGGCTGGTCTCCAAAAGCATCCAACACTTTTTCTGAACCGTTGTCACTTCCACAAGCCTATCCTGGGAAGAGTCTTGCTCTAGAACCCGGAAATCCGCAGAATCCCTCTCTTTTCGGTGTTGATCCCGACTCTGGACTCTTCCTCCCCAGTACGGTTCCCCGCTTTGCTTCTTCATCAGGAGATGCTGAAGCTTCCCCTATGTCACTAACAGATTCAGGATTTCAGAATTCCTTATATAGCTGCATGCAAGACACAACTCATGAGTTATTGCATGGAGCTGGACAGATTAACTCGTCCAACCAAACCAAGAACTTTGTAAAGGTTTATAAATCTGGTTCGGTTGGGCGTTCATTAGACATCTCCCGATTCAGCAGCTACCACGAGCTGCGAGAAGAGTTAGGGAAGATGTTTGCTATCGAAGGGTTGTTGGAAGACCCCCTTAGATCAGGCTGGCAGCTTGTATTCGTTGACAAGGAAAATGATATTCTTCTCCTTGGTGATGACCCATGGGAGTCATTTGTGAATAACGTTTGGTACATAAAGATACTATCACCAGAAGATGTGCATCAAATGGGAGATCATGGAGAAGGCAGTGGTGGGTTATTCCCGCAAAACCCGACCCATCTCTAG
>AT5G60450.1
ATGGAATTTGACTTGAATACTGAGATTGCGGAGGTGGAAGAGGAGGAGAATGATGATGTAGGAGTAGGAGTAGGAGGAGGAACAAGAATTGACAAGGGTAGGCTTGGAATTTCACCATCTTCTTCTTCTTCATGCTCTTCCGGATCATCATCGTCATCATCTTCTACAGGCTCTGCATCTTCCATTTACTCTGAGCTTTGGCATGCTTGTGCTGGTCCTCTCACTTGTCTTCCCAAGAAAGGCAATGTAGTTGTCTATTTCCCTCAAGGTCATTTGGAGCAAGATGCTATGGTTTCATATTCGTCTCCTCTTGAAATCCCCAAATTTGACCTTAATCCCCAAATCGTCTGCAGGGTGGTTAATGTCCAGTTGCTTGCTAATAAGGACACCGATGAGGTCTACACTCAAGTCACTCTGCTTCCACTTCAAGAGTTTTCGATGCTAAATGGGGAGGGGAAAGAGGTCAAGGAGTTAGGAGGGGAGGAAGAGAGGAACGGAAGCTCATCCGTCAAGCGGACACCTCATATGTTCTGTAAAACCTTAACAGCGTCTGACACAAGCACACATGGAGGCTTCTCTGTACCTAGAAGAGCCGCTGAAGATTGTTTTGCTCCTCTTGACTACAAACAACAGAGGCCATCTCAAGAGCTCATTGCAAAGGACCTCCATGGAGTAGAGTGGAAGTTTCGCCATATCTATAGAGGTCAACCAAGGAGGCATCTACTCACCACTGGTTGGAGTATCTTTGTCAGTCAAAAGAATCTCGTCTCTGGTGATGCGGTTCTCTTTCTGAGAGACGAAGGAGGAGAGCTGAGATTAGGAATCAGAAGAGCAGCACGGCCAAGAAATGGACTTCCTGACTCAATCATTGAGAAGAATTCATGTTCAAACATTCTGTCTCTTGTGGCTAATGCTGTATCTACAAAAAGCATGTTTCATGTGTTCTACAGTCCACGAGCGACGCATGCAGAGTTTGTGATTCCTTATGAGAAGTATATCACAAGCATCAGGAGTCCTGTTTGCATAGGCACAAGATTTAGAATGCGATTTGAAATGGACGATTCTCCTGAGAGAAGATGCGCTGGTGTAGTGACTGGAGTCTGTGACTTGGACCCGTATAGGTGGCCAAACTCTAAATGGAGGTGCTTGTTGGTGCGATGGGATGAGTCTTTTGTGAGTGATCATCAAGAAAGAGTTTCACCTTGGGAGATTGATCCCTCGGTTTCTCTCCCACACTTGAGCATTCAGTCATCTCCAAGGCCTAAAAGGCCATGGGCAGGTTTACTGGATACTACCCCACCCGGAAACCCCATAACAAAAAGGGGTGGTTTTTTGGACTTTGAGGAGTCGGTTAGACCCTCTAAGGTCTTGCAAGGTCAAGAAAATATAGGTTCTGCATCACCCTCACAGGGGTTTGATGTTATGAACCGCCGGATACTGGATTTTGCGATGCAGTCTCATGCAAATCCAGTTCTTGTGTCGAGTAGAGTCAAGGATCGATTTGGTGAGTTTGTAGATGCTACTGGCGTGAACCCAGCTTGTTCAGGTGTTATGGACCTGGATAGGTTTCCAAGGGTCTTGCAAGGTCAAGAAATTTGCTCGCTTAAATCATTCCCGCAATTTGCTGGTTTCAGTCCAGCTGCTGCTCCTAATCCCTTTGCTTACCAAGCCAACAAGTCAAGTTACTATCCGCTAGCTTTGCATGGGATTAGGAGCACTCATGTTCCGTATCAGAATCCATACAATGCGGGAAACCAATCCTCGGGTCCCCCTTCACGTGCAATAAACTTTGGTGAAGAGACTAGAAAGTTTGATGCACAAAATGAAGGTGGCCTACCAAATAATGTTACAGCTGATTTGCCATTCAAGATTGATATGATGGGAAAACAGAAAGGCAGTGAGTTGAATATGAATGCTTCATCAGGATGTAAACTTTTCGGATTCTCCTTACCAGTGGAGACACCTGCATCTAAGCCGCAAAGCTCGAGCAAAAGAATCTGTACAAAGGTTCACAAGCAAGGAAGCCAAGTGGGGAGAGCTATTGATTTGTCGCGACTTAACGGGTATGATGATCTCCTTATGGAGCTTGAACGGCTGTTCAACATGGAAGGGCTTCTCAGGGATCCTGAAAAAGGATGGAGGATCTTATATACTGATAGTGAGAACGATATGATGGTCGTTGGCGATGATCCATGGCATGATTTCTGCAATGTGGTGTGGAAGATACACTTATACACGAAAGAGGAAGTGGAGAATGCGAATGACGATAACAAGAGTTGTTTAGAGCAAGCTGCTCTCATGATGGAAGCATCAAAGTCATCTTCTGTGAGCCAGCCTGATTCTTCTCCTACAATCACTAGGGTTTGA
>AT5G62000.1
ATGGCGAGTTCGGAGGTTTCAATGAAAGGTAATCGTGGAGGAGATAACTTCTCCTCCTCTGGTTTTAGTGACCCTAAGGAGACTAGAAATGTCTCCGTCGCCGGCGAGGGGCAAAAAAGTAATTCTACCCGATCCGCTGCGGCTGAGCGTGCTTTGGACCCTGAGGCTGCTCTTTACAGAGAGCTATGGCACGCTTGTGCTGGTCCGCTTGTGACGGTTCCTAGACAAGACGACCGAGTCTTCTATTTTCCTCAAGGACACATCGAGCAGGTGGAGGCTTCGACGAACCAGGCGGCAGAACAACAGATGCCTCTCTATGATCTTCCGTCAAAGCTTCTCTGTCGAGTTATTAATGTAGATTTAAAGGCAGAGGCAGATACAGATGAAGTTTATGCGCAGATTACTCTTCTTCCTGAGGCTAATCAAGACGAGAATGCAATTGAGAAAGAAGCGCCTCTTCCTCCACCTCCGAGGTTCCAGGTGCATTCGTTCTGCAAAACCTTGACTGCATCCGACACAAGTACACATGGTGGATTTTCTGTTCTTAGGCGACATGCGGATGAATGTCTCCCACCTCTGGATATGTCTCGACAGCCTCCCACTCAAGAGTTAGTTGCAAAGGATTTGCATGCAAATGAGTGGCGATTCAGACATATATTCCGGGGTCAACCACGGAGGCATTTGCTACAGAGTGGGTGGAGTGTGTTTGTTAGCTCCAAAAGGCTAGTTGCAGGCGATGCGTTTATATTTCTAAGGGGCGAGAATGGAGAATTAAGAGTTGGTGTAAGGCGTGCGATGCGACAACAAGGAAACGTGCCGTCTTCTGTTATATCTAGCCATAGCATGCATCTTGGAGTACTGGCCACCGCATGGCATGCCATTTCAACAGGGACTATGTTTACAGTCTACTACAAACCCAGGACGAGCCCATCTGAGTTTATTGTTCCGTTCGATCAGTATATGGAGTCTGTTAAGAATAACTACTCTATTGGCATGAGATTCAAAATGAGATTTGAAGGCGAAGAGGCTCCTGAGCAGAGGTTTACTGGCACAATCGTTGGGATTGAAGAGTCTGATCCTACTAGGTGGCCAAAATCAAAGTGGAGATCCCTCAAGGTGAGATGGGATGAGACTTCTAGTATTCCTCGACCTGATAGAGTATCTCCGTGGAAAGTAGAGCCAGCTCTTGCTCCTCCTGCTTTGAGTCCTGTTCCAATGCCTAGGCCTAAGAGGCCCAGATCAAATATAGCACCTTCATCTCCTGACTCTTCGATGCTTACCAGAGAAGGTACAACTAAGGCAAACATGGACCCTTTACCAGCAAGCGGACTTTCAAGGGTCTTGCAAGGTCAAGAATACTCGACCTTGAGGACGAAACATACTGAGAGTGTAGAGTGTGATGCTCCTGAGAATTCTGTTGTCTGGCAATCTTCAGCGGATGATGATAAGGTTGACGTGGTTTCGGGTTCTAGAAGATATGGATCTGAGAACTGGATGTCCTCAGCCAGGCATGAACCTACTTACACAGATTTGCTCTCCGGCTTTGGGACTAACATAGATCCATCCCATGGTCAGCGGATACCTTTTTATGACCATTCATCATCACCTTCTATGCCTGCAAAGAGAATCTTGAGTGATTCAGAAGGCAAGTTCGATTATCTTGCTAACCAGTGGCAGATGATACACTCTGGTCTCTCCCTGAAGTTACATGAATCTCCTAAGGTACCTGCAGCAACTGATGCGTCTCTCCAAGGGCGATGCAATGTTAAATACAGCGAATATCCTGTTCTTAATGGTCTATCGACTGAGAATGCTGGTGGTAACTGGCCAATACGTCCACGTGCTTTGAATTATTATGAGGAAGTGGTCAATGCTCAAGCGCAAGCTCAGGCTAGGGAGCAAGTAACAAAACAACCCTTCACGATACAAGAGGAGACAGCAAAGTCAAGAGAAGGGAACTGCAGGCTCTTTGGCATTCCTCTGACCAACAACATGAATGGGACAGACTCAACCATGTCTCAGAGAAACAACTTGAATGATGCTGCGGGGCTTACACAGATAGCATCACCAAAGGTTCAGGACCTTTCAGATCAGTCAAAAGGGTCAAAATCAACAAACGATCATCGTGAACAGGGAAGACCATTCCAGACTAATAATCCTCATCCGAAGGATGCTCAAACGAAAACCAACTCAAGTAGGAGTTGCACAAAGGTTCACAAGCAGGGAATTGCACTTGGCCGTTCAGTGGATCTTTCAAAGTTCCAAAACTATGAGGAGTTAGTCGCTGAGCTGGACAGGCTGTTTGAGTTCAATGGAGAGTTGATGGCTCCTAAGAAAGATTGGTTGATAGTTTACACAGATGAAGAGAATGATATGATGCTTGTTGGTGACGATCCTTGGCAGGAGTTTTGTTGCATGGTTCGCAAAATCTTCATATACACGAAAGAGGAAGTGAGGAAGATGAACCCGGGGACTTTAAGCTGTAGGAGCGAGGAAGAAGCAGTTGTTGGGGAAGGATCAGATGCAAAGGACGCCAAGTCTGCATCAAATCCTTCATTGTCCAGCGCTGGGAACTCTTAA
>ATMG00940.1
ATGAGGAAATCGGCTGATGAGATGTTTATTGGTGTAAGGCGAGCACCAATCTCTAGTAACGTCGGAGGAACAAGCTTCTACGGCGGAGATGAGTACTGTAGTTATTATCAGAGCAATGGAGGCGTTGCTAAGGAAGACGACGGAAGTGCGAAGAAGGGGTTTAGGAGGACTGGGAAAGGGAAATTGACGGCTGAAGCTGTCTCTGAGGCGATTAATAGAGCAGCTCAGGGTTTGCCGTTTGAGGTGGTTTATTATCCTACGGCTGGATGGTCGGACTTTGTGGTGAAGGCAGAAGATGTTGAGGCTTCCATGGCTATATTCTGGACTCCTGGTACTAGAGTGAAGATGGCCATGGAGACTGAGGACTCTTCGCGGATTACTTGGTTTCAGGGGATTGTCTTCTATACATATCAGGAAACTGGTCCATGGCGTGGATCTCCTTGGAACAGCTTCAGGTATAAGATCCCCTTCACTATTCCCTTAATATTCCTCTGA
