# Supplementary material for: Whole-Genome Duplication and Purifying Selection Contributes to the Functional Redundancy of Auxin Response Factor (ARF) Genes in Foxtail Millet (Setaria italica L.)
Source: Int J Genomics. 2021 Aug 6;2021:2590665. doi: 10.1155/2021/2590665 (PMC8369178; doi:10.1155/2021/2590665)
Supplement: Supplementary Materials — See Figure S1-S2 and Table S1-S3 in the Supplementary Material 1. Figure S1: the ML phylogenetic tree constructed by ARF proteins from four plant species. Figure S2: intrinsic disorder and transcriptional activity prediction of SiARFs. Green indicated unstructured protein scores. Table S1: synonymous and nonsynonymous values of SiARF WGD duplicate pairs. Table S2: synonymous values of orthologous ARF gene pairs between S. italica and O. sativa and between S. italica and Z. mays. Table S3: primers used in the real-time quantitative PCR assay. See coding sequencing sequences of ARFs of four surveyed species in the Supplementary Material 2. See full-length amino acid sequences of ARFs of four surveyed species in the Supplementary Material 3. [file 2590665.f1.zip › Supplementary material 3.TXT]

#Si_Os_Zm_At_ARF_protein sequence
>Seita.1G077200.1
MKLSPSAAGGLQDQPASPEEAEENKCLNSELWHACAGPLVSLPAVGSRVVYFPQGHGEQVAASTNKEMESQIPNYPSLPPQLICQLHNVTMHADAETDEVYAQMTLQPLSPQELKDPFLPAELGGASKQPTNYFCKTLTASDTSTHGGFSVPRRAAEKVFPPLDFNQQPPAQELIAKDLHGNEWKFRHIFRGQPKRHLLTTGWSVFVSAKRLVAGDSVLFIWNDNNQLLLGIRRANRPQTVMPSSVLSSDSMHIGLLAAAAHAASTNSRFTIFYNPRASPCEFVIPLAKYVKAVYHTRISVGMRFRMLFETEESSVRRYMGTITGISDLDPVRWPNSHWRSVKVGWDESTAGEKQPRVSLWEIEPLTTFPMYPSPFALGLKRPWPTGLPSLYGGRDDGLTSSLMWLRDGTNPSFQSLNFGGLGTSPSPWMQPRMDNSLLGLQSDMYQTIAAAAALQGTTKQISPSLMQFQQPQNIVGRSALLSNQIMQQVQPQFQQMYNQNINDNTVQGHTQAEYLQQQLQRCHSFSEQKPQLHPQQQRQESQQQQECVQTPQNQQLHCLPNALSAFSQLSSVTQSPSSTLPAVPAFSHQQNFADTNISALSPSGGSSMQGMLGQLPSDAPSSLPCVARNTPLSISDPWSSKRVAVESVNPSRPHVVSAQIEQLDMTPCNLPQNSALAPLPGRGCLVDQDESSDPQNHLLFGVNIDSQSLLMQGGIPGHQNDNDSSTIPYSTSNFLSPSQNDFPLGQPLPSTGCLDESSYVPSAENSEQANQQFATFVKVYKSGTVGRLLDITRFSSYDELRSEVGRLFGLEGQLEDPLRSGWQLVFVDGEDDVLLVGDDPWQEFVNSVSCIKILSLEEVQQMGKQGIELLSSAPARRLSNGCDSYVSRQESKNLSTGMTPVGSVEF*
>Seita.1G090900.1
MKQSPASSGVAPAAAAASAGGAPPEGERKAPAINADLWYACAGPLVSLPPVGSLVVYFPQGHSEQVAASMQKDIDAHVPSYPNLPSKLICLLHSVTLHADPDTDEVYAQMTLQPVNTYGKEALQLSELALKHARPQMEFFCKTLTASDTSTHGGFSVPRRAAEKILPPLDFNMQPPAQELQARDIHDTVWTFRHIFRGQPKRHLLTTGWSLFVGGKRLFAGDSVIFVRDERQQLLLGIRRASRQPTNISSSVLSSDSMHIGVLAAAAHAAANNSPFTIFYNPRASPTEFVIPFAKYQKALYSNQISLGMRFRMMFETEELGMRRYMGTITGISDLDPVRWKNSQWRNLQVGWDESAAGERRNRVSMWEIEPIAAPFFICPQPFFGVKRPRQLDDESSEMENLFKRAMPWLGEEICIKDAQTQNTTMPGLSLVQWMNMNRQQNSTLANTGIQSEYLRSLSNPAMQNLGATELARQLYVQNHLLQQNSAQLNASKLPQQMQPINELSKGVLSFNQLDVITNQEQKQEAGNQQRQQQASNQAIPLSQAQASLAQAQVIIQNQMQQQQQQHLSPTKNEQGTSDQQLLLSQQQQDQNLQLQQHQQLLLQQLQRQQQHNQQLNKLPGQLVNLAGQQTQLSDQELQLQLLQKLQQQALISQPAVTLSRLPLIQEQQKLLLDMQQLSGSRSLAQQRIMPQQDSKVSLQASPSPPPMKPEQQQKLSQKQVALADMSDVAFPSITPTNVVSKAGSSLMIPGAAQSVLTEELPSCSTSPSTANGNHLAHPNIGRNDHCKVNTEKVPQSSALMSIPTSVEAVTAAPVMAKELLNHNVKENVITSKSPTCGTGPDNLLNIVPSTDNLETASSATSLWPTQTDGLLHQGFPTSNFNQQQMFKDALPDVEIQDVDPTNNAFFGISNDGPLGFPMETEGLLVSALNPVKCQTHMSTDVENNYRIQKDAQQEISTSMVSQSFGQSDIAFNSIDSAINDGALLNRNSWPPAPPPQRMRTFTKVYKRGAVGRSIDIGRYAGYEELKHALARMFGIEGQLEDRQRIGWKLVYKDHEDDILLLGDDPWEEFVNCVKCIRILSPQEVQQMSLDGDLGNNVLSNQACSSSDGGNAWRPRCDQNPGNPSIGFYDQFE*
>Seita.1G195500.1
MANAGAGAGGSGGVSDALFRELWHACAGPLVTVPRQGELVYYFPQGHMEQLEASTDQQLDQHLPLFNLPSKILCKVVNVELRAETDSDEVYAQIMLQPEADQNEPTSPNPEPPEPERCNVHSFCKTLTASDTSTHGGFSVLRRHAEECLPQLDMSQNPPWQELVAKDLHGNEWHFRHIFRGQPRRHLLTTGWSVFVSSKRLVAGDAFIFLRGENGELRVGVRRLMRQLTNMPSSVISSHSMHLGVLATASHAISTGTLFSVFYKPRTSRSEFVVSVNKYLEAKNHKMSVGMRFKMRFEGDESPERRFSGTIIGLGSMPANSTSPWADSDWRSLKVQWDEPSAVLRPDRVSPWELEPLDATNIQPPQPPLRNKRARPPASPSIAPELPPAFGFWKSPAEPTHAFSFSGLQRTQELYHSNPNSIFSSPLNEGFNSKNERSTPTNNHLYWPVRDMRTESYSASINKPPPERKQESVTAGCRLFGIEISNAVSPVVTAASVGQDQPPAVSVDVESDQLSQPSHANKTDAPAASSERSPHETESRQVRSCTKVIMQGMVVGRAVDLTRLDGYDDLLHKLEEMFDIQGELSASLKKWKVIYMDDEDDMMLVGDDPWHEFCIMVKKIYIYSYEEAKSLIPKAKLPVIGDTIKPNPDKLSPESDMPQSDSNNTAPVAADKD*
>Seita.1G241500.1
MQLHAPLNNWISTLSPTRAPSRYPGALSPTSRSPNGALISRNGVGLLLLVTVRTGASYTRHRPARLRLLHLRTPLSLLHRLSLAAVRASPMITFADLTEPAAAGADRCVDRQLWLACAGGMCTVPPVGTSVYYFPQGHAEHALGLAGAADLSAARIPALVPCRVAAVRYMADQDTDEVFARIRLVPLRAGEADAGLEDDPAADDEQEKPASFAKTLTQSDANNGGGFSVPRYCAETIFPRLDYAADPPVQTVVAKDVHGAAWKFRHIYRGTPRRHLLTTGWSTFVNQKKLVAGDSIVFLRGDGGDLHVGIRRAKRGFCGAGGGGGGGEEALPMPGWDHYAGMMRGNVSPCGSAKARGKVRPEDVAEAARLASAGQPFEVVYYPRASTPEFCVRVASVRAAMRVQWSPGMRFKMAFETEDSTRISWFMGTVAGVQVADPIRWPQSPWRLLQVTWDEPDLLQNVKRVSPWLVELVSSIPAIHLASFSPPRKKPRIPAYPEFPFEGQLLNPAFPPTPLSHGHHGHHYLHTHPSFFPFPDGSAPAAIQGARHAQFVPPLSDLHLTHLQSSLLYPGLRRPDHVGRAAPIPARISTDLTIGGAPARDDMSCALSIGADKKQPGGAKPAGLVLFGRTILTEQQMSLSGSAGATSPAATGNGYMNWNADKGPNASEGSGSGVIQNSPTKNASSSERPPWFTELAGLEPGQCKVFVESDTVGRNLDLSALGSFDELYGRLSEMFCIESAELRSRVLYRGAAGDVKHAGDEPFSVFVKSARRITILTDAGSDNLGS*
>Seita.3G003300.1
MAHHQPPPAAADDPIVDRDVWLACAIPLSRLPVVGAQVYYFPHGHAEQCPDHLPAPLPTPHLFPCTVTAVGLGADDKTNEVFAQISLQPGPHRGPPPPAPDAADLNLSFFAKQLTQSDANNGGGFSVPRHCADHIFPKLRFEDDPPVQNLVMRDPVGDHWQFRHIYRGTPRRHLLTTGWSKFVNAKLLVAGDTVVFMRRPDGELLIGLRRAPRYPVVARAADQPPPCNARARVPPGDVMEAARLAAEGSPFTVNYFPRQGAAEFVVPRKEVEDALASRWEPGTQVRMQVMEAEDARRTEWANGTLNKLHPNIWRALEIDWDDSSPFSLTRSRYVNAWQVQFVSFPPLLKRLRISDTMAPLCSGDVSSLAAPLIGPESQAMAILLGSPIPAGMQGARHDVPPSSSTLGMLTTQLLFPQLSSDLQMPPSVNSGGSSEILDPETGSPPNNSVNMPPAELPVEAKGIQLFGATINPHVVQRATNGASEEVNGAINGVVDENVGKDL*
>Seita.3G020000.1
MSSSSAASIGQPPPPAAPPEEEKKCLNSELWHACAGPLVCLPTVGTRVIYFPQGHSEQVAASTNKEVDGHIPNYPNLPPQLICQLHDVTMHADVETDEVYAQMTLQPLNPQEQNDAYLPAEMGIMSKQPTNYFCKTLTASDTSTHGGFSVPRRAAERVFPPLDFTQQPPAQELIARDIHDVEWKFRHIFRGQPKRHLLTTGWSVFVSAKRLVAGDSVLFIWNEKNQLLLGIRRASQPQTVMPSSVLSSDSMHIGLLAAAAHAAATNSRFTIFYNPRASPSEFVIPLSKYIKAVFHTRISVGMRFRMLFETEESSVRRYMGTITEVSDADPVRWPSSYWRSVKVGWDESTAGERPPRVSLWEIEPLTTFPMYPSLFPLRVKHPWYSGVAALHDDSNALMWLRGVAGEGGFQSFNFQSPGIGSWGQQRLHPSLLSNDHDQYQAVVAAAAASQSGGYLKQQFLHLQQPMQSPQEQCNLNPLLQQQIMQQASQQQLVSPDSQNIQSVLSPSAIQQQLHQLQQMQHAHNDQKQKIQPDQPYQVPTSAVLPSPTSLPSHLREKFGFSDPNVNSSSFISSSSNENMLESNFLQGSSKCVDLSRFNQPTVSEQQQQQQAWKQKFMGSQSMSFGGSVSLNSPTSKDGSVDNKVGRDVQNQSLFSPQVDNSSLLYNMVPNLTSNVVDNNISTIPSGSTYLQNPMYGCLDDSSGLLQNTGENDPTTRTFVKVYKSGSVGRSLDITRFSNYAELREELGQMFGIKGQLDDPDRSGWQLVFVDRENDVLLLGDDPWESFVNSVWYIKILSPEDVHKMGKQGNDPRYLS*
>Seita.3G028100.1
MASSQEKATSGVLRNAAALLDEMQLMGETQGAKKVINSELWHACAGPLVCLPQRGSLVYYFPQGHSEQVAATTKKVPNSRIPNYPSLPSQLLCQVHNITLHADKETDEIYAQMTLQPVHSETEVFPIPSLGAYTKSKHPTEYFCKNLTASDTSTHGGFSVPRRAAEKLFPQLDYSMQPPNQELIVRDLHDNLWTFRHIYRGQPKRHLLTTGWSLFVGAKRLKAGDSVLFIRDEKSQLLVGVRRATRQQPALSSSVLSTDSMHIGVLAAAAHAASSGGSFTIYYNPRTSPSPFVIPLARYNKATYMQPSVGMRFATMFETEESSKRRCTGTVVGISDYDPMRWPNSKWRNLQVEWDEHGYGERPERVSLWDIETPENSLVFSSPLNSKRQCLPSYGVPGLQIGSVNMSSIPRAQGNPFGNLQHMPGIGSELALMLLNQSGQNLGSPLACQQSSFSSIIQNVNHGYIPPSTFGASTGSIKQESMLSNEAQQQLSAPNIQKDDQQGIDSTSAQELDVRARGPRNTDSYSSQSISDQNSKGEHRTKTRRSKKGLSHKSISDKSELSSVPSQICDDQRHGSEPKLVDCETEQVNCGNNEDSSGALTRGGFAGEPQVQQVEQHELLAPPKFEPSKSPDGGKSVSSFPNQGCSPQFFEGLDWVIQPSYYQDSNGIHSVSASENIFNQSADITSTINADTMEAFQNSCLSECFPNSVQEFISSPDLNSLTFMSPDMQHLDGQHDVNNLPSTSNSYVQMSYSEESGNQSASLSGLHMEAIHINSSCSEPMTTGSFDAGMFSKLPNLRDSQVLPLQEIHNSSMGTPSCSMDAASVKPIKPPVRTYTKVQKLGSVGRSIDVTRFRDYHELRSAIACMFGLQGKLEHPGSSDWKLVYVDYENDVLLVGDDPWEEFINCVRCIRILSPSEVQQMSENGVHVLNDCIQIAQ*
>Seita.3G147000.1
EVARRLRGGSEDGSGGDGEDGDTVKQRFSRMPHMFCKTLTASDTSTHGGFSVPRRAAEDCFPPLDYSQQRPSQELVAKDLHGTEWRFRHIYRGQPRRHLLTTGWSAFVNKKKLVSGDAVLFLRGDDGELRLGVRRAAQLKNGSAFPALYNQCSNLGSLANVAHAVATKSVFHIYYNPRLSQSEFIIPYSKFMKSFSQPFSAGLRFKMRYESDDATERRYTGIIAGISEADPMWRGSKWKCLMVRWDDDVDFRRPNRISPWEIELTSSVSGSHLSAPNAKRLKPCLPHVNPDYLVPNGSGRPDFAESAQFHKVLQGQELLGYRTHDNAAVATSQPCEARNMQYIDERSCSNDASNSIPGVPRLGVRTPLGSPGFSYHCSGFGESQRFQKVLQGQEVFRPYRGSLVDACLRNNAFHPQDGSHAPSAVNKWHTQLHGCAFRGPQAPMLPSQSSSPPSVLMFQRGNSKISRFEFGHGSLDKNEDDRPAMFGHDGGIGGTEQSLMLQPHHDSGEVRNRHVTVEKFHSTVAARKDGPDNREVNTNSCKIFGISLTEKVPANKEKDSGDVNYPSPFLSLKQQVPKSLGNSCATVHEQRPVVGRVIDVSTMDMMI*
>Seita.3G179300.1
MGIDLNAVEEDELAGPAVCGELWHACAGAGVALPRRGGAVVYLPQAHLAAAGDGGEVPASAAARVPPHVACRVVDVELCADAATDEVYARLALVAEGKMFGRNNHDRETEVNCEMEDGDGGKKLRTSHMFCKTLTASDTSTHGGFSVPRRAAEDCFPPLDYEQLRPSQELIAKDLHGMKWRFRHIYRGQPRRHLLTTGWSSFINKKKLVSGDAVLFLRGNDGELRLGVRRAVPLKNELLLEAVNSTDSKLRTLSAVASSLENRSIFHICFNPRTGASEFIVSYGKFLKGLNYPFSTGMRFKVGFENEDANQRSHGLISGISEVDPIRWPGSKWRCLLVKWDDDTKCNHRNRVSPWDIEGISSSISMTNCLSSVSKRTKLCFPQGDLDAPILDGNGRPDSMETECFHRVLQGQELVRTRTHGVAWSHSSDTPKCQGSCERRFSADVWNCKMNDAMSGFRHRNANGFAYQPLGFSESVRFSEVLQGQEMSQAVPSFLGAALDARVQNGRIGSFDYVHRSTVSQGYPLQQFNLPATEVHSPSSVLMVNQTTALQPELEGMTNREEANGSRYAPIAVRREAERWPSTQQPRASGNGSEVFNTTEASAPATAAKPVDRGVGRSSCRLFGFSLTDKILGAEEDGVKEGNYEADHQTPRALDLFGHSQSAPSALHALCAAPLGI*
>Seita.3G321500.1
MAAAAGGGGGGWGGPEAGGGGGGEKDALFVELWKACAGPVSSIPPLGEKVYYFPQGHIEQVEASTNQLAEQQGTPLYNLPWKIPCKLMNIELKAEPDTDEVYAQLTLLPDKKRDENTTTTVESDAAEDEVVPVAPPATNEQLLIHSFCKTLTASDTSTHGGFSVLRRHADECLPPLDMSQHPPNQELVAKDLHGVEWRFRHIFRGQPRRHLLQSGWSVFVSAKRLVAGDAFIFLRGENGELRVGVRRALRHQTTIPSSVISSHSMHLGVLATAWHAVNTGSMFTIYYKPRTSPAEFVVSRDRYYESLKQNYTIGMRFKMRFEGEEAAEQKFTGTIVGIGASDPSGWADSKWRSLKVRWDEASAVLRPERVSPWQIEPAAVSPSPVNPLPLRFKRSRSNVNASPSDMPTVTREVASKVMADSQQNSLPRALHSQGRAQLTSRFRDSSDLKSAQDLTMWSSGIEQERNNIAAQTKLSLEGWTQTRRPEGYNQLSSAFQPLKDAQNPLCSFPSQISGNHSNTWDTVDAHYPTQQANHNMLPGTWSLMPHNSGFMMNQQNYLSMPEAALPQRAEIAKFSGKSAFTSLQGHGIDRCCSGWIGHNRASSSLINPRPLVIETDVQKTKGTSFKLFGFPLGSPEKSEPLVSPPSVAYDGKLQTSPSQRNQLDIIEVDDYSDPSKTVKPLDGPQTDSVRENNHPCPEATQNVQNKVQSSSTRSCKKVHKQGSALGRSIDLTKFTCYSELIAELDQMFDFGGELSSPHKNWMVVFTDNEGDMMLVGDDPWNEFCSMVHKMFIYTREEVERMNPGALSSRSEETLSDSLVRGSGSKEPRGGPSALSLNSENC*
>Seita.3G394000.1
MNLSPSKMPEPSPESDGEQRCLNSELWHACAGPLVSLPMVGSRVVYFPQGHSEQVAASTNKEVDAQIPNYPNLPPQLICQLHNVTMHADAETEEVYAQMTLQPLSPEEQKEPFLPIELGAGSKQPTNYFCKTLTASDTSTHGGFSVPRRAAEKVFPPLDFSQQPPVQELIARDLHDNEWKFRHIFRGQPKRHLLTTGWSVFVSAKRLVAGDSIIFIWNDNNQLLLGIRRANRPQTVMPSSVLSSDSMHIGLLAAAAHAAATNSRFTIFYNPRASPSEFVIPLAKYVKAVYHTRVSVGMRFRMLFETEESSVRRYMGTITGISDLDSERWPNSHWRSVKVGWDESTAGDKQPRVSLWEIEPLTTFPMYPTAFPLRLKRPWASGLPMFNGGRSDEFARYSSLMWLRDGNRGAQSLNFQGFGVSPWLQPRIDYPLLGLKPDTYQQMAAAALEEIRGGDHLKQTSSLLPVQQAQNLNGGLDPLYGNPVLQQMQFQSQQPPLQAVQQGYGQNTGNSGFLQSQLQQLQLQKQQESAPQQQQQTQQVLQQQSHQDMQQHLSSNCHDITNVASSMSEAGSASQSQSSLLPVSSFYQQNMFEGNSSPGLHLQNSFQNFSSQEASNLLNLPRSGQLMASEGWPSKRLAVEPLANLEAQSVQHKLEKVSHQSNVSHISGTLAPLSARDGSSAQALGTNVQSHLLSSSFAIHDGMTTVRSGGVGSGTDAITIASLRYSDVNLLPENSLATSSCLGESGTFNSLDDVCGVNPSQGGTFVKVYKSGSLGRSLDITRFSSYYELRSELERLFGLEGQLEDPVRSGWQLVFVDRENDILLVGDDPWQEFVNSVWCIKILSPQDVQQMVRGGDDLLSTPGATMLQSSVACDDYSAGHSMQNLTGSIAPVVPLDY*
>Seita.4G040100.1
MKDPGSGGVTPSPAEGDKKPINSELWHACAGPLVSLPPVGSLVVYFPQGHSEQVAASMHKELDTIPSYPSLPSKLICKLLSLTLHADSETDEVYAQMTLQPVNKYDRDAMLASELGLKQNKQPTEFFCKTLTASDTSTHGGFSVPRRAAEKIFPPLDFTMQPPAQELIAKDLHDISWKFRHIYRGQPKRHLLTTGWSVFVSTKRLLAGDSVLFIRDEKSQLLLGIRHASRPQPALSSSVLSSDSMHIGILAAAAHAAANSSPFTIFYNPRASPSEFVIPLAKYNKALYTQVSLGMRFRMLFETEDSGVRRYMGTITGIGDLDPIRWKNSHWRNLQVGWDESTASERRTRVSIWEIEPVATPFYICPPPFFRPKLPKQPGMPDDENEVESAFKRAMPWLGDDFALKDVQNALFPGLSLVQWMAMQQNPQMLTAAAPAVQSQYLTSNALGMQDGIGGVNEDPAKRLSMQAQNIGLPNLQAGSKVDHPAITSLAQQQQQQHPILQQQQVQPLQQNSAILQQQQAQLLQQNAIHLQQQQEQLQRQHSQPPQQLKATASLQPMDQHKLKEQQPSGGQAVSQAQLLNQILQPSSSQIQQLGLPKSPTQRPGLPGLTTMGSLPQPQLTQTPQLQQTAEYQQALLQSQQPQLQQLSQSELQLQLLQKIQQQNLLSQLNPQHQSQLIQQLSQKSQEILQQQVLQHQLGGADTMGQLKHLQQTPLNHMTGSMTPQQLVRSHSALAESEEPSSSTAPSGSRVSPINSLSRAQQGSRNLPEIPSTPHIEHLLQEIQSKSDNRIKNDIQGSKETVHAPNRHPASDQLDASSATSFCLDESPREGFSFPPVCLDSTAQVDPRDNFLIAENVDTLMPDALLSRGMSSGKGICNLPTGQRDHRDVENELSSAAFSSQSFGVPDMSFKPGCSSDVAVADGGMASQGLWNSQTQRMRTFTKVQKRGSVGRSIDITRYRGYEDLRHDLACMFGIQGQLEDPYRTDWKLVYVDHENDILLVGDDPWEEFVSCVKSIKILSSAEVQQMSLDGDLGCIPPQGQACSASDDANAWRG*
>Seita.4G240600.1
MIKQQQQPASSVGPQAAAVAAAAASGCEGEKKPPAINSELWHACAGPLVSLPPAGSLVVYFPQGHSEQVAASMQKDVDGHVPSYPNLPSKLICLLHNVTLHADPETDEVYAQMTLQPVTSYGKEALQLSELALKQPRPQTEFFCKTLTASDTSTHGGFSVPRRAAEKIFPPLDFSMQPPAQEIQARDLHDATWTFRHIYRGQPKRHLLTTGWSLFVSGKRLFAGDSVIFVRDEKQQLLLGIRRANRQPTNISSSVLSSDSMHIGILAAAAHAAANNSPFTIFYNPRASPTEFVVPFAKYQKALYGNQISLGMRFRMMFETEELGTRRYMGTITGISDLDPVRWKNSQWRNLQVGWDESAAGERRNRVSIWEIEPVAAPFFICPPPFFGSKRPRQLDDESSEMENLLKRAMPWLGEEICIKDPQTQNTIMPGLSLVQWMNMNMQQNSSFANTAMQSEYLRSLSNPNMQNLGAADLSRQLCLQNQILQQNSIQFSSSKLPQQMQPVNELSKATLPLNQLGMGTKLQEQIHDPSNLQRQQQSMNQLLPLSQSQTNLVQAQVLVQNQMQQQQQPPSMTQNQQPAASQPQLLPHPQQQQQQQQQQQQQQQQKLLHQQQQLLLQQQQLQQQQQNQQQLNKMAAQVPNLAAQQLQLSDQQLQLQLLQKLQQQQQSLLSQPAVTLAQLPLIQEQQKLILDMQQQLSNSQSLSQQQTMPQQSTKVPSQATPPPPPSMQQEPQQKVPQKHVGFTDTSHAAIPPTTSVNAISAAGSSMMANGAAHSVLTEEIPSCSTSPSTANGNHLAQPILGRNQQCGMINNEKLPQSTAPMSIPSSLEAVTGIPRSTKELPKLNSNVKQSVMASKLPNTGPIPQNLVNSAPPTDYLETASSATSVWLSQADGLLHQGFPMSNFNQQQIFKDAPPETDIQGTDPSNNALFGINNDGQLGFPMGADAFLSNGIDASKYQNHISTDIDGNYRIPKDGQQEISSSMVSQSFGASDMAFNSIDSGMNDGGFLNRTSWPPAAPLKRMRTFTKVYKRGAVGRSIDISHYSGYDELKHALARMFSIEGQLEEQQRIGWKLVYKDHEDDILLLGDDPWEEFVNCVRCIRILSPQEVQQMSLDGDLGNNILPNQACSSSDGGNAWRARCDQNSGNPSTGSYDQFE*
>Seita.4G257800.1
MITFVDSAAMERERESDKCMDPQLWHACAGGMVQMPAVHSKVYYFPQGHAEHAQGPVELPAGQVPALVLCRVAAVRFMADPDTDEVFAKIRLAPVRPNESGYAADAEDAIGAAAGGQEDKPASFAKTLTQSDANNGGGFSVPRYCAETIFPRLDYSADPPVQTVLAKDVHGVVWKFRHIYRGTPRRHLLTTGWSTFVNQKKLVAGDSIVFMRTENGDLCVGIRRAKKGGIGGPEFLHQPPPPGGNYGGFSMFLRGDEDGNKMMATRGKVRVRVRPEEVVEASKLAVSGQPFEVVYYPRASTPEFCVKAGAVRAAMRTQWCAGMRFKMAFETEDSSRISWFMGTVSAVQVADPIRWPNSPWRLLQVAWDEPDLLQNVKRVSPWLVELVSNMPAIHLSPFSPPRKKLCVPLYPELPLEGQFPTPMFHGSPLGRGVGPMCYFPDGTPAGIQGARHAQFGISLSDLHLNKLQSSLSPHGLHHLDHGMQPRIAAGLIIGHPAARDDISCLLTIGTPQNKKSDVKKAPPQLMLFGKPILTEQQISLGTGGGFPLSTPKRSPSDDNAEKTVSNSDISSPGSNQDGTSSGGAPSCQDNKVLDLGLETGHCKVFMQSEDVGRTLDLSDVGSYEELYQRLADMFGIEKAELMSHVFYRDASGALKHTGDKPFSEFTKTTRRLTILTDTASSDSLAR*
>Seita.4G262300.1
MRLSSSSGSVLPAQAGSPEAVEEHKCLNSELWHACAGPLVSLPAVGSRVVYFPQGHSEQVAASTNKEMESQIPNYPNLPPQLICQLHNVTMHADAETDEVYAQMTLQPLNPQELKDPYLPAELGSANKQPTNYFCKTLTASDTSTHGGFSVPRRAAEKVFPPLDFTQQPPCQELIAKDLHGNEWKFRHIFRGQPKRHLLTTGWSVFVSAKRLVAGDSVLFIWNDNNQLLLGIRRASRPQTVMPSSVLSSDSMHIGLLAAAAHAASTNSRFTIFYNPRASPSEFVIPLAKYVKAVYHTRISVGMRFRMLFETEESSVRRYMGTITGISDLDSVRWPNSHWRSVKVGWDESTAGERQPRVSLWEIEPLTTFPMYPSPFPLRLKRPWPTGLPSLHGGKDDDLTNSLMWLRDTANPGFQSLNFGGLGVNPWMQPRLDASLLGLQPDMYQAMATAAFQDPTKQVSPTILQFQQPQNIAGRAAPLLSSQILQQVQPQFQQQPYLQNISESTIHGQGQAELLKQQIQRSHSFNEQKPQLQPQQQQQESQQQSQCLQVPQHQQMQQQNNMTNYQSVSNALSAFSQLSSAPQSSPVALQTILPFSQAQSFAETNMSSLSPSNATAMQNTLRPFSAEAASQLSMPRPTAVPVADPWSSKRVAVESLLPSRPQVTSQMEQLNSAPPSIPQSSALAPLPGRGCLDQDVNSDPQNHLLFGVSIDSQSLLMQGGIPGLQNGNDSTAIPYSTSNFLSPSQNDFSLDHTLNSSGCLDDAGYVPCSDNSDQVNRLPATFVKVYKSGTYGRSLDITRFSSYHELRRELGRLFGLEGQLEDPMRSGWQLVFVDREEDVLLVGDDPWQEFVSTVSCIKILSPQEVQQMGKQGLELLSSAAPARRLGSSCDDYVSRQESRSLSTGIASVGSVEF*
>Seita.5G004300.1
MAQGREPELFAELWRACAGPLVELPQTDERVFYFLQGHLEQLQEPTDPALLAEQIKMFQVPNKILCKVVNVELKAETETDEMFAQITLQPDPDQVNLPTLPDPPLPETPRPVVHSFCKILTPSDTSTHGGFSVLRRHANECLPPLDMSMPTPTQELITKDLHGSEWRFKHIYRGQPRRHLLTTGWSTFVTSKKLIAGDAFVYLRSETGQQRVGVRRLVQKQSAMPASVISSQSMHLGVLASASHAIKTNSIFLVYYRPRLSQSQYIVSLNKYLEASKIGFNVGMRFKMSFEGEDVPVKKFSGTVVDKGDLSPQWQGSEWKTLKVQWDEATNLNGPERVSSWEIEPFDASTPTINIPVQQSTKNKRPRETAESLDIQAMEPTQEFWLSGMPEQHEKAGIGSSEPNCISGHQVVWTSERAGYSAMSSSVCQNSVVLGNWFKDFNSSSKGASPSLSEISQKLFQVTSNDARVPPWPGLSAYQAEEPSSKLSSNTALCSYQTEEVAPNFSNAVEEKKEPGMFRLFGVNLINHTRNAAASEKMTVGVREISTRTAGSLEDSGQLSALSKVTKDHTQNVNESPREIQSHQNCTGRTRIKVQMQGNAVGRAIDLVNLHGYPQLISELDEMFEIKDLSSKEKWKVAFTNDEGDTMEVGDVPWLKFCQTVRKIVIHPIEDESDMDPFLEQDVKTDF*
>Seita.5G265200.1
MEPSGAASCGRPAGERAAMAGIDLNTVEEEDEEAETPLGLREGGTVCLDLWHACAGPVAPLPRKGSAVVYLPQGHLEHIGGDAAPAAVPPHVFCRVVDVNLHADDATDEVCARVSLLPEDEEAERRARARAREDEDAARYGEGGGAMRPLARTPHMFCKTLTASDTSTHGGFSVPRRAAEDCFPPLDYSLQRPSQELVAKDLHGTEWKFRHIYRGQPRRHLLTTGWSAFVNKKKLVSGDAVLFLRGEDGVLRLGVRRAAQLKNVNLIPAPHNQCSNHRNLGNVTEAVATRTVFHIYYNPRLSQSEFIIPYWKFMRSFNQPFSVGMRCRMRYESDDASERRCTGIIIGSREAEPMWHGSKWKSLVVRWDDDIECRRSQYGSPWDIELTGSVSGSQAHLSCFHVGSFTNGSVSSDFAGSARFHKVLQGQEFLGFKTHDVTAISASHATEARNLQDSDERSSYINMSNNIFGVPRFGVRSPAGIPRFPYHCSGFGESQRFQKVLQGQEVFRPFRGGALADVHIRTVGMYQPDGTHASSAAYKWPTPQGCDIRHPTKPVLLQASSPSSVLMFPQTSSKIPHLEYEYSCLDEDEDGRRDRAVPTQDMGRSNQALSLWPHLVSGEAIDECTVTEKMHSPVSGAEHESNNESTVENGCKIFGISLAEQVRSCDEADSCNANCNSRLQPSQSQMQSLGTCWATVSAS*
>Seita.5G321300.1
MGIDLNMVDVGGEDRRPPLGVCRELWHACAGPVVSLPRRGSLVVYLPQGHLAAAGGGDVTADLPPHVVCRVADVELCADAATDEVYARLALVAEGEAFGRNVRGAGVEGDDDMEDLDAERKSRMLHMFCKTLTASDTSTHGGFSVPRRAAEDCFPPLDYNQLRPSQELVAKDLHGAKWKFRHIYRGQPRRHLLTTGWSSFVHKKKLVSGDAVLFLRGDDGELRLGVRRAIQLKNEALFEDFSSDSAKRHTLSDVYDSLEHRSVFHISYNPRATASEYIIPYRKFIKSLNRPVCIGARINFQCHNEDVSERRSGMVVGISEVDSVKWPGSKWRSLLVRWEDGSECNGQDRVSPWEIEIVGGSVSVAHSLSASSSKRTKLCPQGNLDVPTMYVAGNGCTDSVETGKLPRVLQGQELMGFRTHRVTCAPQTAEVAKFQSSDASRFLTNARSCMLSGPTSRLAVQNTSFTYQSVGFNESIGFSEVLQGQEISQAVPMFQGMMSEACSVKGGYGLRGYMRTPTTVDGLSATAQECSLTLSTPPAAQVHSPHPNHMFNQTVASQLGLASKTAGEVGNSSQPRPFEMLWEAQTRSQHGRPGQISLDQFETRRASAPGDAAKTGSGGREVRKTSCRLFGFSLTEKILPADDDSVKEVSYEAECQNPRMLDLFGYNRSTPNAALPALCAAPFGM*
>Seita.5G438100.1
MPPAIMAPPPTPQAPSNSGDPLYPELWRACAGPLVTVPRPGDLVFYFPQGHIEQVEASMNQVAGNQMRLYDLPSKLLCRVLNVELKAETDTDEVYAQIMLMPEPEQNEVAAEKASSGSAATPRPAVRSFCKTLTASDTSTHGGFSVLRRHADECLPPLDMTQSPPTQELVAKDLHGMEWRFRHIFRGQPRRHLLQSGWSVFVSSKRLVAGDAFIFLRGENGELRVGVRRAMRQLSNIPSSVISSQSMHLGVLATAWHAINTKSMFTVYYKPRTSPSEFIIPYDQYMESLKNNYSIGMRFRMRFEGEEAPEQRFTGTIVGCENLDPLWPDSSWRYLKVRWDEPSTIPRPERVSPWKIEPASSPPVNPLPVSSRVKRPRQNAPQPSPESSVLTKEGASKVDIGSAQTQHQNSVLQGQEQMTLRNNMNESTDSDATVQKPMMWSPSPNGKTHTSFQQRPSMDNWMPLGRRETDFKDNRSAFKDARTSSQSFGDTQGFFMQTFDDNQHRLSFNNQFQDQGSAHRFADPYFFMPQQPSLTVESSTRTQTANNELRFWSDQNTVYGNTTDQQGFRYGQNPSNWLNQPFPLVEQPRVVRPHASVAPFDLEKTREGSGFKIFGFKVDTASASPIQLSSPMSAMREHVVQTQPSASVNELQPVQTECLPEGSVSTAGTSTENEKSIQQATQSSKDIQSKSQGASTRSCTKVHKQGVALGRSVDLSKFSDYDELKAELDKMFEFEGELVSANKNWQIVYTDNEGDMMLVGDDPWEEFCSIVRKIYIYTKEEVQKMNSKSSAPRKEEPPAAGEVCAATNE*
>Seita.6G212000.1
MAAPGTSSGGAGGEGGGGGTKVNQELWYACAGPLVALPPAGSLVVYFPQGHSEQVAASMGKDADAKIPSYPNLPSKLICILNSVTMHADTDTDEVYARMTLQPVSNVTQCDKETLLASELALKQTRPQTEFFCKTLTASDTSTHGGFSVPRRAAERIFPHLDFSMQPPAQELQARDLHDSIWTFRHIYRGQPKRHLLTTGWSLFVSGKKLLAGDSVLFIRDARQQLLLGIRRANRQPVNLSSSVLSSDSMHIGILAAAAHAAANNSQFTVFYNPRASPSEFVIPFAKYQKAVYSNQLSLGMRFRMMFETEESGTRRYMGTITGISDLDPVRWKNSQWRNIQVAWDEAAPSERRTRVSLWDIEPVIAPFFIYPSPLFTAKRPRQPGITDDETADMENLFKRTMPWFGEEIYKKDLNTQNNLVPGLSLVQWMQQNPSLTSTVVQPELLNSLAGKPVQTLAAADMSRQISFQPQFLQQNNIQFNTSLLPPQNQQTEQLAKVIATPNQSGSVIVSQKVVQDCNPEQKQHAITQPVQGSQPMISAAQPQFVVQNQLQQPQVILQAQAQQPQVILQAQIQQQQPLVQNHTVLHGDLQQAQLLQQQEPHLQQQPQQVQQSVQEQQQIKIQPVQVLNGTNVITQLSDHQMKIQLLKALQPQQPLIMEQQKMILDLQHQMVNSNSQSAAQQCAQVTTQAGGMHSSNTIQYPTQQKTQPHQPIQDFPRHAVSVANPEIATSMGTRSLHVPGGVQLLKTEDVPSSSTSPPTNNNPVLLQSVPCSSKNQSILTAAKTPQSSAVVGPTLGQGMKPYESAQQMVMIPKGAEQKPVTRQDYVNNTPQMDYLDTSSSATSVCLSQADGSLHQNFPPSSFNQHQLLRETVPDSEFEVTDPGNNFLFGVNIDGHLDSLNADALLANNFETEKYMDHMPGHGISNYISSKDSQQELSSSMISHSFGVADIAFNSIDSSINDAPFLNRNSRPPAPAHQRIRTYTKVHKRGAVGRSIDINRYSGYDELKHDVARMFGIEGQLSDQNRGGWKLVYEDHEKDVLLVGDDPWEDFVNCVRCIRILSPQEEMQMRLASDFGDSFLHNQACSSSDGGHPWRVTGD*
>Seita.7G108100.1
MAAAMDVANPGAAASSGMSSDALYRELWHACAGPLVTVPRQGERVYYFPQGHMEQLEASTHQQLDQYLPMFNLPSKILCSVVNVELRAEADSDEVYAQIMLQPEADQSELTSPDPELQEPEKCTAHSFCKTLTASDTSTHGGFSVLRRHAEECLPQLDMSQNPPCQELVAKDLHGTEWHFRHIFRGQPKRHLLTTGWSVFVSSKRLVAGDAFIFMRGENGELRVGVRRLMRQVNNMPSSVISSHSMHLGVLATASHAISTGTLFSVFYKPRTSRSDFIVSVNKYLEAKKQKISVGMRFKMRFEGDEAPERRFSGTIVDIGSLPAMSKSLWADSDWRSLKVQWDEPSSILRPDRISPWEVEPLDAANPQSPQPPLRNKRARPLASPSMVAELPSGFGLWKSPTDSARTLSFSEPQRARELFPSIPPSAFSSSSNVSFNSKNEPSMLSSQFYWSARDTRADSCAASTNTVIVEKKQEPSSGGCRLFGIDICSAEEEVLPVVTAPGLGYDQTAASVELNSDKLSQLSDVNNSDAQAASSEPSPLESQSRQVRSCTKVIMQGMAVGRAVDLTKLSGYSDLCHKLEEMFDIQGELGSTLKKWRVIYTDDEDDMMLVGDDPWNEFCSMVKRIYICTYEEAKKLTSKSKLPGNSDTSKLSDVNSPSEWVI*
>Seita.7G169600.1
MSAAACAPTRLGMLTFAERMPPPPPPPPPQPQPEQLEEEVMIDGGAAAEGGVSPQLWLASAGSMCTVPPVGAAVYYFPQGHAEQASAAVDLPAAAVPPFVPCRVAAVRFMAEPHTDEVYARIRLVPLRSGEPVVDVGDAAAAGGDQQPQQPNQASFAKTLTQSDANNGGGFSVPRFCAETIFPELDYRARPPVQSVYARDVHGVEWSFRHIYRGTPRRHLLTTGWSNFVNKKRLLAGDSVVFVREANGRIHVGLRRAKRGFGAGAGGDDGFAGWGDAFGALQVRGNAGGGARYPGGKVPPEDVVAAARLAAAGQPFEVVHYPRASTPEFCVRAAAVRASMQVPWCPGMRFKMAFETEDSSRISWFMGTIAGVKAADPTRWPQSPWRLLQVGDILHEREIFFLNRWQIGNHRGGWLALPFSQVAWDEPELLQNVKRVCPWLVEQVSSMPNLHLPSFTPRKKPRIPEFPLEGQPLFDPGFPPAAHPLPPLAPHPRPHHDQNPHPHALVPLFPFPDGSAAAGIQGARHAQFAPFFSDLHVGNLQQGLLFCGFRPADHHTTPPAPRISTDLAIGIPPPPRQDAPRSPPSAASKKADDDVKPARIMLFGRAILTEEQMNCNSPTSPGATGEGAPKPDRDAEKGPNTPDGSGSGVTEGSPTKNNLWEPGQCKVFVKSDSVGRNLDLSALGTFDELYARLAAMFRFDNADLRSHVLYRTATGEEKHVGDEPFSAFVKSVRRITIRSDAGSDSTGSQ*
>Seita.8G135700.1
MYTELWNLCAGPLVTVPSVGDKVYYFPQGHIEQVEASTNQVAEQHMQLYNLPWKILCEVMNVELKAEPDTDEVYAQLTLLPESKQPDENGSSEQEMPAAPSAAPARPRVHSFCKTLTASDTSTHGGFSVLRRHADECLPPLDMSRQPPTQELVAKDLHGAEWRFRHIFRGQPRRHLLQSGWSVFVSAKRLVAGDAFIFLRGVNGELRVGVRRAMRQQANVPSSVISSHSMHLGVLATAWHAVNTGTMFTVYYKPRTSPAEFVVPCDRYMESLKRNYPIGMRFKMRFEGEEAPEQRFTGTIVGNVDPDQAGWPESKWRYLKVRWDEASSIPRPERVSPWQIEPAVSPPPINPLPVHRPKRPRSNAVASLPDSSAPTKEAAPKVTVEAQQNALQRVLQTQDNATPKSAFGDKSELDAAQQSVLRPSGFDREKSTIGTQRKLGSDSWMQMSRPESYNEMLSGLSGYQQPKDLQNQQGFCSLPDQIAAGRPNFWHTVNAHYQDQQGNHNMFGSWSMMPSSTGFGLNRQNYPMIQEVGAMPQSSANTKFGNGVYTPLPGRGIDQYSAGWFGHMVPGSRMDDAQPRVIKPQPLVLAHGDAQKMKGNSCKLFGIHLDSPAKSEPLKSPPSVANDGMPQTPAAAEWRRVDTTEVEKSSDPPKTPKQLDAPQADPVPCPQSSRSTQCKSQGGSTRSCKKVHKQGIALGRSVDLTKFKGYTELVSELDEMFDFNGELKGSNKEWMVVYTDNEGDMMLVGDDPWDEFCNMVHKIFIYTTEEVQRMNPGTLNSGSEDSPANSMERGSAVRETLPASSLNSGNC*
>Seita.9G219800.1
MKEAGDERCLDPQLWHACAGGMVQMPPARSRVYYFPQGHAEHAHGGGAAELAAAAGPRGLPPLVLCCVAGVRFLADPETDEVFAKIRLVPVAPSGEADLRDPDELGGDPADAREKLSSFAKTLTQSDANNGGGFSVPRYCAETIFPKLDYRADPPVQTVLAKDVHGEVWKFRHIYRGTPRRHLLTTGWSTFVNQKKLVAGDSIVFLRTEHGELCVGIRRAKRVSCGGMECMSGWNAPGYGAFSAFLKDEESKMMKGPGGYMRGMGKVKIADVVEAASLASRGQPFEVVYYPRASTPEFVVKAASVQNAMRNHWCPGMRFKMAFETEDSSRISWFMGTIASVQVADPIRWSNSPWRLLQVTWDEPDLLQNVKCVNPWLVELVSSIPPIHLGPFSPPRKKLRMPQHPDFPFDGQLLNPVFHGNPLGPSNSPICCFPDNAPAGIQGARHAQFGLPLTDHQLNKLHLGLFQGSGFNRLDAITPQSRISKGFVITSAPVKESVSCLLTIGTPQGTEKSDDRKKPHIMLFGKPILTEQQMNSGGSRETFSPEVTGNGSSDGNAQKTGNVSDGSGSSICIGFSSQGREASELGLEAGHCKVFMESEDVGRTIDLSVFGSYEELYGQLADMFGIEKAEIMSHLHYRDAAGAVKHTGEEPFSDFMKVARRLTITERGEGRLQKPLIEYMVERA*
>LOC_Os01g13520.1
MSSQGAGGGVGDPELFAELWRACAGPLVEVPQRDERVFYFLQGHLEQLQEPTDPALLAEQIKMFQVPYKILCKVVNVELKAETETDEVFAQITLQPDPDQENLPTLPDPPLPEQPRPVVHSFCKILTPSDTSTHGGFSVLRRHANECLPPLDMSMATPTQELITKDLHGSEWRFKHIYRGQPRRHLLTTGWSTFVTSKKLISGDAFVYLRSETGEQRVGVRRLVQKQSTMPASVISSQSMHLGVLASASHAIKTNSIFLVYYRPRLSQSQYIVSVNKYLAASKVGFNVGMRFKMSFEGEDVPVKKFSGTIVGEGDLSLQWSGSEWKSLKVQWDEVTNVNGPERVSPWEIETCDGTAPAINVPLQSATKNKRPREPSETIDLQSLEPAQEFWLSGMPQQHEKTGIGSSEPNCISGHQVVWPGEHPGYGAVSSSVCQNPLVLESWLKDFNSSNKGVSPTLSEISQKIFQVTSNEARIATWPARSAYQAEEPTSKLSSNTAACGYRTEEVAPNASKVVEGKKEPAMFRLFGVDLMKCTSISTTTDDKSSVGAGEASAKGTGSHEDSGQLSAFSKVTKEHIAADESPQEIQSHQNYTARTRIKVQMHGNAVGRAVDLANLDGYEQLMNELEEMFNIKDLKQKWKVAFTDDEGDTMEVGDDPWLEFCQMVRKIVLYPIEDEKKIEPHPKLLSSANPEQDQKTGF*
>LOC_Os01g48060.1
MVGIDLNTVEEEEDEEEGGATGTVTAPAEARAGGAVCLELWHACAGPVAPLPRKGSAVVYLPQGHLEHLGAAPGSGPGAAVPPHVFCRVVDVSLHADAATDEVYAQVSLVADNEEVERRMREGEDGAACDGEGEDAVKRPARIPHMFCKTLTASDTSTHGGFSVPRRAAEDCFPPLDYSLQRPFQELVAKDLHGTEWRFRHIYRGQPRRHLLTTGWSGFINKKKLVSGDAVLFLRGEDGELRLGVRRAAQLKNASPFPALHNQISNTSSLSEVAHAVAVKSIFHIYYNPSCTHRLSQSEFIIPYWKFMRSFSQPFSVGMRFKLRYESEDASERRRTGIIIGSREADPMWHGSKWKCLVVKWDDDVECRRPNGVSPWEIELSGSVSGSHLSTPHSKRLKSCFPQVNPDIVLPNGSVSSDFAESARFHKVLQGQELLGLKTRDGTVNTASQATEARNFQYTDERSCSINMSNNILGVPRLGVKTPSGNPGFSYHCSGFGESQRFQEVLQGQEVFRPYRGGTLSDACIRGSGFRQPDGNHAPGAAFKWLAPQGCDHHGITTSVLPQASSPSSVLMFPQTSSKMPGLEYIYGCLDRNENSRHFKIGPTQDMTRTDQTLRLWPHLISGKVLDECTRNEKLHSPVSGAEHESNNKCLNTNGCKIFGISLTEKAQAGDEVDCGNASYHSRLQSLKPQMPKSLGSSCATVHEQRPVVGRVVDISAVNTMI*
>LOC_Os01g54990.1
MASSASSSSSPSSRPPLMALPSFYRPPWPSERGGEQRATDCWAGSPAAGGGRARATAMGIDLNNTASGGEEDAPAPGPVCRDLWHACAGPVVSLPRRGSAVVYLPQGHLSAAGAGGGIRGEVAVALPPHVACRVVDVELCADAATDEVYARLALRAEGEVFERNLHGGGIEREDDMEDGDEERKSRMLHMFCKTLTASDTSTHGGFSVPRRAAEDCFPPLDHKQLRPSQELVAKDLHGAKWRFRHIYRGQPRRHLLTTGWSSFVNKKKLVSGDAVLFLRGDDGELRLGVRRATQLKNEAIFKAFSSESSKMRTLSAVADSLKHGSVFHICYNPRATASEYVVPYWKFVKSFNHPVCIGMRFKFHFESEDVNERRSGMIAGVSEVDPIRWPGSKWRSLLVRWEDATDCNSQNRVSPWEIEIVGGSISVAHSLSASSSKRTKLCPQGNLDVPALYGNGRPDSVETEKFPRVLQGQELMGSRTHRATCSPQSIDITKSKSFDAWRFLTDTRSCMLGSSTSRLPVQYSGYTHQSVSFGESIGFPEVLQGQEISQTVPPFQGMLPDACSAKSRYELKNYVCTPATMNGLSSANEGYCLSLSTVPPSPPSSLMLYQTGVPQLELASKNNDKSGNDSQPALRQHKLLSETSWDQFKIGKASTPGNATKPGNGGREVDRTSCRLFGFSLTEKIIPTDKDGEKEVSYETDCQNPRMLDLFGYNCSTPGALHALCAAPLGI*
>LOC_Os01g70270.1
MPPAAMAPPPPPQGSSTGDPLYDELWHACAGPLVTVPRVGDLVFYFPQGHIEQVEASMNQVADSQMRLYDLPSKLLCRVLNVELKAEQDTDEVYAQVMLMPEPEQNEMAVEKTTPTSGPVQARPPVRSFCKTLTASDTSTHGGFSVLRRHADECLPPLDMTQSPPTQELVAKDLHSMDWRFRHIFRGQPRRHLLQSGWSVFVSSKRLVAGDAFIFLRGENGELRVGVRRAMRQLSNVPSSVISSQSMHLGVLATAWHAINTKSMFTVYYKPRTSPSEFIIPYDQYMESVKNNYSVGMRFRMRFEGEEAPEQRFTGTIIGSENLDPVWPESSWRSLKVRWDEPSTIPRPDRVSPWKIEPASSPPVNPLPLSRVKRPRPNAPPASPESPILTKEAATKVDTDPAQAQRSQNSTVLQGQEQMTLRSNLTESNDSDVTAHKPMMWSPSPNAAKAHPLTFQQRPPMDNWMQLGRRETDFKDVRSGSQSFGDSPGFFMQNFDEAPNRLTSFKNQFQDQGSARHFSDPYYYVSPQPSLTVESSTQMHTDSKELHFWNGQSTVYGNSRDRPQNFRFEQNSSSWLNQSFARPEQPRVIRPHASIAPVELEKTEGSGFKIFGFKVDTTNAPNNHLSSPMAATHEPMLQTPSSLNQLQPVQTDCIPEVSVSTAGTATENEKSGQQAQQSSKDVQSKTQVASTRSCTKVHKQGVALGRSVDLSKFSNYDELKAELDKMFEFDGELVSSNKNWQIVYTDNEGDMMLVGDDPWEEFCSIVRKIYIYTKEEVQKMNSKSNAPRKDDSSENEKGHLPMPNKSDN*
>LOC_Os02g04810.1
MKQQQTPASSAVTAAAAASSSATAAVAACEGERKAAAINSELWHACAGPLVSLPPVGSLVVYFPQGHSEQVAASMQKDVDAHVPSYPNLPSKLICLLHGVNLHADPDTDEVYAQMTLQPVNTYGKEALQISELALKQARPQMEFFCKTLTASDTSTHGGFSVPRRAAEKIFPPLDFSMQPPAQELQARDIHDNVWTFRHIYRGQPKRHLLTTGWSLFVSGKRLFAGDSVIVVRDEKHQLLLGIRRANRQPTNISSSVLSSDSMHIGVLAAAAHAAANSSPFTIFYNPRASPTEFVIPFAKYQKALYSNQISLGMRFRMMFETEELGTRRYMGTITGISDLDPVRWKNSQWRNLQVGWDESAAGERRNRVSIWEIEPVAAPFFLCPQPFFGVKRPRQLDDESEMENLFKRAMPWLGEEVCIKDTQNQNSTAPGLSLVQWMNMNRQQSSSLANTAAQSEYLQALGNPAMQNLAADELARQLYVQNNLLQQNCIQFNSPKLPQQMQTMNDLSKAAIPLNQLGAIINPQDQKQDAVNHQRQQNSIQVIPLSQAQSNLVQAQVIVQNQMQQQKPSPTQNPQRINGQRLLLSHQQKDQNLQLQQQLLLQQKQQLQQQQQQQQQNQQQLNKSLGQLVNLASQQSKLFDEELQLQILQKLQQQSLMSQSTSTLSQPPLIQEQQKLITDMQKQLSNSHSLAQQQMMPQQEIKPSLQATPLLPTVQQEQQQKLLQKQVSLADVSGVAFQPISSTNVIPKTGGAMIISGATQSVVTEEMPSCSTSPSTANGNHFTQSTKNRHCINTERLPPSTAPMLIPTSIDAVTATPLMTKELPKPNNNVKQSVVNSKLPNVAPGPQNCINHALQTDNLETSSSATSLCPSRTDGLVHQGFPSSNFNQHQMFKDALPDVEMEGVDPSNSGLFGINNDNLLGFPIETEDLLINALDSVKYQNHISTDVENNYPMQKDALQEISTSMVSQSFGQSDMAFNSIDSAINDGAFLNKNSWPAAPLLQRMRTFTKVYKRGAVGRSIDIGRYSGYEELKHALARMFGIEGQLEDRQRIGWKLVYKDHEDDILLLGDDPWEEFVNCVRCIRILSPQEVQQMSLDGDLGSNVLPNQACSSSDGVNGWRPRCDQNPGNPSIGPYDQFE*
>LOC_Os02g06910.1
MKLSPSAGGVSDQPPSPPEVAEEQKCLNSELWHACAGPLVSLPAVGSRVVYFPQGHSEQVAASTNKEMESQIPNYPNLPPQLICQLHNVTMHADAETDEVYAQMTLQPLSPQELKDPFLPAELGTASKQPTNYFCKTLTASDTSTHGGFSVPRRAAEKVFPPLDFTQQPPAQELMAKDLHGNEWKFRHIFRGQPKRHLLTTGWSVFVSAKRLVAGDSVLFIWNDSNQLLLGIRRANRPQTVMPSSVLSSDSMHIGLLAAAAHAASTNSRFTIFYNPRASPSEFVIPLAKYVKAVYHTRISVGMRFRMLFETEESSVRRYMGTITGISDLDPVRWMNSHWRSVKVGWDESTAGERQPRVSLWEIEPLTTFPMYPSPFPLRLKRPWPTGLPSLYGGKEDDLASSLMWLRDSQNTGFQSLNFGGLGMSPWMQPRLDSSLLGLQPDMYQTIAAAAALQNTTKQVSPAMLQFQQPQNIVGRSSLLSSQILQQAQPQFQQMYHQNINGNSIQGHSQPEYLQQPLQHCQSFNEQKPQLQPQQQQQESHQQQPQHQQMQQQKHLSNFQTVPNALSVFSQLSSTPQSTPSTLQTVSPFSQQHNFPDTNISCLSPSNVSSMHDTLRSFPSEAASDLPGVPRITPVPVSDPWSSKRVAVESTITSRPHDISSQIENFDLTPSSIPQNSTLAPLPGRECLVDQDGSSDPQNHFLFGVNIDSQSLLMQDGIPSLHNENSSSTIPYSTSNFLSPSQDDYPLSQTLTTPGCLDESGYVPCSDNADQVKRPHATFVKVYKSGTVGRLLDITRFSSYHELRSEVGRLFGLEGQLEDPLRSGWQLVFVDREDDVLLVGDDPWQEFVNSVSCIKILSPQEVQQMGKPGIELFSTSARRLGNSCDNYMSRQESRSLSTGIASVGSVEF*
>LOC_Os02g35140.1
MAGSVVAAAAAAGGGTGSSCDALYRELWHACAGPLVTVPRQGELVYYFPQGHMEQLEASTDQQLDQHLPLFNLPSKILCKVVNVELRAETDSDEVYAQIMLQPEADQNELTSPKPEPHEPEKCNVHSFCKTLTASDTSTHGGFSVLRRHAEECLPPLDMTQNPPWQELVARDLHGNEWHFRHIFRGQPRRHLLTTGWSVFVSSKRLVAGDAFIFLRGENGELRVGVRRLMRQLNNMPSSVISSHSMHLGVLATASHAISTGTLFSVFYKPRTSQSEFVVSANKYLEAKNSKISVGMRFKMRFEGDEAPERRFSGTIIGVGSMSTSPWANSDWRSLKVQWDEPSVVPRPDRVSPWELEPLAVSNSQPSPQPPARNKRARPPASNSIAPELPPVFGLWKSSAESTQGFSFSGLQRTQELYPSSPNPIFSTSLNVGFSTKNEPSALSNKHFYWPMRETRANSYSASISKVPSEKKQEPSSAGCRLFGIEISSAVEATSPLAAVSGVGQDQPAASVDAESDQLSQPSHANKSDAPAASSEPSPHETQSRQVRSCTKVIMQGMAVGRAVDLTRLHGYDDLRCKLEEMFDIQGELSASLKKWKVVYTDDEDDMMLVGDDPWPEFCSMVKRIYIYTYEEAKQLTPKSKLPIIGDAIKPNPNKQSPESDMPHSDLDSTAPVTDKDC*
>LOC_Os02g41800.1
MITFADLAEPAPGAERCVDRQLWLACAGGMCTVPPVGAAVYYFPQGHAEHALGLAAPELSAARVPALVPCRVASVRYMADPDTDEVFARIRLVPLRAAEDGDVEEDGAAAGEEHEKPASFAKTLTQSDANNGGGFSVPRYCAETIFPRLDYAADPPVQTVVAKDVHGVAWNFRHIYRGTPRRHLLTTGWSTFVNQKKLVAGDSIVFLRGDGGDLHVGIRRAKRGFCGGGGGAEEASLPGWDQYGGLMRGNASPCAAAKGRGKVRAEDLVEAARLANGGQPFEVVYYPRASTPEFCVRAAAVRAAMRVQWCPGMRFKMAFETEDSSRISWFMGTVASVQVADPIRWPQSPWRLLQVTWDEPDLLQNVKRVSPWLVELVSSMPAINLSSFSPPRKKPRILAYPEFPFEGQLLNPAFPPNPLAHGHHHYHHNHPSFFPFPDVSAPAGIQGARHAQFGPSLSDLHLTHLQSSLMYPGLRRPDHVGPTSIPPPRISTDLTMGSSPPARALSMGAKKPDDAKPPGLMLFGQRILTERQMSLSGTTSPAATGNSSLNWNTEKGASEGSGSGVIQNSPTDNTSSERLQWFRENSTVSELGLEPGQCKVFIESDTVGRNLDLSSLASFEQLYGRLSEMFCIDSAELRSRVLYRGATGEVRHAGDEPFSEFIKLARRLTILTDAGSDNLGS*
>LOC_Os04g36054.1
MAAAMEMAANPGGSGTCSDALFRELWHACAGPLVTVPKRGERVYYFPQGHMEQLEASTNQQLDQYLPMFNLPSKILCSVVNVELRAEADSDEVYAQIMLQPEADQSELTSLDPELQDLEKCTAHSFCKTLTASDTSTHGGFSVLRRHAEECLPQLDMSQNPPCQELVAKDLHGTEWHFRHIFRGQPRRHLLTTGWSVFVSSKRLVAGDAFIFLRGESGELRVGVRRLMRQVNNMPSSVISSHSMHLGVLATASHAISTGTLFSVFYKPRTSRSEFVVSVNKYLEAKKQNLSVGMRFKMRFEGDEAPERRFSGTIIGIGSVPAMSKSPWADSDWKSLKVQWDEPSAIVRPDRVSPWELEPLDASNPQPPQPPLRNKRARPPASPSVVAELPPSFGLWKPPSEAAQTLSFSEPQRAREIFPSIPASIFSASSHVEFNSKNEPSILSNQFYWSMRDSKTDSFSASTNKTRVERKQEPTTMGCRLFGIEISSAVEEALPAATVSGVGYDQTVLSVDVDSDQISQPSNGNKSDAPGTSSERSPLESQSRQVRSCTKVIMQGMAVGRAVDLTKLNGYGDLRSKLEEMFDIQGDLCPTLKRWQVVYTDDEDDMMLVGDDPWDEFCSMVKRIYIYSYEEAKLLAPKSKLPVIGDTIKLSSMNSSHESVDLDNHASVTNRDC*
>LOC_Os04g43910.1
MELAGPTEGDGGGSVDSQLWAACAGSMSSVPPVGAAVYYFPQGHAEQASAAVDLSSARVPPLVPCRVVAVRFMADAESDEVFAKIRLVPLRPGDAVVDVGEAAAAEARREEENSRPRPTSFAKTLTQSDANNGGGFSVPRFCAETIFPELDYSSEPPVQSVCAKDVHGVEWTFRHIYRGTPRRHLLTTGWSPFVNKKQLTAGDSIVFMRDEGGNIHVGLRRAKRGFCSIGGDDESLSSIPGWDQYRGLMRRNATATATGGRTPPKGKVPPENVLTAATRATTGQPFEVLYYPRASTPEFCVRAAAVRTAMAVQWCPGMRFKMAFETEDSSRISWFMGTVAGVQASDPVRWPQSPWRLLQVTWDEPELLQNVKRVCPWLVELVSSMPNLHLPSFSPPRKKPRNPPYAELPLEGQIFTGPVFPPNPMAHDHHHHHGFPFLPFPDSSAQPAGIQGARHAQFASPFPEFHIGNLQPNLMLYAGIRLPPADRAAPAPRPPRIIISTDLTIGSPGKPDDAACSPSSGGKKIDDTKPRGFLLFGQAILTEEQIKNGNSDGRPASPNWDAEKAPNTSEGSDSGVTQGSPTKNTTPSWSLPYFGGNNISRASEYELNPGQCKVFVESETVGRSLDLSALSSFEELYACLSDMFSIGSDELRSHLVYRSPAGEVKHAGDEPFCAFVKSARKLRILTDAGSDNLGD*
>LOC_Os04g56850.1
MASSQEKAKTGVLRNAAALLDEMQLMGETQGAKKVINSELWHACAGPLVCLPQRGSLVYYFPQGHSEQVAATTRKIPNSRIPNYPNLPSQLLCQVHNITLHADKDTDEVYAQMTLQPVNSETDVFPIPTLGAYTKSKHPTEYFCKNLTASDTSTHGGFSVPRRAAEKLFPQLDYSMQPPNQELIVRDLHDNMWTFRHIYRGQPKRHLLTTGWSLFVGAKRLKAGDSVLFIRDEKSQLLLGVRRATRQQTMLSSSVLSTDSMHIGVLAAAAHAASSGSSFTIYYNPRTSPSPFVIPVARYNKATYMQPSVGMRFAMMFETEESSKRRYTGTVVGISDYDPMRWPNSKWRNLQVEWDEHGYGERPERVSIWDIETPENTLVFPSSTLNSKRQCLPGYGVSVPGMEIGSANMSSFPRAQGNPYGSLQHIPAVGSELAIMLLNQSGQTLGSPLSFHQSSYSSIIQNVKQNYIPPLTVSTSACLTKQESLPSDDAQHQFHMANMQNGDLEGSEVQPVIDSISESKLNATSRDPRNTDSYTSRSTSEQNSKGEPRGKTRRSKKGLPHKTVSEKSDLSSAPSWICDNQQVGLESKLVGCDEQVNCGNIEDSSGALTQGNFVGQPHGHQVEQKGVLSPPKVESSKSPDGGKSVNSFPNQGCFSQFIDGLDWMTQPSYYQDSNVIQPAGVSENIFSSSADIPPSMIADTMETFQASCLSDCLPNSIQEFISSPDLNSLTFLSPDMQNLEVQLQHDGSNLPSTSNSFVQMSFSEESASQSANLSGLHMESTHRSINTTSCSQPMSTGGFDAGMYSKLPRLKESQILSLPEIHTNSMGTSACSMDATEYSLDRSAKPMKPPVRTYTKVQKQGSVGRSIDVTGFRNYHELRSAIACMFGLQGKLEHPGSSEWKLVYVDYENDVLLVGDDPWEEFINCVRCIRILSPSEVQQMSENGMHVLNDCIQAA*
>LOC_Os04g57610.1
MSSSSAASIGPPQPPPPPAPPEEGGWLEKKCLNSELWHACAGPLVCLPTVGTRVVYFPQGHSEQVAASTNKEVEGHIPNYPNLPAQLICQLHDVTMHADVETDEVYAQMTLQPLNPQEQNDAYLPAEMGIMSKQPTNYFCKTLTASDTSTHGGFSVPRRAAERVFPPLDFTQQPPAQELIARDIHDIEWKFRHIFRGQPKRHLLTTGWSVFVSAKRLVAGDSVLFIWNEKNQLLLGIRRASRPQTVMPSSVLSSDSMHIGLLAAAAHAAATNSRFTIFYNPRASPSEFVIPLSKYIKAVFHTRISVGMRFRMLFETEESSVRRYMGTITEVSDADPVRWPSSYWRSVKVGWDESTAGERPPRVSLWEIEPLTTFPMYPSLFPLRVKHPWYSGVASLHDDSNALMWLRGVAGEGGFQSLNFQSPGIGSWGQQRLHPSLLSSDHDQYQAVVAAAAASQSGGYLKQQFLHLQQPMQSPQEHCNLNPLLQQQILQQASQQQIINPDAQNIQTMLSPSAIQQQLQQLQQMQQVQNDQKQKIQPDQSYQVPTSAVLPSPTSLPSHLREKFGFSDPNANSSSFITSSSSDNMLDSSFLQGSSKAVDLSRFNQPVASEQQQQQQQAWKQKFMGSQSVSFGGSVLHNSPTSKDGSVENKIGRDVQNQSLFSPQVDSSSLLYNMVPNLTSNVSDGNLSTIPSGSTYLQNAMYGCLDDSSGLLQNTGENDPATRTFVKVYKSGSVGRSLDITRFSNYAELREELGQMFGIKGQLDDPDRSGWQLVFVDRENDVLLLGDDPWESFVNSVWYIKILSPEDVHKMGKQGNDPRYLS*
>LOC_Os04g59430.1
MARPPAATAPPPPPPPPPPPPPPIDRLVWLACAAPLSRIPVVGTQVSYFPEGHAEQCPAPLPDPLPSAHRFFLCTITAVDLSADTTTGEPYATISLLPLRHDAPAPAPAPAPAAAELAEAESQEFRYYAKQLTQSDANNGGGFSVPRLCADHIFPALNLDDDPPVQSLTMGDLQGDSWEFRHIYRGTPRRHLLTTGWSKFVNAKQLVAGDTVVFMWCGAPAPERKLLVGVRRAARYSGESACNARGRVQPQEVMEAVRLAAEQAAFRVTYYPRHGAGEFVVPRVEVDKGLTTPWRCGMQVRAQVMEAEDTRRLAWLNGTLTNLRHQQIWRTLEVEWDASAASSSMKNRFVNPWQVQPVDFPPLPMGLKISNNNISAPVCNGDSLLVPPILMHPQPQPPADIQGARHNNGHAYADIPSSSTPSMVRTQQLFPRDLQILVPHTDIVTPQNGSPPDNPVNTPLSASDGMKTIQLFGVTITSPVQGDTNGAFASAQVNQVPEGVDDETATEEASDTSLPDSLTNGHNQDGARL*
>LOC_Os05g43920.1
MGIDLNTVEEEAEEGAAAAVCGELWHACAGPGVALPRRGSALVYLPQAHLAADGGGGEVPPAGAAAVPPHVACRVVGVELRADAATDEVYARLALVAEGEMLQRNFREGGGEDGAGEMEGCDAEKKPRMPHMFCKTLTASDTSTHGGFSVPRRAAEDCFPPLVIHLKEKLVTFNDYKTVRPSQELIAVDLHGTQWKFRHIYRGQPRRHLLTIGWSSFVNRKKLVSGDAVLFLRGDDGQLRLGVRRAVQLRNEALFEPVNSSDSKLRILSSVASSLENKSVFHICFNPRSGASEFIVPYWRLLKSLNHPFSIGMRFRVCYESEDANERSAGLISGISEVDPIRWPGSRWKCLLVRWDDSTDSSHQNRVSPWEIERVGGSVSVTHSLSSGSKRTKLHFPQGSLDTPFLNGNGHPDSMGTENFHRVLQGQEFRGSRSHGVVCSESPGVPNFQSPDNRRFSADMRGYMMPASGPPQRNTEFTYQPIGFSESLGFPEVLQGQEMSQVVPLFRGATFGARTQNDRVVSANSVHRSAAQSGLLASTLGHPISQFTLSSSKVSSPSSVLMFNQATAPNHETVSGTNNKGMHVSQFASQEMLSETVTWPGTQRQTPSEITSNQFALARIPAPPSGAESGLPKRDAGRSSCRLFGFSLTGNMLGEDGEGLDDGAIEAGCENPPVLELFGHSHSTPGALHALCAAAPLGM*
>LOC_Os05g48870.1
MTGIDLNTVEEDEEEAAEEVAANGSSPAPARAGAVCLELWHACAGPVAPLPRKGGVVVYLPQGHLEHLGDAPAAAAAAAAVPPHVFCRVVDVTLLADAATDEVYAQLSLVPEKEEVARRADDGEGEDGDGMKQRFARMPHMFCKTLTASDTSTHGGFSVPRRAAEDCFPPLDYSQQRPSQELVAKDLHSTEWRFRHIYRGQPRRHLLTTGWSAFVNKKKLVSGDAVLFLRGDDGELRLGVRRAAQLKNGSAFPALYNQCSNLGTLANVAHAVATESVFNIYYNPRLSQSEFIVPYWKFMKSLSQPFSVGLRFKMRYESEDATERRYTGIITGSGDTDPMWHGSKWKCLLVRWDDDAEFRRPNRVSPWEIELTSSVSGSHLSTPHSKRLKPCLPHVNPEYMVPRGGGCPDFAESAQFHKVLQGQELLGFKSHGGTAAATSQPCEARHLQYIDERSCSSDASNSILGVPRLGDRAPLGNPGFSYHCSGFGESHRLQKVLQGQELFRPYRGTLVDASMGSNGFHQQDSPRAPGVVNKWQAQLHGRAAFHGPPALALPSQSSSPPSVLMFQQANSKMPRLEFGHGQLDKHENDRRVRFGPSEGIERREQRIPLQPYPTSGEVIDGQVTVEKSHSPGRHGKDGPDNKAVGTNSCKIFGISLTEKVPAREELDDGDANYSLQSLKQVPKSLGNSCATVHEQRPVVGRVIDISTMDMMI*
>LOC_Os06g09660.1
MKDQGSSGVSPAPGEGEKKAINSELWHACAGPLVSLPPVGSLVVYFPQGHSEQVAASMHKELDNIPGYPSLPSKLICKLLSLTLHADSETDEVYAQMTLQPVNKYDRDAMLASELGLKQNKQPAEFFCKTLTASDTSTHGGFSVPRRAAEKIFPPLDFTMQPPAQELIAKDLHDISWKFRHIYRGQPKRHLLTTGWSVFVSTKRLLAGDSVLFIRDEKSQLLLGIRRATRPQPALSSSVLSSDSMHIGILAAAAHAAANSSPFTIFYNPRASPSEFVIPLAKYNKALYTQVSLGMRFRMLFETEDSGVRRYMGTITGIGDLDPVRWKNSHWRNLQVGWDESTASERRTRVSIWEIEPVATPFYICPPPFFRPKLPKQPGMPDDENEVESAFKRAMPWLADDFALKDVQSALFPGLSLVQWMAMQQNPQMLTAASQTVQSPYLNSNALAMQDVMGSSNEDPTKRLNTQAQNMVLPNLQVGSKVDHPVMSQHQQQPHQLSQQQQVQPSQQSSVVLQQHQAQLLQQNAIHLQQQQEHLQRQQSQPAQQLKAASSLHSVEQHKLKEQTSGGQVASQAQMLNQIFPPSSSQLQQLGLPKSPTHRQGLTGLPIAGSLQQPTLTQTSQVQQAAEYQQALLQSQQQQQQLQLQQLSQPEVQLQLLQKIQQQNMLSQLNPQHQSQLIQQLSQKSQEILQQQILQHQFGGSDSIGQLKQSPSQQAPLNHMTGSLTPQQLVRSHSALAESGDPSSSTAPSTSRISPINSLSRANQGSRNLTDMVATPQIDNLLQEIQSKPDNRIKNDIQSKETVPIHNRHPVSDQLDASSATSFCLDESPREGFSFPPVCLDNNVQVDPRDNFLIAENVDALMPDALLSRGMASGKGMCTLTSGQRDHRDVENELSSAAFSSQSFGVPDMSFKPGCSSDVAVTDAGMPSQGLWNNQTQRMRTFTKVQKRGSVGRSIDITRYRDYDELRHDLACMFGIQGQLEDPYRMDWKLVYVDHENDILLVGDDPWEEFVGCVKSIKILSAAEVQQMSLDGDLGGVPPQTQACSASDDANAWRG*
>LOC_Os06g46410.1
MRLSSSSGSVLPAQAASPEAVEEQKCLNSELWHACAGPLVSLPAVGSRVVYFPQGHSEQVAASTNKEMESQIPNYPNLPPQLICQLHNVTMHADAETDEVYAQMTLQPLSPQELKDPYLPAELGSANKQPTNYFCKTLTASDTSTHGGFSVPRRAAEKVFPPLDFTQQPPAQELIAKDLHGNEWKFRHIFRGQPKRHLLTTGWSVFVSAKRLVAGDSVLFIWNDNNQLLLGIRRANRPQTVMPSSVLSSDSMHIGLLAAAAHAASTNSRFTIFYNPRASPSEFVIPLSKYVKAVYHTRISVGMRFRMLFETEESSVRRYMGTITGISDLDAARWPNSHWRSVKVGWDESTAGERQPRVSLWEIEPLTTFPMYPSPFPLRLKRPWPTGLPSLHGGKDDDLTSSLMWLRDSANPGFQSLNFGGLGMNPWMQPRFDASLLGLQPDMYQTIAATAFQDPTKQVSPTILQFQQPQNIGGRANTLLPSQILQQVQPQFQQQQYLQNINETTIQGHAQSEFLQQQLQRCQSFTEQKPQLQTQQQQQESQQQQQQQSQCMQVPQHQQMQQQKNMTNYQSVPNALSPFSQLSSPSQSSPMTLQTVLPFSQPQSYPDTSMSSLSPSNTSTMHNALRPFSSEAPSHLSMPRPTAVPVPDPWSSKRVAVESLLPSRPQVTSQMEQLDSTAPSIPQSSALAPLPGRGCLVDQDGNSDPQNHLLFGVNIDSQSLLMQGGIPSLQGENDSTAIPYSTSNFLSPSQNDFPLDQTLSSADCLDESGYVPCSQNSDQVINRPPATFVKVYKSGTYGRSLDITRFSSYHELRRELGRLFGLEGQLENPLRSGWQLVFVDREDDVLLVGDDPWQEFVNSVSCIKILSPQEVQQMGKPFELLSSAPGKRLGSSCDDYVSRQESRSLSTGIASVGSVEF*
>LOC_Os06g47150.1
MITFVDSAAKERERESDKCLDPQLWHACAGGMVQMPPVSSKVYYFPQGHAEHAQGHGPVEFPGGRVPALVLCRVAGVRFMADPDTDEVFAKIRLVPVRANEQGYAGDADDGIGAAAAAAAQEEKPASFAKTLTQSDANNGGGFSVPRYCAETIFPRLDYSADPPVQTVLAKDVHGVVWKFRHIYRGTPRRHLLTTGWSTFVNQKKLVAGDSIVFMRTENGDLCVGIRRAKKGGVGGPEFLPPPPPPPPTPAAGGNYGGFSMFLRGDDDGNKMAAAARGKVRARVRPEEVVEAANLAVSGQPFEVVYYPRASTPEFCVKAGAVRAAMRTQWFAGMRFKMAFETEDSSRISWFMGTVSAVQVADPIRWPNSPWRLLQVSWDEPDLLQNVKRVSPWLVELVSNMPAIHLAPFSPPRKKLCVPLYPELPIDGQFPTPMFHGNPLARGVGPMCYFPDGTPAGIQGARHAQFGISLSDLHLNKLQSSLSPHGLHQLDHGMQPRIAAGLIIGHPAARDDISCLLTIGSPQNNKKSDGKKAPAQLMLFGKPILTEQQISLGDAASVDVKKSSSDGNAENTVNKSNSDVSSPRSNQNGTTDNLSCGGVPLCQDNKVLDVGLETGHCKVFMQSEDVGRTLDLSVVGSYEELYRRLADMFGIEKAELMSHVFYRDAAGALKHTGDEPFSEFTKTARRLNILTDTSGDNLAR*
>LOC_Os06g48950.1
MMKQAQQQPPPPPASSAATTTTAMAAAAAAAVVGSGCEGEKTKAPAINSELWHACAGPLVSLPPAGSLVVYFPQGHSEQADPETDEVYAQMTLQPVTSYGKEALQLSELALKQARPQTEFFCKTLTASDTSTHGGFSVPRRAAEKIFPPLDFSMQPPAQELQARDLHDNVWTFRHIYRGQPKRHLLTTGWSLFVSGKRLFAGDSVIFVRDEKQQLLLGIRRANRQPTNISSSVLSSDSMHIGILAAAAHAAANNSPFTIFYNPRASPTEFVIPFAKYQKAVYGNQISLGMRFRMMFETEELGTRRYMGTITGISDLDPVRWKNSQWRNLQVGWDESAAGERRNRVSIWEIEPVAAPFFICPPPFFGAKRPRQLDDESSEMENLLKRAMPWLGEEICIKDPQTQNTIMPGLSLVQWMNMNMQQSSSFANTAMQSEYLRSLSNPNMQNLGAADLSRQLCLQNQLLQQNNIQFNTPKLSQQMQPVNELAKAGIPLNQLGVSTKPQEQIHDASNLQRQQPSMNHMLPLSQAQTNLGQAQVLVQNQMQQQHASSTQGQQPATSQPLLLPQQQQQQQQQQQQQQQQQQQQKLLQQQQQQLLLQQQQQLSKMPAQLSSLANQQFQLTDQQLQLQLLQKLQQQQQSLLSQPAVTLAQLPLIQEQQKLLLDMQQQLSNSQTLSQQQMMPQQSTKVPSQNTPLPLPVQQEPQQKLLQKQAMLADTSEAAVPPTTSVNVISTTGSPLMTTGATHSVLTEEIPSCSTSPSTANGNHLLQPILGRNKHCSMINTEKVPQSAAPMSVPSSLEAVTATPRMMKDSPKLNHNVKQSVVASKLANAGTGSQNYVNNPPPTDYLETASSATSVWLSQNDGLLHQNFPMSNFNQPQMFKDAPPDAEIHAANTSNNALFGINGDGPLGFPIGLGTDDFLSNGIDAAKYENHISTEIDNSYRIPKDAQQEISSSMVSQSFGASDMAFNSIDSTINDGGFLNRSSWPPAAPLKRMRTFTKVYKRGAVGRSIDMSQFSGYDELKHALARMFSIEGQLEERQRIGWKLVYKDHEDDILLLGDDPWEEFVGCVKCIRILSPQEVQQMSLEGCDLGNNIPPNQACSSSDGGNAWRARCDQNSEAILKISMMKSKVEDVRYWNTA*
>LOC_Os07g08520.1
MAQPPDAAAAAAVPPPVVIDRDVWHACAVPYSGVLPGVGTLVYYIPHGHIEQCAEDPALLLSRLPDPIHPVPCTVADLVLDVDAESGEAYATISLLPGSHDDTTARRQVPAHGEPGFRFFEKQLSPADVTSNALVLPAGAEHVLPPLDIAAYQTARLFDVRDLRGKRFEFVHIWDKKRCRYMLGDLGVNDNDGWRGFVKAKRLATRDTVVFMRRGGGDGDGDGELLVGVRRAPRARGGHHPRPGVEDNKVVSEVWLAMQGVTPFEVTYYPREGTFEFVVSRDEYIGFSFSPFYPFVPGTTVHLRMNPLQIAQSISGTVRTFDHLRPWRMLEVDWDQAASPISYRIHRQVNSWQVLRQPQPAATTSAVRIRDAIVATPQVQIMALPRPPPPTTTTGMVPSDDSYAMISLFPGDCYVTHRPLPAARDPVGGQREFCFFDKKLSPSDAAANGGGSGALFVIPKPSAAEHVLPRIPDLRVTNLQGGRWEFGHTWSDADTDRRSSSHTLAAGWSAFVKAKRLCVGDTVIFMRRRPGGEPLVGVRRKPHGGMPVGIPDKHVADAWLDASSAQPFRVTYCPWQGTAEFVVRREEVEGSPPLAPGTRVRLLMNPDDARRRSQPPVYGTVRDVHCRSEWRMLEVDWDRDSPLAPTMNRRVNSWQVQPVQLALPPQGSDEEAAAATTSTAHAGDATTSAPSLALQLQTMASSSSSSAPIIPSRGSAFRIVNPRDGSQG*
>LOC_Os07g08540.1
MAAAAAALADDGDGIVDRAMWLACAAPNSGRLPAVGSMVFYFVDGHAEQFCQFPAPLLEQLAVPGPRVFLCTVAAVRLRADALTNEAYADITLDPVADHDVPRLLPAPAPAAAAGGQQQQLRYFVKTLMSSDAEYRDRFAVPMDVAKDVFPPLVDAKAVQPLIVKDLQGSPMTFDYGRNGNRVTLAKVWKKFRDDMDFVDGDSVIFMRRRDDDELYVGVRRQRTLDKPLRTRRSRPPTPLPVAVQEVIAAAGRAAAGEQFTATYRSRQDGDEFVVPREVVEEGLRLRSRFTPEMEVEFVWALEDGAPPSVGPHGKITAIHDTTWMWRSVEIGWTGGSEMNKYANFWQVRLVGSDDFASAAPPPPLSPKRLKSSEQCPSRPPEPLPGRVFLCKVTAVRLDATRNELFATMSLIPVARDQAIQPQAPADPGPSSPQVQTTLVSFVKPLTCTDAVKNRYRFIVPKRETAMGVLPQLQLNEHVPLYIKDMHGKEWVINYTWKEYTHMLSSGWIKFANANRLVTGDNVVFMRSMDSGERYMGLRRTLKPEPVSVDEVIEAVWRAARLEPFEVTYLSRQDGDEFVVPCGIVHNALRAKFTPGMVVNFVWAVEEDRLPNVGPQGKVIAIENYATSIWRMIQVEWPSCAGMNRYVNFWQIREVLGESSFEASTCIVRSQDYSPAPQRNLVNALQLPDGTKQLQQNKKSVSSSSTFRLFGKKMTPGVPPRRDTSGLSGQVSLFSHYLPHDEDDGQVPTMRQRLETLFPDNI*
>LOC_Os07g08600.1
MPLPSCRRREQRPRQSCFQNPECHLRLRARQQRPQESAVQSTLSSSIYFSDHFVLTPPPFQITPTSIQNSTWLPIPTSPAVAAPPLPRCLGGVDGEGAPCAPPPSPIPAGPASSTVSAASSAPATRDYLGGITGHRLGQEDDSGGHEYTSVSGIHVPSSSGVAFVSFGQCPQEVISTDLCLGLGPIAATAPLQPPPPPAAAAAAGSPSATTPEPGHGEATPTTSSSAQFQTQAQQVTRDMWMACAAPKSGRLPTVGSLVYYFPDGHAEQCLSRPQEPLPGRIFLCKVTDVRLGAAATNEALATISLVPIAADDHAFQLQAPADPDPAPAQSQSLVSFVKPLTYTDVTKNRFMVPKDDAAAGVLPHIQLNDDVPLRIKDLSGKEWAFNYTWKAHTRMFRNGWMEFSNANGLVTGDNAVFMRRGNGEMFMAVRRTRNRPAPFSVEEVIEAVWRAARREPFEVSYCLRQDGDEFVVPRDIVDDGLRARFAPGMAVNFVWAVEDGKLPTIGPQGEVISIENYATSIGA*
>LOC_Os08g40900.1
MASSGGGGGGGEEGEGRGATKVNQELWYACAGPLVSLPPQGSLIVYFPQGHSEQVAASMRKDADAQIPSYPNLPSKLICILHSVTMLADPDTDEVYARMTLQPVSNVTQCDKETLLASELALKQTRPQTEFFCKTLTASDTSTHGGFSVPRRAAERIFPRLDFSMQPPAQELQARDLHDNVWTFRHIYRGQPKRHLLTTGWSLFVSGKRLLAGDSVLFIRDAKQQLLLGIRRANRQPTNLSSSVLSSDSMHIGILAAAAHAAANNSQFTIYYNPRASTSEFVIPFAKYQKAVYGNQLSLGMRFRMMFETEESGTRRYMGTITGISDLDPVRWKTSHWRNIQVAWDEAAPTERRTRVSLWEIEPIIAPFFIYPSPLFTAKRPRLPGMTDDETEMDGLLKRAMPWVGEEICKKDLNIQNSVVPGLNLAQWMNMQHSSSLPGTVVQPELLNSLSGKPVQNLAAADLSRQISFHPQFLQQNNIQFNTALVPQQNQQTEQLAKVIPTPNQLGSVIIPQKVVQDCNSEQRQHVVTQPVQGSQPNINIPQPQLVVQAQLQQPQVILQAQLQQPQVVVQAQLQQTQPSVQSHTVLQGGLQQIQLLQQQQPHVQHQQIPQQLHHQQQQTQQLQPVQQVQQSVQEHQQIKIQPVHVSMDASMNTQVADHQMKLQLLKALQPQQPLISEQQKMLLDLQQQVINSQSAPQQCVQVTNQAISLHNSNTIQYPTQQKVQSHQVQDLTGNVIPNSKSDIATSMGASSLHVAGGRQLLKTDDVPSTSTSPSTNSNPVLLQSIPSSSKNQSLTTAGKTSQSSVVLGPTIEQDTKPYQNVKQTVMIPKTTEQRPATGQDCINNNPQMDYLDTSSSATSVCLSQADGSLQQNFPPSSFHQHHLLKDTVPDSEFEVTDPRNNLLFGVNIDGQLGLPLNADLLANDIGTDKYMDQLPGNGISNFISSKDSQQELSSSMISHSFGVADMAFNSIDSAINDTPFLNRNSRSAAGPAHQRMRTYTKVHKRGAVGRSIDINRYSGYDELKHDVARMFGIEGQLGDQNRVGWKLVYEDHEKDVLLVGDDPWEDFVKCVRCIRILSPQEEMQMRLVGDFGDSFLPNQACSSSDGGHPWRITGD*
>LOC_Os10g33940.1
MKEVGEVEEVRCLDPQLWHACAGGMVQMPAPRSRVYYFAQGHAEHADGGGGAAAAAAELGPRALPPLVLCRVEGVQFLADRDSDEVYAKIRLAPVAPGEAEFREPDELCPLGAAGDAAEPSPEKPTSFAKTLTQSDANNGGGFSVPRYCAETIFPKLDYRADPPVQTVLAKDVHGVVWKFRHIYRGTPRRHLLTTGWSTFVNQKKLVAGDSIVFLRTRHGELCVGIRRAKRMACGGMECMSGWNAPGYGGGGFSAFLKEEESKLMKGHGGGGYMKGKGKVRMADVVEAASLASSGQPFEVAYYPRASTPDFVVKAASVQAAMRIQWCSGMRFKMAFETEDSSRISWFMGTISSVQVADPNRWPNSPWRLLQVTWDEPDLLQNVKCVSPWLVELVSSIPPIHLGPFSSPRKKLRVPPHPDFPFEGHLLNPIFHGNPLGPSNSPLCCYPDTAPAGIQGARHAQFGLPLTDHQLNKLHLGLLHSGSFNRLDAITPPSRISKGFVVSSAPAHDNISCLLSISTPQVAEKSDDRKTTPHIMLFGKAIFTEQQITSSGSTETLSPGVTGNSSPNGNAHKTGNASDGSGSSICIGFSSQGHEASDLGLEAGHCKVFMESEDVGRTIDLSVFGSYEELYGRLADMFGIEKEEIINHLHFRDAAGVVKHPGEVPFSDFMKAARRLTIIAGDRERIERPLIECLVEQA*
>LOC_Os11g32110.1
MATAEVGGGGGEGDAAAAAVARAGGGGGGGGGGGEDALFTELWSACAGPLVTVPRVGEKVFYFPQGHIEQVEASTNQVGEQRMQLYNLPWKILCEVMNVELKAEPDTDEVYAQLTLLPESKQQEDNGSTEEEVPSAPAAGHVRPRVHSFCKTLTASDTSTHGGFSVLRRHADECLPPLDMSRQPPTQELVAKDLHGVEWRFRHIFRGQPRRHLLQSGWSVFVSAKRLVAGDAFIFLRGENGELRVGVRRAMRQQTNVPSSVISSHSMHLGVLATAWHAVNTGTMFTVYYKPRTSPAEFVVPYDRYMESLKQNYSIGMRFKMRFEGEEAPEQRFTGTIVGMGDSDPAGWPESKWRSLKVRWDEASSIPRPERVSPWQIEPAVSPPPVNPLPVPRTKRLRPNATALPADSSAIAKEAATKVVVESEPNGTQRTFQTQENATPKSGFGNSSELESAQKSIMRPSGFDREKNNTPIQWKLGSDGRMQMSKPESYSEMLSGFQPPKDVQIPQGFCSLPEQITAGHSNFWHTVNAQYQDQQSNHNMFPSSWSFMPPNTRLGLNKQNYSMIQEAGVLSQRPGNTKFGNGVYAALPGRGTEQYSGGWFGHMMPNSHMDDTQPRLIKPKPLVVAHGDVQKAKGASCKLFGIHLDSPAKSEPLKSPSSVVYDGTPQTPGATEWRRPDVTEVEKCSDPSKAMKPLDTPQPDSVPEKPSSQQASRNMSCKSQGVSTRSCKKVHKQGIALGRSVDLTKFNGYEELIAELDDMFDFNGELKGPKKEWMVVYTDNEGDMMLVGDDPWIEFCDMVHKIFIYTREEVQRMNPGTLNSRSEDSHANSMERGSVGREMRGCLSTSSLNSENC*
>LOC_Os12g29520.1
MAAAATAAASPVEGLTGGGGGGGGGVDGLFVELWRACAGPLVTVPAVGERVFYLPQGHIEQVEASTNQVAEQQGAPLYNLPWKIPCKVMNVELKAEPDTDEVYAQLTLLPEKQQDGNGSGNGNVSKDKVEEEEVVPPAATERPRVHSFCKTLTASDTSTHGGFSVLRRHADECLPPLDMSQHPPTQELVAKDLHGVEWRFRHIFRGQPRRHLLQSGWSVFVSAKRLVAGDAFIFLRGENGELRVGVRRAMRQQANIPSSVISSHSMHLGVLATAWHAVNTGTMFTVYYKPRTSPSEFVVPRDLYKESLKRNHSIGMRFKMTFEGEEAAEQRFTGTIVGVGDSDPSGWADSKWRSLKVRWDEAASVPRPDRVSPWQIEPANSPSPVNPLPAPRTKRARPNVLASSPDLSAVNKEVASKVMANSQQNGLPRAFHSQENMNLRSRFGDSNELNTSQKLTMWSSGSNQEKNNVSVQRELGSQSWMQMRRPDGSSEILSGFQPLKDTRNPLSSFPSQISGNRSNTWNTINVHYPDQNANHNMYPGTWSLMPPNTGFGVNQQNYLMTPDITLPQRSLNAKFGGNGAFTSLRAHGIDQRSSGWLGHIEPSSHIDDASSSLIKPQPLVIDHNVQKAKGSSCMLFGISLDSPAKPELLISPPSVAFDGKLQQDALEEDECSDPSKTVKPLDGAQHDSAREKHQSCPDGTKNIQSKQQNGSSRSCKKVHKQGIALGRSIDLTKFTCYDELIAELDQMFDFNGELNSSSKNWMVVYTDNEGDMMLVGDDPWNEFCNMVHKIFIYTREEVQKMNPGALNSRSEDSRSTSVERGLVGEGLQGGLSTPSLNSENC*
>LOC_Os12g41950.1
MKLSPPASADMPQALPENDGEQRCLNSELWHACAGPLVSLPVVRSRVVYFPQGHSEQVAASTNKEVDAQIPNYPNLPPQLICQLHNVTMHADAETDEVYAQMTLQPLSPEEQKEPFLPMELGAASKQPTNYFCKTLTASDTSTHGGFSVPRRAAEKVFPPLDFSQQPPAQELIARDLHDNEWKFRHIFRGQPKRHLLTTGWSVFVSAKRLVAGDSVIFIWNDNNQLLLGIRRANRQQTVMPSSVLSSDSMHIGLLAAAAHAAATNSRFTIFYNPRASPSEFVIPLAKYVKAVYHTRVSVGMRFRMLFETEESSVRRYMGTITSISDLDSVRWPNSHWRSVKVGWDESTTGDKQPRVSLWEIEPLTTFPMYPSAFPLRLKRPWASGLPMHGMFNGGGNDDFARYSSLMWLRDGNRGTQSLNFQGHGVSPWLQPRIDSPLLGLKPDTYQQMAAAALEEIRYGDPSKQHPATLQYQQTHNLNSGLNSLFASHVLGQVQFQPQQSPLQVVQQGHCQNTGDSGFLQGQLPRLQLHNTQQLLKEQELQQQQRQHVLQEQSSQEMQQQLPSSDHHVADVASESGSAPQAQSSLLSGSSFYNQNLLEGNSDPPLHLHNNFHNFSNQEASNLLILPRSSQLMASDGWPSKRLTLESAVHPEAPSMHPKIEKVNHQGISHFPGAFPPQSARGCSIVQDCRADAENRLLSSSFELQDGMTSIITDANRETDTMAIPLLRYSGADLTTENTLATSNCLGESGTFNPLNNISVNPSQGATFVKVYKSGSLGRSLDISRFSSYCELRSELERLFGLEGQLEDPVRSGWQLVFVDRENDILLVGDDPWQEFANSVWCIKILSPQEVQQLVRGGDGLLSSPGARMQQSNACDDYSASHNMQNIAGNIASVAPLDY*
>AT1G19220.1
MKAPSNGFLPSSNEGEKKPINSQLWHACAGPLVSLPPVGSLVVYFPQGHSEQVAASMQKQTDFIPNYPNLPSKLICLLHSVTLHADTETDEVYAQMTLQPVNKYDREALLASDMGLKLNRQPTEFFCKTLTASDTSTHGGFSVPRRAAEKIFPPLDFSMQPPAQEIVAKDLHDTTWTFRHIYRGQPKRHLLTTGWSVFVSTKRLFAGDSVLFVRDEKSQLMLGIRRANRQTPTLSSSVISSDSMHIGILAAAAHANANSSPFTIFFNPRASPSEFVVPLAKYNKALYAQVSLGMRFRMMFETEDCGVRRYMGTVTGISDLDPVRWKGSQWRNLQVGWDESTAGDRPSRVSIWEIEPVITPFYICPPPFFRPKYPRQPGMPDDELDMENAFKRAMPWMGEDFGMKDAQSSMFPGLSLVQWMSMQQNNPLSGSATPQLPSALSSFNLPNNFASNDPSKLLNFQSPNLSSANSQFNKPNTVNHISQQMQAQPAMVKSQQQQQQQQQQHQHQQQQLQQQQQLQMSQQQVQQQGIYNNGTIAVANQVSCQSPNQPTGFSQSQLQQQSMLPTGAKMTHQNINSMGNKGLSQMTSFAQEMQFQQQLEMHNSSQLLRNQQEQSSLHSLQQNLSQNPQQLQMQQQSSKPSPSQQLQLQLLQKLQQQQQQQSIPPVSSSLQPQLSALQQTQSHQLQQLLSSQNQQPLAHGNNSFPASTFMQPPQIQVSPQQQGQMSNKNLVAAGRSHSGHTDGEAPSCSTSPSANNTGHDNVSPTNFLSRNQQQGQAASVSASDSVFERASNPVQELYTKTESRISQGMMNMKSAGEHFRFKSAVTDQIDVSTAGTTYCPDVVGPVQQQQTFPLPSFGFDGDCQSHHPRNNLAFPGNLEAVTSDPLYSQKDFQNLVPNYGNTPRDIETELSSAAISSQSFGIPSIPFKPGCSNEVGGINDSGIMNGGGLWPNQTQRMRTYTKVQKRGSVGRSIDVTRYSGYDELRHDLARMFGIEGQLEDPLTSDWKLVYTDHENDILLVGDDPWEEFVNCVQNIKILSSVEVQQMSLDGDLAAIPTTNQACSETDSGNAWKVHYEDTSAAASFNR*
>AT1G19850.1
MMASLSCVEDKMKTSCLVNGGGTITTTTSQSTLLEEMKLLKDQSGTRKPVINSELWHACAGPLVCLPQVGSLVYYFSQGHSEQVAVSTRRSATTQVPNYPNLPSQLMCQVHNVTLHADKDSDEIYAQMSLQPVHSERDVFPVPDFGMLRGSKHPTEFFCKTLTASDTSTHGGFSVPRRAAEKLFPPLDYSAQPPTQELVVRDLHENTWTFRHIYRGQPKRHLLTTGWSLFVGSKRLRAGDSVLFIRDEKSQLMVGVRRANRQQTALPSSVLSADSMHIGVLAAAAHATANRTPFLIFYNPRACPAEFVIPLAKYRKAICGSQLSVGMRFGMMFETEDSGKRRYMGTIVGISDLDPLRWPGSKWRNLQVEWDEPGCNDKPTRVSPWDIETPESLFIFPSLTSGLKRQLHPSYFAGETEWGSLIKRPLIRVPDSANGIMPYASFPSMASEQLMKMMMRPHNNQNVPSFMSEMQQNIVMGNGGLLGDMKMQQPLMMNQKSEMVQPQNKLTVNPSASNTSGQEQNLSQSMSAPAKPENSTLSGCSSGRVQHGLEQSMEQASQVTTSTVCNEEKVNQLLQKPGASSPVQADQCLDITHQIYQPQSDPINGFSFLETDELTSQVSSFQSLAGSYKQPFILSSQDSSAVVLPDSTNSPLFHDVWDTQLNGLKFDQFSPLMQQDLYASQNICMSNSTTSNILDPPLSNTVLDDFCAIKDTDFQNHPSGCLVGNNNTSFAQDVQSQITSASFADSQAFSRQDFPDNSGGTGTSSSNVDFDDCSLRQNSKGSSWQKIATPRVRTYTKVQKTGSVGRSIDVTSFKDYEELKSAIECMFGLEGLLTHPQSSGWKLVYVDYESDVLLVGDDPWEEFVGCVRCIRILSPTEVQQMSEEGMKLLNSAGINDLKTSVS*
>AT1G30330.2
MRLSSAGFNPQPHEVTGEKRVLNSELWHACAGPLVSLPPVGSRVVYFPQGHSEQVAASTNKEVDAHIPNYPSLHPQLICQLHNVTMHADVETDEVYAQMTLQPLNAQEQKDPYLPAELGVPSRQPTNYFCKTLTASDTSTHGGFSVPRRAAEKVFPPLDYSQQPPAQELMARDLHDNEWKFRHIFRGQPKRHLLTTGWSVFVSAKRLVAGDSVLFIWNDKNQLLLGIRRANRPQTVMPSSVLSSDSMHLGLLAAAAHAAATNSRFTIFYNPRASPSEFVIPLAKYVKAVYHTRVSVGMRFRMLFETEESSVRRYMGTITGICDLDPTRWANSHWRSVKVGWDESTAGERQPRVSLWEIEPLTTFPMYPSPFPLRLKRPWPPGLPSFHGLKEDDMGMSMSSPLMWDRGLQSLNFQGMGVNPWMQPRLDTSGLLGMQNDVYQAMAAAALQDMRGIDPAKAAASLLQFQNSPGFSMQSPSLVQPQMLQQQLSQQQQQLSQQQQQQQQLSQQQQQQLSQQQQQQLSQQQQQQLSQQQQQQAYLGVPETHQPQSQAQSQSNNHLSQQQQQVVDNHNPSASSAAVVSAMSQFGSASQPNTSPLQSMTSLCHQQSFSDTNGGNNPISPLHTLLSNFSQDESSQLLHLTRTNSAMTSSGWPSKRPAVDSSFQHSGAGNNNTQSVLEQLGQSHTSNVPPNAVSLPPFPGGRECSIEQEGSASDPHSHLLFGVNIDSSSLLMPNGMSNLRSIGIEGGDSTTLPFTSSNFNNDFSGNLAMTTPSSCIDESGFLQSSENLGSENPQSNTFVKVYKSGSFGRSLDISKFSSYHELRSELARMFGLEGQLEDPVRSGWQLVFVDRENDVLLLGDDPWPEFVSSVWCIKILSPQEVQQMGKRGLELLNSAPSSNNVDKLPSNGNCDDFGNRSDPRNLGNGIASVGGSFNY*
>AT1G34170.3
MENNGEMNAQPELSVDITKTYMYEKLWNICAGPLCVLPKPGEKVYYFPQGHIELIENSTRDELDHIRPIFDLPSKLRCRVVAIDRKVDKNTDEVYAQISLMPDTTEVMTHNTTMDTRRPIVYFFSKILTASDVSLSGGLIIPKQYAIECFPPLDMSQPISTQNLVAKDLYGQEWSFKHVFRGTPQRHMFTSGGGWSVFATTKRLIVGDIFVLLRGENGELRFGIRRAKHQQGHIPSSVISANCMQHGVIASVVNAFKTKCMFNVVYKPRMQFEGKDFSEKRYDGTIIGVNDMSPHWKDSEWRSLKVQWDELSPFLRPNQVSPWDIEHLIPSSDISQSSLKKKKHWLQLNEIGATLSNLWTCQEIGQRSMNSPISVPEFSYPNAIEDSKFLSGLLLNHSLLAIPNENYNSDQMIQPRKEDITTEATTSCLLFGVDLTKVHMQGVAISRAVDLTAMHGYNQLIQKLEELFDLKDELRTRNQWEIVFTNNEGAEMLVGDDPWPEFCNMAKRIFICSKEEIKKMKLKNKFFQPESKALTSSDVPPNVTDN*
>AT1G34310.1
MESGNVVNAQPELSGIIDGSKSYVYEQLWKLCAGPLCDIPKLGEKVYYFPQGHIELVETSTREELNELQPICDLPSKLQCRVIAIHLKVENNSDETYAEITLMPDTTQVVIPTQNENQFRPLVNSFTKVLTASDTSAHGGFFVPKKHAIECLPSLDMSQPLPAQELLAIDLHGNQWRFNHNYRGTPQRHLLTTGWNAFTTSKKLVAGDVIVFVRGETGELRVGIRRARHQQGNIPSSIVSIDCMRHGVVASAKHAFDNQCMFTVVYKPRSSKFIVSYDKFLDAVNNKFNVGSRFTMRLEGDDFSERRCFGTIIGVSDFSPHWKCSEWRSLEVQWDEFTSFPGPKKVSPWDIEHLMPAINVPRSFLLKNKRLREVNEIGSSSSHLLPPILTQGQENEQLSVASPMNISLRYRDATEDAMNPSKLLMSYPVQPMPKLNYNNQMVTEMEENITTKTGTNFRLFGVTLDTPPVIKDPIEEIGSEISKLTEGKKFGLSQTLRSPTEIQNKQFSSSRTCTKVQMQGVTIGRAVDLSVLNGYDQLILELEKLFDIKGQLQTRNQWEIAFTDSDEDKMLVGDDPWPEFCNMVKKIFIQKRR*
>AT1G34390.1
MESGNIVNAQPELSGIIDGSKSYMYEQLWKLCAGPLCDIPKLGEKIYYFPQGNIELVEASTREELNELKPICDLPSKLQCRVIAIQLKVENNSDETYAEITLMPDTTQVVIPTQNENQFRPLVNSFTKVLTASDTSGGFFVPKKHAIECLPPLDMSQPLPTQELLATDLHGNQWRFNHNYRGTPQRHLLTTGWNAFTTSKKLVAGDVIVFVRGETGELRVGIRRAGHQQGNIPSSIISIESMRHGVIASAKHAFDNQCMFIVVYKPRSSQFIVSYDKFLDAVNNKFNVGSRFTMRFEGDDFSERRYFGTIIGVSDFSPHWKCSEWRNLEVQWDEFASFSRPNKVSPWEIEHLMPALNVPRPSLLKNKRLREVNEIGSSSSHLLPPILTQGQEIGQLSVASPMNISLTYRDTTEDVMNPSRLLMSYPVQPMPKLNYNNQMVTQIEENITTKTGTNFRLFGVSLVTPSVIKDPIEEIGSEISKLTEGKKFGQSQTLRSPTEIQSKQFSSTRTCTKVQMQGVTIERAVDLSVLNGYDQLILELEELFDLKGQLQTRNQWEIAFTDSDDDKMLVGDDPWPEFCNMVKKILIFKRGGQKLEVQ*
>AT1G34410.1
MESGNIVNAQPKLSGIIDGSKSYMYEQLWKLCAGPLCDIPKLGENVYYFPQGNIELVQASTREELNELQPICDLPSKLQCRVIAIHLKVENNSDEIYAEITLMPDTTQVVIPTQSENRFRPLVNSFTKVLTASDTSAYGGFSVPKKHAIECLPPLDMSQPLPAQEILAIDLHDNQWRFRHNYRGTPQRHSLTTGWNEFITSKKLVKGDVIVFVRGETGELRVGIRRARHQQGNIPSSIVSIDCMRHGVIASAKHAFDNQCIFIVVYKPRSSQFIVSYDKFLDAVNNKFNVGSRFTMRFEGDDFSERRYFGTIIGVSDFSPHWKCSEWRSLEVQWDEFASFSRPNKVSPWEIEHLVPALNVPRSSLLKNKRLREVNEFGSSSSHLLPPILTQGQEIGQLSVASPMNISLRYRDTTEAAMNPSRLLMSYPVQPMPKLNYNNQMVTQIEENITTKAGTNFRLFGVTLDTPPMIKDPIKQIGSDISKLTERKKFGQSQTLRSPIEIQSKQFSSSRTCTKVQMQGVTIGRAVDLSVLNGYDQLILELEKLFDIKGQLQTRNQWKIAFTDSDGYEMLVGDDPWPEFCKMVKKILIYSKEEVKNLKSSKSLSS*
>AT1G35240.1
METGNVVNAQPELSGIIDGSKSYMYEQLWKLCAGPLCDIPKLGENVYYFPQGNIELVDASTREELNELQPICDLPSKLQCRVIAIHLKVENNSDETYAEITLMPDTTQVVIPTQSENQFRPLVNSFTKVLTASDTSAYGGFFVPKKHAIECLPPLPLPAQELLAKDLHGNQWRFRHSYRGTPQRHSLTTGWNEFTTSKKLVKGDVIVFVRGETGELRVGIRRARHQQGNIPSSIVSIDCMRHGVIASAKHALDNQCIFIVVYKPSIRSSQFIVSYDKFLDAMNNKFIVGSRFTMRFEGDDFSERRYFGTIIGVNDFSPHWKCSEWRSLEVQWDEFASFSRPNKVSPWEIEHLMSALNVPRSSLLKNKRLREVNEFGQEIGQLSVASPMNTSLRYRDTTEDAMNPSRLLMSYPVQPMPKLNYNNQMVTQIEENITTKAVTNFRLFGVSLAIPLVIKDPIEEIGSDISKLTEGKKFGQSQTLRSPIEIQSKQFGSTRTCTKVQMQGVTIGRAVDLSVLNGYDQLILELEKLFDLKGQLQTRNQWKIAFTDSDGYEMLVGDDPWPEFCKMVKKILIYSKEEVKNLKSSKSLSS*
>AT1G35520.1
METGNVVNAQPELSGIIDRSKSYMYEQLWKLCAGPLCDIPKLGEKVYYFPQGNIELVEASTREELNELQPICDLPSKLQCRVIAIHLKVENNSDETYAKITLMPDTTVSENLQVVIPTQNENQFRPLVNSFTKVLTASDISANGVFSVPKKHAIECLPPLDMSQPLPAQELLAIDLHGNQWSFRHSYRGTPQRHLLTTGWNEFTTSKKLVKGDVIVFVRGETGELRVGIRRARHQQGNIPSSIVSIDCMRHGVIASAKHAFDNQCMFIVVYKPRSSQFIVSYDKFLDAVNNKFNVGSRFTMRFEGDDLSERRYFGTIIGVSNFSPHWKCSDWRSLEVQWDEFASFLRPNKVSPWEIEHLMPALNVPRSSFLKNKRLREVNEFGSSSSHLLPPILTQGQEIGQLSVASPMNISLLYRETTEDAMNPSRLLMSYPVQPMPKRNYNNQMVTQIEENITTKAGTNFRLFGVSLATPPVIKDPIEQIGSDISKLTEGKKFGQSQTLRSPTKIQSKQFSSTRTCTKVQMQGVTIGRAVDLSVLNGYDQLILELEKLFDLKGQLQTRNQWKIIFTGSDEDEMLVGDDPWPEFCNMVKRIYIQKRR*
>AT1G35540.1
MESGNVVNTQPELSGIIDGSKSYMYEQLWKLCAGPLCDIPKLGEKVYYFPQGHIELVEASTREELNELQPICDFPSKLQCRVIAIQLKVENNSDETYAEITLMPDTTQVVIPTQNQNQFRPLVNSFTKVLTASDTSVHGGFSVPKKHAIECLPPLDMSQPLPTQEILAIDLHGNQWRFRHIYRGTAQRHLLTIGWNAFTTSKKLVEGDVIVFVRGETGELRVGIRRAGHQQGNIPSSIVSIESMRHGIIASAKHAFDNQCMFIVVYKPRSSQFIVSYDKFLDVVNNKFNVGSRFTMRFEGDDFSERRSFGTIIGVSDFSPHWKCSEWRSLEVQWDEFASFPRPNQVSPWDIEHLTPWSNVSRSSFLKNKRSREVNEIGSSSSHLLPPTLTQGQEIGQQSMATPMNISLRYRDITEDAMTPSRLLMSYPVQPMAKLNYNNVVTPIEENITTNAVASFRLFGVSLATPSVIKDPVEQIGLEISRLTQEKKFGQSQILRSPTEIQSKQFSSTRTCTKVQMQGVTIGRAVDLSVLNGYDQLILELEKLFDLKGQLQARNQWEIAFTNNEEDKMLVGEDPWPEFCNMVKKIFIYSKEEVKNLKSRKSLSS*
>AT1G59750.1
MAASNHSSGKPGGVLSDALCRELWHACAGPLVTLPREGERVYYFPEGHMEQLEASMHQGLEQQMPSFNLPSKILCKVINIQRRAEPETDEVYAQITLLPELDQSEPTSPDAPVQEPEKCTVHSFCKTLTASDTSTHGGFSVLRRHADDCLPPLDMSQQPPWQELVATDLHNSEWHFRHIFRGQPRRHLLTTGWSVFVSSKKLVAGDAFIFLRGENEELRVGVRRHMRQQTNIPSSVISSHSMHIGVLATAAHAITTGTIFSVFYKPRTSRSEFIVSVNRYLEAKTQKLSVGMRFKMRFEGEEAPEKRFSGTIVGVQENKSSVWHDSEWRSLKVQWDEPSSVFRPERVSPWELEPLVANSTPSSQPQPPQRNKRPRPPGLPSPATGPSGPVTPDGVWKSPADTPSSVPLFSPPAKAATFGHGGNKSFGVSIGSAFWPTNADSAAESFASAFNNESTEKKQTNGNVCRLFGFELVENVNVDECFSAASVSGAVAVDQPVPSNEFDSGQQSEPLNINQSDIPSGSGDPEKSSLRSPQESQSRQIRSCTKVHMQGSAVGRAIDLTRSECYEDLFKKLEEMFDIKGELLESTKKWQVVYTDDEDDMMMVGDDPWNEFCGMVRKIFIYTPEEVKKLSPKNKLAVNARMQLKADAEENGNTEGRSSSMAGSR*
>AT1G77850.1
MSPPSATAGDINHREVDPTIWRACAGASVQIPVLHSRVYYFPQGHVEHCCPLLSTLPSSTSPVPCIITSIQLLADPVTDEVFAHLILQPMTQQQFTPTNYSRFGRFDGDVDDNNKVTTFAKILTPSDANNGGGFSVPRFCADSVFPLLNFQIDPPVQKLYVTDIHGAVWDFRHIYRGTPRRHLLTTGWSKFVNSKKLIAGDSVVFMRKSADEMFIGVRRTPISSSDGGSSYYGGDEYNGYYSQSSVAKEDDGSPKKTFRRSGNGKLTAEAVTDAINRASQGLPFEVVFYPAAGWSEFVVRAEDVESSMSMYWTPGTRVKMAMETEDSSRITWFQGIVSSTYQETGPWRGSPWKQLQITWDEPEILQNVKRVNPWQVEIAAHATQLHTPFPPAKRLKYPQPGGGFLSGDDGEILYPQSGLSSAAAPDPSPSMFSYSTFPAGMQGARQYDFGSFNPTGFIGGNPPQLFTNNFLSPLPDLGKVSTEMMNFGSPPSDNLSPNSNTTNLSSGNDLVGNRGPLSKKVNSIQLFGKIITVEEHSESGPAESGLCEEDGSKESSDNETQLSLSHAPPSVPKHSNSNAGSSSQG*
>AT2G28350.1
MEQEKSLDPQLWHACAGSMVQIPSLNSTVFYFAQGHTEHAHAPPDFHAPRVPPLILCRVVSVKFLADAETDEVFAKITLLPLPGNDLDLENDAVLGLTPPSSDGNGNGKEKPASFAKTLTQSDANNGGGFSVPRYCAETIFPRLDYSAEPPVQTVIAKDIHGETWKFRHIYRGTPRRHLLTTGWSTFVNQKKLIAGDSIVFLRSESGDLCVGIRRAKRGGLGSNAGSDNPYPGFSGFLRDDESTTTTSKLMMMKRNGNNDGNAAATGRVRVEAVAEAVARAACGQAFEVVYYPRASTPEFCVKAADVRSAMRIRWCSGMRFKMAFETEDSSRISWFMGTVSAVQVADPIRWPNSPWRLLQVAWDEPDLLQNVKRVSPWLVELVSNMPTIHLSPFSPRKKIRIPQPFEFPFHGTKFPIFSPGFANNGGGESMCYLSNDNNNAPAGIQGARQAQQLFGSPSPSLLSDLNLSSYTGNNKLHSPAMFLSSFNPRHHHYQARDSENSNNISCSLTMGNPAMVQDKKKSVGSVKTHQFVLFGQPILTEQQVMNRKRFLEEEAEAEEEKGLVARGLTWNYSLQGLETGHCKVFMESEDVGRTLDLSVIGSYQELYRKLAEMFHIEERSDLLTHVVYRDANGVIKRIGDEPFSDFMKATKRLTIKMDIGGDNVRKTWITGIRTGENGIDASTKTGPLSIFA*
>AT2G33860.1
MGGLIDLNVMETEEDETQTQTPSSASGSVSPTSSSSASVSVVSSNSAGGGVCLELWHACAGPLISLPKRGSLVLYFPQGHLEQAPDFSAAIYGLPPHVFCRILDVKLHAETTTDEVYAQVSLLPESEDIERKVREGIIDVDGGEEDYEVLKRSNTPHMFCKTLTASDTSTHGGFSVPRRAAEDCFPPLDYSQPRPSQELLARDLHGLEWRFRHIYRGQPRRHLLTTGWSAFVNKKKLVSGDAVLFLRGDDGKLRLGVRRASQIEGTAALSAQYNQNMNHNNFSEVAHAISTHSVFSISYNPKASWSNFIIPAPKFLKVVDYPFCIGMRFKARVESEDASERRSPGIISGISDLDPIRWPGSKWRCLLVRWDDIVANGHQQRVSPWEIEPSGSISNSGSFVTTGPKRSRIGFSSGKPDIPVSEGIRATDFEESLRFQRVLQGQEIFPGFINTCSDGGAGARRGRFKGTEFGDSYGFHKVLQGQETVPAYSITDHRQQHGLSQRNIWCGPFQNFSTRILPPSVSSSPSSVLLTNSNSPNGRLEDHHGGSGRCRLFGFPLTDETTAVASATAVPCVEGNSMKGASAVQSNHHHSQGRDIYAMRDMLLDIAL*
>AT2G46530.3
MSQTSLEPLIISIIKLQILQLWLKLIAVGWNLGSNDDELYTELWKACAGPLVEVPRYGERVFYFPQGHMEQLVASTNQGVVDQEIPVFNLPPKILCRVLSVTLKAEHETDEVYAQITLQPEEDQSEPTSLDPPLVEPAKPTVDSFVKILTASDTSTHGGFSVLRKHATECLPSLDMTQPTPTQELVARDLHGYEWRFKHIFRGQPRRHLLTTGWSTFVTSKRLVAGDAFVFLRGETGDLRVGVRRLAKQQSTMPASVISSQSMRLGVLATASHAVTTTTIFVVFYKPRISQFIISVNKYMMAMKNGFSLGMRYRMRFEGEESPERIFTGTIIGSGDLSSQWPASKWRSLQIQWDEPSSIQRPNKVSPWEIEPFSPSALTPTPTQQQSKSKRSRPISEITGSPVASSFLSSFSQSHESNPSVKLLFQDPATERNSNKSVFSSGLQCKITEAPVTSSCRLFGFDLTSKPASATIPHDKQLISVDSNISDSTTKCQDPNSSNSPKEQKQQTSTRSRIKVQMQGTAVGRAVDLTLLRSYDELIKELEKMFEIEGELSPKDKWAIVFTDDEGDRMLVGDDPWNEFCKMAKKLFIYPSDEVKKMRSKSLLGDKGTIVNLESDQRTVHV*
>AT3G61830.1
MASVEGDDDFGSSSSRSYQDQLYTELWKVCAGPLVEVPRAQERVFYFPQGHMEQLVASTNQGINSEEIPVFDLPPKILCRVLDVTLKAEHETDEVYAQITLQPEEDQSEPTSLDPPIVGPTKQEFHSFVKILTASDTSTHGGFSVLRKHATECLPSLDMTQATPTQELVTRDLHGFEWRFKHIFRGQPRRHLLTTGWSTFVSSKRLVAGDAFVFLRGENGDLRVGVRRLARHQSTMPTSVISSQSMHLGVLATASHAVRTTTIFVVFYKPRISQFIVGVNKYMEAIKHGFSLGTRFRMRFEGEESPERIFTGTIVGSGDLSSQWPASKWRSLQVQWDEPTTVQRPDKVSPWEIEPFLATSPISTPAQQPQSKCKRSRPIEPSVKTPAPPSFLYSLPQSQDSINASLKLFQDPSLERISGGYSSNNSFKPETPPPPTNCSYRLFGFDLTSNSPAPIPQDKQPMDTCGAAKCQEPITPTSMSEQKKQQTSRSRTKVQMQGIAVGRAVDLTLLKSYDELIDELEEMFEIQGQLLARDKWIVVFTDDEGDMMLAGDDPWNEFCKMAKKIFIYSSDEVKKMTTKLKISSSLENEEYGNESFENRSRG*
>AT4G23980.1
MANRGGEYLYDELWKLCAGPLVDVPQAQERVYYFPQGHMEQLEASTQQVDLNTMKPLFVLPPKILCNVMNVSLQAEKDTDEVYAQITLIPVGTEVDEPMSPDPSPPELQRPKVHSFSKVLTASDTSTHGGFSVLRKHATECLPPLDMTQQTPTQELVAEDVHGYQWKFKHIFRGQPRRHLLTTGWSTFVTSKRLVAGDTFVFLRGENGELRVGVRRANLQQSSMPSSVISSHSMHLGVLATARHATQTKTMFIVYYKPRTSQFIISLNKYLEAMSNKFSVGMRFKMRFEGEDSPERRYSGTVIGVKDCSPHWKDSKWRCLEVHWDEPASISRPNKVSPWEIEPFVNSENVPKSVMLKNKRPRQVSEVSALDVGITASNLWSSVLTQPHEFAQSCITSQWSSPQQCHRDANEDAKKSDWLNNSYSVSNVAKDSTLNDQMVSPVEQKKPETTANYRLFGIDLMSSSLAVPEEKTAPMRPINISKPTMDSHSDPKSEISKVSEEKKQEPAEGSPKEVQSKQSSSTRSRTKVQMQGVPVGRAVDLNALKGYNELIDDIEKLFDIKGELRSRNQWEIVFTDDEGDMMLVGDDPWPEFCNMVKRIFIWSKEEVKKMTPGNQLRMLLREVETTLTTTSKTDNHSN*
>AT4G30080.1
MINVMNPMKGGTEKGLDPQLWHACAGGMVRMPPMNSKVFYFPQGHAENAYDCVDFGNLPIPPMVLCRVLAIKYMADAESDEVFAKLRLIPLKDDEYVDHEYGDGEDSNGFESNSEKTPSFAKTLTQSDANNGGGFSVPRYCAETIFPRLDYNAEPPVQTILAKDVHGDVWKFRHIYRGTPRRHLLTTGWSNFVNQKKLVAGDSIVFMRAENGDLCVGIRRAKRGGIGNGPEYSAGWNPIGGSCGYSSLLREDESNSLRRSNCSLADRKGKVTAESVIEAATLAISGRPFEVVYYPRASTSEFCVKALDARAAMRIPWCSGMRFKMAFETEDSSRISWFMGTVSAVNVSDPIRWPNSPWRLLQVAWDEPDLLQNVKRVNPWLVELVSNVHPIPLTSFSPPRKKMRLPQHPDYNNLINSIPVPSFPSNPLIRSSPLSSVLDNVPVGLQGARHNAHQYYGLSSSDLHHYYLNRPPPPPPPSSLQLSPSLGLRNIDTKNEKGFCFLTMGTTPCNDTKSKKSHIVLFGKLILPEEQLSEKGSTDTANIEKTQISSGGSNQNGVAGREFSSSDEGSPCSKKVHDASGLETGHCKVFMESDDVGRTLDLSVLGSYEELSRKLSDMFGIKKSEMLSSVLYRDASGAIKYAGNEPFSEFLKTARRLTILTEQGSESVVV*
>AT5G20730.1
MKAPSSNGVSPNPVEGERRNINSELWHACAGPLISLPPAGSLVVYFPQGHSEQVAASMQKQTDFIPSYPNLPSKLICMLHNVTLNADPETDEVYAQMTLQPVNKYDRDALLASDMGLKLNRQPNEFFCKTLTASDTSTHGGFSVPRRAAEKIFPALDFSMQPPCQELVAKDIHDNTWTFRHIYRGQPKRHLLTTGWSVFVSTKRLFAGDSVLFIRDGKAQLLLGIRRANRQQPALSSSVISSDSMHIGVLAAAAHANANNSPFTIFYNPRWAAPAEFVVPLAKYTKAMYAQVSLGMRFRMIFETEECGVRRYMGTVTGISDLDPVRWKNSQWRNLQIGWDESAAGDRPSRVSVWDIEPVLTPFYICPPPFFRPRFSGQPGMPDDETDMESALKRAMPWLDNSLEMKDPSSTIFPGLSLVQWMNMQQQNGQLPSAAAQPGFFPSMLSPTAALHNNLGGTDDPSKLLSFQTPHGGISSSNLQFNKQNQQAPMSQLPQPPTTLSQQQQLQQLLHSSLNHQQQQSQSQQQQQQQQLLQQQQQLQSQQHSNNNQSQSQQQQQLLQQQQQQQLQQQHQQPLQQQTQQQQLRTQPLQSHSHPQPQQLQQHKLQQLQVPQNQLYNGQQAAQQHQSQQASTHHLQPQLVSGSMASSVITPPSSSLNQSFQQQQQQSKQLQQAHHHLGASTSQSSVIETSKSSSNLMSAPPQETQFSRQVEQQQPPGLNGQNQQTLLQQKAHQAQAQQIFQQSLLEQPHIQFQLLQRLQQQQQQQFLSPQSQLPHHQLQSQQLQQLPTLSQGHQFPSSCTNNGLSTLQPPQMLVSRPQEKQNPPVGGGVKAYSGITDGGDAPSSSTSPSTNNCQISSSGFLNRSQSGPAILIPDAAIDMSGNLVQDLYSKSDMRLKQELVGQQKSKASLTDHQLEASASGTSYGLDGGENNRQQNFLAPTFGLDGDSRNSLLGGANVDNGFVPDTLLSRGYDSQKDLQNMLSNYGGVTNDIGTEMSTSAVRTQSFGVPNVPAISNDLAVNDAGVLGGGLWPAQTQRMRTYTKVQKRGSVGRSIDVNRYRGYDELRHDLARMFGIEGQLEDPQTSDWKLVYVDHENDILLVGDDPWEEFVNCVQSIKILSSAEVQQMSLDGNFAGVPVTNQACSGGDSGNAWRGHYDDNSATSFNR*
>AT5G37020.1
MKLSTSGLGQQGHEGEKCLNSELWHACAGPLVSLPSSGSRVVYFPQGHSEQVAATTNKEVDGHIPNYPSLPPQLICQLHNVTMHADVETDEVYAQMTLQPLTPEEQKETFVPIELGIPSKQPSNYFCKTLTASDTSTHGGFSVPRRAAEKVFPPLDYTLQPPAQELIARDLHDVEWKFRHIFRGQPKRHLLTTGWSVFVSAKRLVAGDSVIFIRNEKNQLFLGIRHATRPQTIVPSSVLSSDSMHIGLLAAAAHASATNSCFTVFFHPRASQSEFVIQLSKYIKAVFHTRISVGMRFRMLFETEESSVRRYMGTITGISDLDSVRWPNSHWRSVKVGWDESTAGERQPRVSLWEIEPLTTFPMYPSLFPLRLKRPWHAGTSSLPDGRGDLGSGLTWLRGGGGEQQGLLPLNYPSVGLFPWMQQRLDLSQMGTDNNQQYQAMLAAGLQNIGGGDPLRQQFVQLQEPHHQYLQQSASHNSDLMLQQQQQQQASRHLMHAQTQIMSENLPQQNMRQEVSNQPAGQQQQLQQPDQNAYLNAFKMQNGHLQQWQQQSEMPSPSFMKSDFTDSSNKFATTASPASGDGNLLNFSITGQSVLPEQLTTEGWSPKASNTFSEPLSLPQAYPGKSLALEPGNPQNPSLFGVDPDSGLFLPSTVPRFASSSGDAEASPMSLTDSGFQNSLYSCMQDTTHELLHGAGQINSSNQTKNFVKVYKSGSVGRSLDISRFSSYHELREELGKMFAIEGLLEDPLRSGWQLVFVDKENDILLLGDDPWESFVNNVWYIKILSPEDVHQMGDHGEGSGGLFPQNPTHL*
>AT5G60450.1
MEFDLNTEIAEVEEEENDDVGVGVGGGTRIDKGRLGISPSSSSSCSSGSSSSSSSTGSASSIYSELWHACAGPLTCLPKKGNVVVYFPQGHLEQDAMVSYSSPLEIPKFDLNPQIVCRVVNVQLLANKDTDEVYTQVTLLPLQEFSMLNGEGKEVKELGGEEERNGSSSVKRTPHMFCKTLTASDTSTHGGFSVPRRAAEDCFAPLDYKQQRPSQELIAKDLHGVEWKFRHIYRGQPRRHLLTTGWSIFVSQKNLVSGDAVLFLRDEGGELRLGIRRAARPRNGLPDSIIEKNSCSNILSLVANAVSTKSMFHVFYSPRATHAEFVIPYEKYITSIRSPVCIGTRFRMRFEMDDSPERRCAGVVTGVCDLDPYRWPNSKWRCLLVRWDESFVSDHQERVSPWEIDPSVSLPHLSIQSSPRPKRPWAGLLDTTPPGNPITKRGGFLDFEESVRPSKVLQGQENIGSASPSQGFDVMNRRILDFAMQSHANPVLVSSRVKDRFGEFVDATGVNPACSGVMDLDRFPRVLQGQEICSLKSFPQFAGFSPAAAPNPFAYQANKSSYYPLALHGIRSTHVPYQNPYNAGNQSSGPPSRAINFGEETRKFDAQNEGGLPNNVTADLPFKIDMMGKQKGSELNMNASSGCKLFGFSLPVETPASKPQSSSKRICTKVHKQGSQVGRAIDLSRLNGYDDLLMELERLFNMEGLLRDPEKGWRILYTDSENDMMVVGDDPWHDFCNVVWKIHLYTKEEVENANDDNKSCLEQAALMMEASKSSSVSQPDSSPTITRV*
>AT5G62000.1
MASSEVSMKGNRGGDNFSSSGFSDPKETRNVSVAGEGQKSNSTRSAAAERALDPEAALYRELWHACAGPLVTVPRQDDRVFYFPQGHIEQVEASTNQAAEQQMPLYDLPSKLLCRVINVDLKAEADTDEVYAQITLLPEANQDENAIEKEAPLPPPPRFQVHSFCKTLTASDTSTHGGFSVLRRHADECLPPLDMSRQPPTQELVAKDLHANEWRFRHIFRGQPRRHLLQSGWSVFVSSKRLVAGDAFIFLRGENGELRVGVRRAMRQQGNVPSSVISSHSMHLGVLATAWHAISTGTMFTVYYKPRTSPSEFIVPFDQYMESVKNNYSIGMRFKMRFEGEEAPEQRFTGTIVGIEESDPTRWPKSKWRSLKVRWDETSSIPRPDRVSPWKVEPALAPPALSPVPMPRPKRPRSNIAPSSPDSSMLTREGTTKANMDPLPASGLSRVLQGQEYSTLRTKHTESVECDAPENSVVWQSSADDDKVDVVSGSRRYGSENWMSSARHEPTYTDLLSGFGTNIDPSHGQRIPFYDHSSSPSMPAKRILSDSEGKFDYLANQWQMIHSGLSLKLHESPKVPAATDASLQGRCNVKYSEYPVLNGLSTENAGGNWPIRPRALNYYEEVVNAQAQAQAREQVTKQPFTIQEETAKSREGNCRLFGIPLTNNMNGTDSTMSQRNNLNDAAGLTQIASPKVQDLSDQSKGSKSTNDHREQGRPFQTNNPHPKDAQTKTNSSRSCTKVHKQGIALGRSVDLSKFQNYEELVAELDRLFEFNGELMAPKKDWLIVYTDEENDMMLVGDDPWQEFCCMVRKIFIYTKEEVRKMNPGTLSCRSEEEAVVGEGSDAKDAKSASNPSLSSAGNS*
>ATMG00940.1
MRKSADEMFIGVRRAPISSNVGGTSFYGGDEYCSYYQSNGGVAKEDDGSAKKGFRRTGKGKLTAEAVSEAINRAAQGLPFEVVYYPTAGWSDFVVKAEDVEASMAIFWTPGTRVKMAMETEDSSRITWFQGIVFYTYQETGPWRGSPWNSFRYKIPFTIPLIFL*
>Zm00001d000358_T001
MITFVDSAAMELERESGRCLVDPQLWHACAGGMVQMPPVHSRVYYFPQGHAEHAQGHAHADLPAGRVPALVLCRVDAVRFLADPDTDEVLARVRLAPVRPNEPDHADAAAPGAREDKPASFAKTLTQSDANNGGGFSVPRYCAETIFPRLDYSADPPVQTVLAKDVHGVVWKFRHIYRGTPRRHLLTTGWSAFVNQKRLVAGDSIVFMRTGNGDLCVGIRRAKKGGIGGGPEFPHHQPPDGGGYGYGYAGFSTFLRGEEDDAAARGKVRVLVRPEEVVEAANLAASGQPFEVVYYPRASTPEFCVKAGAVRAAMRTQWCAGMRFKMAFETEDSSRISWFMGTVAAVQVADPIRWPNSPWRLLQVAWDEPDLLQNVKRVSPWLVELVSSTPAIHHLTPFSPPSRKKLCIPLYPEGHQLPAPMFHGSPLVGRGVGPMRYFPDGGTPPAGIQGARHAQFGISLPDLHHLTRLQSSLSPHAHGLRHQLDHGARPRIAGGLIVGHPAARDDISCLLTIGTAPHKKPSDVKSAAAAPAPQLMLFGKPILTEQQISLGFRPLPAPKKSPSDDAAETERTVSNNSDASSPAGTASGSTPSISGGAPSSCQDNKAAATATATDDDDLLGHCKVFMQSEDVGRTLDLSAVASYEELYQRLADMFGVDRAELTSHVFYRDGASGALKHAGDEPFSEFTKTARRLTIQTDAR
>Zm00001d001879_T001
MSSSSAASIGQPPPPAPPPEEEKKCLNSELWHACAGPLVCLPTVGTRVVYFPQGHSEQVAASTNKEVDGHIPNYPNLPPQLICQLHDVTMHADVETDEVYAQMTLQPLNPQEQNDAYLPAEMGIMSKQPTNYFCKTLTASDTSTHGGFSVPRRAAERVFPPLDFTQQPPAQELIARDIHDVEWKFRHIFRGQPKRHLLTTGWSVFVSAKRLVAGDSVLFIWNEKNQLLLGIRHATRPQTVMPSSVLSSDSMHIGLLAAAAHAAATNSRFTIFYNPRASPTEFVIPLSKYIKAVFHTRISVGMRFRMLFETEESSVRRYMGTITEVSDADPVRWPSSYWRSVKVGWDESTAGERPPRVSLWEIEPLTTFPMYPSLFPLRVKHPWYSGLAALHDDSNALMWLRGVTGEGGFHSLNFQSPGIGSWGQQRLHPSLLSNDHDQYQAVVAAAAASQSGGYLKQQFLHLQQPMQSPQEQCNLNPLLQQQILQQASQQQMVSSDAQNIQSVLNPGAIQQQLHQLQQMQHTHNDQKQKIQPDQQYQVASSAVLPSPTSLPSHLREKFGFSDPNVNSSSFISSSSNENMLESNFLQVSSKSVDLSRFNQPVVSEQQQPQQQQAWKQKFMGSQSMSFGGSVSLNSPTSKDGSVDNKVGRDVQNQSLFSPQVDSSSLLYNMVPNLTSNVADNNISAFPSGSTYLQSPMYGCLDDSSGLLQNTGENDPTTRTFVKVIIF
>Zm00001d001945_T001
MMTSSYEKATSGVLRNAAALLDEMQLMGETQGAKKVINSELWHACAGPLVCLPQRGSLVYYFPQGHSEQVAATTKKIPNSRIPNYPSLPSQLLCQVHNITLHADKETDEIYAQMTLQPVHSETDVFPIPTLGAYTKSKHPSEYFCKNLTASDTSTHGGFSVPRRAAEKLFPQLDYSMQPPNQELIVRDLHDNMWTFRHIYRGQPKRHLLTTGWSLFVGAKRLKAGDSVLFIRDEKSQLLVGVRRATRQQPALSSSVLSTDSMHIGVLAAAAHAASSGGSFTVYYNPRTSPSPFVIPLARYNMATYLQPSVGMRFAMMFETEESSKRRCTGTIVGISDYEPMRWPNSKWRNLQVEWDEHGYGERPERVSLWDIETPENMVFSSPLNSKRQCLPSYGVSGLHVSSISKPQGSPFGNLQHMPGISSDIALLLLNQSAQNLGSSIACQQSSFSSIIQNAKQSYFPPTTLGASTGWNESQQQLNALGIQKGDQVSCDVQPGIDSITAPEMNVKPRVPRSTDSYSSQSISDPNSKSDPKTKTRRSKKSSSHKTISDKSEISSVPSQICDKQRHGSEPTSADFEAEQATCGNNEDSSGALTRGDFAGELQVQQVEQDGLLPPPKLESSKSPDGGKSVSSFPNQGCFSQFFEGLDWMIPPSCYQDSNGIHSVTTSDSIFNPSEGIPPSTMNADGMDAFQTSCLSECFPNSIQEFISSPDINTLTFMSPEMQHLDAQHDGSNLQSTSNSYVQMSFSEESQSASLSGLHMEAVHINSSCLQPLATGSFDAGTFSKLSNIKECQALPLQEIHNSSMGTPSCSMDAAAVEYCMDRSVKPLKPPVRTYTKVQKLGSVGRSIDVTRFRDYHELRSAIACMFGLQGKLEHPGSSDWKLVYVDYENDVLLVGDDPWEEFINCVRCIRILAPSEVQQMSENGVHVLNDCMQMA
>Zm00001d002929_T001
MGPQPPLHLPAANGDSIVDRDVWLACAVPLSRLPAVGAEVYYFPHGHAEQCPAHLPAPLPAPHLFPCTVAGVSLGADDETNEVFAKISLSPGPHRGPAAACRTDPTSDCPPQELSYFTKELTQSDANNGGGFSVPRYCADHIFPTLDFDANPPVQKLFMRDTRGNPWQFRHIYRGTPRRHLLTTGWSRFVNAKLLVAGDIVVFMRRHNGDLIVGLRRTPRYPLVFPRVGSGAGVDPDQPPPRNARARVPPQDVIEAARLAAEGRSFAVTYFPRQAAGEFIVPRDEVEGVLATRWEPGAQVRMQVMEAEDTRRTVWADGHVKSLHQNIWRALEIDWDDSSPLSPNLSRFVNAWQVELVTHPPLPNGARICNPIASLCHGDVSYPLIGSEIQGPPIPASMQGARHTGPCAAPSESSAVLTNRVLFPLLNPDLQMPPFTSPSDSSEILDPESASPPNKSVRLPPAELPVQVKSIQLFGATIMVHVVRSVACGGCCEELNGAPSGDATADGSVGKDV
>Zm00001d003011_T001
MSEGSRSARDGQQHQQPRPVSFTKVLTASDANNGDVFSVLANCAKAVFPELDYSLGTPKQFVCVRDVHGVEWMFCHIWRGSPKRHLLTAGWNNFVNTKKLRFGDSVVFMREEDSKIHVGLRRTNRLFGAMQGNGGGPAGAVVGPSDGKVSTEDVVAAARLAGAGLWFEVVYYPHVASSEFCVSVAAVKESMQVPWFPGLQL
>Zm00001d003601_T001
MAAAMDAPNPGAAAGPGMPSDALYQELWHACAGPLVTVPRQGERVYYFPQGHMEQLEASAHHQQLDQYLPMFDLPPKILCRVVNVELRAEADSDEVYAQIMLQPEADQNELTSLDAEPQEREKCTAHSFCKTLTASDTSTHGGFSVLRRHAEECLPQLDMSQNPPCQELVAKDLHGTEWHFRHIFRGQPKRHLLTTGWSVFVSSKRLVSGDAFIFMRGENGELRVGVRRLMRQVNSMPSSVISSHSMHLGVLATASHAISTGTLFSVFYKPRTSRSDFIVSVNKYLEAKKQKISVGMRFKMRFEGDDAPERRFSGTIIGIGSLPAMSKSLWADSDWRSLKVQWDEPSSILRPDRISPWEVEPLDAANPQSPQPPLRAKRPRPPASPCMVSELPSGFGLWKSPIESSCTLSFSEPQRARELFPSIPTSTLSSSSNVSFNSKNEPSMLTSQFYWSARHTRADSCAASTNTVVIEKKQEPSSGGCRLFGINICSAEEEVLPEVTAPGVGYEQTAASVELNSDKLSQPSDVNNSDALAASSERSPLESQSRQVRSCTKVIMQGMAVGRAVDLTKLSGYSDLCQKLEEMFDIQGELGSTLKKWRVIFTDDEDDMMLVGDDPWDEFCRMVKRIYIYTYEEAKKLTSKSKLPVSSDSSKLSAANSLSE
>Zm00001d011953_T001
MPPAAMALPSQAPSNSGDPLYPELWRACAGPLVTVPRVGDLVFYFPQGHIEQVEASMNQVAGNPMRLYDLPSKLLCRVLNVELKAETDTDEVYAQIMLMPEPEQNDVAAEKTSSGSAAPPRPAVRSFCKTLTASDTSTHGGFSVLRRHADECLPALDMSQSPPTQELVAKDLHGMEWRFRHIFRGQPRRHLLQSGWSVFVSSKRLVAGDAFIFLRGENGELRVGVRRAMRQLSNVPSSVISSQSMHLGVLATAWHAINTKSMFTVYYKPRTSPSEFIIPYDQYMESVKNNYSIGMRFRMRFEGEEAPEQRFTGTIVGCENLDPLWPDSSWRYLKVRWDEPSTIPRPDKVSPWKIEPASSPPVNPLPLSRGKRPRQNAPPPSPESSVLTKEGATKIDTDSAQTPHQNSVLQSQEQMSFRNNLTESTDSDSTVQKQMMWSPSPNGKVHTNFQPRPAMDNWMPLGRRETDFKDTRSAFKDARTASQSFGDTQGFFMQAYDDSRHRLSFNNQFQDQGSAHRFADPYFYMPQQPSLTVESGTRTQTANNDLRFWSERNSMYGNPSDQQQGFSFGQNTSSWLNQPLPQVEQSRVVRPHATVAPFDLEKTREGSGFKIFGFQVDTTNPSPVQLSSPLSAIREHVVQTRPSAPVNELQPVQIECLPEVSVSTAGTAAENIQQVQQSSKDIQSKSQGASTRSCTKVHKQGVALGRSVDLSKFTDYGELKAELDKMFEFEGELVSANRNWQIVYTDNEGDMMLVGDDPWEEFCNIVRKIYIYTKEEVQKMNSKSSVPRKEEPPAAGEGCAAAAANE
>Zm00001d012731_T001
MGIDLNMVDGEGHERRPPPVTCRELWHACAGPVVALPRRGSLVVYLPQGHLAAAGGGDVAADLPPHVVCRVADVELCADAATDEVCARLALVAEGEAFGRNLGGGGVEGDDGMEDFDAERKSGMLHMFCKTLTASDTSTHGGFSVPRRAAEDCFPPLDYNQLRPSQELVAKDLHGAKWKFRHIYRGQPRRHLLTTGWSSFVNKKKLVSGDAVLFLRGDDGELRLGVRRAIQLKNEALFEDFNSDSTKRHSLTAVADSLKNRSVFHISYNPRATASEYIIPYAKFLKSLNHPVCIGARINFQCHNEDVSERRSGVVVRISEIDPMKWPGSKWRSLLVRWEDGAECNGQDRVSPWEIEIAGGSVSVSHSLSASSSKRTKLCPQGNLDVPAMWNGCTDSMETGKLPRVLQGQELMSFRTCHVPCAPQTAEAAKLQSSDASRFLSNAHGCALGGPTSRLAVHSSGFTYQCVGFNESIGFSEVLQGQEISRAVPKFQGMMSEACSLKDRYGLHSYMRAPVAVNGLSATTQECSLALSTPPGAQVPSLYPGNVVNRTVVPQLGLARKFGGGGTNGQQSGPFDRPRELWTRPQHETPDQMNLDQFETRRPSVPVDAAKLGSGGGEVRKTSCRLFGFSLTEKILPADDDDVKEVSYETECQNPRMLDLFGYNCSTPSAALPALCAAAPFGM
>Zm00001d014013_T001
MKEAGEERCLDPQLWHACAGGMVQMPPVRSRVYYFPQGHAEHAHGGGGATDLAGARARPLPPLVLCTVAGVRFLADPETDEVFAKIRLVPAAPGEVEFGEPREFGIDPEDAREKLSSFAKTLTQSDANNGGGFSVPRYCAETIFPKLDYRADPPVQTVLAKDVHGEVWKFRHIFRGTPRRHLLTTGWSAFVNQKKLVAGDSIVFLRTEHGELCVGIRRAKRVSCGGMECISGWNAPVYGALSAFLKDEEGKITKGPGGYMRGRGKVEITDVVEAASLAASGQPFEVVYYPRASTPEFVVKAASVQNAMRNQWCPGMRFKMAFETEDSSRISWFMGTIASAQVADTIRWPNSPWRLLQVLLHPMFPIPICHTSL
>Zm00001d014377_T001
MRLSSSSGSVLPAQPGSPEAVEEHKCLNSELWHACAGPLVSLPAVGSRVVYFPQGHSEQVAASTNKEIESQIPNYPNLPPQLICQLHNVTMHADAETDEVYAQMTLQPLNPQELKDPYLPAELGSANKQPTNYFCKTLTASDTSTHGGFSVPRRAAEKVFPPLDFTQQPPCQELMAKDLHGNEWKFRHIFRGQPKRHLLTTGWSVFVSAKRLVAGDSVLFIWNDNNQLLLGIRRANRPQTVMPSSVLSSDSMHIGLLAAAAHAASTNSRFTIFYNPRASPSEFVIPLVKYVKAVYHTRISVGMRFRMLFETEESSVRRYMGTITGICDLDSVRWPNSHWRSVKVGWDESTAGERQPRVSLWEIEPLTTFPMYPSPFPLRLKRPWPTGLPSLHGGKDDDLANSLMWLRDTANPGFQSLNFGGLGMSPWMQPRLDATLLGLQPDMYQAMATAAFQDATKQASPTMLQFQQPQNIAGRASPLLSSQILQQAHHQFQQQPYLQNISESTIQAQGQSEFLKQQIQRSQSFNEQKPQMQHQQESQQQQQPQCLPVPQHQQMQQQNMTNYQSISNALSPFSQLSPVSQSSPMALQTILPFSQAQSFTDTNVGSLSPSNGNTMQNTLRPFSSEAVSHLSMPRPTAIPVADPWSSKRVAVESLLPSRPQVSSQMEQLDPAPASIPHSSALAPLPGRGCLVDQDVNSDPQNHLLFGVSIDSQSLLMQGGIPGLQNGNDSAAIPYSTSNFLSPSQNDFPLDHTLNSSGCLDDSGYVPPCSDNSDKVNRPPATFVKVYKSGTYGRSLDITRFSSYHELRRELGRLFGLEGQLEDPLRSGWQLVFVDREEDVLLVGDDPWQEFVSTVSCIKILSPQEVQQMGKQGLELLSSAPARRLGSSCDDYVSRQESRSLSTGIASVGSVELG
>Zm00001d014507_T001
MITFVDSAAMERERESDRCLDPQLWHACAGGMVQMPAVHSKVYYFPQGHAEHAQGPVDLPAGRVPALVLCRVAAVRFMADPDTDEVFAKIRLAPVRPNEPGYADDAIGAAAASGAQEDKPASFAKTLTQSDANNGGGFSVPRYCAETIFPRLDYSADPPVQTVLAKDVHGVVWKFRHIYRGTPRRHLLTTGWSTFVNQKKLVAGDSIVFMRTENGDLCVGIRRAKKGGIGGPEFMHHHHQQPPPPQGGGYAGFSMFLRGEEDGGKMMAAAATRGKAARVRVRPEEVVEAANLAVSGQPFEVVYYPRASTPEFCVKAGAVRAAMRTQWCPGMRFKMAFETEDSSRISWFMGTVSAVHVADPIRWPNSPWRLLQVAWDEPDLLQNVKRVSPWLVELVSNMPVIHHLTATPFSPPRKKLCVPLYPELPLEGQFPAPMFHGSPLLGRGGAGGPMCYFPDGTPAGIQGARHAQFGISLSDLHLNKLQPGLSPHGLHRQLDHGVQVQVQQPRIAAGLIVGGHPAARDDVSCLLTIGTPKSKKPPSDVKKASTAAAPQLMLFGKAILTEQQISLGGGNVVPALAKKSPSDDDDDVAERTVSNSDVSSPGRSNQDGTSSGGGPAARACWQEEECNNRAAGSEDDLLGHCKVFMQSEDVGRTLDLSAVASYEELYQRLADMFGVDKAELTSHVFYRDDASGALKHPGDEPFSEFTKTARRLTILTDESSDSLAR
>Zm00001d014690_T001
MQKDVDGHVPSYPNLPSKLICLLHNVTLHADPETDEVYAQMTLLPVTSYGKEALQLSELALKQPRPQTEFFCKTLTASDTSTHGGFSVPRRAAEKIFPPLDFSMQPPAQEIQARDLHDNVWTFRHIYRGQPKRHLLTTGWSLFVSGKRLLAGDSVIFVRDEKQQLLLGTRRANRQPTNISSSVLSSDSMHIGILAAAAHAAANNSPFTIFYNPRASPTEFVVPFAKYQKALYGNQISLGMRFRMMFETEELGTRRYMGTITGISDLDPVRWKNSQWRNIQVGWDESAAGERRNRVSIWEIEPVAAPFFICPPPFFGSKRPRQLDDESSEMENLLKRAMPWLGEEICIKDPQTQNTIMPGLSLVQWMNMNMQQNSFANSAMQSEYLRSLSNPNMQNLGVADLSRQLNLQNQILQQNSIQFSSPKLPQQMQLANELSKASLPLNQIGVGTKPQEQTQDPNNLQRQQQSMNQLLPLSQSQTNLVQAQVLIQNQMQQQKQPTSMAQNQQPAASQSLILPQQQQQQQQHQQQKLVHQQQQILLQQQQLQQQQQLQQQQQNQQQLNKMAAQMPNLASHQPQLSDQQLQLQLLQKLQQQQQSLLSQPAVTLAQLPLIQEQQKLIIDMQQQLSNSQPLSQQQTMPQQSIQVPSRATPPPTTTVQQESQQKLPQKHVGFTDTSHTTIPPTTSVNTISVVGSPLMATGATHSVVTDEIPSCSTSPSTANGNHIVQPVLGRNQLCSMINYEKVPQSTPMSIPSSLEAVTATPRSIKELPKLNSNVKQSVMASKLPNAGHVAQNLTNNAPPTDYPETASSATSVWLSQADGLLHHSFPMSNFNQQQQMFKAAAPETDIQGADPSNNTLFGINGDGQLGFPMGADDFLSNGIDASKYQGHISTDIDGNYRISKDGQQEISSSMVSQSFGASDMAFNSIDSGMNDGGFVNRTSWPPAPPLKRMRTFTKVYKRGAVGRSIDISQFSGYDELKHALARMFSMEGQLEERQRIGWKLVYKDHEDDILLLGDDPWEEFVNCVKCIRILSPQEVQQISLDGDLGNNILPNQACSSSDGGNAWRARCDQNSGNPSTGSYDQFE
>Zm00001d015243_T001
MKQSPASSGVTAAPVVPAPAPAAASTGAAPPCEGERKAPAINADLWYACAGPLVSLPPVGSLVVYFPQGHSEQVAASMQKDIDAHVPSYPNLPSKLICLLHSVTLHADPDTDEVYAQMTLQPVNTYGKEALQLSELALKHARPQMEFFCKTLTASDTSTHGGFSVPRRAAEKILPPLDFGMQPPAQELQARDIHDNVWTFRHIFRGQPKRHLLTTGWSLFVGGKRLFAGDSVIFVRASPTEFVIPFAKFQKALYSNQISLGMRFRMMFETEELGMRRYMGTITGITDLDPVRWKNSQWRNLQVGWDESAAGERRNRVSMWEIEPIAAPFFICPQPFFGVKRPRQIDDESSEMENLFKRAMPWLGEEICIKDAQTHNTTMPGLSLVQWMNMNRPQSSTLNTGIQSEYLRSLSNPAMQNLGAAELARQLYVQNHLLQQNSVQLNASKLPQQVQPINELAKGSLSCNQLDVIINQQELKQEVGNQQRQQQPVNQAIPLSQAQTNLVQAQVIIQNQMQQQQQQQQQSPTRCQKGTSVQQLLLSQQQQDQNFQLQQQQQLLLQQLQQQNQQQQQQQQNQQQLNKLPAQLVNLAGQQAQLSDQELQLQLLQKLQQQSLVSQPTVTLSPLQVIQEQQKLLLDMQQLSSSHSLAQQRILPQQDSDVSLQASQAPPPMKQEQQKPSQKQFVLADVSDVVYPQISSTNVLSKAGTQLMTPGATQSVLTEEIPSCSTSPSTATGNHLAYPIIGRNEHCKVTIEKVPQSSSLMSIPTAGEAVTTPIMAKELSKLNHNLKENVTTSKSPIVGTGHENLLNIVPSTDNLETASSATSLWPTQTDGLLHQGFPTNFNQQQMFKDALPDVEIQEVDPTNNAFFGINSDGPLGFPMETEGLLVSAINPVKCQPNLSTDVEINYRIQKDAQQEISTSMVSQSFGQSDIAFNSIDSAINDGVMLNRNSCPPAPPQRMRTFTKVYKRGAVGRSIDIGRFSGYEELKHAVARMFGIEGQLEDRQRIGWKLVYTDHEDDVLLLGDDPWEEFVNCVKCIRILSPQEVQQMSLDGDLGNNVLSNQACSSSDGGNAWKPRRDQNPGNPSIGFYDQFE
>Zm00001d016838_T001
MAEAGVARGSGSAGDALFRELWHACAGPLVTVPRQGELVYYFPQGHMEQLEASTDQQLDQHLPLFNLPHKILCKVVNVELRAETDSDEVYAQIMLQPQTEVSRFTYIISCGSQSSHCIIVRFFVCSQSEPTSPDPEPPEPERCNIHSFCKTLTASDTSTHGGFSVLRRHAEECLPQLDMTQNPPWQELVAKDLHGNEWHFRHIFRGQPRRHLLTTGWSVFVSSKRLVAGDAFIFLRGENGELRVGVRRLMRQLNNMPSSVISSHSMHLGVLATASHAISTGTLFSVFYKPRTSRSEFVVSVNKYLEAKNHKMSVGMRFKMRFEGDESPERRFSGTIIGMGCMPANSTSPWANSEWRSLKVQWDEPSAILRPDRVSPWEVEPLDRTNPQPPQPPLRNKRARPPASPSIAPELAPVFGFWKSPAEPAQAFSFSGLQRTQELYHSSPSSMFSSSLNVGFNPKYEGPTPNTNHLYWTMRETRTESYSASINKAPTEKKQESTTSGCRLFGIEIGSSAVSPVVTVASVGHDPPPPALSVDAESDQLSQPSHANKATDAPAASSDRSPNETESRQARSCTKVIMQGVAVGRAVDLTRLDGYDDLRRKLEEMFDIPGELSASLKKWKVIYTDDEDDMMLVGDDPWSEFCRMVKRIYIYSYEEAKSLTPKAKLPAIGGDTGVKPDPSKLPPESDVPQSDSDNSAPVAADKD
>Zm00001d017284_T001
MITFADLTEPAAAGAERCVDRQLWLACAGSMCTVPLVGASVCYFPQGHAEHALGLDGAADLSAARVPALVPCRVTAVRYMADPDTDEVFARIRLVPLRGGEAHAGGLDDDVAAADEQEKPASFAKTLTQSDANNGGGFSVPRYCAETIFPRLDYAADPPVQNVVAKDVHGTAWKFRHIYRGTPRRHLLTTGWSTFVNQKKLIAGDSIVFLRGDSGDLHVGIRRAKRGFCGAGGGGGDEAPTPGWHHYAGLIRGNVSPCAAAKARGKVRPEDVAEAARLAAAGQSFEVVYYPRASTPEFCVRAAAVRAAMRVQWSPGMRFKMAFETEDSSRISWFMGTVAGVQVTDPIRWPQSPWRLLQVTWDEPDLLQNVKRVSPWLVELVSSMPAIHLASFSPPRKKPRIPAYPEFPFEGQLLNPAFPPSPLPHGQQHHHNFLHAHPPSFFPFPDGSAPAAIQGARHAQFVPSLSDLHLIHLQSSLLYPGLRRPDHVGPTIPIPSGISTDLTIGGAPARDGVPCALSVGASKQNPDAVKPAGLVLFGRTILTEHQMSLSSSGGATSPAATGNSSLCWTAEKGPNVSEGSGSGSGSGVIQNSPTGKNTSSERLPWFGDGSSQQASEPGLEPGQCKVFVESDTVGRNLDLSALGSFDELYGRLSEMFGVEGAEMRSRVLYRGATGEVRHAGDEPFSDFVKSARRITILTDAGSDNLGS
>Zm00001d023659_T003
MNMELKAEPDTDEVYAQLTLLPDKKQDENTSARVENEEAEEEVVPHVPPATSEGLRIHSFCKTLTASDTSTHGGFSVLRRHADECLPPLDMSQHPPNQELVAKDLHGVEWRFRHIFRGQPRRHLLQSGWSVFVSAKRLVAGDAFIFLRGENGELRVGVRRALRHQTTIPSSVISSHSMHLGVLATAWHAVNTGSMFTVYYKPRTSPAEFVVSRARYCESLKRNYSIGMRFRMRFEGEEAAEQRFTGTIVGICVSDPSGWADSKWRSLKVRWDEASSVPRPERVSPWQIEPAVSPSPVNPLPVRFKRSRSSVNASPSDVSTVNREVASKVMVESQQNNLPRALHNQGRTQLTGRYRDSTDVKTAQDLTMWSSGTEQQRNNIAAQTKRCLEGWTQSRTPEGYNQLFSAFQPLKDAHNPLRPFPNKISGTRSSTWVTADARYPAQQANHNMLHGTLSFMPHSSGFRMIQQNNLVTPEAANFTGKSAFTSLQGHVTDQCSTGWFGSIESNSHTDHASSSLIRSQPLVIGNDVQKTKGTSFKLFGIPLGSPEKSEPLVSPPSVAYDGKLQTSPTDNNEPCSEATQNIQNKVQSSSTRSCKKVHKQGSALGRSIDLTKFACYDELIAELDQMFDFDGELKSPCRNWLVVYTDNEGDMMLVGDDPWNEFCDMVHKIFIYTREEVERMNPGALNARLEDCLSDSLGRGLASKEPRSGPSTSAVDSENRANLSSQ
>Zm00001d025871_T001
MPASQAGAGAGAEPETKGSVHPQLWYACAGPTCTVPPVGTAVYYFPQGHAEHAGAAADANLHAPPFVPCRVAGVRFMAELDTDEIFVKIRLDPLRSGEPLTDVGEAQVVNDEAGQRQPTRPVISSAKTLTKSDSYSGGSLSVRRTCAETIFPKLDKSIKRPQQLVSARDVHGVEWTFRHVYRGTPERNLLTTGWSDFVNSKKIVIGDSVVFLREEDGTIHIGLRRAERASRRNAYGRQLVRGNASGTGAAADGVLRAEDVVAAAVTLAAAGNPFEVVHYPRATAPAFCVRVATVIEALQVSWCPGLRFKMAFEAKDLSRISWFMGTVAGVGPADPARWPLSPWRFLQVTWDEPELVRNMNRLSPWQVELVATMPNLPHFAAPPTPTPPRKKPRMPTYKEYQSQGRQLFDPVFPLNNPLPLPHPHHHPAPTHDWNCHGFVHCSSFPFPDSIAPAAAAGIQGARHANFAQFLFSDHLLSNLRRSLVLGGIRQYPGDHHAAPAPRIPIPTDDVKTGSETPRSPSHATKKRDGVKPPGIRLFGQEILTEEQMKGSHDGKATNNTSGRSGAPEFGLEPGQ
>Zm00001d026540_T001
MMASSQEKATSGVLRNAAALLDEMQLMGETQGAKKVINSELWHACAGPLVCLPQRGSLVYYFPQGHSEQVAATTKKIPNSRIPNYPSLPPQLLCQVHNITLHADKETDEIYCQMTLQPLHSETDVFPIPTLGAYTKSKHPTEYFCKNLTASDTSTHGGFSVPRRAAEKLFPQLVRASAQTRVFNPQDYSMQPPNQELIVRDLHDNMWTFRHIYRGQPKRHLLTTGWSLFVGAKRLKAGDSVLFIRDEKSQLLVGVRRATRQQPALSSSVLSTDSMHIGVLAAAAHAASSGGSFTIYYNPRTSPSPFVIPLARYNKATYLQPSVGMRFAMMFETEESSKRRCTGAIVGISDYDPMRWPNSKWRNLQVEWDEHGYGERPERVSIWDIETPENMVFSSPLNSKRQCLPSYGVPGLQIGSVNMSSIPRAQGNPIGNLQHMPGMGSELALLLLNQSGQNIGSPIACQQSSFSSIIQNAKHSYFPPKTFGASTASMKQESMPSTEAQPQLNALGIQRSDRVSCEVQTASDSNPAQEMSVKPRAPRSTDSHSSQSISDQNSKGEPRTKTRRSKKSSYQKTISDKSELCSVPSQICDDKKHGSEPRLADCEAEQATCGNNEESSGALTHGDFAGELQVQQQVEQHELLAPPKIESSKSPDGGKSVSSFPNQGCIPQFFEGLDWMIPPSYYQDSNGIQSVTASDNIFNPSEGIPSTMNADALDAFQTSCLSECFPSSIQEFIGSPDINTLAFMSPEMQQLDAGSNLPSTSNSYVQMSFSEESHSASLSGLHMEAIHINSSSCSQPLATGSFDAGAFPKLSNIRECQPLPLQEIHTSSMGTPSCSMDAAAEYGTDRSAKQMKPPVRTYTKVQKLGSVGRCIDVTRFRDYHELRSAIACMFGLQGKLEHPGSSDWKLVYVDYENDVLLVGDDPWEEFINCVRCIRILSPSEVQQMSENGVHVLNDCIQIA
>Zm00001d026590_T001
MHADVETDEVYAQMTLQPLNPQEQNDPYLPAEMGIMSKQPTNYFCKTLTASDTSTHGGFSVPRRAAERVFPPLDFTQQPPAQELIARDIHDVEWKFRHIFRGQPKRHLLTTGWSVFVSAKRLVAGDSVLFIWNEKNQLLLGIRRASRPQTVMPSSVLSSDSMHIGLLAAAAHAAATNSRFTIFFNPRASPSEFVIPLSKYIKAVFHTRISVGMRFRMLFETEESSVRRYMGTITEVSDADPVRWPSSYWRSVKVGWDESTAGERPPRVSLWEIEPLTTFPMYPSLFPLRVKHPWYSGVAALHDDSNALMWLRGVAGEGGFQSLNFQSPGVGSWGQQRLHPSLLSNDHDQYQAVVAAAAASQSDGYLKQQFLHLQQPMQSPQEQCNLNPLLQQQILQQGSQQQMVSPDAQNIQSVLNPNAIQQQLQQFQQMQHAHNDQKQKIQPDQPYQVPSSAVLSSPTSLPSHLREKFGFSDPNVNSSSFISSSSNENMLESNFLQGSSKSVDLSRFNQPVVSEQQQQQAWKQKFICSQSMSFGGSVSLNSPTTKDGPVDNKIGRDVQNQTLFSPQVDSSSLLYNMVPNLTSNVADNNISTIPSGSTYLQSPMYGCLDDSSGLLQNTGENDPTTRTFVKVYKSGSVGRSLDITRFSNYAELREELGQMFGIKGQLDDPDRSGWQLVFVDRENDVLLLGDDPWESFVNSVWYIKILSPEDVHKMGKPGNDPRYLS
>Zm00001d026687_T001
MEPQPPLPLANGHGNSIVDRDVWLACAAPLSRLPTVGDDVYYFPDGHAEQCPAHLPAPLPAPHFFPCTVTDISLGADDKTDEVFAKISLRPGLAAASRPDPGSSNSPPREPLSYSIKELSQSDANGGGSFCVPRYCGDHVWPKVDFEADPPMQNLVMHDTTGKQWEFRHVYRAKQPRHVLTTGWSKFVNAKLLVAGDIIVFMRRPNGDLIVGLRRMPRYAGTLHRPGTGGDAQDPDQPPPPPPRNALARVPPKDVMEAARLAAEGRPFTVTYYPRKAAGEFVVPRNEVEGVLDTLWEPGSHVLMQFAEAEDTRRTMWADGHVKAIHQKIWRALEIDWDVASSAISAQLGRFVNAWQVQRIAYPSICGGLGDLCYPLPLMESESQVMAMILEQMPPRTSASPPNNPPRPGPGQKVNTIMLFGATIHVVQSDTDDDGYEQLNRDPPPNAAGGGDDMDHDSAENI
>Zm00001d029481_T002
MPSSVLSSDSMHIGLLAAAAHAAATNSRFTIFFNPKASKTEFVIPLSKYIKAVFHTRISVGMRFRMLFETEESSVRSHVDEGDQGVNATQLLHNEPVLVTVSGDGSVGMWDVTLGQPCVRHIVAHTRRANAVVVALNDKYLCTGGSDQKVVSCLFVLLVSYVAYVMSYWKRFYIITEVGVHILIGIFHILSKEMIDMLPEIIELFR
>Zm00001d030801_T001
MATQQPLPPADGVGDNTVDRDVWLACAAPFSRIPTVGDEVYYFPDGHIEQHQHLSAAPLPAQDRFHCTVTDVSLGVDDKTDEVFAKISLRPRPGRAAAPPPGPGGSSNSPAPAPGPPQKLRYFTKDLSQTDVYAKFRIPLENEHVLPIPKVETDGADQQRVQRQDVVMRDTRGKSWRFSETYRVNPSKEHSLGTGWLDFAKAKRLAAGDKIVFMRRPNGDLIVGVRRLHVPRYRPFDFQGPAQDVMEAVRLAAAGRPFTVTYFPRQAAVEFIVPRSEVDDALATSWEPGAVVRMEVMEDENRQHTVWVHGRVNAIRQNIWRMLEIIWGVDPPLATTRSVNAWQVASLPPLATTGRSVIRSESESQAQSPSSSTRASRHTDSGPSATPFSATPPRTISIPSASPPNNPVSLSPLQNVKTIKLFGETISVDGGGGGGSEQVNRAPPSS
>Zm00001d030803_T001
MATQQPLPPADCVGDNTVDRDVWLACAAPFSRIPTVGDEVDYFPDGHIEQHLSAAPQPLPAQHRFHCTVTDVSLGVDDKTDEVFAKISLRPRPGRAAAPPPGPGGSSNSPAPSPPQKLRYFTKELSQTDVYARFRIPLDNEHVLPIPMVDTDGVQRQDVVMRDTSGKSWRFSKTYSVNPSKQHSLTTGWLDFAKAKRLAAGDKIVFMRRPNGDLIVGVRRLDVPRYPLFDFQGPDPDQPAQDVMEAVRLAAAGRPFTVTYFPRQAAVEFIVPRSEVDDALATSWEPGALVRMEVMEDENRQYTMWVVGRVEAIRQNIWRMLEVLKLSSRLPSIGLMTFTP
>Zm00001d031064_T001
MVDSLFRAEQLRKSSLHWIFHNSLQCKSWLQEICMIMNGNFVIFFVIAGDLQLRWISPAAYKDIYRGQPKRHLLTTGWSVFVSAKRLVAGDSIIFIWNDNNQLLLGIRRASRPQTVMPSSVLSSDSMHIGLLAAAAHAAATNSRFTIFYNPRASPSEFVIPLAKYVKAVYHTRVSVGMRFRMLFETEESSVRRYMGTITGISDLDSERWPNSHWRSVKVGWDESTAGDKQPRVSLWEIEPLTTFPMYPTAFPLRLKRPWASGLPMFNGGRSDEFARYSSLMWLRDGNRGAQSLNFQGLGASPWLQPRIDYPLLSLKPDTYQQMAAAALEEIRAGDHLKQASSLLPVQQTQTLNGGLDHLYGNPVLQQMQFQSQQSTLQAVQQGYGQNANDSGYVQNQLQQLQLQKQQEPPPPQQQQQTQVLQRQAHQEMQQHLSASCHDIANVASGVSMSGSACQSQSSLLSGSSFYQQNIFDGNGGPDLHLHNSFHNFSSQESSNLLNLPRSGQLMASEGWPSKRLAVESLAGHEIQPLQHKLEKVSHQSTVSHCSGTLPPLSARDGSSAQACGTNVQSHLLPSSFAIHDGLSTIRSGGVGSGTDAITIASLRYSDANLLPENSIATSSCLGESGTFNSLDDVCGVNPSQGGTFVKVYKSGSLGRSLDITRFGSYYELRVELERLFGLEGQLEDPARSGWQLVFVDRENDVLLLGDDPWQEFVNSVGCIKILSPQDLQQMARGGGGDLLSAPGARMLQGSVCDDYSAGHDVQNLTGSIAPVVPLDY
>Zm00001d031522_T001
MEAPGTSSGGAGGEGAGGTKVNEELWYACAGPLVALPPAGSLVVYFPQGHSEQVAASMRKDADAKIPSYPNLSSKLICILRSVTMLADPDTDEVYARMTLQPVSNVTHCDKETLLATELALKQTRPQTEFFCKTLTASDTSTHGGFSVPRRAAERIFPHLDFSVQPPAQELQARDLHDAIWTFRHIYRGQPKRHLLTTGWSLFVSGKRLLAGDSVLFIRDGRQQLLLGIRRANRQPVNLSSSVLSSDSMHIGILAAAAHAAANNSQFTVFYNPRASPSEFVIPFAKYQKAVYSNQLSLGMRFRMMFETEESATRRYMGTITGISDMDPLRWKNSQWRNIQVAWDEAAPSERRTRVSLWEVEPVIAPFFIYPSPLFTAKRPRQPGVTDDDSSEMDNLFKRTMPWFGEEVGKRDLSTQNGLVPGLSLVQWMNMQHNPSLANTVMQPELLNSLAGKPVQTLAAADLSRQISFQPQFLQQNNIQFNTSLLPPQNQQTEQLANVIATPNQLGSVIVPQKAVQNSSSEQKQNLVTQPLQVSQPMVSVAQPQLVHTQLQQPQVVLQAQPQQPQVIVQAQLQQQQPLVQNHTTIQSGLQQIQLLQQQQVQQSVQEQQQIKIQPFQVPNDANMVTQLSDQMKIQLLKALQPQQPLVMEQQKMIFDLQQQAVNSQSTAQQCSQVATQVVGLHSSSTNQYPTQQKTQPLKTFQDFPGNAVSIVKPEIVTSVGARSLHVPGGVQSMKMDEVPSSSTSPSTNNNPVILRSTPSSSKNQCLPTAAKAPQSSVVLGSTLEQGMKPCDSTQHPMVIPKLAEERPATGQDYMNSTQLDYLDTSSSATSVCLSQADGSLQQSFPPSSFNQHQPLREAVPDSEFEVTDAGNNFLFGANIDGHMEPLNEDDLLGTAFEADKYMEQMPGNGISNYISSKDSQQELSSSMISHPFGVADIAFNSIDSSINDIQFLNRNSRAPGPVQQRMRTYTKVHKRGAVGRSIDINRYSGYDELKHDVARMFGIEGQLSDQNRVGWKLVYEDHEKDVLLVGDDPWEDFVNCVRCIRILSPQEERQMRLASDYGDSFLGNQACSSSDGGRPWRVTGD
>Zm00001d032683_T001
MKEVAEERCLDPQLWHACAGGMVQMPPVRSRVYYFPQGHAEHAHGGGAADLAGARALPSLVLCSVTGVRFLADPETDEVFAKIRLVPVAPGEVEFREPDEFSVDPADAREKLSSFAKTLTQSDANNGGGFSVPRYCAETIFPKLDYRADPPVQTVLAKDVHGEVWKFRHIYRGTPRRHLLTTGWSTFVNQKKLVAGDSIVFLRTEHGELCVGIRRVKRVSCGGMECMSGWNAPGYGALSAFLKDEEGKMMKSHGGYMRGRGKVKITDVVNAASLAASGQPFEVVYYPRASTPEFVVKAASVQNAMRNQWCPGMRFKMAFETEDSSRISWFMGTIASAQVADPIRWPNSPWRLLQVAWDEPDLLQNVKCVNPWLVEIVSSIPPIHLGPFSPPRKKLRVPHHPDFPFDGQLLNPIFHGNPLGPSNGGGALRCFSDIAPAGIQGARHAQFGLPLTDRQLNKLHLGLFQGGGFKRRLDAITPPCPISRGFVIGSAPVDESVSCVLTIGTPRAAERSDDRKKPHLMLFGKPILTEQQMSSRGSRETLSPEATGNSSDGSVQKTGNVSDGSGSSICIGSSSRGREASRLGFEFEAGHCKVFVESEDVGRTIDLSVFGSYEELYGQLADMFGIEKAEVMSHLCYRDAAGAVKRTGDEPFCDFMKVARRLTIVESTEGRLQKPLVEYMA
>Zm00001d036593_T001
MRLSSSSSSSASVLPAQPGSPEGPALRVCRYATAQGPQVHSPMISRSIRNLQIAVLSYQNKTNTSAVTDVEEHKCLNSELWHACAGPLVSLPAVGSRVVYFPQGHSEQVAASTNKEMESQIPSYPNLPPQLICQLHNVTMQADAETEEVYAQMTLQPLNPQELKDPYLPAELGLVSKQPTNYFCKTLTASDTSTHGGFSVPRRAAEKVFPPLDFTQQPPCQELMATDLHGNEWKFRHIFRGQPKRHLLTTGWSVFVSAKRLVAGDSVLFIWNDNNQLLLGIRRANRPQTVMPSSVLSSDSMHIGLLAAAAHAASTNSRFTIFYNPRASPSEFVIPLAKYVKAVYHTRISVGMRFRMLFETEESSVRRYMGTITGISDLDSVRWPNSHWRSVKVGWDESTAGDRQPRVSLWEIEPLTTFPTYTSPFPLRLKRPWPTGLPSLHGGKDDDLANSLMWLRDTTNPGFQSLNFGGLGMNSWMQPRLDTSLLGLQPDMYQAMATGAFQDPTKQASPTMLQFQQPQNIAGRAAPLSSQILQQAHPQFQQQPYIQNISESTIQAQGQSEFLKQQIQRSQSFNEQKPQLQPQQESQQQQQSQCLQAPQHQQIQQNIANYQSVSNALSAFSQLSSASQSTPMALQTILPFSQAQSFTDTSASSLSPSNTNTMQNTLRPFSSEAVSHLSMPRPTAIPVPDAWSSKRAAVESLLPSRPQDSSQMQQLDSTPASIPHSSALAPLPGRGCLVDQDANPDPQNHLLFGVSIDSQSLLMEGGIHGLQNGNDSTAIPYSTSNFLSPSQNDFPLDHTLNSSGCLDDSGYVPPCSDNSDQVNRPPATFVKVYKSGTYGRSLDITRFSSYHELRRELGRLFGLEGQLEDPLRSGWQLVFVDREEDVLLVGDDPWQEFVSTVSCIKILSPQEVQQMGKQGLELLSSAPAARRLGSSCDGYVSRQESRSLSTGIASVGSVEF
>Zm00001d038698_T001
MGIDLNAVGEDDPAGAVCAELWHACAGAGVALPRRGSAVVYLPQAHLAAGGCDGGGVSAPAPPRVPPHVVCRVVDVELRADAATDEVYARLALVAMDTMFGRNINDGETEEKNGEEEDGDGEKKHASHMFCKTLTASDTSTHGGFSVPRRAAEDCFPPLDYEQLRPSQELIAKDLHGMKWRFRHIYRGQPRRHLLTTGWSSFINKKKLVSGDAVLFLRGNDGELRLGVRRAVQLKNEALLEAVNCTDSKLLMLSAVANSLDNRSIFHICFNPRVGASEFIVPYCKFLKSLNYHFSVGTRFKVGCENEDANERSFGLIIGISEVDPIHWPGSKWKSLLIKWDGATKYSHQNRVSPWDIEGVGSSVSVTHRLSSSVSKRTKLCFPPSDLDTPILDGNGRPDSVETERFHRVLQGQELVHSSIHGTACSHSSDSPRCQGSYGRRFSADAWNCKMNDVMSGPRHLNATGFAYQPLGFSESVKFSEVLQGQEMSQAVPSFMRSAFNSGTQNGRVRPFDYVQRSDATQGYALQQFNLPATEVHSPSSVLMFNQTMVPHAELDGATNREEVHGSRYLSSNAIGREAEPWPSMQQQRASVNGSEPLDTTEASAPARNAESGSVGRGAGRSNCKLFGFSLTEKILGTDGGGVKEGNYEVDRQTPRVLDLFGHGSTPGALHALCAAPLGI
>Zm00001d039006_T002
MAGIDLNDTVEEDEEEAEPGNACSQQSRTSSAATFPPPPPNQPRPSAAVCLELWHACAGPVAPLPRKGSVVVYLPQGHIEHLGDAAAAGGGAPPPVALPPHVFCRVVDVTLHADASTDEVYAQLALVAENEDVARRLRGRSEDGSAEDGDEGETVKQRFSRMPHMFCKTLTASDTSTHGGFSVPRRAAEDCFPPLDYSQQRPSQELVAKDLHGTEWRFRHIYRGQPRRHLLTTGWSAFVNKKKLVSGDAVLFLRGDNGELRLGVRRAAQLKNGSAFPALYNQCLNLGSLPNVAHAVATKSVFHIYYNPRLSQSEFIIPFSKFIKSFSQPFSAGSRFKVKYESDDASERRCTGIIAGIGDADPMWRGSKWKCLMVCCLLSFNDSLSVRWDDDVDFRQPNRISPWEIELTSSVSGSHMSAPNAKRLKPCLPHVNPDYLVPNGSGRPDFAESAQFHKVLQGQELLGYRTHDNAAVATSQPCEATNMQYIDERSCSNDASNIIPGVPRIGVRTPLGSPRFSYRCSGFGESPRFQKVLQGQEVFHPYRGTLVDASLSNSGFHQQDGSHVPTQASKWHAQLHGCAFRGQQAPAVPSQSSSPPSVLMFQRGDPKMSPFEFGHFHVNKKEDRRAMFVHAGGIGGTEQTTMLQAHHVSGGTGNRDVTVEKSHPAVAAASDNREVSKNSCKIFGISLTEKVPAMKEKGCGDINTNYPSPFLSLKQQVPKSLGNSCATVHEQRPVVARVIDVSTVDMMI
>Zm00001d039267_T001
MAQGAGRDPEELFEELWRACAGPLVELPQTNERVFYFLQGHLEQLQEPTDPALLAEQIKMFQVPNKILCKVVNVELKARRDRNGRDVRPDHSAAGTRCKATSQVDLPQLPEPPLQETSRPVVHSFCKILTPSDTSTHGGFSVLRRHANECLPALDMSMPTPTQELITKDLHGSEWRFKHIYRGQPRRHLLTTGWSTFVTSKKLIAGDAFVYLRSETGQQRVGVRRLVQKQSTMPASVISSQSMHLGVLASASHAIRTHSIFLVYYRPRLSQSQYIVRLNKYLESSKIGFDVGMRFKMSFEGDDVPIKKFSGTVVDKGDLSPQWQGSEWKTLKVKWDEATNLNGPERVSSWEIEPFDASAPAITMPVQPSMKNKRPRETAEGLDIHALEPAQEFWLSGRPEQHEKTSVSSSEPKHQVAWTSERAGYSAMSSSICQNSAVTGSWFKGFNSSGSHPSLPEISQKLFQVTSNDARVPPWPGLSAYHADEPSSKLSCNTALCSYQTEEVAPRFSNAVEEEKKEPGMFRLFGVNLINHARSSATADKTSVGAGETSARAAGSFEDSAQLSRVTKDHTHMVNGSPREIQSHQSCSGRSRIKVQMHGNDVCRAVDLGNLDGYEQLMGEVGEMFEIKDLGSKEKEEWKVTFINDENETMEVGAVPWQEFCQMVRKIVIHSIGDRGHMEACPCLGQDGKRDY
>Zm00001d041056_T001
MAAAACAGAEAGRGCGGKDALFVELWKACAGPLSCVPPLGEKVYYLPQGHIEQVEASTNQLAEQQGTPLYNLPWKIPCKLMNIELKVEPDTDEVYAQLTLLPDKKQDENTSTTVEEEEVVVPPALPATNEGPHIHSFCKTLTASDTSTHGGFSVLRRHADECLPPLDMSQHPPNQELVAKDLHGAEWRFRHIFRGQPRRHLLQSGWSVFVSAKRLVAGDAFIFLRGENGELRVGVRRALRHQTTIPSSVISSHNMHLGVLATAWHAVNTDSMFTVYYKPRTSPAEFVVSRDRYYESLKRNYSIGMRFKMRFEGEEAAEQRFTGTIVGIGASDPSGWADSKWRSLKVRWDEPSSISRPERVSPWQIEPSVSPCHVNPLPVRFKRSRSSVNALPSDVSTVTREVTSKVMADSQQNSLTRALHNQGRTQLTVRYHDNSDVKTTQDLTVWSSGTEQQRNNIAAQTKLCLEGWTPTRSPEGYNQIFSAFKPLKDIHNPLGPFPSQISGTHSNSWDTADARYPVQQANYSMLPGTWSLRPHNSGFRMNQQNYLVMPEGANFTGKSAFTSLQDHGTDKCSTGCFGHIESSSHTDHASSSLIRPQPLVLGNGVQKSKGTSFKLFGIPLGSPEKSEPLVSPPSVAYDGKLQTSPSEKGNQLDVVEVDNCSHPSKTVKPLDGPQSDSITENNQPSPEATLNIQNKVQSSSTRSCKKVHHMLHLFPC
>Zm00001d041497_T001
MNLSPPRMSEPSLESDGEQRCLNSELWHACAGPLVSLPVVGSRVVYFPQGHSEQVAASTNKEVDAQIPNYPNLPPQLICQLHNVTMHADAETGEVYAQMTLQPLSPEEQKEPFLPIELGAGSNQPTNYFCKTLTASDTSTHGGFSVPRRAAEKVFPPLDFSQHPPVQELVARDLHDNEWKFRHIFRGQPKRHLLTTGWSVFVSAKRLVAGDSIIFIWNDNNQLLLGIRRANRPQTVMPSSVLSSDSMHIGLLAAAAHAAATNSRFTIFYNPRASPSEFVIPLAKYVKAVYHTRVSVGMRFRMLFETEESSVRRYMGTITCISDLDSERWPNSHWRSVKVGWDESTAGDKQPRVSLWEIEPLMAFPMYPTAFPLRLKRPWASGLPMFNGGRSDEFARYSSLMWLRDGNRGAQSLNFQGLGASPWLQPRIDYPLLGLKLDTYQQMAAAALEEIRAGDHLKQISSLLPVQQPQNLSGGLDPLYGNPVLQQMQFQSQQSSLQVVQQGYGPNASDSGFLQNQLQLQKQQEPLPQQQQQALQQQSHQEMQHHLSASCHDIANVASGVSESGSASQTESSLLSGSSYQQIYDGNSGPGLHLHNGFHNCSSQESSNLLNLSRSGQFMASEGWPLKRLAVESLSGHELQPVQHKFEKVNHQSNVSHISSTLPPLSARDSYSAQASGTNDQSHLLSSSFAIHDGLTAVRSGGVGSGTDAITIASLRYNDMNLLPENPIATSSCLGESGTFNSLDDVCGVNPSQGGTFVKVYKSGSPGRSLDITRFSSYYELRSELERLFGLEGQLEDPVRSGWQLVFVDRENDILLVGDDPWQEFVNSVWCIKILSPQDVQQMVRGGGDLLSTTGVRTLQGSVCDDYSAGHDMQNLTGSIAPVVPLDY
>Zm00001d042267_T001
MLMPEPEQTDVPAEKPSSAPAASPRPAVRSFCKTLTASDTSTHGGFSVLRRHADECLPPLDMTQSPPTQELVAKDLHGMEWRFRHIFRGQPRRHLLQSGWSVFVSSKRLVAGDAFIFLRGENGELRVGVRRAMRQLSNVPSSVISSQSMHLGVLATAWHAINTKSMFTVYYKPRTSPSEFIIPYDQYMESVKNNYSIGMRFRMRFEGEEAPEQRFTGTIVGCENLDPLWPDSSWRYLKVRWDEPSTIPRPDRVSPWKIEPASSPPVNPLVHSSRAKRPRQNVPPPSLESSVLTKEGATKVEIDSAQTQHQNSVLQGQEQMTLRNNLTESADSDSTVQKPMMWSPSLNGKAHTHFQQRPAMDNWMPLGRRENDFKDTRSAFKDARTASQSFGDTQGFFVQAYDDNHHRLSFKNQGSTHRFADPYFYMPQQSSVTVESSTRTQTANNDLCFWGDQNAMYGNPSDQQQGFNFGQNPSSWLNQPFPQVEQPRVVRPHATVAPFDLEKTREGSGFKIFGFQVDTTSPSPVQLSSPLPAIQEHVLQTRPSAPVNELQPVQIECLPEGSVSTAGTATENIQQAPQSSKDIQSKSQGASTRSCTKVHKQGVALGRSVDLSKFTDYGELQAELDKMFDFEGELVSGSQNWQIVYTDDEGDMMLVGDDPWEEFCSIVRKIYIYTKEEVQKMNSKSAAPRKEESPAAGGGGGCAAATNE
>Zm00001d043431_T001
MGIDLNMADGESQERRPPPAVCRELWHACAGPVVALPRRGSLVVYLPQGHLAAAGGGNVAVDLPPHVACRVADVELCADAATDEVYARLALVAEGEAFGRNLRGGGVDGDDDMEDFDVERKSRMLHMFCKTLTASDTSTHGGFSVPRRAAEDCFPPLDYNQLRPSQELVAKDLHGAKWKFRHIYRGQPRRHLLTTGWSSFVNKKKLVSGDAVLFLRGDDGELRLGVRRAIQLKNEALFDDFSCDSTKRHTLLAVADSLKHKSVFHISYNPRATASEYIIPHHKFLKSLNLPFCIGARINLQCHNEDVSERRSGMVVHVSEIDPMKWPGSKWRSLLVRWEDGVECNGQDRVSPWEIEIAGGSVSVAHSVSASSSKRTKLCPQGNLDVPTMYVTGNGNGCTDSVETGKFPRVLQGQDLMSFRTRHVPSAPQTVEAAKLQSSGASRFLSNARGCALGGPTSRLAVHNSDFTYQSVGFNESIGFSEVLQGQEISRAVPMFQGMMSEACSLKGGYGLHSYMRTPVAVTGLSATTQECSLTLSTPPGAQVPSVYPDNIFNRTVVRQLGLASKFDGGATNAQQSVPFDRPREIWSKPQHEISDQTKMDHFETRRASAPGDDAAKHGSGGEVVRKTSCRLFGFSLTEKILPADDDGIKEVTYEPECQNPRMLDLFGYNCSAPSAALPALCAAPFGM
>Zm00001d043922_T001
MAGIDLNTVEEEDEEEAEALPLPGPGGRGAVCLELWHACAGPVPPLPRKGSAVVYLPQGHLEHIGGDAARGAAASAVPPHVLCRVVDVTLHADGATDEVYARVSLLPEDEDAEKRAQAQARVREDEDRRDGEDGGAMRPLARTPHMFCKTLTASDTSTHGGFSVPRRAAEDCFPPLDYSQQRPSQELVAKDLHGTEWKFRHIYRGQPRRHLLTTGWSAFVNRKKLISGDAVLFLRGEDGVLRLGVRRAAQLKIVTPIPAPHNQCSSNSNLGNVAQAVATKTVFHIYYNPRLTQSEFIVPYWKFTRSFNQPISVGMRCRMRYESDDASERRCTGIIIGSREADPIWYGSKWKCLVVRWDDGIECRWPNRVSPWEIELTGSVSGSQMCAPSSKRLKPCLPQVNPEIVLPNGSVSSDFAGSARFHKVLQGQELLGFKTHDGPAISASQATEARNLQYSDERSNNNLGIPRLGVRSPTGIPGFPYHCSGFGESQRFQKVLQGQEVFHPFRGGCLADGHIRTAGMYQPDGRHVSGAAYKWSAPQGYDFPQPAKPVFLLQESSPSSVMMFPQTRSKITHLEYEYSRHEDGRLDRTVPTQDMGRSNQTLSLWPHLVSGEAIEECTGTVNMHSPVSGAEHESNNESTVENGCKIFGISLAEKIRSCDEADSCSAKCNSRLQPLKSQMPKSLGSCWATVHEQRPVVGRVVDVSATDM
>Zm00001d045026_T001
MKDHGSGGVTPSPAEGEKKPINSELWHACAGPLVSLPPVGSLVVYFPQGHSEQVRDLPVCSRTAGVAASMHKELDTVPSYPSLPSKLICKLLSLTLHADSETDEVYAQMMLQPVNKYDRDAMLASELGLKQNKQPTEFFCKTLTASDTSQPKRHLLTTGWSVFVSTKRLLAGDSVLFIRDEKSQLLLGIRRASRPQPALSSSVLSSDSMHIGILAAAAHAAANSSPFTIFYNPRASPSEFVIPLAKYNKALYTQVSLGMRFRMLFETEDSGVRRYMGTITGIGDLDPLRWKNSHWRNLQVGWDESTASERRTRVSIWEIEPVATPFYICPPPFFRPKLPKQAGMPDDENEVESAFKRAMPWLADDFALKDVQNALFPGLSLVQWMAMQQNPQMLATASPAVQSQYLTSNALGMQDGIGSVSEDPTKRLTMQAQNIGLPNLQAGSKVDHPAITPLAQHQQQPHHVLQQQQVQPLQQSSAILQQQQAQLLQQNAIHLQQQQEQLQRQQSQPQQQFKATACLQSSDQHKLKEQQPSGGQAASQVHLLNQILQPSSSQLQQLGLPKSPTQRPGLPSLTTMGSLQQSQLPQTPQPQQTAEYHQALLQSQQPQLQQLSQSELQLQLLQKIQQQNLLSQLNPQHQSQLIQQLSQKSQEILQQQVLQHQFGGADAMGQLKHLQQTPLNHNTGSLPPQQLVRSHSALTESEEPSSSTVPSGSRISPINSFSRANQGTRNLPEMPATPHIEHLLQEIQSKTDNRIKNDIQGSKETVHAPNRHLASDQLDASSATSFCLDESPREGFSFPPVCLDNNVQVDPRENFLIAENVDTLMPDALLSRGMSSGKGICNLPSGQRDHRDVENELSSAAFSSQSFGVPDMSFKPGCSSDVQKRGSVGRSIDITRYRGYEDLRHDLACMFGIQGQLEDPYRTDWKLVYVDHENDILLVGDDPWEYVPTSVSFISSVHPYHGVPLTCSASDVLKILPRPGSFLVGHTITLENVYYRSHLGGNAELACNRAFWDMFRSLSG
>Zm00001d049295_T001
MTSSAAAAAAAAQVAGGGGGGEGDAAAAARGGGGTEDGMYTELWNLCAGPLVTVPRVGDKVYYFPQGHIEQVEASTNQVAEQHMQFYDLPWKILCEVMNVELKAEPDNDEVYAQLTLLPESKQPEENGSSEEMPASPPAALARPRVHSFCKTLTASDTSTHGGFSVLRRHADECLPPLDMTRQPPTQELVAKDLHGVEWRFRHIFRGQPRRHLLQSGWSVFVSAKRLVAGDAFIFLRGDSGELRVGVRRAMRQQANVPSSVISSHSMHLGVLATAWHAVNTGTMFTVYYKPRTSPAEFVVPCDRYMESLKRNYPIGMRFKMRFEGEEAPEQRFTGTIVGNVDPDQAGWAESKWRYLKVRWDEASSIPRPERVSPWQIEPAVSPPPINPLPVHRPKRPRSNAVASLPESSAPTKEGLTSSCVQNLVGCMVILLMHVFYPILAAPKVTLETQQHALQRPLQTQDNVAPKSVFGDNSELDSAHKSSLRPSGFDLDKSTIGMQRKLGSDIWMRMNRPDGYSEMLSGYQPPNEGARNSQGFCSLPDQIAAGRPNFWHTVNAHYQDQQGNHNLFPGSWSMMPSSTGFGMNRQSYPMIQEVGGMSQSCTNTKFGNGVYAALPGRGIDRYPSGWFGHTTPGGRVDDAQPRVIKPQPLVLAHGEALKMKGNSCKLFGIHLDSPAKSEPLKSPPSVATPAAEKWMADGIDADKSPEPHKTPKQLGATQVDPVPERCPQASRGTQCKSQGGSTRSCKKVHKQGMALGRSVDLTKFNGYTELVAELDEMFDFNGELKGCSKEWMVVYTDYEGDMMLVGDDPWNEFCSMVHKIFVYTREEVQRMNPGALNSRPEDSGLANSTERGSASTAAAREAPGYQSASSLNSDNC
>Zm00001d050781_T001
MASAGVAGCSGSAGDALFRELWHACAGPLVTVPRQGELVYYFPQGHMEQLEASTDQQLDQHLPLFDLPPKILCKVVNVELRAETDSDEVYAQIMLQPEADQSEPTSPDSEPPEPERCNVYSFCKTLTASDTSTHGGFSVLRRHAEECLPQLDMTQNPPWQELLAKDLHGNEWHFRHIFRGQPRRHLLTTGWSVFVSSKRLVAGDAFIFLRGENGELRVGVRRLMRQLNNMPSSVISSHNMHLGVLATASHAISTGTLFSVFYKPRTSRSEFVVSVNKYLEAKNHKVSVGMRFKMRFEGDESPERRLSGTIIGLGSMPANSTSPWANSDWRSLRVQWDEPSAILRPDRVSPWELEPLDATNPQPPQPHLRNKRARPPALLSIAPELPQVFGFLKSPAEPAQAFSFSRPQQTQELYHSNPSSIFSSSLNVGFSSKNDRSTPINSHLYWTMRQTRTESYSASINKAPTEKKQESATSGCRLFGIEIVASSERSLNESESRQVRSCTKVIMQGMAVGRAVDLTRLDGYADLHRKLEEMFDIQGELSANLKKWKVIYTDDEDDTMLVGDDPWNEFLRMVKRIYIYSYEEAKSLTRKAKPPVVGDTIKPDPNKLPPESDVPHDSNNNAPVAADYQD
>Zm00001d051172_T001
MITFADLTEPAAAGAERCVDRQLWLACAGGMCTVPPVGASVYYFPQGHAEHALGLAGAADLSAARVPALVPCRVTAVRYMADPDTDEVFARIRLVPLRGGDADADAGGVEDDAAAADEQEKPASFAKTLTQSDANNGGGFSVPRYCAETIFPRLDYAADPPVQTVVAKDVHGAAWKFRHIYRGTPRRHLLTTGWSTFVNQKKLVAGDSIVFLRGDSGDLHVGIRRAKRGFCGAGGGGGDDSPAAGWDHYAGLMRGNVSPCAAAKARGKVRPEDVAEAARLAAAGQSFEVVYYPRASTPEFCVRAAAVRVAMRVQWSPGMRFKMAFETEDSSRISWFMGTVAGVQVTDPIRWPQSPWRLLQVTWDEPDLLQNVKRVSPWLVELVSSMPAIHLASFSPPRKKPRIPAYPEFPFEGQLLNPAFPPNPLPHGQHHHHFLHSHSHQHHHPPFFPFPAGSAPAAIQGARHAQFVPPFSELHLTHLQPSLLYPRLRRPDHVGPTTPIPARVSTDLTIGGAAAAARDDDDDDFPCAPPSTGANRQKPDAKPAGLVLFGRTILTEQQMSRSGATSPAATGNSSTCWNAEKGPNASEGSGGSGVIQTSPAKAASSERPPWLGGDGSQQQQASGELGLGLEPGQCKVFVESDTVGRNLDLAALRSFDELYGRLSGMFGVAGAELRSRVLYRGAAGDEPFSDFVRSARRLTVLTDAGSDNLGS
>Zm00001d053819_T001
MKLSPSASGGLQDQPASPEEAEEHKCLNSELWHACAGPLVSLPSVGSRVVYFPQGHGEQVAASTNKEMEAQIPNYPSLPPQLICQLHNVTMHADAETDEVYAQMTLQPLSPQELKDPFLPAELGTASNQPTNYFCKTLTASDTSTHGGFSVPRRAAEKVFPPLDFNQQPPAQELIAKDLHGNDWKFRHIFRGQPKRHLLTTGWSVFVSAKRLVAGDSVLFIWNDNNQLLLGIRRANRPQTVMPSSVLSSDSMHIGLLAAAAHAASTNSRFTIFYNPRASPCEFVIPMAKYVKAVYHTRISVGMRFRMLFETEESSVRRYMGTITGISDLDPVRWPNSHWRSVKVGWDESTAGEKQPRVSLWEIEPLTTFPMYPSPFALGLKRPWPAGLPSLYGGRGDGLTSSLMWLRDRANPGFQSLNFSGLGMSPWMQPRLDNSLLGLQSDMYQTIAAAAALQSTTKQVPPSAMQFQQPQNIADRSALLSSQILQQVQPRFQQIYPQNLNENKIQGHTQPEYLQVQQQLQRCQSFNEQKPPMHPQQQQQEPQQQQCVQTPQDQQMQEQKHLHNFHSLPDALSAFSQLSPATHSPPSALQTVPAFSHQQNFPDTNISSLSPSTGPSMHGMLGRLPSEAASSLPCVAMNAPVSVSDPWSSKRVAVESVNPCRPHVSPHIEHLDMATCNMPQSSALAPLPGRECLVDEDGCSDPQNHLLFGVHIDSHSLLMQGGIPALQNDNSSGTIPYSTSNFLSPSENDFPLNQPLRSAGCLDESDYLPCAENAEQANQQFATFVKVYKSGTVGRLLDITRFSSYDELRSEVGRLFGLEGQLEDPLRSGWQLVFVDREDDVLLVGDDPWQEFVNSVSCIKILSPEEVQRMGKPGIQLLSSAPSRRLGNGCDSYASMQEPRGLDAGMAPVGSVEF
